# Supplementary material for: Electrocatalytic Reductive Deuteration of (Hetero)Arenes
Source: Research Square preprint supplement (doi:10.21203/rs.3.rs-2687771/v1), 2023-03-24
Supplement: Supplementary file 1 [file eb7769664e5610240c3753ad.pdf]

# Supplementary Information

## Electrocatalytic Reductive Deuteration of (Hetero)Arenes

Faxiang Bu<sup>1,†</sup>, Yuqi Deng<sup>1,†</sup>, Jie Xu<sup>1</sup>, Dali Yang<sup>1</sup>, Yan Li<sup>1</sup>, Wu Li<sup>1\*</sup> and Aiwen Lei<sup>1\*</sup>

<sup>1</sup>College of Chemistry and Molecular Sciences, Institute for Advanced Studies (IAS), Wuhan University, Wuhan 430072, P. R. China.

<sup>†</sup>These authors contributed equally to this work.

\*Corresponding author. Email: aiwenlei@whu.edu.cn; wu.li@whu.edu.cn

## Contents

|                                                                                               |     |
|-----------------------------------------------------------------------------------------------|-----|
| 1. Materials and method.....                                                                  | 2   |
| 2. Catalyst preparation.....                                                                  | 3   |
| 3. General procedure for the electro-reductive deuteration reactions.....                     | 5   |
| 4. Reaction development and optimization.....                                                 | 8   |
| 5. Characterization of Ru-N/CF .....                                                          | 9   |
| 6. <sup>1</sup> H NMR and HRMS spectrum analysis of selected examples .....                   | 15  |
| 7. Procedure for H/D exchange of arenes .....                                                 | 25  |
| 8. Procedure for the synthesis of D-labeling drugs .....                                      | 27  |
| 9. Procedure for the synthesis of 10 g scale deuterated piperazine hydrochloride.....         | 36  |
| 10. Recycling experiment.....                                                                 | 37  |
| 11. Procedure for the synthesis of starting materials .....                                   | 37  |
| 12. Characterization of products .....                                                        | 42  |
| 13. <sup>1</sup> H NMR, <sup>13</sup> C NMR and <sup>19</sup> F NMR spectra for products..... | 134 |
| 14. Reference .....                                                                           | 242 |

## 1. Materials and method

Commercial Ruthenium(III) chloride ( $\text{RuCl}_3$ , 97%, Bide Pharmatech). Commercial platinum-carbon catalyst (Pt/C, 20 wt%, Macklin). Commercial palladium-carbon catalyst (Pd/C, 10 wt%, Innochem). Commercial palladium(II) acetate catalyst ( $\text{Pd}(\text{OAc})_2$ , 99.95%, HWRK Chem). Unless otherwise stated, analytical grade solvents and commercially available reagents were used without further purification. All solvents were analytical reagents or better and were degassed prior to be used. The instrument for electrolysis is dual display potentiostat (DJS-292B) (made in China). The anode electrode is carbon felt (10 mm  $\times$  15 mm  $\times$  3.0 mm) and the cathode electrode is prepared N doped carbon felt supported Ru electrode (10 mm  $\times$  15 mm  $\times$  3.0 mm). Thin layer chromatography (TLC) employed glass 0.25 mm silica gel plates. Flash chromatography columns were packed with 200-300 mesh silica gel in petroleum ether (bp. 60–90 °C).

The surface morphologies were observed by transmission electron microscopy (TEM, JEOL plus-2100, Japan). Scanning transmission electron microscopy (STEM) imaging and energy-dispersive X-ray spectroscopy (EDX) mapping were acquired on a JEOL JEM-ARM200F microscope operated at 80 kV with a Schottky cold-field emission gun in Wuhan University. The EDX elemental mapping was carried using the JEOL SDD-detector with two 100 mm<sup>2</sup> X-ray sensor. X-ray photoelectron spectroscopy (XPS) was collected on a Thermo Scientific K-Alpha with a monochromatic Al K $\alpha$  X-ray source. The metal loading contents were determined using an inductively coupled plasma-optical emission spectrum (ICP-OES, Agilent 5110, USA). The crystal structure of the products was determined by powder X-ray diffraction (XRD, Smartlab SE, Japan). GC yields were recorded with a Shimadzu GC-2014 gas chromatograph instrument with an FID detector and biphenyl was added as an internal standard. <sup>1</sup>H and <sup>13</sup>C NMR data were recorded with Bruker Advanced II (400 MHz) spectrometers. All chemical shifts ( $\delta$ ) were reported in ppm and coupling constants ( $J$ ) in Hz. All chemical shifts are reported relative to *d*-solvent peaks (7.27 ppm for <sup>1</sup>H, 77.23 ppm for <sup>13</sup>C,  $\text{CDCl}_3$ ). High resolution mass spectra (HRMS) were measured with a Orbitrap Elite LTQ XL.

**Determination of deuterium incorporation.** The positions and percentage of deuterium incorporation were determined by <sup>1</sup>H NMR. The equation below was used to determine the degree of deuterium incorporation; peaks were calibrated against a signal corresponding to an unlabelled position. The labelling position was determined by <sup>1</sup>H NMR according to the chemical shifts and peak multiplicity. In addition, deuterium incorporations were confirmed using high-resolution MS

by comparison of all the labelled and unlabelled compounds (note that high-resolution MS serves here to substantiate the results of quantitative NMR analysis).

$$\% \text{ deuteration} = 100 - \left[ \left( \frac{\text{residual integral}}{\text{number of labelling sites}} \times 100 \right) \right]$$

## 2. Catalyst preparation

### Preparation of N/CF

About 330 mg carbon felt (CF, 30.0 mm × 20.0 mm × 3.0 mm) was reflux in EtOH with 660 mg melamine (MAM) for 24 h in a 50 mL PE tube equipped with reflux condenser to get MAM@CF. The resulted MAM@CF was washed twice with EtOH and dried at 80 °C. Then 2.90 g MAM was added into 12 mL DMSO in a 100 mL beaker, heated at 50 °C and stirred until melamine was fully dispersed in DMSO. Then 1.25 g paraformaldehyde and MAM@CF were added in turn. The obtained mixture was heat at 120 °C for 1 h and 170 °C for 72 h for polymerization. Then, the obtained solid was calcinated at 900 °C for 1 h under Ar atmosphere with heating rate of 4 °C/min to get N-doped carbon felt (N/CF). The prepared N/CF was cut into three pieces, the size of each piece was 10.0 mm × 20.0 mm × 3.0 mm.

### Preparation of Ru-N/CF

The prepared N/CF (10.0 mm × 20.0 mm × 3.0 mm) was immersed with 20 mM RuCl<sub>3</sub> in 12 mL H<sub>2</sub>O in a 50 mL PE tube for 24 h. Then impregnated RuCl<sub>3</sub>@N/CF was taken out, washed three times with H<sub>2</sub>O and was dried at 80 °C under vacuum. The dried RuCl<sub>3</sub>@N/CF was placed into a divided cell as cathode electrode with 0.08 M Et<sub>4</sub>NF in *t*BuOH/H<sub>2</sub>O cathode solution and CF was used as anode electrode with 0.08 M NaF in H<sub>2</sub>O anode solution for electrodeposition, which was operated at 10 mA for 3 h to obtain the electrode Ru-N/CF. Besides, the residual Ru-containing solution was recovery and could be reused.

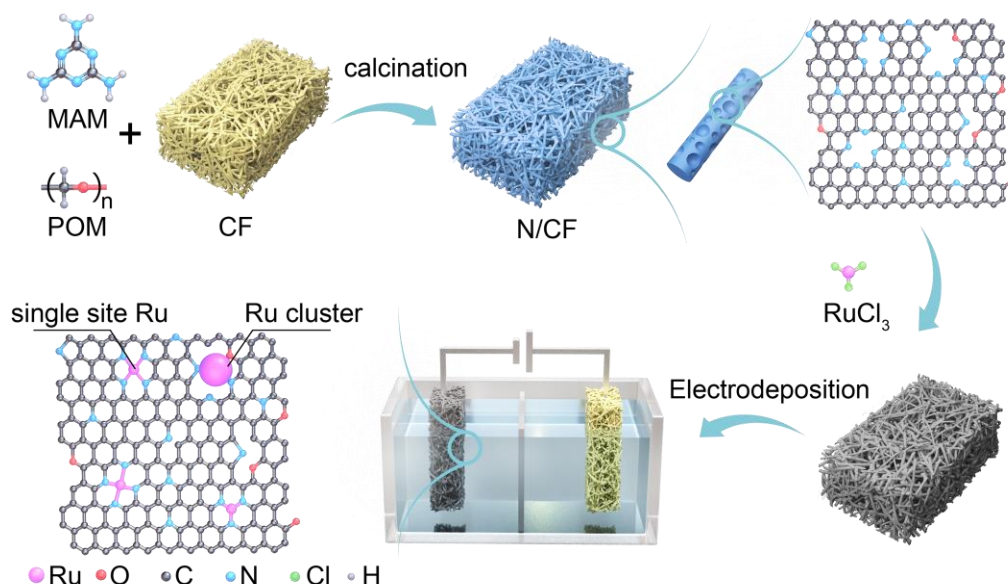

**Supplementary Figure S1.** Preparation of Ru-N/CF electrode.

### Preparation of Ru-N/CF used in electrochemical flow device

About 5.57 g carbon felt (CF, 135.0 mm × 75.0 mm × 3.0 mm) was reflux in EtOH with 11.14 g melamine (MAM) for 24 h to get MAM@CF. The resulted MAM@CF was washed twice with EtOH and dried at 80 °C. Then 48.95 g MAM was added into 200 mL DMSO in a water bath, heated at 50 °C and stirred until melamine was fully dispersed in DMSO. Then 21.13 g paraformaldehyde and MAM@CF were added in turn. The obtained mixture was heat at 120 °C for 1 h and 170 °C for 72 h for polymerization. Then, the obtained solid was calcinated at 900 °C for 1 h under Ar atmosphere with heating rate of 4 °C/min to get N-doped carbon felt (N/CF).

The prepared N/CF (135.0 mm × 75.0 mm × 3.0 mm) was immersed with 40 mM RuCl<sub>3</sub> in 230 mL H<sub>2</sub>O in a cuboid PE box for 24 h. Then impregnated RuCl<sub>3</sub>@N/CF was taken out, washed three times with H<sub>2</sub>O and was dried at 80 °C under vacuum. The dried RuCl<sub>3</sub>@N/CF was calcinated at 300 °C for 1 h under 10% H<sub>2</sub> atmosphere with heating rate of 2 °C/min to obtain electrode Ru-N/CF. Besides, the residual Ru-containing solution was recovery and could be reused.



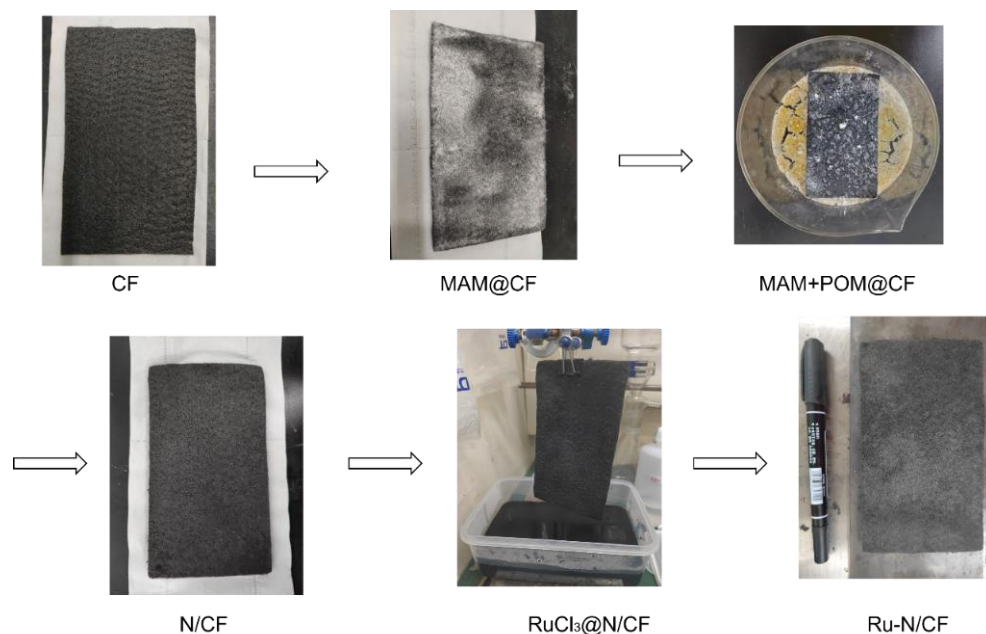

**Supplementary Figure S2.** Preparation of Ru-N/CF used in electrochemical flow device.

### 3. General procedure for the electro-reductive deuteration reactions

#### Method 1: Electro-reductive deuteration reactions in a divided cell

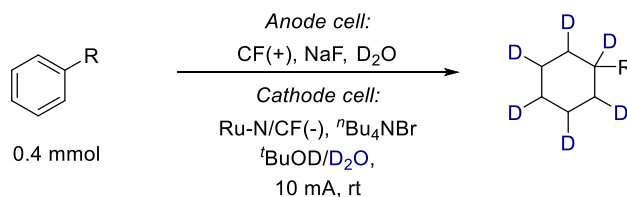

In an oven-dried divided cell, the arene (0.4 mmol, 1 equiv.) and <sup>t</sup>Bu<sub>4</sub>NBr (0.8 mmol) were placed in the cathode cell, and NaF (0.8 mmol) was placed in the anode cell. The cell was equipped with a stir bar, a carbon felt anode (10 mm × 15 mm × 3.0 mm) and N doped carbon felt supported Ru cathode (10 mm × 15 mm × 3.0 mm). The cell was flushed with Ar. Degased <sup>t</sup>BuOD (5.0 mL) and D<sub>2</sub>O (5.0 mL) were added in the cathode cell. D<sub>2</sub>O (10 mL) was added in the anode cell. The reaction mixture was stirred and electrolyzed at a constant current of 10 mA at room temperature until the reaction was complete monitored by TLC and GC-MS. The reaction time is generally between 8 h and 20 h. After completion of the reaction, the reaction mixture was extracted three times with ethyl acetate and the combined organic phase was removed under reduced pressure by an aspirator and dried by Na<sub>2</sub>SO<sub>4</sub>, then the pure product was obtained by flash column chromatography on silica gel.

## Method 2: Electro-reductive deuteration reactions in an undivided cell

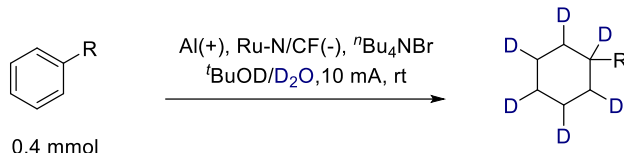

The arene (0.4 mmol, 1 equiv.) and  $t\text{Bu}_4\text{NBr}$  (0.4 mmol) were placed in an oven-dried undivided three-necked bottle (25 mL). The bottle was equipped with a stir bar, an aluminum sheet (10 mm  $\times$  15 mm  $\times$  0.3 mm) anode and N doped carbon felt supported Ru cathode (10 mm  $\times$  15 mm  $\times$  3.0 mm). The bottle was flushed with Ar. Degassed  $t\text{BuOD}$  (2.5 mL) and degassed  $\text{D}_2\text{O}$  (2.5 mL) were added. The reaction mixture was stirred and electrolyzed at a constant current of 10 mA at room temperature until the reaction was complete monitored by TLC and GC-MS. The reaction time is generally between 8 h and 20 h. After completion of the reaction, the reaction mixture was extracted three times with ethyl acetate and the combined organic phase was removed under reduced pressure by an aspirator, then the pure product was obtained by flash column chromatography on silica gel.

## Method 3: Electro-reductive deuteration reactions of polyfluoro arene compounds.

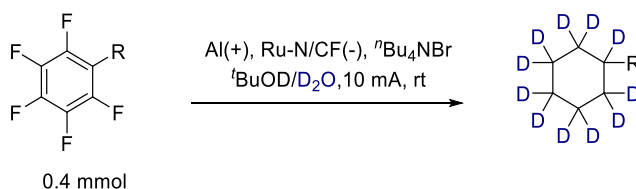

The arene (0.4 mmol, 1 equiv.) and  $t\text{Bu}_4\text{NBr}$  (0.8 mmol) were placed in an oven-dried undivided three-necked bottle (25 mL). The bottle was equipped with a stir bar, an aluminum sheet (10 mm  $\times$  15 mm  $\times$  0.3 mm) anode and N doped carbon felt supported Ru cathode (10 mm  $\times$  15 mm  $\times$  3.0 mm). The bottle was flushed with Ar. Degassed  $t\text{BuOD}$  (5.0 mL) and degassed  $\text{D}_2\text{O}$  (5.0 mL) were added. The reaction mixture was stirred and electrolyzed at a constant current of 10 mA at room temperature until the reaction was complete monitored by TLC and GC-MS. The reaction time is generally between 36 h and 48 h. After completion of the reaction, the reaction mixture was extracted three times with ethyl acetate and the combined organic phase was removed under reduced pressure by an aspirator, then the pure product was obtained by flash column chromatography on silica gel.

### Graphic guide for setting up electro-reductive deuteration reactions

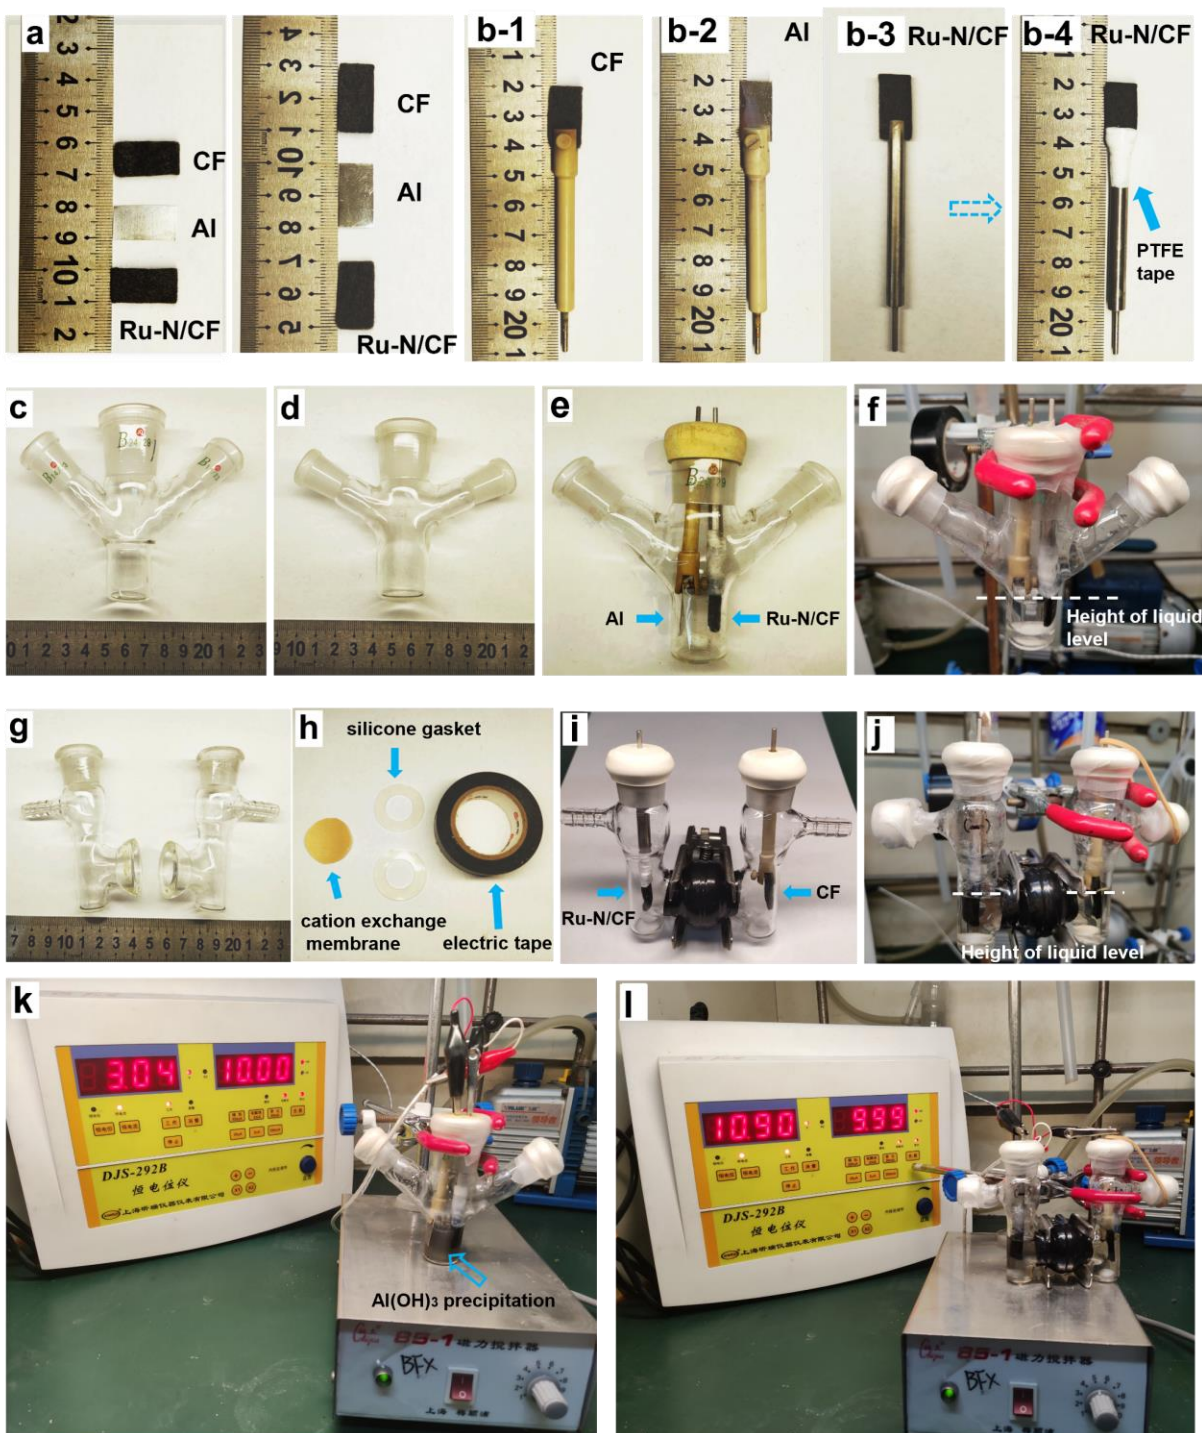

**Supplementary Figure S3. Images of electrochemical reaction devices.** (a) CF, Al sheet and Ru-N/CF electrodes and their original dimensions of length and width (1.0 cm \* 2.0 cm). (b) Assembly of electrodes and electrode clamps and the effective electrode area was 1.0 cm \* 1.5 cm. (c) Three-necked bottle used to hold 5 ml solvent. (d) Three-necked bottle used to hold 10 ml

solvent. (e) Assembly of electrodes and reaction bottle. (f) Setting up reaction in an undivided cell. (g) Divided cell. (h) Assembly accessories for divided cell. (i) Assembly of electrodes and divided cell. (j) Setting up reaction in a divided cell. (k) Connect the cathode and anode in an undivided cell to a DC power supply. (l) Connect the cathode and anode in a divided cell to a DC power supply.

#### 4. Reaction development and optimization

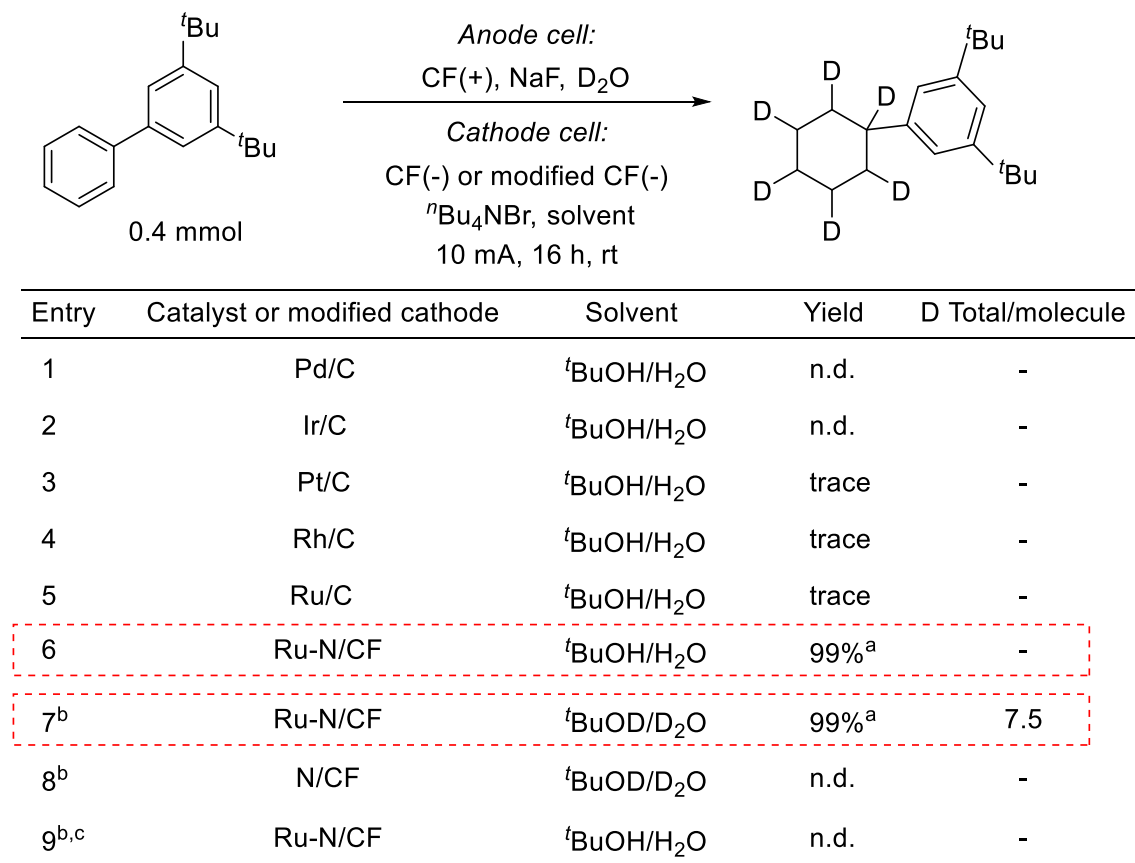

**Supplementary Table S1.** Reaction conditions: Anode cell, CF (+), NaF 0.8 mmol, H<sub>2</sub>O 10 mL; cathode cell, CF or modified cathode (-), arene 0.4 mmol, <sup>n</sup>Bu<sub>4</sub>NBr 0.8 mmol, *t*BuOH/H<sub>2</sub>O = 5/5 mL, 10 mA, 16 h, room temperature, Ar atmosphere. <sup>a</sup>Isolated yield. <sup>b</sup>t = 9 h. <sup>c</sup>Reaction was carried out without electrolysis under 1 atm H<sub>2</sub> atmosphere. n.d. = not detected.

## 5. Characterization of Ru-N/CF

In order to understand the detailed structure of the most active material (Ru-N/CF), characterization of modified cathode Ru-N/CF was performed with high-angle annular dark-field scanning transmission electron microscopy (HAADF-STEM), X-ray photoelectron spectroscopy (XPS), powder X-ray diffraction (XRD) and X-ray absorption spectroscopy (XAS). These results showed that the Ru species on freshly Ru-N/CF were supported as single atom/site and cluster and the ratio of  $\text{Ru}^{3+}/\text{Ru}^0$  was 0.73. The Ru species were partially reduced to  $\text{Ru}^0$  during reaction to form Ru nanoparticles with size of 1-5 nm and the ratio of  $\text{Ru}^{3+}/\text{Ru}^0$  was change to 0.09 after 5 cycle reaction, which indicated N/CF supported Ru nanoparticles might be the catalytic active species (for details see Supplementary Figures S4-8).

### TEM spectrums of Ru-N/CF

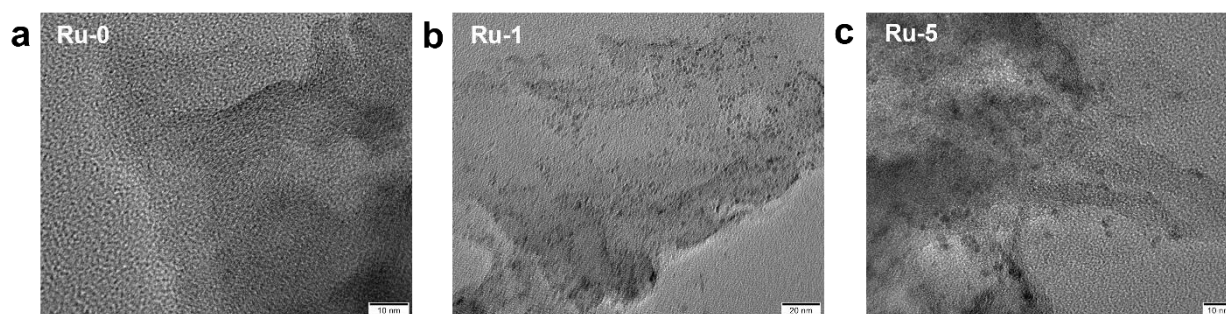

**Supplementary Figure S4.** (a) TEM spectrum of fresh Ru-N/CF. (b) TEM spectrum of Ru-N/CF after reaction. (c) TEM spectrum of Ru-N/CF after 5 cycle reactions.

The fresh Ru-N/CF was marked as Ru-0. The Ru-N/CF after 1 cycling was marked as Ru-1. The Ru-N/CF after 5 cycling was marked as Ru-5.

TEM spectrum of Ru-0 showed that none of nanoparticles was observed (Supplementary Figure S4a). TEM spectrum of Ru-1 showed that many nanoparticles were formed and the size of nanoparticles was about 2 nm after reaction (Supplementary Figure S4b). TEM spectrum of Ru-5 showed that a slight agglomeration of nano particles was observed after 5 cycling reactions (Supplementary Figure S4c).



### STEM and EDS mapping spectrums of Ru-N/CF

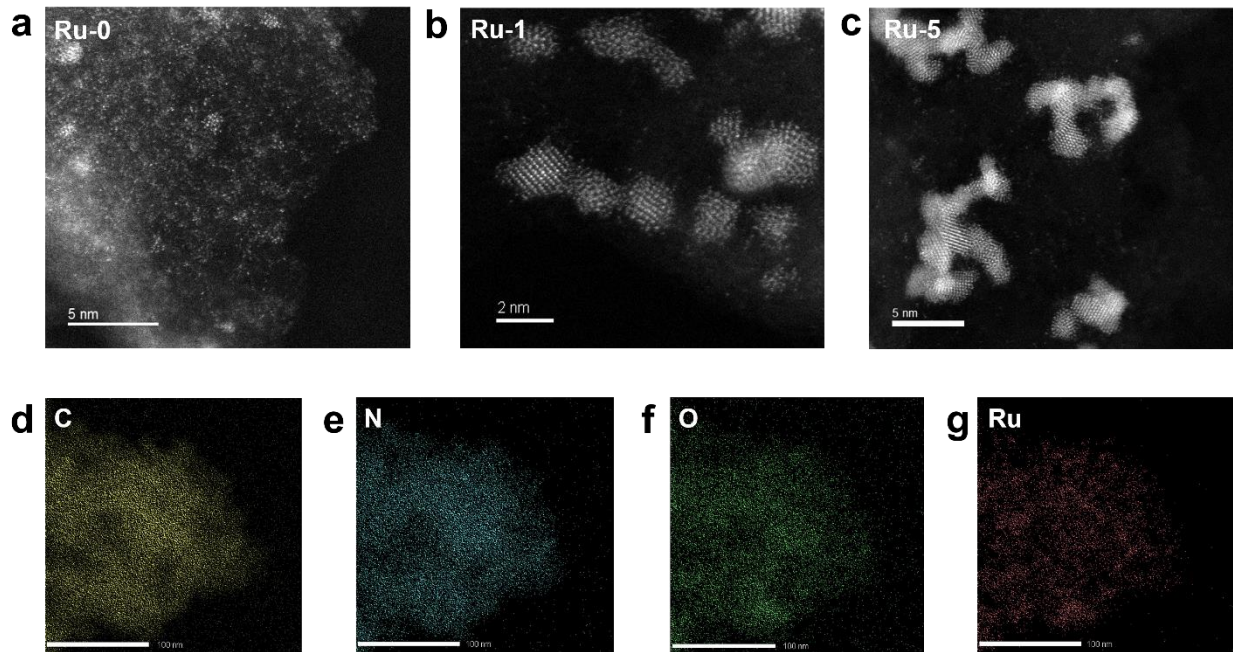

**Supplementary Figure S5.** (a) STEM spectrum of fresh Ru-N/CF. (b) STEM spectrum of Ru-N/CF after reaction. (c) STEM spectrum of Ru-N/CF after 5 cycle reactions. (d-g) EDS mapping spectrum of Ru-N/CF after reaction.

STEM spectrum of Ru-0 showed that Ru species were mainly dispersed on the carrier in the form of single atom/site (Supplementary Figure S5a). Besides, there were a few Ru clusters and the size was  $< 1$  nm. STEM spectrum of Ru-1 showed that many nanoparticles with the size of around 2 nm were formed after electroreduction (Supplementary Figure S5b). STEM spectrum of Ru-5 showed that nanoparticles were agglomerated to a certain extent and the size was around 5 nm after 5 cycle reactions (Supplementary Figure S5c).

EDS mapping spectrum of Ru-1 showed that there were C, N, O and Ru elements on the electrode and all of these elements were dispersed randomly (Supplementary Figure S5d-g).

## XPS spectra of Ru-N/CF.

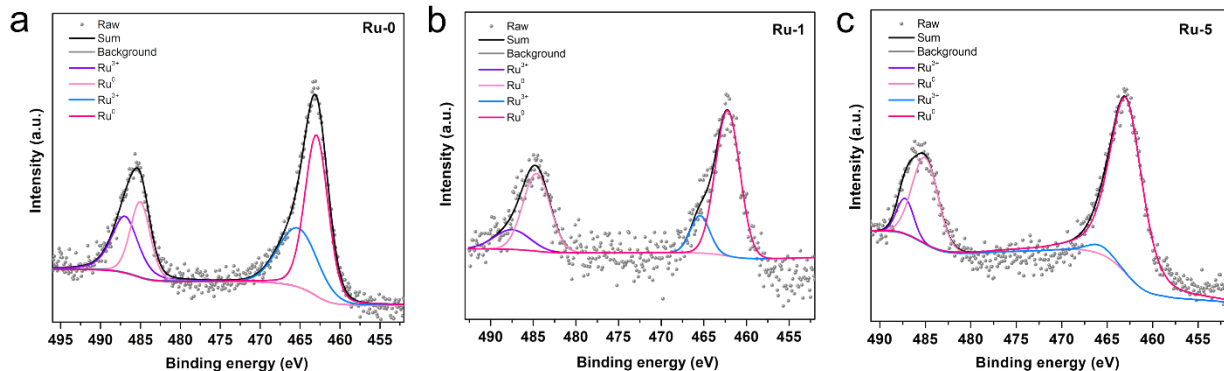

**Supplementary Figure S6.** Ru 3p XPS spectra of (a) fresh Ru-N/CF, (b) Ru-N/CF after reaction, (c) Ru-N/CF after 5 cycle reactions.

XPS analysis of fresh Ru-N/CF showed that both  $\text{Ru}^{3+}$  and  $\text{Ru}^0$  existed on the surface of the electrode and the ratio of  $\text{Ru}^{3+}/\text{Ru}^0$  was 0.73 (Supplementary Figure S6a). XPS spectrum of Ru-N/CF after reaction showed that both  $\text{Ru}^{3+}$  and  $\text{Ru}^0$  existed and the ratio of  $\text{Ru}^{3+}/\text{Ru}^0$  was 0.25 (Supplementary Figure S6b). XPS analysis of Ru-N/CF after 5 cycle reactions showed that both  $\text{Ru}^{3+}$  and  $\text{Ru}^0$  existed and the ratio of  $\text{Ru}^{3+}/\text{Ru}^0$  was 0.09 (Supplementary Figure S6c). Above results indicated that as the reaction proceeded, the ratio of  $\text{Ru}^0$  species increased. The reaction yield and D-incorporation were not decreased for 6<sup>th</sup> cycle reaction catalyzed by Ru-5 (Supplementary Figure S10), which might indicate the  $\text{Ru}^0$  was the active specie for reductive deuteration of arene in consideration that the ratio of  $\text{Ru}^{3+}/\text{Ru}^0$  was 0.09 for Ru-5.

### XRD spectra of Ru-N/CF.

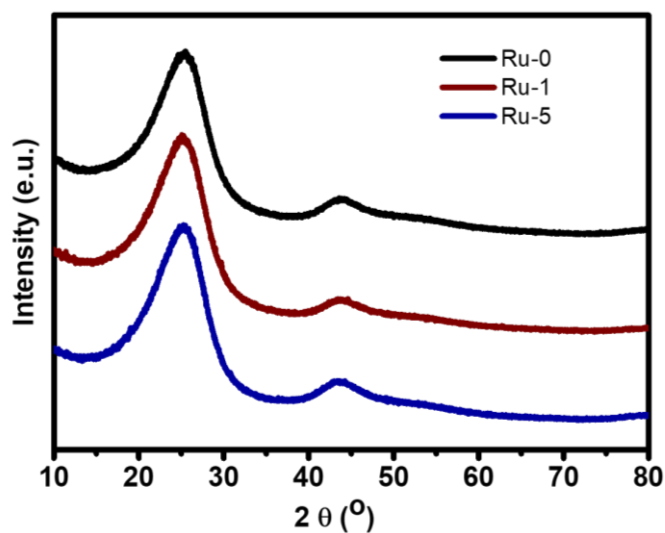

**Supplementary Figure S7.** XRD spectra of fresh Ru-N/CF, Ru-N/CF after reaction and Ru-N/CF after 5 cycle reactions.

XRD spectra showed that no peak of Ru NPs was detected.

### ICP result

The mass of the electrode Ru-N/CF ( $10\text{ mm} \times 15\text{ mm} \times 3.0\text{ mm}$ ) was 117 mg. Besides, ICP analysis of Ru-N/CF showed that the loading of Ru was 1.0 wt%.



## XANES and EXAFS spectra of Ru-N/CF.

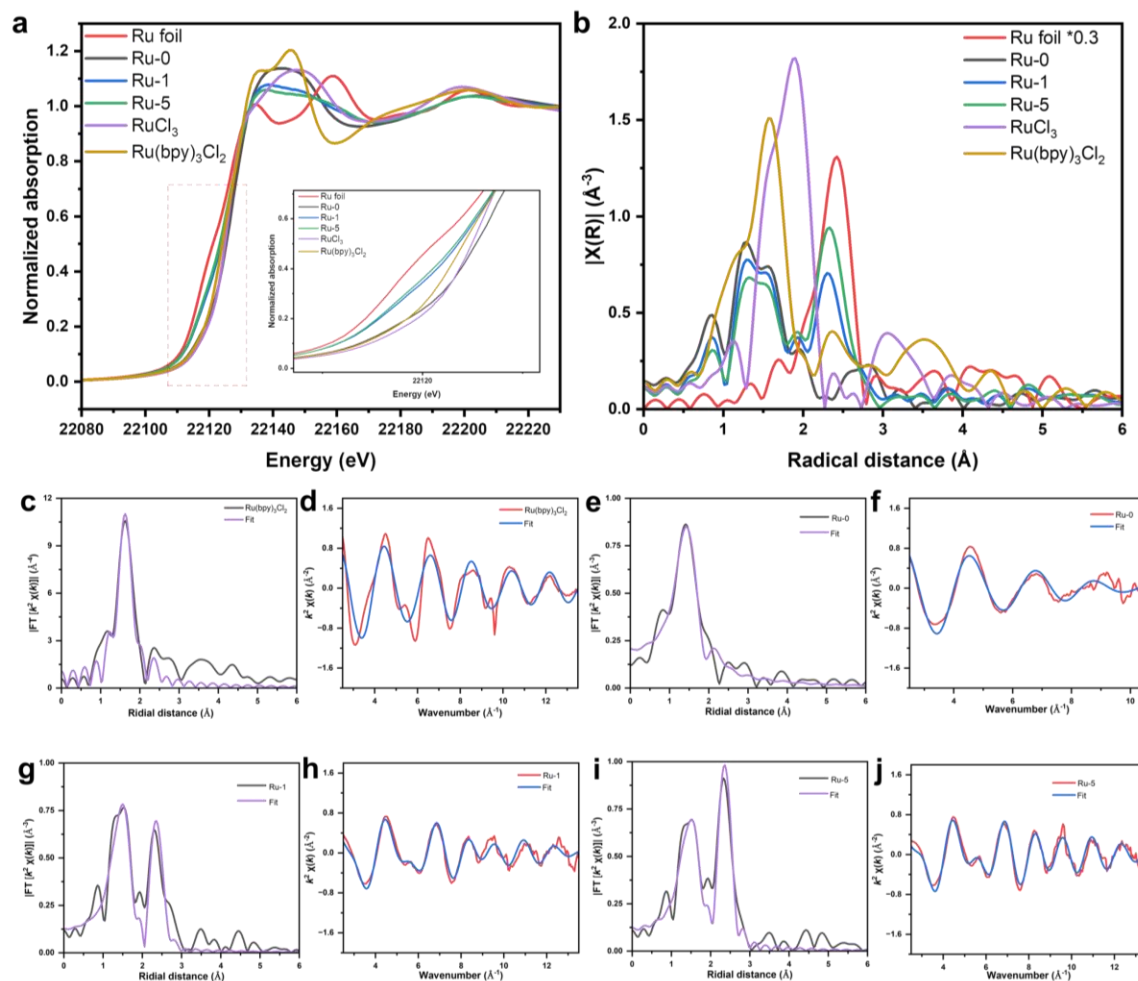

**Supplementary Figure S8.** (a) XANES, (b) EXAFS spectrum of Ru-N/CF with respect to the reference samples. Fitting data of (c, d) standard sample  $\text{Ru}(\text{bpy})_3\text{Cl}_2$ , (e, f) Ru-0 electrode, (g, h) Ru-1 electrode and (i, j) Ru-5 electrode.

XANES spectrum of fresh Ru-N/CF (Ru-0) showed that the edge energy of Ru on the fresh Ru-N/CF was higher than that of  $\text{Ru}(\text{bpy})_3\text{Cl}_2$  and close to that of  $\text{RuCl}_3$ , which was consistent with XPS results. XANES analysis of Ru-1 and Ru-5 indicated that the average valence of Ru species on the Ru-1 and Ru-5 were both between  $\text{Ru}^0$  and  $\text{Ru}^{2+}$ . EXAFS analysis of Ru-0 showed that Ru-Ru bond was hardly observed and the Ru species on the Ru-0 mainly existed in the form of single site. EXAFS analysis of Ru-1 and Ru-5 showed that there were both Ru-Ru bond and Ru-N/O or Ru-Cl bond, which indicated that both Ru NPs and single site Ru were existed on the Ru-1 and Ru-5.

| Sample                               | Path   | Amp         | CN       | DW factor ( $\text{\AA}^2$ ) | deltaE (eV) | R ( $\text{\AA}$ ) | k-range ( $\text{\AA}^{-1}$ ) | R-range ( $\text{\AA}$ ) | R factor |
|--------------------------------------|--------|-------------|----------|------------------------------|-------------|--------------------|-------------------------------|--------------------------|----------|
| Ru(bpy) <sub>3</sub> Cl <sub>2</sub> | Ru-N   | 0.84(8)     | <u>6</u> | 0.0018 (9)                   | 1.1 (5)     | 2.062 (6)          | 3.0 - 13.5                    | 1.1 - 2.1                | 0.042    |
| Ru-0                                 | Ru-N/O | <u>0.84</u> | 6.2 (6)  | 0.010 (3)                    | -2.0 (7)    | 2.017 (8)          | 3.0 - 10.0                    | 1.1 - 1.9                | 0.00368  |
| Ru-1                                 | Ru-N/O | <u>0.84</u> | 4.2 (7)  | 0.006 (1)                    | -4.6 (6)    | 1.997 (4)          | 3.0 - 13.5                    | 1.0 - 3.0                | 0.071    |
|                                      | Ru-Ru  |             | 2.7 (7)  | 0.007 (1)                    |             | 2.674 (5)          |                               |                          |          |
| Ru-5                                 | Ru-N/O | <u>0.84</u> | 4.0 (9)  | 0.007 (2)                    | -4.8 (5)    | 2.00 (1)           | 3.0 - 13.5                    | 1.0 - 3.0                | 0.043    |
|                                      | Ru-Ru  |             | 3.5 (7)  | 0.006 (2)                    |             | 2.672 (9)          |                               |                          |          |

**Supplementary Table S2.** EXAFS Fitting results. Amp = Amplitude reduction factor, DW = Debye-Waller factor, numbers in parentheses are fitting errors, numbers underline are fixed values in fitting.

## 6. $^1\text{H}$ NMR and HRMS spectrum analysis of selected examples

### a-1. Cyclohexyl formamide.

The  $^1\text{H}$  NMR spectrum and  $^1\text{H}$ ,  $^1\text{H}$  COSY spectrum of cyclohexyl formamide were shown as follows. The chemical shift of two active H on  $-\text{NH}_2$  was 5.60 ppm. The chemical shift of the hydrogen on the  $\alpha$  position of amide was 2.14 ppm and the H was marked as **H1**. It could be obtained from  $^1\text{H}$ ,  $^1\text{H}$  COSY spectrum, the **H1** was correlated with the hydrogens at 1.90 and 1.42 ppm chemical shifts (marked as **H2** and **H3**, respectively). Thus, **H2** and **H3** were the hydrogens on the  $\beta$  site of amide. Based on the same principle, **H4** and **H5** were the hydrogens on the  $\gamma$  site of amide. **H6** and **H7** were the hydrogens on the  $\delta$  site of amide. However, **H4** and **H7** were difficult to be distinguished from  $^1\text{H}$  NMR (400 MHz) and  $^1\text{H}$ ,  $^1\text{H}$  COSY spectrum.

Then  $^1\text{H}$  NMR (800 MHz) spectrum of cyclohexyl formamide was tested to distinguish **H4** and **H7**. The integral number of the hydrogen peak at 1.29 ppm was 2, and the integral number of the hydrogen peak at 1.23 ppm was 1. Thus, the hydrogen peak at 1.29 ppm corresponded to **H4** and the hydrogen peak at 1.23 ppm corresponded to **H7**.

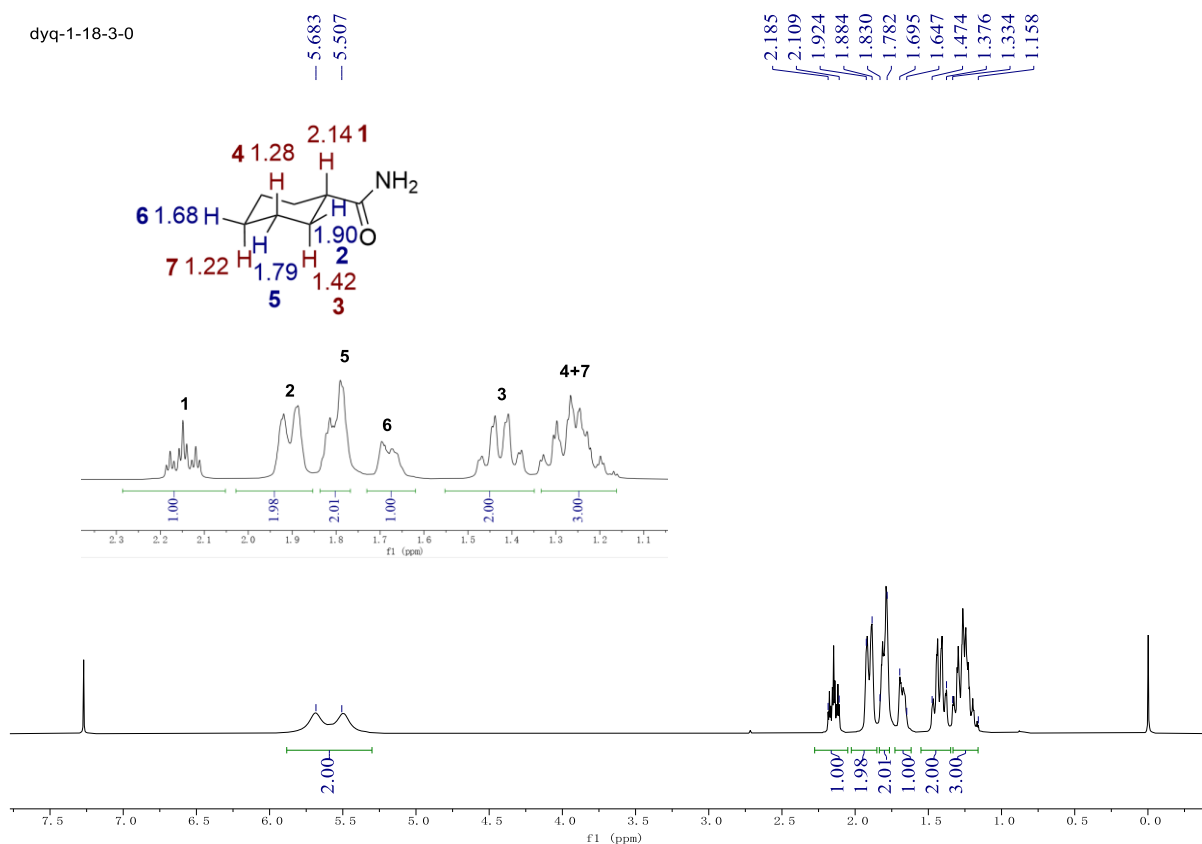

dyq-1-18-3-0

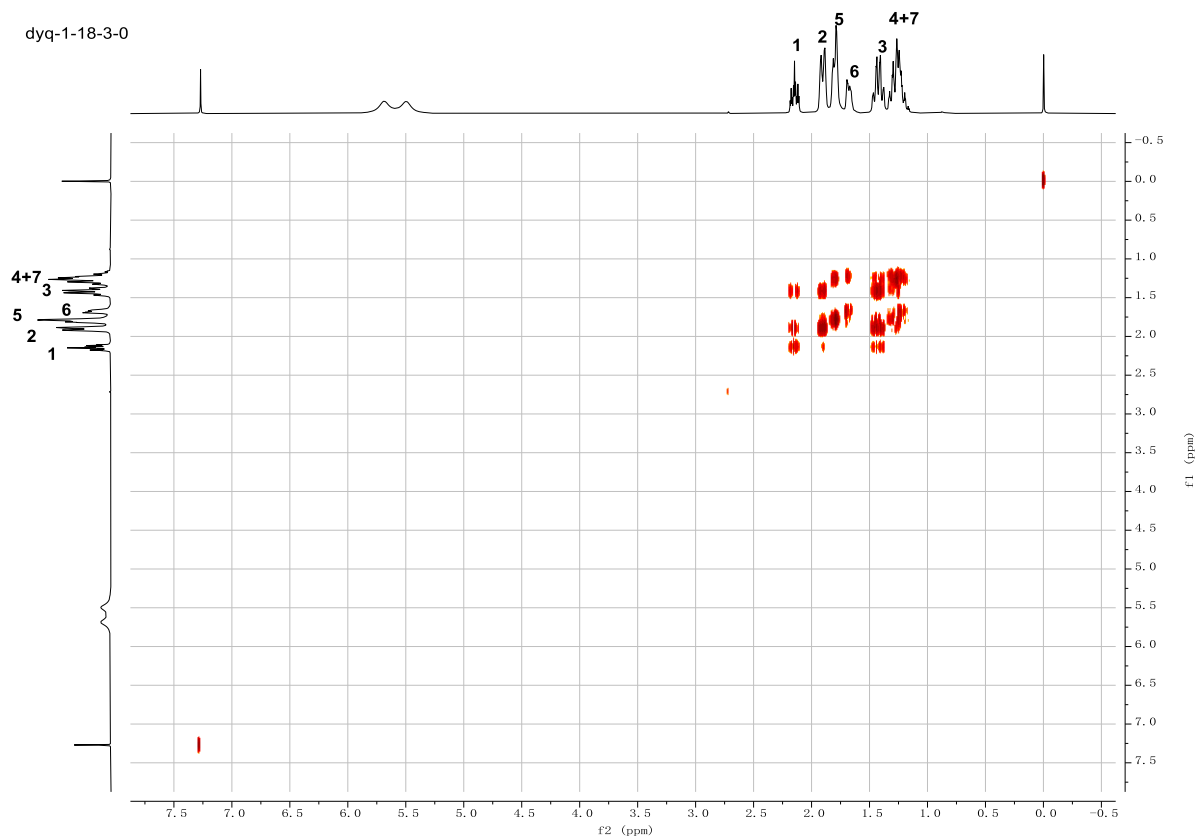

lelaiwen-00006 (d-18-3-H)  
800 MHz

5.584  
5.480

2.148  
1.908  
1.796  
1.685  
1.434  
1.285  
1.232

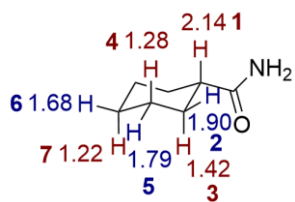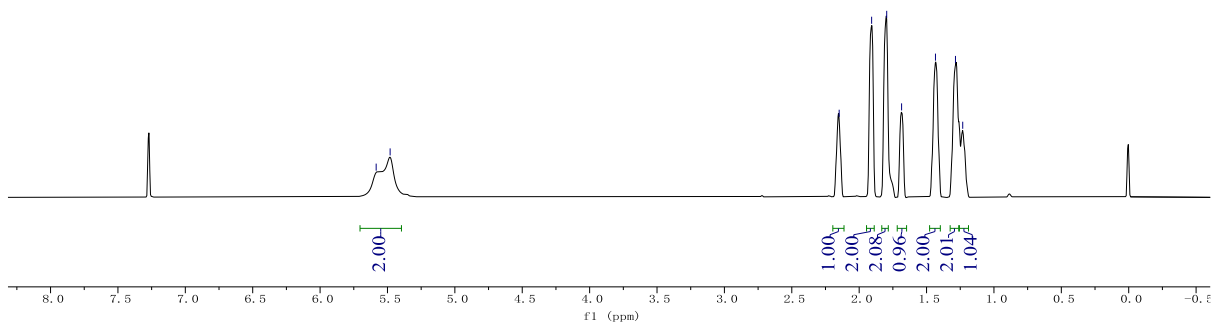

## a-2. Cyclohexyl formamide-*d*<sub>6</sub>

Based on above analytic results in a-1. The spectrum of electrochemical reductive deuteration product, cyclohexyl formamide-*d*<sub>6</sub>, was analyzed as follows. The hydrogen peak at 5.49 ppm corresponded to active hydrogen of amide and was integrated into 2. The hydrogen peak at 2.13 ppm corresponded to **H1** which was at α position of amide. The D-incorporation of this site was  $(1-0.11)/1 * 100\% = 89\%$ . The hydrogen peak at 1.89 ppm corresponded to **H2** which was at β position of amide. The D-incorporation of this site was  $(2-0.19)/2 * 100\% = 91\%$ . The hydrogen peak at 1.78 ppm corresponded to **H5** which was at γ position of amide. The D-incorporation of this site was  $(2-1.22)/2 * 100\% = 39\%$ . The hydrogen peak at 1.64 ppm corresponded to **H6** which was at δ position of amide. The D-incorporation of this site was  $(1-0.21)/1 * 100\% = 79\%$ . The hydrogen peak at 1.39 ppm corresponded to **H3** which was at β position of amide. The D-incorporation of this site was  $(2-1.32)/2 * 100\% = 34\%$ . The hydrogen peak at 1.26 ppm corresponded to **H4** which was at γ position of amide. The D-incorporation of this site was  $(2-0.92)/2 * 100\% = 54\%$ . The hydrogen peak at 1.19 ppm corresponded to **H7** which was at δ position of amide. The D-incorporation of this site was  $(1-0.64)/1 * 36\% = 64\%$ .

Thus, the D-incorporation of α site of amide was 89%. The total D-incorporation of β site of amide was 125%. The total D-incorporation of γ site of amide was 93%. The total D-incorporation of δ site of amide was 115%.

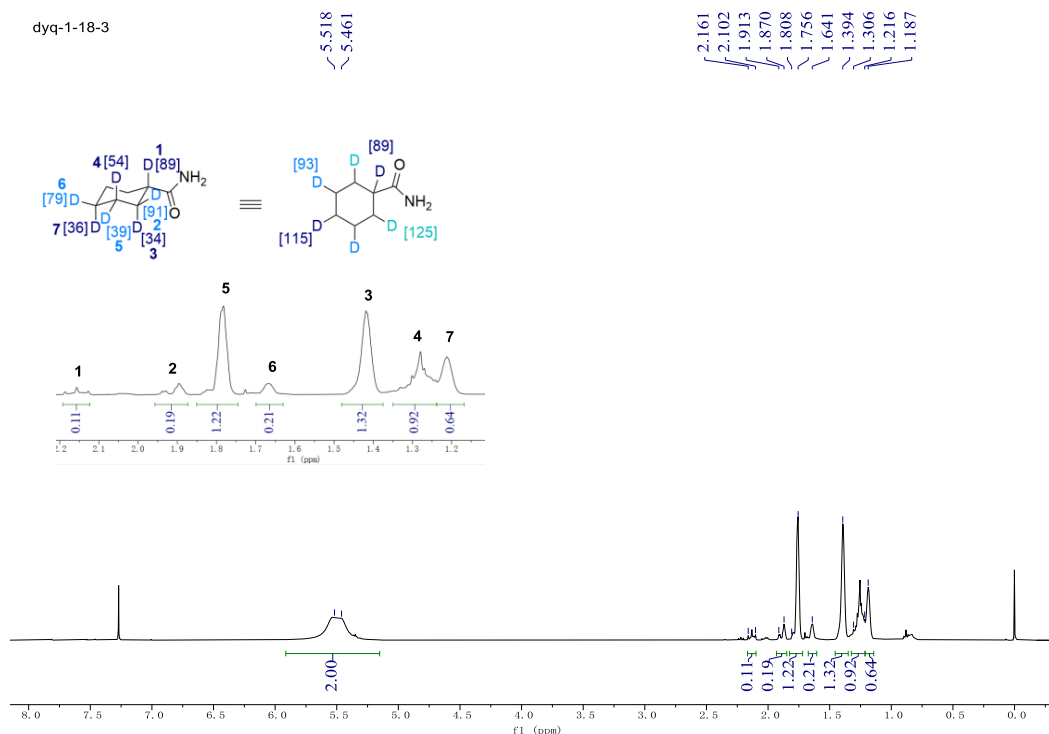

### a-3. HRMS analysis of Cyclohexyl formamide-*d*<sub>6</sub>

The full HRMS spectrum of D-labeled cyclohexyl formamide was as follows.

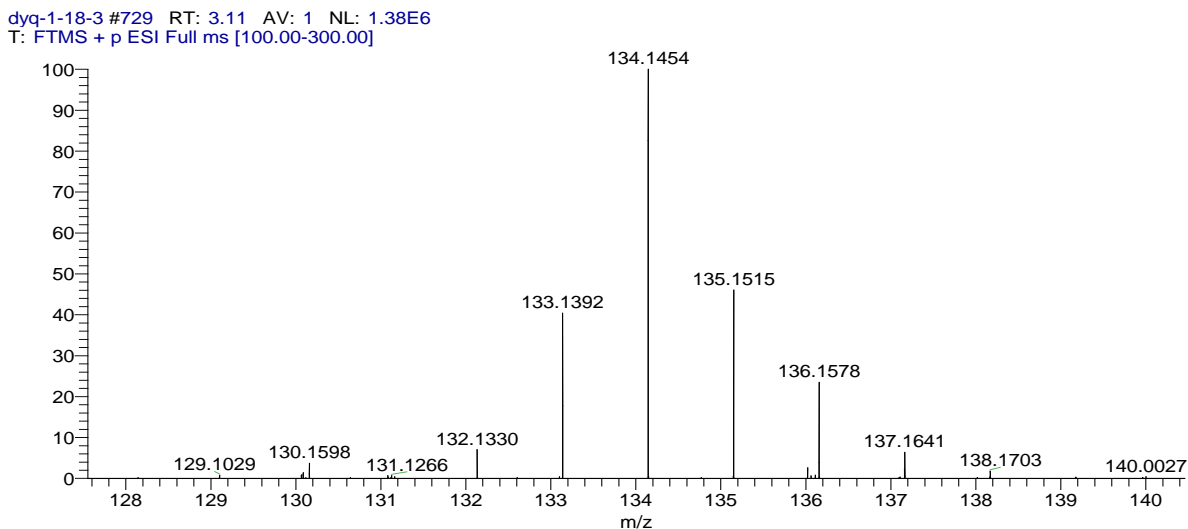

Any compound with definite element composition, including deuterium element, has exact mass and isotope masses. For example, the exact HRMS mass of cyclohexyl formamide labeled with 5 deuterium atoms ( $C_7H_8D_5NO + H$ , marked as **amide-*d*<sub>5</sub>**) is 133.1384 and the main isotope mass of that is 134.1417 (see below figure). And the exact HRMS mass of cyclohexyl formamide labeled with 6 deuterium atoms ( $C_7H_7D_6NO + H$ , marked as **amide-*d*<sub>6</sub>**) is 134.1447 and the main isotope mass of that is 135.1480.

The main isotope mass of **amide-*d*<sub>5</sub>** was close to exact mass of **amide-*d*<sub>6</sub>**, which must be considerate and distinguished for calculating D-incorporation.

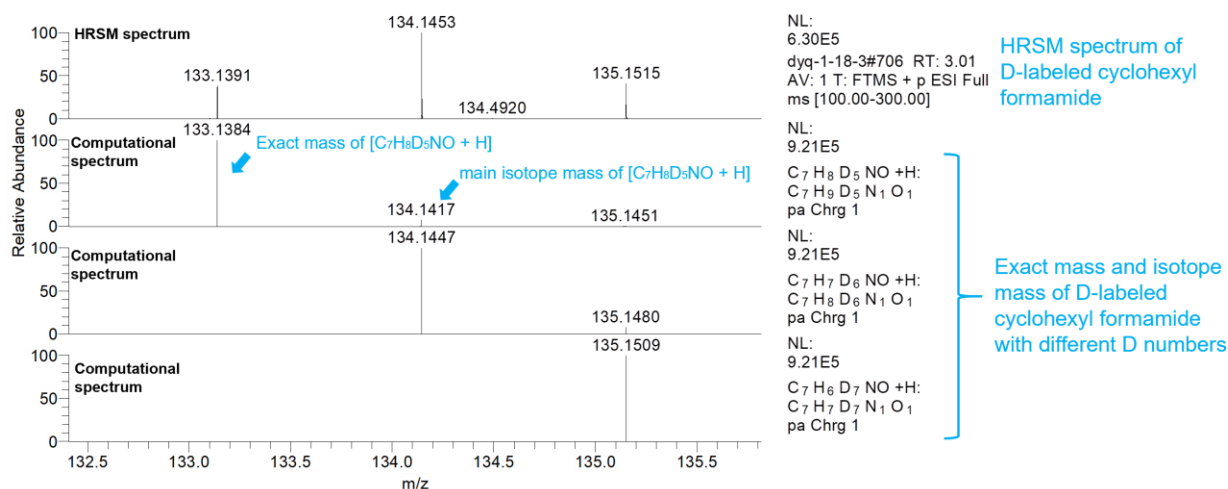

By using the HRMS device Orbitrap Elite LTQ XL and setting some parameters, the isotope mass peak of **amide-*d*<sub>n-1</sub>** and exact mass peak of **amide-*d*<sub>n</sub>** could be distinguished. For example,

the isotope mass peak of **amide-*d*<sub>5</sub>** (mass peak of 134.1429) and exact mass peak of **amide-*d*<sub>6</sub>** (mass peak of 134.1453) could be distinguished (see below figures). And the isotope mass peak of **amide-*d*<sub>6</sub>** (mass peak of 135.1488) and exact mass peak of **amide-*d*<sub>7</sub>** (mass peak of 135.1515) could be distinguished.

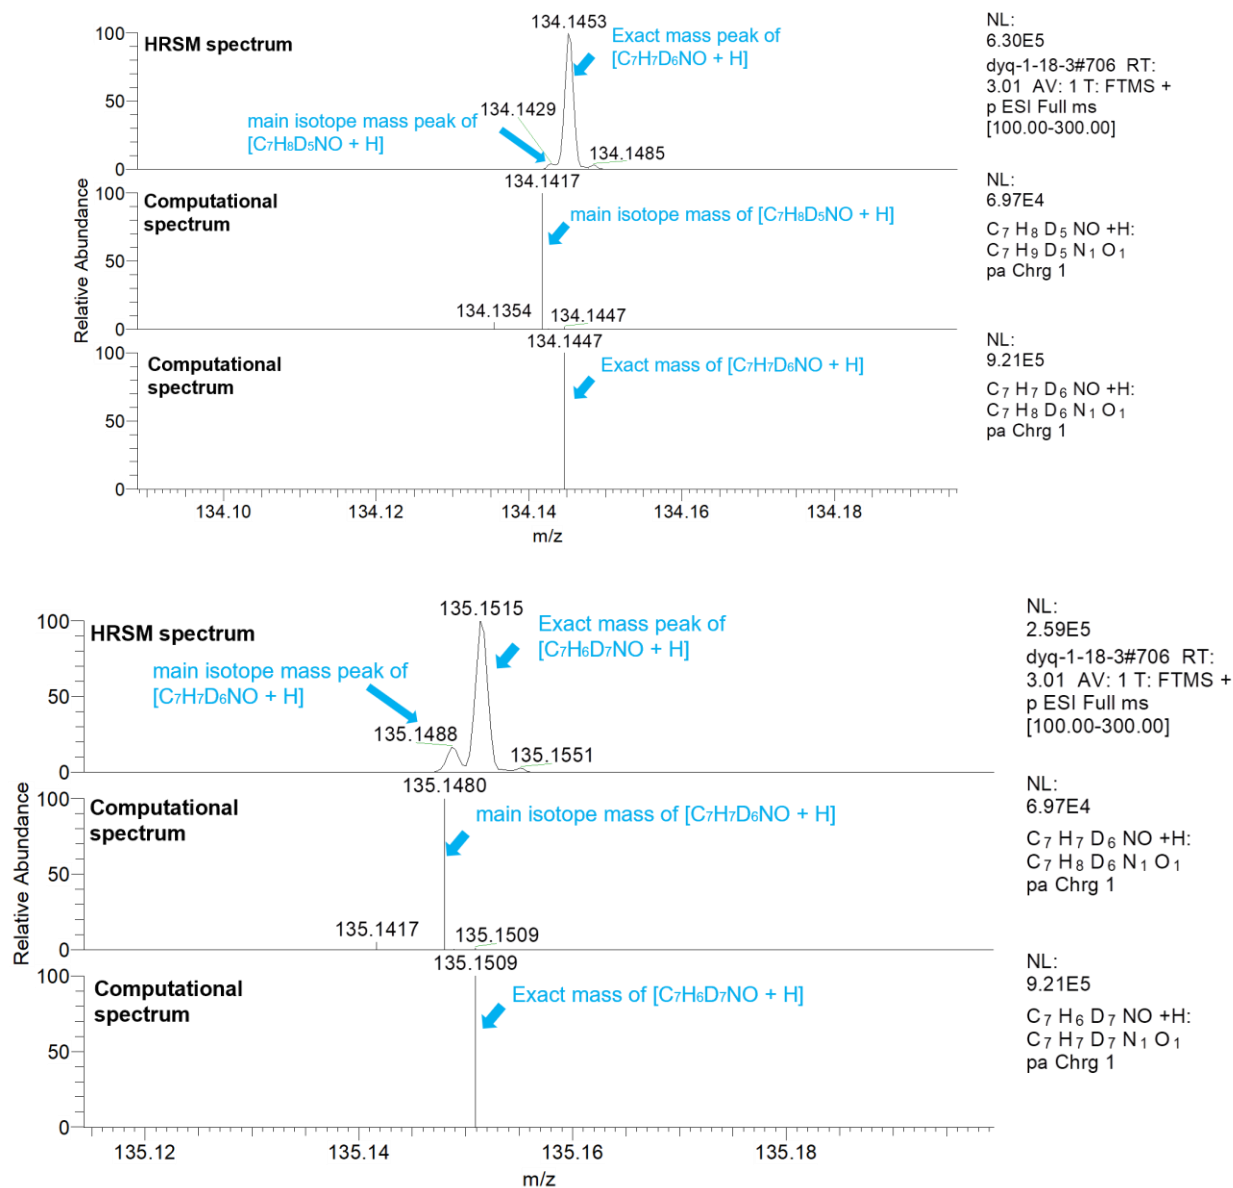

Thus, calculation of total D number could directly use exact mass peak areas of different D number labeled cyclohexyl formamide. And the calculated formula was as follows. ( $n$  represents the D number,  $A_n$  represents the exact mass peak area of **amide-*d*<sub>n</sub>**,  $R_n$  represents the proportion of exact mass peak area of **amide-*d*<sub>n</sub>**)

$$\text{Total D number} = \frac{A_1 * 1 + A_2 * 2 + A_3 * 3 + \dots + A_n * n}{A_1 + A_2 + A_3 + \dots + A_n}$$

$$= R_1 * 1 + R_2 * 2 + R_3 * 3 + \dots + R_n * n$$

The proportion area of various mass peak was shown as follows.

dyq-1-18-3 #729 RT: 3.11 AV: 1 NL: 1.38E6  
T: FTMS + p ESI Full ms [100.00-300.00]

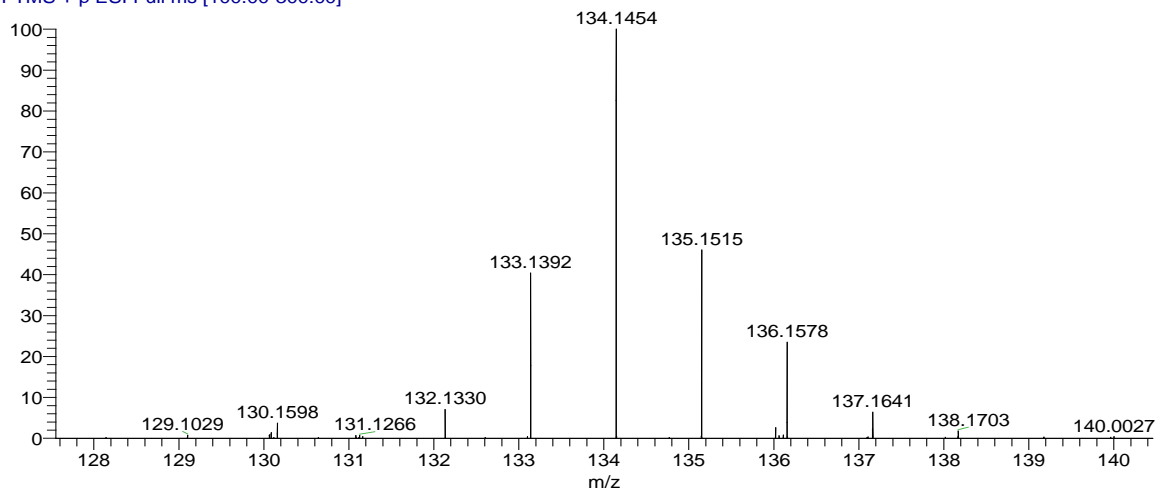

132.1328 ( $C_7H_9D_4NO + H^+$ , 3%), 133.1391 ( $C_7H_8D_5NO + H^+$ , 18%), 134.1453 ( $C_7H_7D_6NO + H^+$ , 47%), 135.1515 ( $C_7H_6D_7NO + H^+$ , 20%), 136.1578 ( $C_7H_5D_8NO + H^+$ , 9%), 137.1641 ( $C_7H_4D_9NO + H^+$ , 3%), 138.1704 ( $C_7H_3D_{10}NO + H^+$ , 1%).

Thus, the total number of D-labeled cyclohexyl formamide was = 6.3/molecule.

### b-1. *N*-Cyclohexylacetamide.

The  $^1H$  NMR spectrum and  $^1H$ ,  $^1H$  COSY spectrum of *N*-cyclohexylacetamide were shown as follows. The chemical shift of active H on -NHAc was 5.93 ppm. The chemical shift of the hydrogen on the  $\alpha$  position of amine was 3.68 ppm and the H was marked as **H1**. It could be obtained from  $^1H$ ,  $^1H$  COSY spectrum that the **H1** was correlated with the hydrogens at 1.85 and 1.09 ppm chemical shifts (marked as **H2** and **H3**, respectively). Thus, **H2** and **H3** were the hydrogens on the  $\beta$  site of amine. Based on the same principle, **H4** and **H5** were the hydrogens on the  $\gamma$  site of amine. **H6** and **H7** were the hydrogens on the  $\delta$  site of amine. However, **H3** and **H7** were difficult to distinguish from  $^1H$  NMR (400 MHz) and  $^1H$ ,  $^1H$  COSY spectrum.



dyq-1-24-1

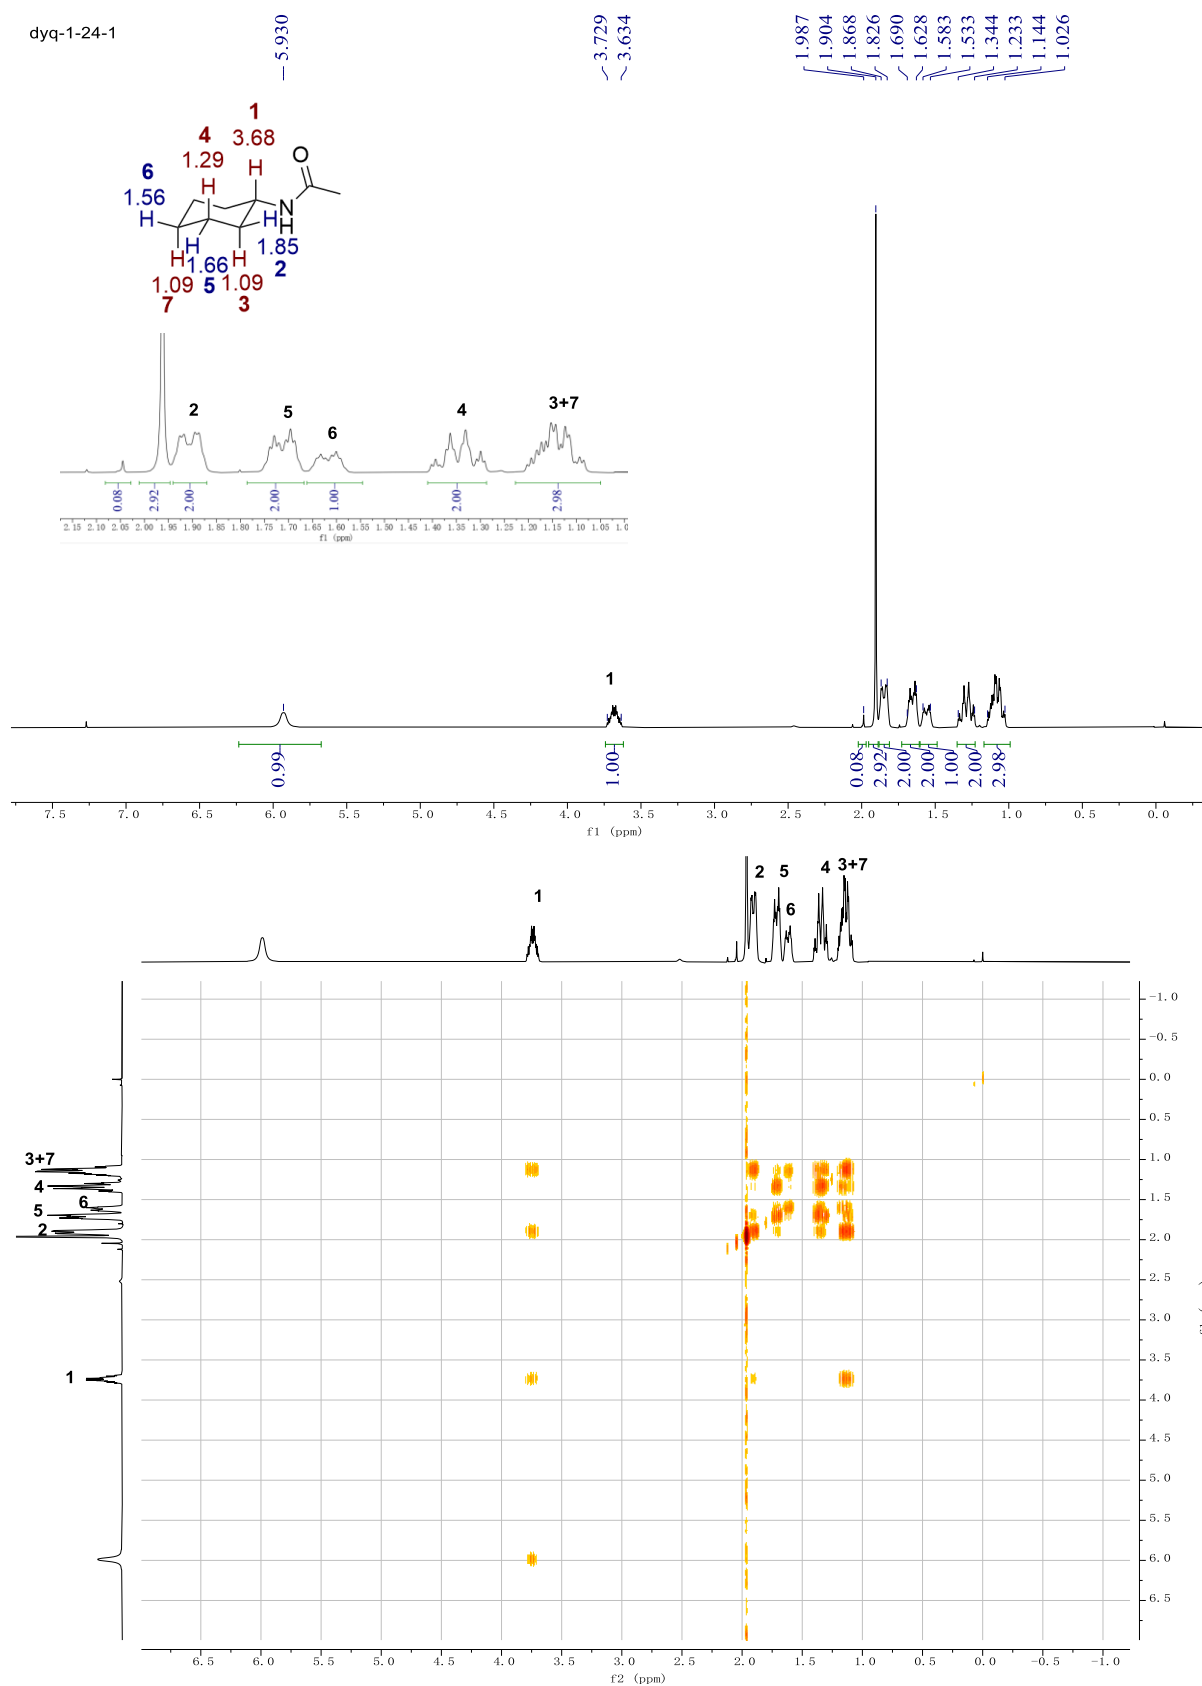

## b-2. *N*-Cyclohexylacetamide-*d*<sub>7</sub>.

Based on above analytic results in b-1. The spectrum of electrochemical reductive deuteration product, *N*-cyclohexylacetamide-*d*<sub>7</sub>, was analyzed as follows. The hydrogen peak at 5.60 ppm corresponded to active hydrogen of amide and was integrated into 1. The hydrogen peak at 3.71 ppm corresponded to **H1** which was at α position of amide. The D-incorporation of this site was  $(1-0.11)/1 * 100\% = 89\%$ . The hydrogen peak at 1.89-1.84 ppm corresponded to **H2** which was at β position of amide. The D-incorporation of this site was  $(2-0.33)/2 * 100\% = 84\%$ . The hydrogen peak at 1.69-1.64 ppm corresponded to **H5** which was at γ position of amide. The D-incorporation of this site was  $(2-1.05)/2 * 100\% = 48\%$ . The hydrogen peak at 1.59-1.55 ppm corresponded to **H6** which was at δ position of amide. The D-incorporation of this site was  $(1-0.31)/1 * 100\% = 69\%$ . The hydrogen peak at 1.32-1.23 ppm corresponded to **H4** which was at γ position of amide. The D-incorporation of this site was  $(2-0.54)/2 * 100\% = 73\%$ . The hydrogen peak at 1.09-1.05 ppm corresponded to **H3** and **H7** which were at β and δ position of amide. The average D-incorporation of these sites was  $(3-1.71)/3 * 100\% = 43\%$ .

Thus, the D-incorporation of α site of amide was 89%. The total average D-incorporation of β and δ sites of amide was  $(84*2 + 43*3 + 69)/3 = 122\%$ . The total D-incorporation of γ site of amide was 121%.

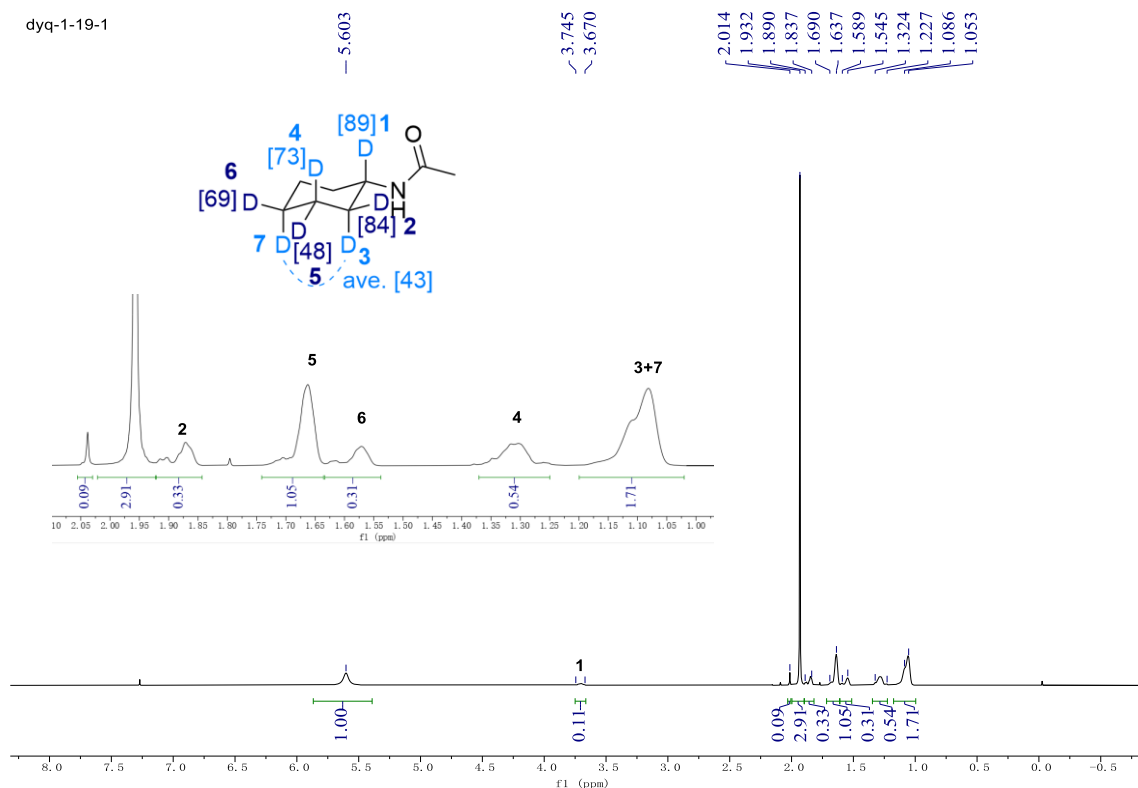

### c-1. 1-Cyclohexyl-3,5-dimethoxybenzene.

The  $^1\text{H}$  NMR spectrum and  $^1\text{H}$ ,  $^1\text{H}$  COSY spectrum of 1-cyclohexyl-3,5-dimethoxybenzene were shown as follows. The chemical shift of the hydrogen on the  $\alpha$  position of aromatic ring was 2.46 ppm and the H was marked as **H1**. It could be obtained from  $^1\text{H}$ ,  $^1\text{H}$  COSY spectrum that the **H1** was correlated with the hydrogens at 1.87 and 1.40 ppm chemical shifts (marked as **H2** and **H3**, respectively). The integral numbers of hydrogen peaks at 1.87 and 1.40 ppm were 4 and 4, respectively. Besides, the integral numbers of hydrogen peaks at 1.76 and 1.27 ppm were 1 and 1, respectively. Thus, chemical shifts of the hydrogens at  $\gamma$  site of aromatic ring (**H4**, **H5**) were also 1.87 and 1.40 ppm. Chemical shifts of the hydrogens at  $\delta$  site of aromatic ring (**H6**, **H7**) were 1.76 and 1.27 ppm.

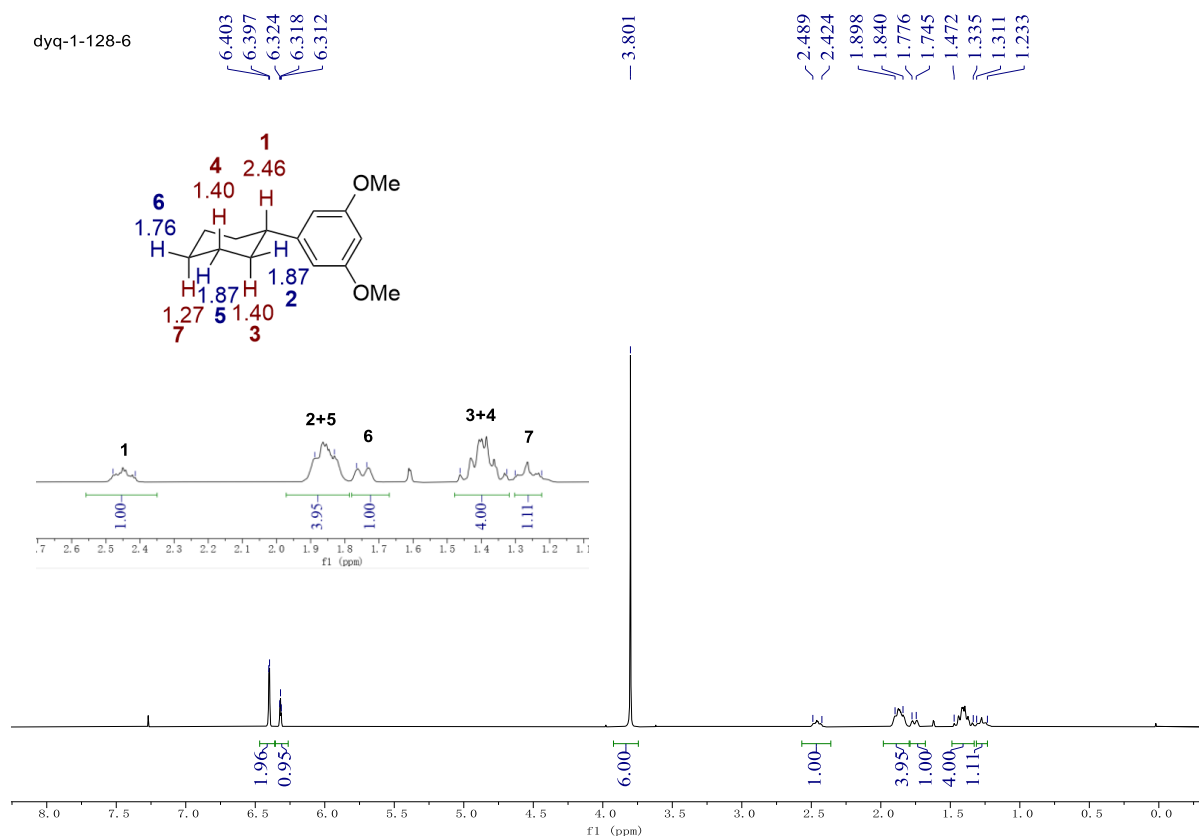

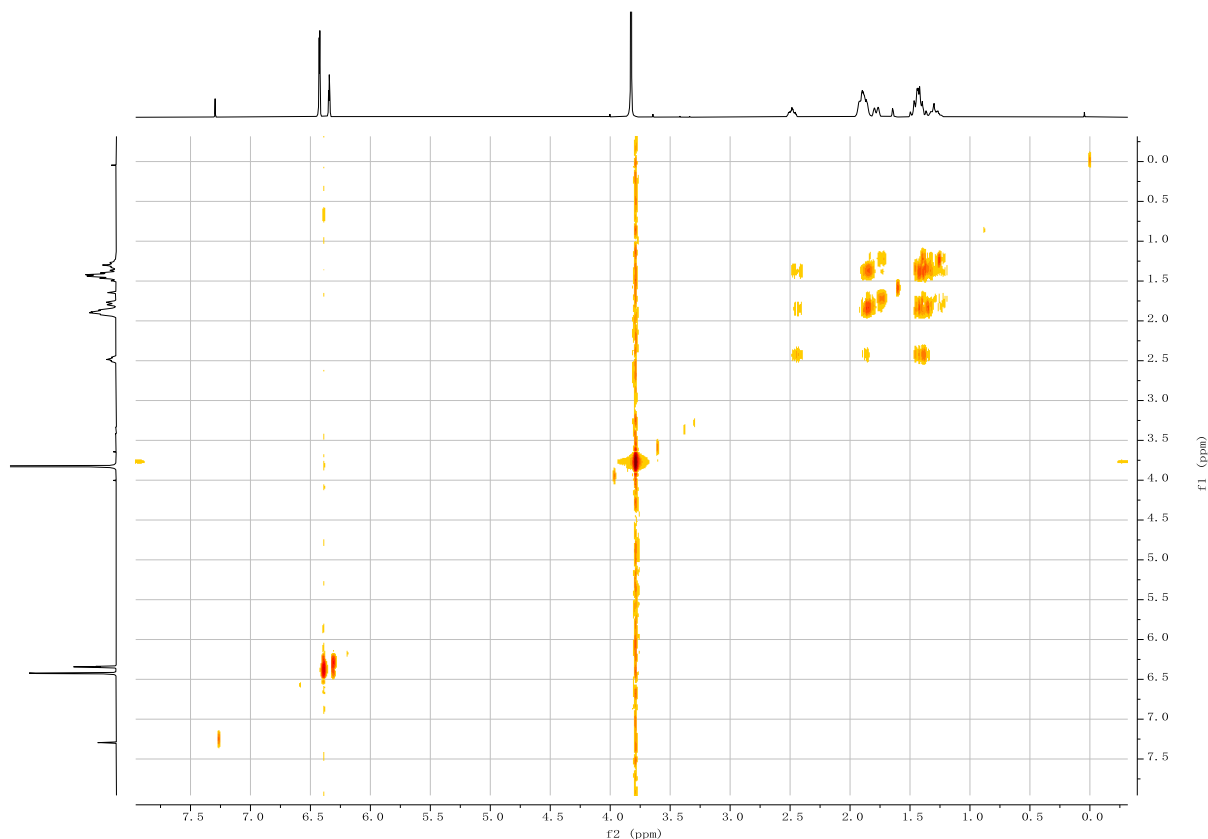

### c-2. 1-Cyclohexyl-3,5-dimethoxybenzene-*d*<sub>7</sub>

Based on above analytic results in c-1. The spectrum of electrochemical reductive deuteration product, 1-cyclohexyl-3,5-dimethoxybenzene-*d*<sub>7</sub>, was analyzed as follows. The hydrogen peak at 3.80 ppm corresponded to hydrogens of -OCH<sub>3</sub> and was integrated into 6.00. The hydrogen peak at 2.45 ppm corresponded to the hydrogen at  $\alpha$  site of aromatic ring. The D-incorporation of this site was  $(1-0.09)/1 * 100\% = 91\%$ . The hydrogen peaks at 1.85 and 1.38 ppm were correspond to hydrogens at  $\beta$  and  $\gamma$  site of aromatic ring. The average D-incorporation of these sites was  $(8-1.00-2.10)/4 * 100\% = 123\%$ . The hydrogen peaks at 1.68 and 1.23 ppm corresponded to  $\delta$  site of aromatic ring. The D-incorporation of this site was  $(2-0.49-0.47)/2 * 100\% = 104\%$ .

dyq-1-122-3

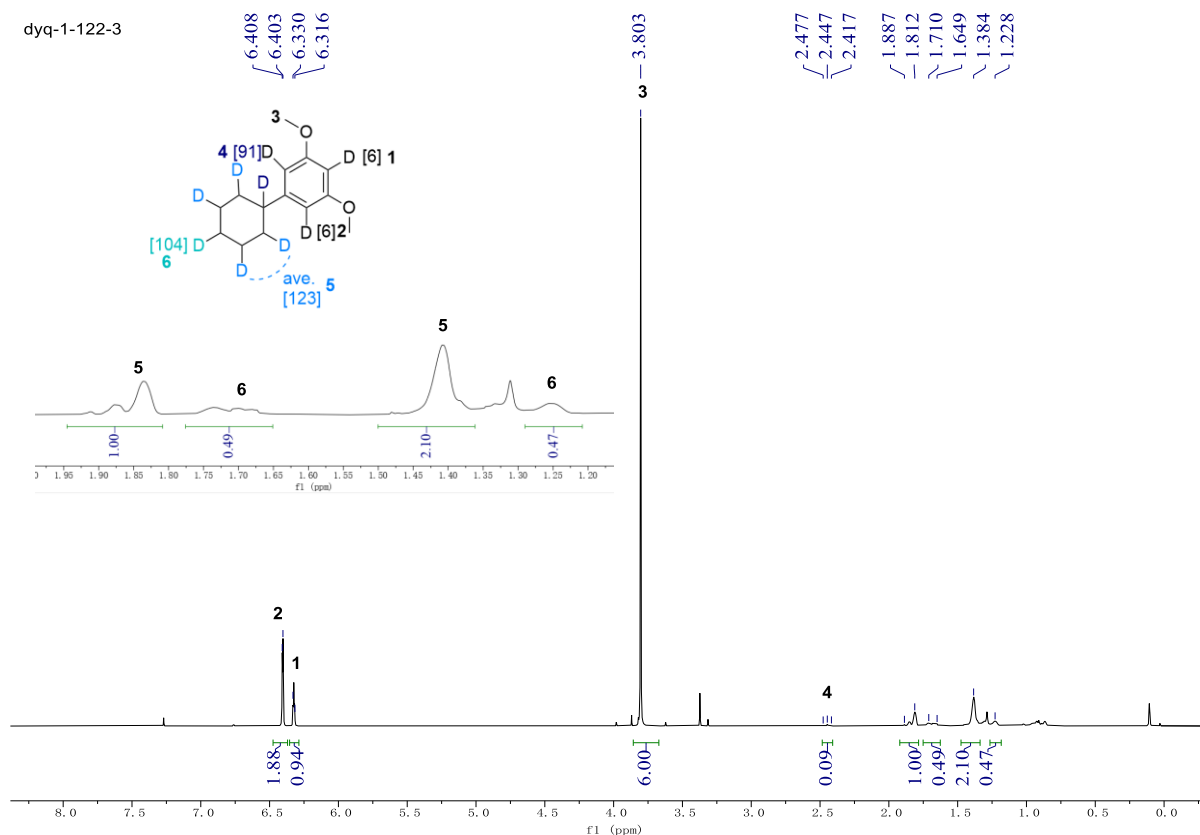

## 7. Procedure for H/D exchange of arenes

### Procedure 1:

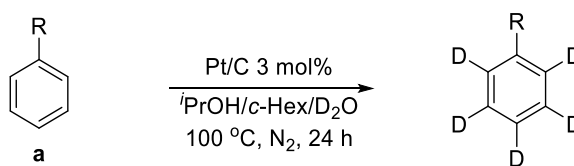

The method was modified from Sajiki's work<sup>1</sup>. In an over dried schlenk tube, substrate **a** 0.4 mmol and Pt/C (20 wt%) 3 mol% were added. After the tube was flushed with N<sub>2</sub> 3 times, *i*PrOH/*c*-Hex/D<sub>2</sub>O = 0.1/0.9/2 mL were added. Then, the tube was placed into an oil bath and heated to 100 °C for 24 h. After completion of reaction, the reaction solution was filtered with Na<sub>2</sub>SO<sub>4</sub>, washed with DCM (3 times) and concentrated by rotary evaporation. The residue was directly used in the followed electro-reductive deuteration reactions without further purification. Substrate **1c** and **2c** were deuterated with this H/D exchange method.

## Procedure 2:

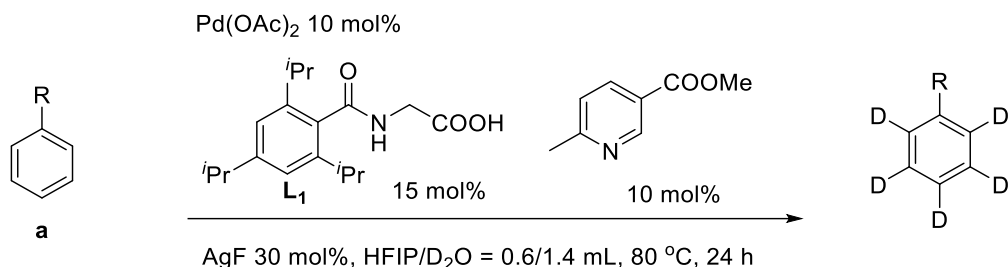

The method was modified from Gemmeren's work<sup>2</sup>. In an over dried schlenk tube, substrate **a** 0.4 mmol, **L**<sub>1</sub> 15 mol%, methyl 6-methylnicotinate 10 mol% and AgF 30 mol% were added. After the tube was flushed with N<sub>2</sub> 3 times, HFIP/D<sub>2</sub>O = 0.6/1.4 mL were added. Then, the tube was placed into an oil bath and heated to 80 °C for 24 h. After completion of reaction, the reaction solution was filtered with Na<sub>2</sub>SO<sub>4</sub>, washed with DCM (3 times) and concentrated by rotary evaporation. The residue was directly used in the followed electro-reductive deuteration reactions without further purification. Substrate **3-6c**, **8c** and **9c** were deuterated with this H/D exchange method.

## Procedure 3:

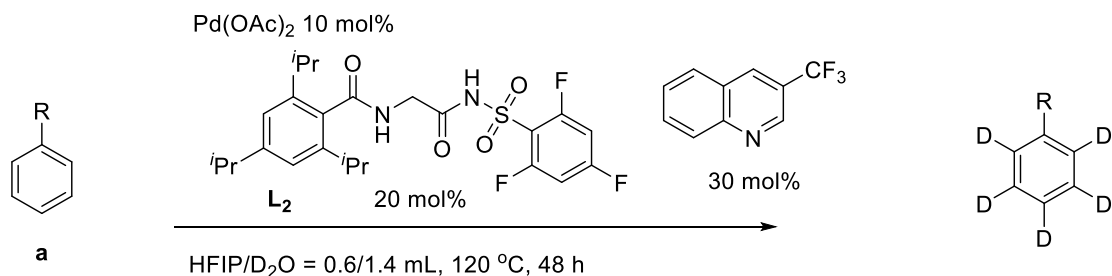

The method was also modified from Gemmeren's work<sup>2</sup>. In an over dried schlenk tube, substrate **a** 0.4 mmol, **L**<sub>2</sub> 20 mol% and 3-(trifluoromethyl)quinoline 30 mol% were added. After the tube was flushed with N<sub>2</sub> 3 times, HFIP/D<sub>2</sub>O = 0.6/1.4 mL were added. Then, the tube was placed into an oil bath and heated to 120 °C for 48 h. After completion of reaction, the reaction solution was filtered with Na<sub>2</sub>SO<sub>4</sub>, washed with DCM (3 times) and concentrated by rotary evaporation. The residue was directly used in the followed electro-reductive deuteration reactions without further purification. Substrate **7c** was deuterated with this H/D exchange method.

#### Procedure 4:

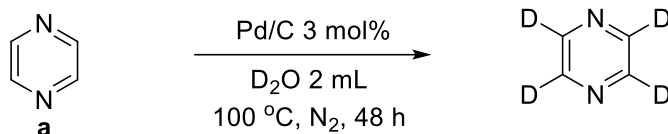

In an over dried schlenk tube, substrate **a** 0.4 mmol and Pd/C (10 wt%) 3 mol% were added. After the tube was flushed with N<sub>2</sub> 3 times, D<sub>2</sub>O 2 mL was added. Then, the tube was placed into an oil bath and heated to 120 °C for 48 h. After completion of reaction, the reaction solution was filtered and the filtrate was directly used in the followed electro-reductive deuteration reactions without further purification. Substrate **10c** was deuterated with this H/D exchange method.

### 8. Procedure for the synthesis of D-labeling drugs

#### Procedure for synthesis of [D] Glipizide:

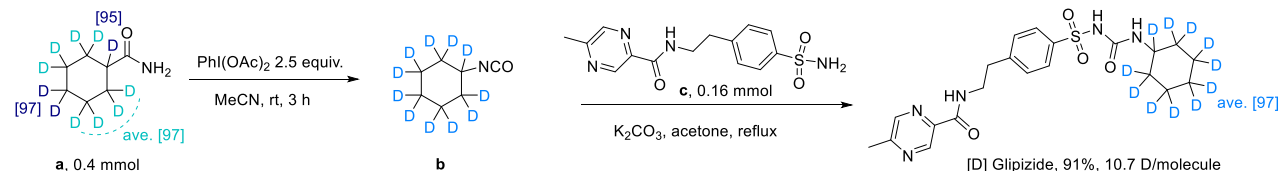

Step 1: In an over dried schlenk tube, cyclohexane-*d*<sub>11</sub>-1-carboxamide **a** (0.4 mmol) and PhI(OAc)<sub>2</sub> (1.0 mmol) were added in MeCN (2 mL). After stirring the solution at room temperature for 3 h, the solution was concentrated and the product **b** was obtained by flash column chromatography on silica gel.

Step 2: In an over dried schlenk tube, substrate **c** (0.16 mmol) and K<sub>2</sub>CO<sub>3</sub> (0.30 mmol) were added in acetone (2 mL). After stirring the solution at 61 °C for 7 h, the product obtained in step 1 was added. Then reaction mixture was stirred at 61 °C for another 7 h, followed by at room temperature for 1 h. Then, the reaction solution was concentrated and the product [D] Glipizide was obtained by flash column chromatography on silica gel.

## Procedure for synthesis of [D] Praziquantel:

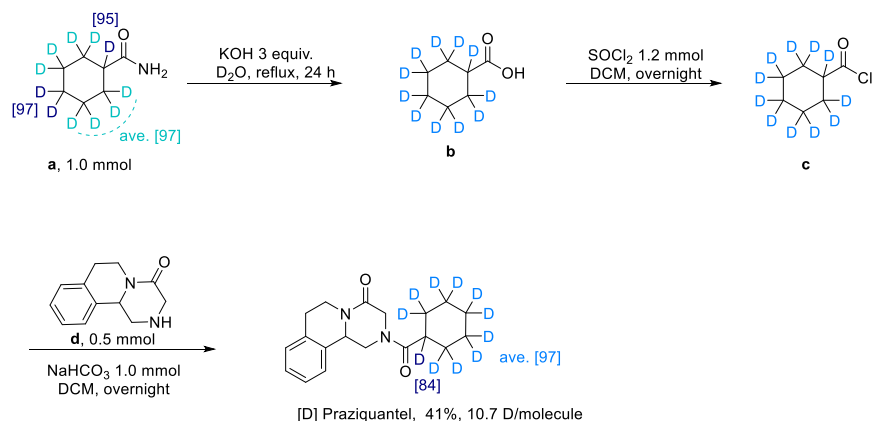

Step 1: In an over dried schlenk tube, cyclohexane- $d_{11}$ -1-carboxamide **a** (1.0 mmol) and KOH (3.0 mmol) were added in  $D_2O$  (4 mL). After stirring at 100 °C for 3 h, the solution was acidified by HCl and DCM (20 mL) was added. The organic phase was separated and aqueous solution was extracted by DCM 2 times. The combined organic phase was dried by  $Na_2SO_4$  and concentrated under reduced pressure by an aspirator and the crude product **b** was obtained directly using in the following step.

Step 2: In an over dried schlenk tube, product **b** obtained in the step 1 was added in DCM (2 mL). Then  $SOCl_2$  (1.2 mmol) was added dropwise. After the reaction mixture was stirred at room temperature overnight, the solution was concentrated under reduced pressure by an aspirator and the crude product **c** was obtained directly using in the following step.

Step 3: In an over dried schlenk tube, amine **d** (0.5 mmol) and  $NaHCO_3$  (1.0 mmol) were added in DCM (2 mL). Then product **c** obtained in step 2 was added slowly. After stirring at room temperature overnight, the reaction solution was concentrated under reduced pressure by an aspirator and the pure product [D] Praziquantel was obtained by flash column chromatography on silica gel.

## Procedure for synthesis of [D] Bromhexine:

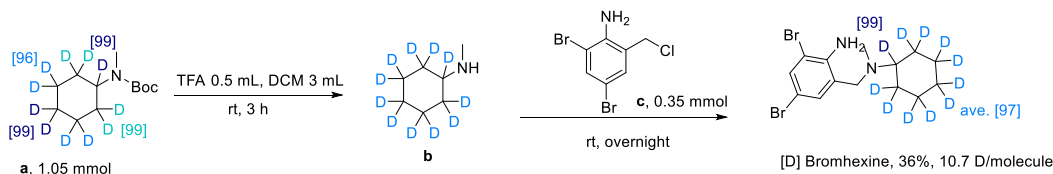

In an over dried schlenk tube, tert-butyl (cyclohexyl- $d_{11}$ )(methyl)carbamate **a** 1.05 mmol was added. Then, TFA 0.5 mL and DCM 3 mL were added. The solution was stirred at room



temperature for 3 h. After completion of reaction, NaOH aqueous was added adjusting pH to 14, and then the solution was extracted with DCM (3 times). The combined organic phase was dried by Na<sub>2</sub>SO<sub>4</sub>, concentrated to 3 mL and then 0.35 mmol **c** was added. After stirring overnight at rt, the reaction mixture was concentrated under reduced pressure by an aspirator, then the pure product was obtained by flash column chromatography on silica gel.

### Procedure for synthesis of 5-chloro-N-(cyclohexyl-*d*<sub>11</sub>)pentanamide:

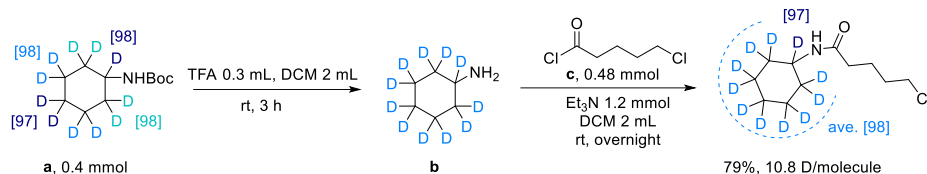

In an oven dried schlenk tube, tert-butyl (cyclohexyl-*d*<sub>11</sub>)carbamate **a** 0.4 mmol was added. Then, TFA 0.3 mL and DCM 2 mL were added. The solution was stirred at room temperature for 3 h. After completion of reaction, NaOH aqueous was added adjusting pH to 14, and then the solution was extracted with DCM (3 times). The combined organic phase was concentrated to 3 mL and then 0.48 mmol **c**, 1.2 mmol Et<sub>3</sub>N were added. After stirring overnight at rt, the reaction mixture was dried by Na<sub>2</sub>SO<sub>4</sub>, concentrated under reduced pressure by an aspirator, then the pure product was obtained by flash column chromatography on silica gel.

### Procedure for synthesis of [D] Apixaban:

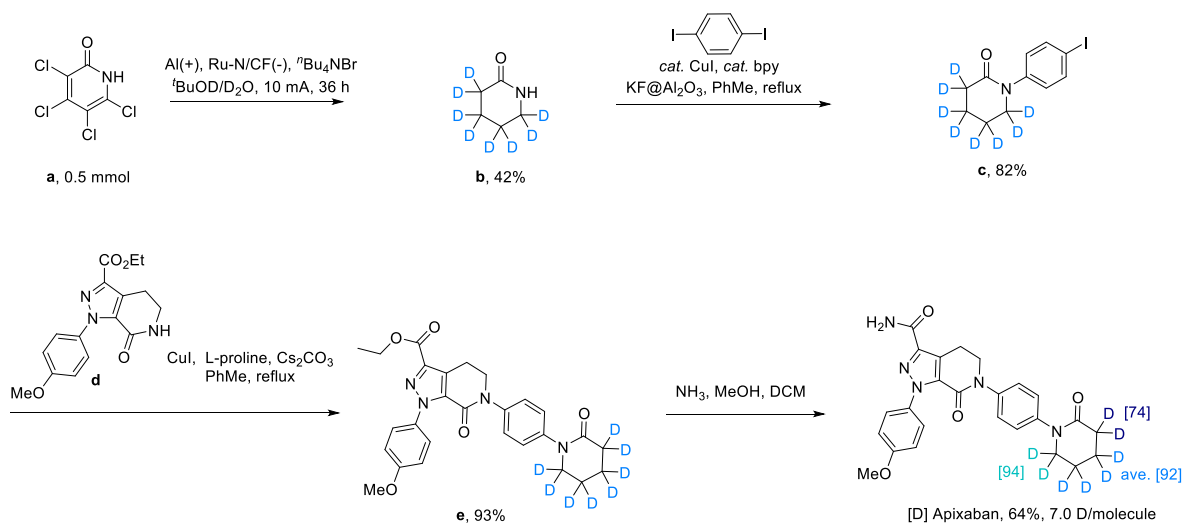

Step1: The 3,4,5,6-tetrachloropyridin-2(1*H*)-one **a** (0.5 mmol) and <sup>t</sup>Bu<sub>4</sub>NBr (0.8 mmol) were placed in an oven-dried undivided three-necked bottle (25 mL). The bottle was equipped with a

stir bar, an aluminum sheet (10 mm × 15 mm × 0.3 mm) anode and N doped carbon felt supported Ru cathode (10 mm × 15 mm × 3.0 mm). The bottle was flushed with Ar. Degassed <sup>t</sup>BuOD (5.0 mL) and degassed D<sub>2</sub>O (5.0 mL) were added. The reaction mixture was stirred and electrolyzed at a constant current of 10 mA at room temperature for 36 h. After completion of the reaction, the reaction mixture was concentrated under reduced pressure by an aspirator, then the product **b** was obtained by flash column chromatography on silica gel.

Step 2: This method was adapted from Hosseinzadeh's work<sup>3</sup>. In an over dried schlenk tube, intermediate **b** (0.5 mmol), 1,4-diiodobenzene (2.5 mmol), KF@Al<sub>2</sub>O<sub>3</sub> (2.5 mmol), CuI (0.2 mmol) and 1,10-phenanthroline (0.2 mmol) were added. After the tube was flushed with N<sub>2</sub> 3 times, 3 mL toluene were added. Then, reaction solution was refluxed for 18 h. After completion of reaction, the reaction solution was concentrated by rotary evaporation and separated by flash column chromatography on silica gel to obtain the product **c**.

Step 3: In an over dried schlenk tube, substrate **d** (0.3 mmol), intermediate **c** (0.41 mmol), Cs<sub>2</sub>CO<sub>3</sub> (1.35 mmol), CuI (0.15 mmol) and L-proline (0.15 mmol) were added. After the tube was flushed with N<sub>2</sub> 3 times, 3 mL toluene were added. Then, reaction solution was refluxed for 24 h. After completion of reaction, the reaction solution was concentrated by rotary evaporation and separated by flash column chromatography on silica gel to obtain the product **e**.

Step 4: In an over dried schlenk tube, intermediate **e** (0.28 mmol) was added in 2 mL DCM. Then 7.5 mL NH<sub>3</sub> in MeOH solution (7 M) was added. After the reaction was stirred at room temperature for 72 h, the reaction solution was concentrated by rotary evaporation and separated by flash column chromatography on silica gel to obtain the product [D] Apixaban.

### Procedure for synthesis of [D] Propylhexedrine:

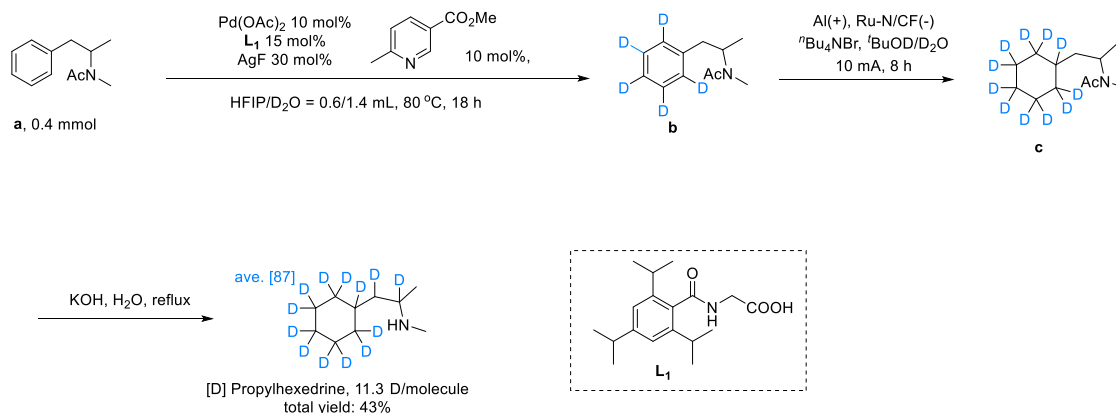

Step 1: In an over dried schlenk tube, substrate **a** 0.4 mmol, **L1** 15 mol%, methyl 6-methylnicotinate 10 mol% and AgF 30 mol% were added. After the tube was flushed with N<sub>2</sub> 3 times, HFIP/D<sub>2</sub>O = 0.6/1.4 mL were added. Then, the reaction tube was placed into an oil bath and heated to 80 °C for 18 h. After completion of reaction, the reaction solution was filtered with Na<sub>2</sub>SO<sub>4</sub>, washed with DCM (3 times) and concentrated by rotary evaporation. The residue (intermediate **b**) was directly used in the followed electro-reductive deuteration reactions without further purification.

Step 2: The obtained intermediate **b** and <sup>n</sup>Bu<sub>4</sub>NBr (0.4 mmol) were placed in an oven-dried undivided three-necked bottle (25 mL). The bottle was equipped with a stir bar, an aluminum sheet (10 mm × 15 mm × 0.3 mm) anode and N doped carbon felt supported Ru cathode (10 mm × 15 mm × 3.0 mm). The bottle was flushed with Ar. Degased <sup>t</sup>BuOD (2.5 mL) and degased D<sub>2</sub>O (2.5 mL) were added. The reaction mixture was stirred and electrolyzed at a constant current of 10 mA at room temperature for 8 h. After completion of the reaction, the reaction mixture was concentrated under reduced pressure by an aspirator, then the product **c** was obtained by flash column chromatography on silica gel.

Step 3: In an over dried schlenk tube, intermediate **c** and KOH (2 mmol) were added into H<sub>2</sub>O (3 mL). After refluxing the solution for 24 h, the solution was extracted with DCM (3 times). The combined organic phase was concentrated under reduced pressure by an aspirator to obtain the [D] Propylhexedrine.

### Procedure for synthesis of [D] Quinfamide:

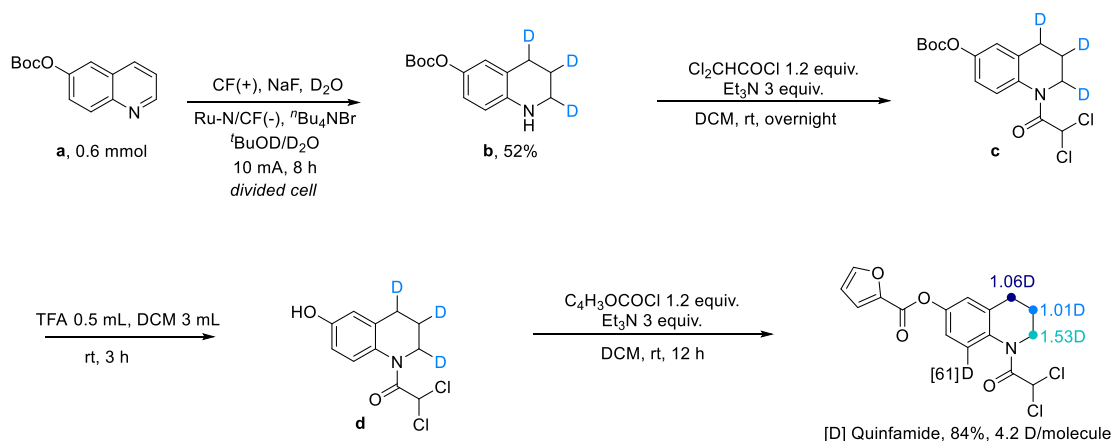

Step 2: In an over dried schlenk tube, intermediate **b** (1.26 mmol) was added. Then,  $\text{Cl}_2\text{CHCOCl}$  (1.2 equiv.),  $\text{Et}_3\text{N}$  (3 equiv.) and DCM 3 mL were added. The solution was stirred at room temperature overnight. After completion of reaction, the reaction mixture was extracted with DCM (3 times). The combined organic phase was dried by  $\text{Na}_2\text{SO}_4$ , concentrated under reduced pressure by an aspirator and then TFA 0.5 mL and DCM 3 mL were added. After stirring the solution at room temperature for 3 h, NaOH aqueous was added to adjust pH to 14, and then the solution was extracted with DCM (3 times). The combined organic phase was concentrated to 3 mL and then 2-furoyl chloride (1.2 equiv.) and  $\text{Et}_3\text{N}$  (3 equiv.) were added. After stirring overnight at rt, the reaction mixture was concentrated under reduced pressure by an aspirator, then the pure product was obtained by flash column chromatography on silica gel.

Reaction scheme for the synthesis of **b** and **c**:

**a** (0.5 mmol) + **2HCl** (3 equiv.)  $\xrightarrow[\text{toluene 3 mL, reflux, N}_2, 18 \text{ h}]{\text{Pd}_2(\text{dba})_3 \text{ 5 mol\%, (R)-BINAP 15 mol\%, } ^t\text{BuONa 7.5 equiv.}}$  **b** (58%)

**c** (0.2 mmol) + **b** (1.2 equiv.)  $\xrightarrow[\text{EtOH, 80 } ^\circ\text{C, 12 h}]{\text{Na}_2\text{CO}_3 \text{ 2.4 equiv.}}$  **99%**, [D] Aripiprazole (7.6 D/molecule)

Step 1: In an over dried schlenk tube, substrate **a** (0.5 mmol), piperazine hydrochloride-*d*<sub>8</sub> (1.5 mmol), Pd<sub>2</sub>(dba)<sub>3</sub> (5 mol%), (*R*)-BINAP (15 mol%), <sup>t</sup>BuONa (3.75 mmol) were added. After the tube was flushed with N<sub>2</sub> 3 times, 3 mL toluene were added. Then, reaction solution was refluxed for 18 h. After completion of reaction, the reaction solution was concentrated by rotary evaporation and separated by flash column chromatography on silica gel to obtain the product **b**.

Step 2: In an over dried schlenk tube, substrate **c** (0.2 mmol), intermediate product **b** (0.24 mmol), Na<sub>2</sub>CO<sub>3</sub> (0.48 mmol) were added into 2 mL EtOH. Then, reaction solution was heated at 80 °C for 12 h. After completion of reaction, the reaction solution was concentrated by rotary evaporation and separated by flash column chromatography on silica gel to obtain the product [D] Aripiprazole.

### Procedure for synthesis of [D] Brexpiprazole:

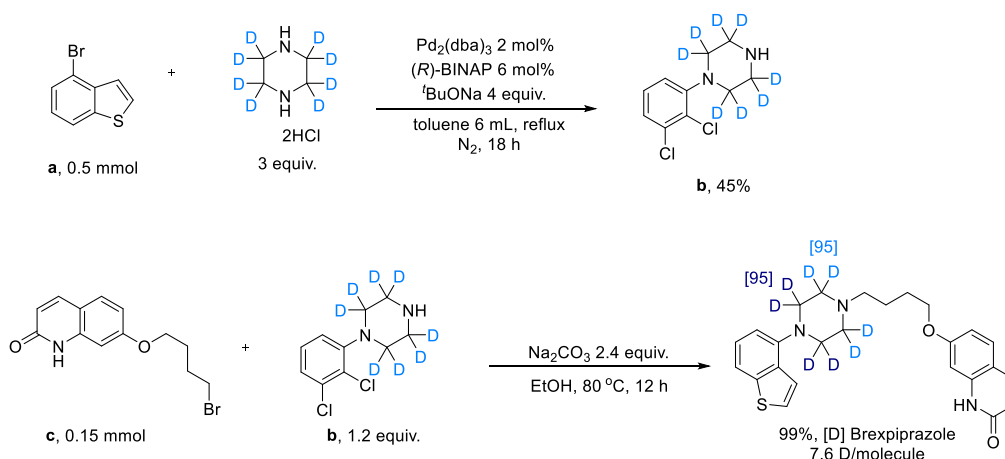

Step 1: In an over dried schlenk tube, substrate **a** (0.5 mmol), piperazine hydrochloride-*d*<sub>8</sub> (1.5 mmol), Pd<sub>2</sub>(dba)<sub>3</sub> (2 mol%), (*R*)-BINAP (6 mol%), <sup>t</sup>BuONa (2.0 mmol) were added. After the tube was flushed with N<sub>2</sub> 3 times, 6 mL toluene was added. Then, reaction solution was refluxed for 18 h. After completion of reaction, the reaction solution was concentrated by rotary evaporation and separated by flash column chromatography on silica gel to obtain the product **b**.

Step 2: In an over dried schlenk tube, substrate **c** (0.15 mmol), intermediate product **b** (0.18 mmol) and Na<sub>2</sub>CO<sub>3</sub> (0.36 mmol) were added into 2 mL EtOH. Then, reaction solution was heated at 80 °C for 12 h. After completion of reaction, the reaction solution was concentrated by rotary evaporation and separated by flash column chromatography on silica gel to obtain the product [D] Brexpiprazole.

### Procedure for synthesis of [D] Bupirone:

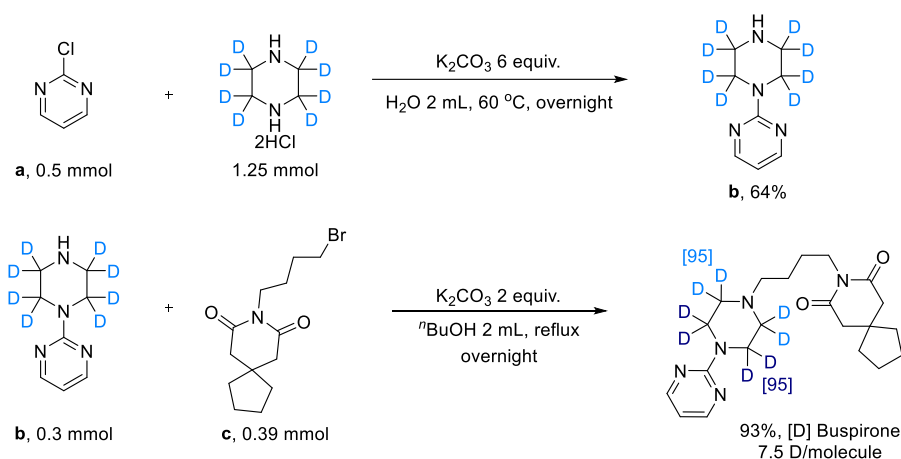

Step 2: In an over dried schlenk tube, intermediate product **b** (0.3 mmol), bromide **c** (0.39 mmol) and K<sub>2</sub>CO<sub>3</sub> (0.6 mmol) were added into 2 mL *n*BuOH. Then, reaction was refluxed overnight. After completion of reaction, the reaction solution was concentrated by rotary evaporation and separated by flash column chromatography on silica gel to obtain the product [D] Buspirone.

### Procedure for synthesis of [D] Fipexide:

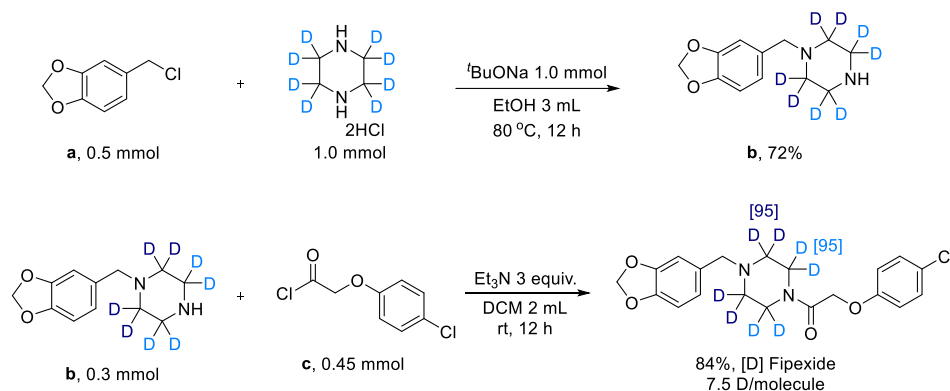

Step 1: In an over dried schlenk tube, chloride **a** (0.5 mmol), piperazine hydrochloride-*d*<sub>8</sub> (1.0 mmol) and <sup>t</sup>BuONa (1.0 mmol) were added into 3 mL EtOH. Then, the tube was placed into an oil bath and heated to 80 °C for 12 h. After completion of reaction, the reaction solution was concentrated by rotary evaporation and separated by flash column chromatography on silica gel to obtain the product **b**.

Step 2: In an over dried schlenk tube, intermediate product **b** (0.3 mmol), acyl chloride **c** (0.45 mmol), Et<sub>3</sub>N (0.9 mmol) were added into 2 mL DCM. Then, reaction solution was stirred at room temperature for 12 h. After completion of reaction, the reaction solution was concentrated by rotary evaporation and separated by flash column chromatography on silica gel to obtain the product [D] Fipexide.

### Procedure for synthesis of [D] 2C-B-BZP:

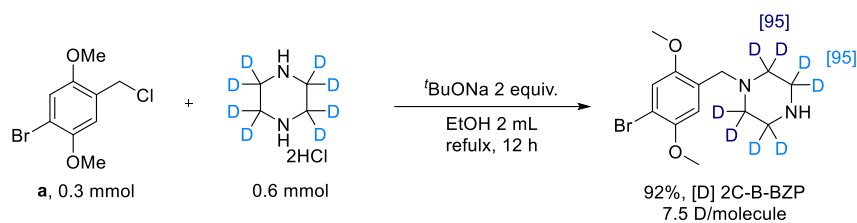

In an over dried schlenk tube, chloride **a** (0.3 mmol), piperazine hydrochloride-*d*<sub>8</sub> (0.6 mmol), <sup>t</sup>BuONa (0.6 mmol) were added into 2 mL EtOH. Then, reaction was refluxed for 12 h. After completion of reaction, the reaction solution was concentrated by rotary evaporation and separated by flash column chromatography on silica gel to obtain the product [D] 2C-B-BZP.

## 9. Procedure for the synthesis of 10 g scale deuterated piperazine hydrochloride

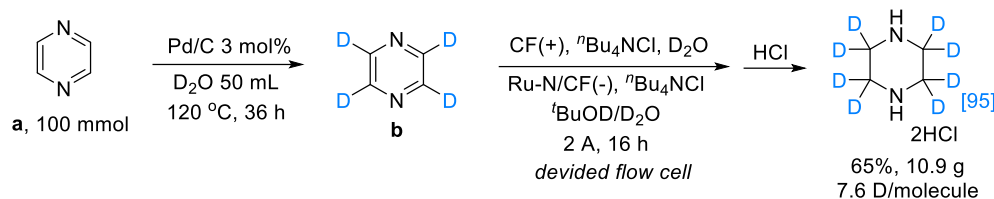

Step 1: In an over dried sealed tube, pyrazine **a** (100 mmol) and Pd/C (3 mol%) were added. After the tube was flushed with N<sub>2</sub> 3 times, D<sub>2</sub>O 50 mL was added. Then, reaction was heated at 120 °C for 36 h. After completion of reaction, the reaction solution was filtered to filter out Pd/C. The filtrate was directly used in the followed step.

Step 2: As shown in Supplementary Figure S9a, the filtrate in step 1, 250 mL D<sub>2</sub>O, 300 mL <sup>t</sup>BuOD and <sup>t</sup>Bu<sub>4</sub>NCl (0.2 M) were placed in a bottle connected to cathode cell. <sup>t</sup>Bu<sub>4</sub>NCl (0.2 M) and 400 mL D<sub>2</sub>O were placed in a bottle connected to anode cell. The two cell was separated by an anion exchange membrane. One peristaltic pump was used to circulate the liquid in the anode and cathode reaction cell, respectively. A carbon felt (135 mm × 75 mm × 3.0 mm) was used as anode and N doped carbon felt supported Ru electrode (135 mm × 75 mm × 3.0 mm) was used as cathode. After two bottle was bubbled with N<sub>2</sub> for 30 min. The reaction mixture was electrolyzed at a constant current of 2 A at room temperature for 16 h. After completion of the reaction, the cathode solution was acidified by HCl. The piperazine hydrochloride-*d*<sub>8</sub> was obtained by recrystallization (2 times) with water and ethanol (Supplementary Figure S9b).

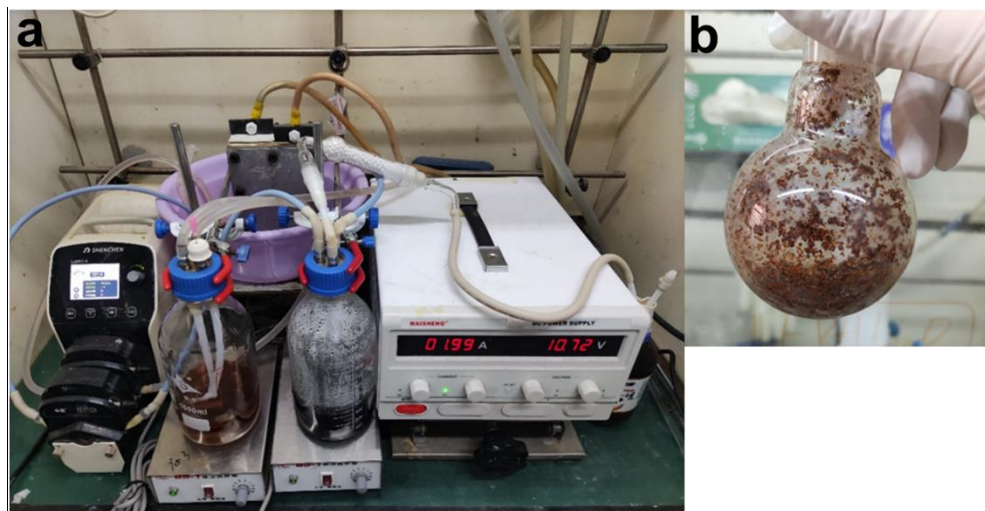

**Supplementary Figure S9.** (a) Electrochemical flow device. (b) Obtained piperazine hydrochloride-*d*<sub>8</sub>.



## 10. Recycling experiment

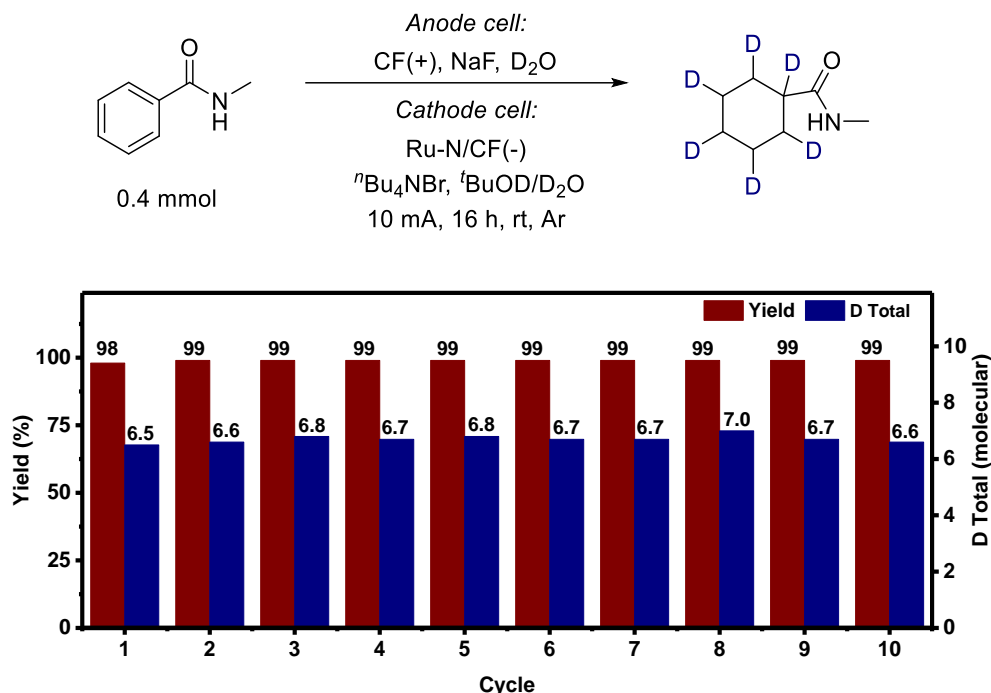

**Supplementary Figure S10.** Recycle experiment of electrochemical reductive deuteration of N-methylbenzamide catalyzed by Ru-N/CF.

The yield and total D number had almost no change in 10 cycles of arene electroreduction, which indicated that the activity of the Ru-N/CF was very stable.

## 11. Procedure for the synthesis of starting materials

### General procedure 1: procedure for the synthesis of amides

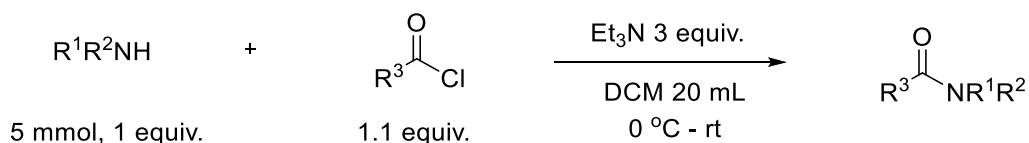

Amine (5 mmol, 1 equiv.) was dissolved in 20 mL DCM, followed by adding Et<sub>3</sub>N (15 mmol, 3 equiv.). Then the solution was placed on an ice bath. Acyl chloride (5.5 mmol, 1.1 equiv.) was added dropwise to the reaction mixture over 5 mins. The reaction was then allowed to heat to room temperature and stirred overnight. After completion of the reaction, 30 mL H<sub>2</sub>O was added and the solution was extracted with DCM (3 times). Then combined organic phase was dried over

anhydrous Na<sub>2</sub>SO<sub>4</sub> and concentrated in vacuo. The product was purified the product by flash column chromatography (eluent: EA) to obtain the corresponding product.

### General procedure 2: procedure for the synthesis of biaryl substrates

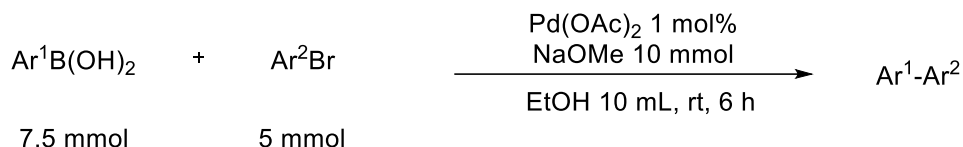

The method was modified from Li's work<sup>4</sup>. A mixture of aryl halide (5.0 mmol), arylboronic acid (7.5 mmol), Pd(OAc)<sub>2</sub> (1 mol%), NaOMe (10 mol) and EtOH (10 mL) were stirred at room temperature for 6 h. After the mixture had been filtered and concentrated, the residue was then purified by flash column chromatography to afford the corresponding coupled product.

### Produce for the synthesis of Boc-amine

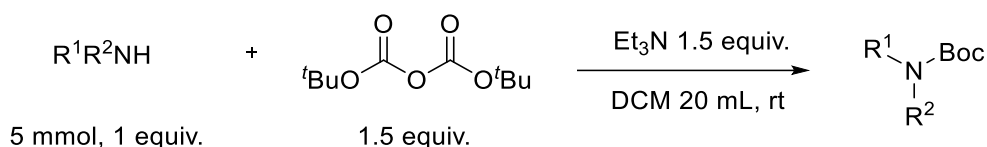

Amine (5 mmol, 1 equiv.), Et<sub>3</sub>N (7.5 mmol, 1.5 equiv.) and O(Boc)<sub>2</sub> (7.5 mmol, 1.5 equiv.) were dissolved in 20 mL DCM and stirred overnight at room temperature. After completion of the reaction, 30 mL H<sub>2</sub>O was added and the solution was extracted with DCM (3 times). Then combined organic phase was dried over anhydrous Na<sub>2</sub>SO<sub>4</sub> and concentrated in vacuo. The product was purified the product by flash column chromatography (eluent: DCM) to obtain the corresponding product.

### Produce for the synthesis of N-aryl-2- pyrrolidinone

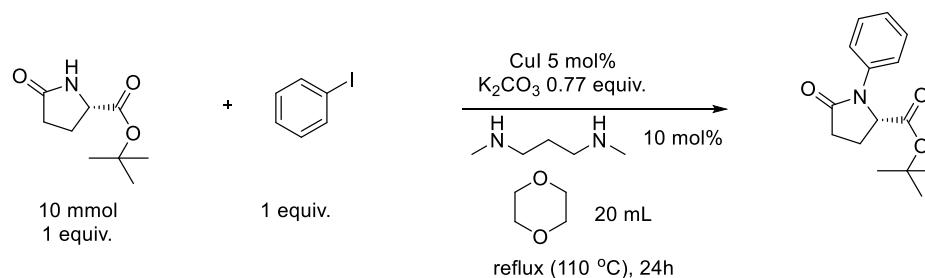

The method was modified from Lacour's work<sup>5</sup>. 2-pyrrolidinone (1 equiv.), iodobenzene (1 equiv.), anhydrous K<sub>2</sub>CO<sub>3</sub> (0.77 equiv.), CuI (5 mol%) and *N,N'*-dimethyl-1,3-propanediamine (10 mol%) were dissolved in dry 1,4- dioxane (0.65 M) and the mixture was refluxed for 24 h. Then, the reaction mixture was cooled at room temperature and extracted with ethyl acetate (3 times). The combined organic parts were washed with brine, dried over anhydrous Na<sub>2</sub>SO<sub>4</sub> and concentrated under reduced pressure. Eventually, the crude reaction mixture was purified by usual silica gel column chromatography (eluent: PE/EA = 2/1) to afford the desired *N*-aryl-2-pyrrolidinone.

### Produce for the synthesis of pentafluoro-*N*-methyl-Boc-aniline

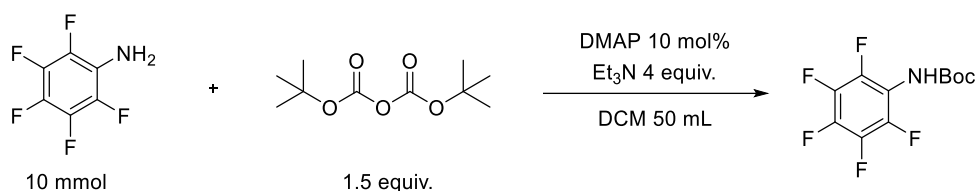

Amine (10 mmol, 1 equiv.), Et<sub>3</sub>N (40 mmol, 4.0 equiv.), DMAP (1 mmol, 10 mol%) and O(Boc)<sub>2</sub> (15 mmol, 1.5 equiv.) were dissolved in 50 mL DCM and the mixture was stirred overnight at room temperature. After completion of the reaction, 50 mL H<sub>2</sub>O was added and the solution was extracted with DCM (3 times). Then combined organic phase was dried over anhydrous Na<sub>2</sub>SO<sub>4</sub> and concentrated in vacuo. The product was purified the product by flash column chromatography (eluent: DCM) to obtain *N*-Boc-2,3,4,5,6-pentafluoroaniline.

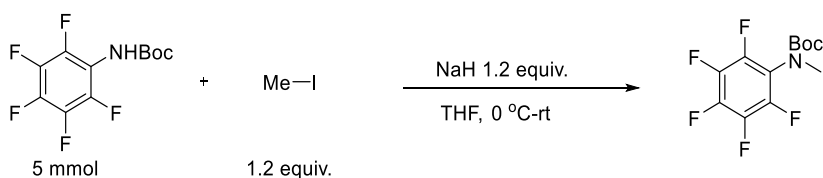

To a solution of *N*-Boc-pentafluoroaniline (5 mmol, 1.0 equiv.) in THF (1.2 M), NaH (1.2 equiv.) and MeI (1.2 equiv.) were added at 0 °C. After being stirred at room temperature for 12 h, the reaction mixture was poured into water and then the solution was extracted with CH<sub>2</sub>Cl<sub>2</sub> (3 times), dried over Na<sub>2</sub>SO<sub>4</sub>, and concentrated in vacuo. The residue was purified by column chromatography (eluent: DCM) on silica gel to give the corresponding product.

### Produce for the synthesis of tert-butyl 3-phenylpropanoate

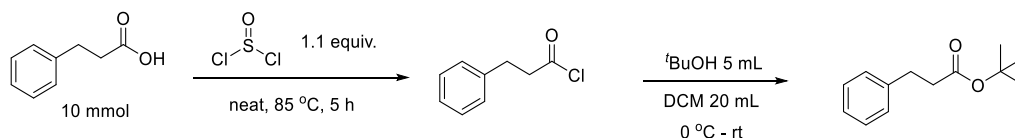

Dissolve the acid (10 mmol, 1 equiv.) in thionyl chloride (11 mmol, 1.1 equiv.) and reflux for 5 h. After reaction, thionyl chloride was distilled under reduced pressure. The obtained crude acyl chloride product was then dissolved in 20 mL DCM and placed on an ice bath. *t*-BuOH (5 mL) was added dropwise to the reaction mixture over 5 mins. Then the reaction was allowed to heat to room temperature and stirred overnight. After completion of reaction, the reaction solution was concentrated under vacuo. The residue was purified by column chromatography (eluent: DCM) on silica gel to give the corresponding product.

### Produce for the synthesis of alcohols

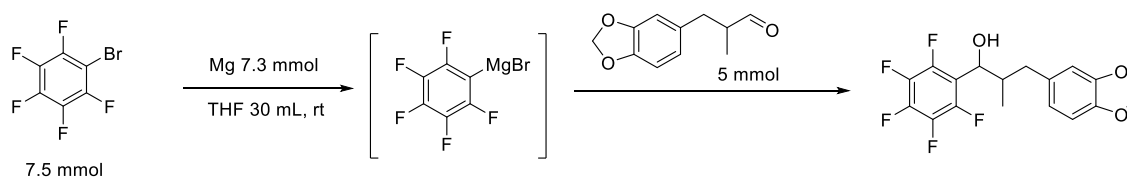

The method was modified from Filhol's work<sup>6</sup>. Magnesium turnings (7.3 mmol, 175.2 mg) were placed in a 100 mL three necked flask equipped with a magnetic stir bar and a dropping funnel. Place the setup under an inert atmosphere of N<sub>2</sub>. Cover the magnesium turnings with 30 mL of THF. Charge the dropping funnel with a portion of 1-bromo-2,3,4,5,6-pentafluorobenzene (7.5 mmol) via a syringe. Add a few drops of bromopentafluorobenzene to the flask to initiate the formation of the magnesium derivative. Add the left solution dropwise to the flask. The reaction was stirred at room temperature until the magnesium turnings disappear. Then aldehyde (5 mmol) was injected into the dropping funnel and added dropwise to the reaction mixture. After stirred for 12 h, the reaction was quenched by 50 mL water. The reaction solution was extracted by DCM (3 times), dried over Na<sub>2</sub>SO<sub>4</sub>, and concentrated in vacuo. The residue was purified by column chromatography (eluent: PE/EA) on silica gel to give the corresponding product.

### Produce for the synthesis of 1-(1*H*-pyrrol-1-yl)ethan-1-one

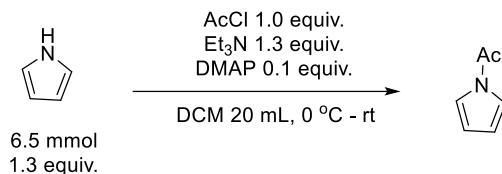

The method was modified from Wu's work<sup>7</sup>. Add benzoyl chloride (1.0 equiv.) dropwise to a stirred solution of pyrrole (1.3 equiv.), triethylamine (1.3 equiv.) and DMAP (0.1 equiv.) in CH<sub>2</sub>Cl<sub>2</sub> (10 mL) at 0 °C. Then, the solution was warmed to room temperature. Stir the mixture till the end of the reaction. Then, the reaction mixture was diluted with ethyl acetate and washed with 1 M HCl (10 mL), saturated aqueous NaHCO<sub>3</sub> (10 mL) and brine (10 mL) in turn. Next, the residue was dried over Na<sub>2</sub>SO<sub>4</sub>, filtered, concentrated in vacuo and purified by column chromatography (eluent: PE/EA) on silica gel to give the corresponding product.

### Produce for the synthesis of 3,4,5,6-tetrachloropyridin-2-ol

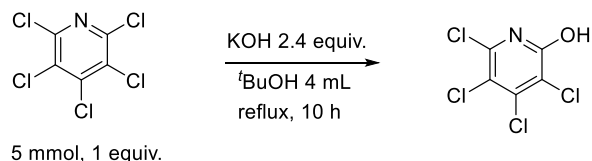

The method was modified from Bhalerao's work<sup>8</sup>. Perchloropyridine (1.26 g, 5 mmol) and potassium hydroxide (672 mg, 12 mmol) were refluxed in tertiary butanol (4 mL) for 10 h. The reaction mixture was cooled, solvent was removed under reduced pressure. The residue was dissolved in water (20 mL) and extracted with dichloromethane to remove the unreacted product. The aqueous layer was acidified with conc. hydrochloric acid and extracted with dichloromethane. Then, the organic layer was dried over Na<sub>2</sub>SO<sub>4</sub>, concentrated in vacuo and purified by column chromatography to afford the tetrachloropyridin-2-ol.

## 12. Characterization of products

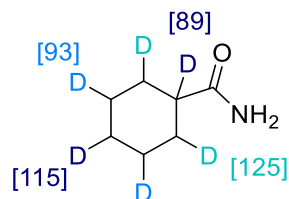

**Cyclohexane-1,2,3,4,5,6-*d*<sub>6</sub>-1-carboxamide (1b).** The title product was obtained with 82% yield (50.3 mg, 0.4 mmol scale) as white solid. <sup>1</sup>H NMR (400 MHz, CDCl<sub>3</sub>) δ 5.49 (d, *J* = 23.2 Hz, 2.00H), 2.16-2.10 (m, 0.11H), 1.91-1.87 (m, 0.19H), 1.81-1.76 (m, 1.22H), 1.64 (s, 0.21H), 1.39 (s, 1.32H), 1.31-1.22 (m, 0.92H), 1.19 (s, 0.64H); <sup>13</sup>C NMR (101 MHz, DMSO-*d*<sub>6</sub>) δ 177.46, 43.16 (m, labeled), 28.55 (m, labeled), 24.79 (m, labeled).

Deuterium incorporation: 6.4 D/molecule (<sup>1</sup>H-NMR), 6.3 D/molecule [HRMS (ESI)].

dyq-1-18-3 #617-862 RT: 2.63-3.67 AV: 246 NL: 3.61E5  
T: FTMS + p ESI Full ms [100.00-300.00]

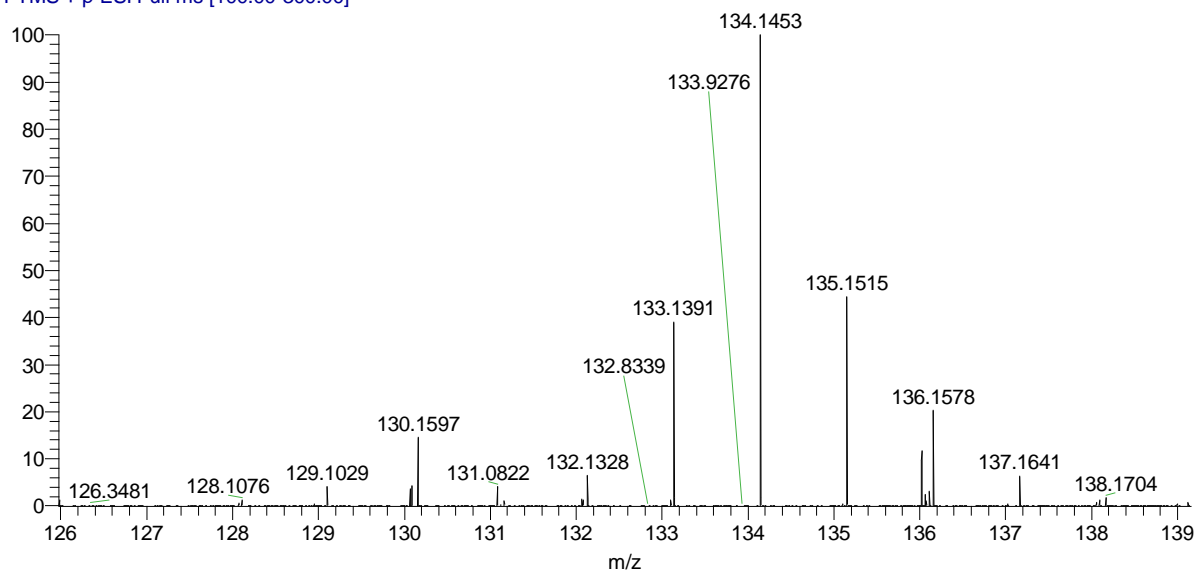

132.1328 (C<sub>7</sub>H<sub>9</sub>D<sub>4</sub>NO + H<sup>+</sup>, 3%), 133.1391 (C<sub>7</sub>H<sub>8</sub>D<sub>5</sub>NO + H<sup>+</sup>, 18%), 134.1453 (C<sub>7</sub>H<sub>7</sub>D<sub>6</sub>NO + H<sup>+</sup>, 47%), 135.1515 (C<sub>7</sub>H<sub>6</sub>D<sub>7</sub>NO + H<sup>+</sup>, 20%), 136.1578 (C<sub>7</sub>H<sub>5</sub>D<sub>8</sub>NO + H<sup>+</sup>, 9%), 137.1641 (C<sub>7</sub>H<sub>4</sub>D<sub>9</sub>NO + H<sup>+</sup>, 3%), 138.1704 (C<sub>7</sub>H<sub>3</sub>D<sub>10</sub>NO + H<sup>+</sup>, 1%).

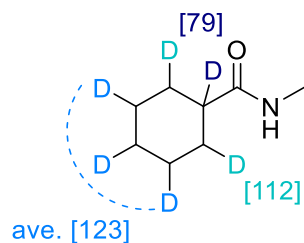

***N*-methylcyclohexane-1,2,3,4,5,6-*d*<sub>6</sub>-1-carboxamide (2b)**, The title product was obtained with 98% yield (57.9 mg, 0.4 mmol scale) as white solid. <sup>1</sup>H NMR (400 MHz, CDCl<sub>3</sub>) δ 5.94 (s, 1.00H), 2.75 (d, *J* = 4.8 Hz, 3.00H), 2.07-2.01 (m, 0.21H), 1.81-1.77 (m, 0.30H), 1.74-1.70 (m, 1.09H), 1.63-1.59 (m, 0.26H), 1.36 (s, 1.46H), 1.18-1.13 (m, 0.97H); <sup>13</sup>C NMR (101 MHz, CDCl<sub>3</sub>) δ 176.01, 45.12 (m, labeled), 29.50 (m, labeled), 26.39, 25.31 (m, labeled).

Deuterium incorporation: 6.7 D/molecule (<sup>1</sup>H-NMR), 6.7 D/molecule [HRMS (ESI)]

dyq-1-18-2 #665-1099 RT: 2.83-4.66 AV: 435 NL: 7.22E6  
T: FTMS + p ESI Full ms [100.00-300.00]

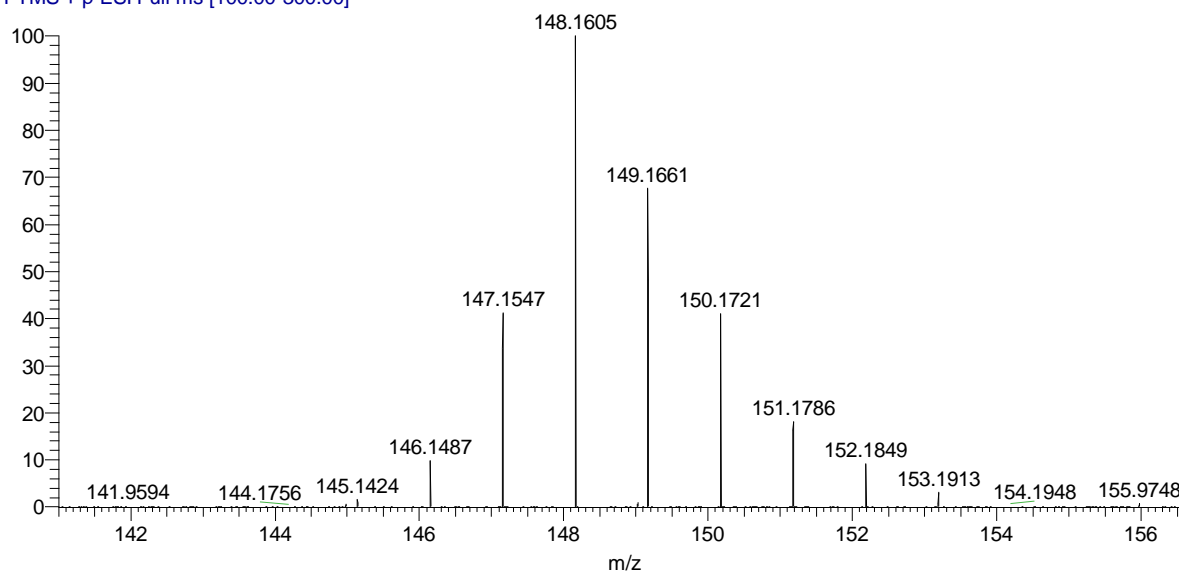

145.1424 (C<sub>8</sub>H<sub>12</sub>D<sub>3</sub>NO + H<sup>+</sup>, 1%), 146.1487 (C<sub>8</sub>H<sub>11</sub>D<sub>4</sub>NO + H<sup>+</sup>, 3%), 147.1547 (C<sub>8</sub>H<sub>10</sub>D<sub>5</sub>NO + H<sup>+</sup>, 12%), 148.1605 (C<sub>8</sub>H<sub>9</sub>D<sub>6</sub>NO + H<sup>+</sup>, 38%), 149.1661 (C<sub>8</sub>H<sub>8</sub>D<sub>7</sub>NO + H<sup>+</sup>, 22%), 150.1721 (C<sub>8</sub>H<sub>7</sub>D<sub>8</sub>NO + H<sup>+</sup>, 13%), 151.1786 (C<sub>8</sub>H<sub>6</sub>D<sub>9</sub>NO + H<sup>+</sup>, 7%), 152.1849 (C<sub>8</sub>H<sub>5</sub>D<sub>10</sub>NO + H<sup>+</sup>, 3%), 153.1913 (C<sub>8</sub>H<sub>4</sub>D<sub>11</sub>NO + H<sup>+</sup>, 1%).

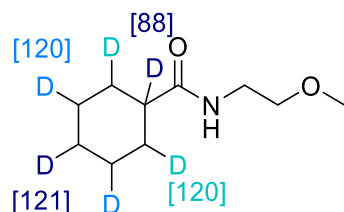

***N*-(2-methoxyethyl)cyclohexane-1,2,3,4,5,6-*d*<sub>6</sub>-1-carboxamide (3b).** The title product was obtained with 94% yield (72.0 mg, 0.4 mmol scale) as white solid. <sup>1</sup>H NMR (400 MHz, CDCl<sub>3</sub>) δ 5.89 (s, 0.98H), 3.43-3.41 (m, 4.00H), 3.35-3.32 (m, 2.99H), 2.08-2.02 (m, 0.12H), 1.83-1.80 (m, 0.21H), 1.72 (s, 1.74H), 1.60 (s, 0.25H), 1.38 (s, 1.46H), 1.23-1.16 (m, 1.20H); <sup>1</sup>H NMR (800 MHz, CDCl<sub>3</sub>) δ 5.86 (s, 0.99H), 3.44-3.41 (m, 4.05H), 3.34 (s, 3.00H), 2.06-2.03 (m, 0.12H), 1.83-1.80 (m, 0.21H), 1.76-1.73 (m, 1.19H), 1.65-1.61 (m, 0.24H), 1.41-1.38 (m, 1.39H), 1.21-1.20 (m, 0.41H), 1.16 (s, 0.55H); <sup>13</sup>C NMR (201 MHz, CDCl<sub>3</sub>) δ 176.38, 71.51, 58.92, 45.02 (m, labeled), 39.10, 29.19 (m, labeled), 25.25 (m, labeled).

Deuterium incorporation: 6.5 D/molecule (<sup>1</sup>H-NMR, 400 MHz), 6.9 D/molecule (<sup>1</sup>H-NMR, 800 MHz), 6.8 D/molecule [HRMS (ESI)].

DYQ-1-56-3 #458-745 RT: 3.42-5.53 AV: 288 NL: 1.16E7  
T: FTMS + p ESI Full ms [100.00-500.00]

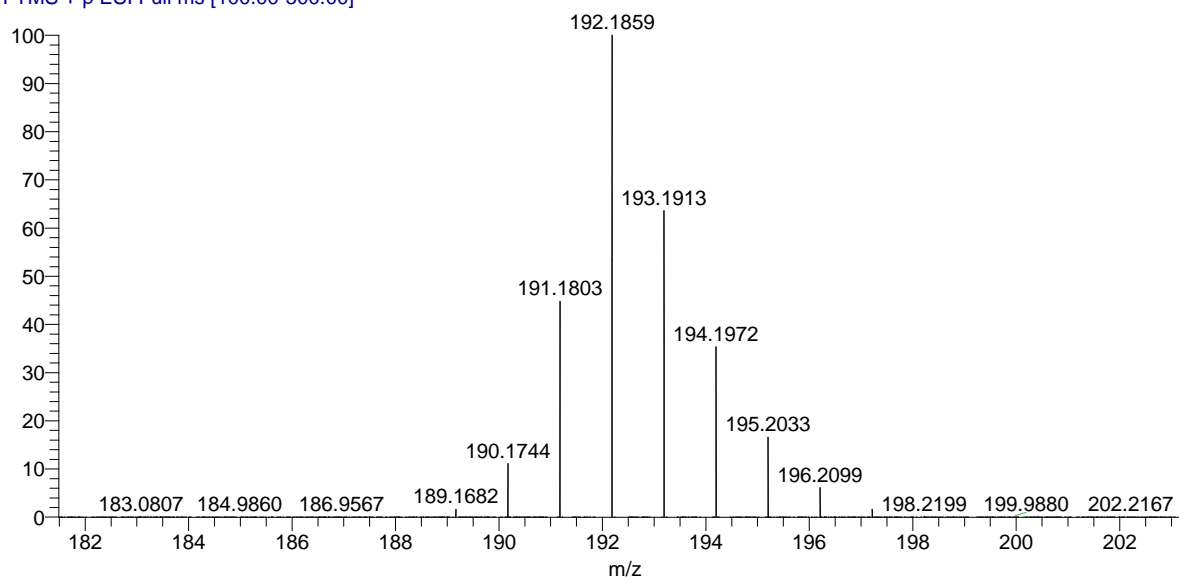

190.1744 (C<sub>10</sub>H<sub>15</sub>D<sub>4</sub>NO<sub>2</sub> + H<sup>+</sup>, 1%), 191.1803 (C<sub>10</sub>H<sub>14</sub>D<sub>5</sub>NO<sub>2</sub> + H<sup>+</sup>, 5%), 192.1859 (C<sub>10</sub>H<sub>13</sub>D<sub>6</sub>NO<sub>2</sub> + H<sup>+</sup>, 11%), 193.1913 (C<sub>10</sub>H<sub>12</sub>D<sub>7</sub>NO<sub>2</sub> + H<sup>+</sup>, 75%), 194.1972 (C<sub>10</sub>H<sub>11</sub>D<sub>8</sub>NO<sub>2</sub> + H<sup>+</sup>, 4%), 195.2033 (C<sub>10</sub>H<sub>10</sub>D<sub>9</sub>NO<sub>2</sub> + H<sup>+</sup>, 2%), 196.2099 (C<sub>10</sub>H<sub>9</sub>D<sub>10</sub>NO<sub>2</sub> + H<sup>+</sup>, 1%).



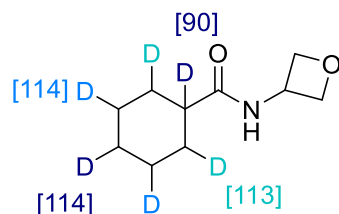

***N*-(oxetan-3-yl)cyclohexane-1,2,3,4,5,6-*d*<sub>6</sub>-1-carboxamide (4b).** The title product was obtained with 94% yield (66.8 mg, 0.4 mmol scale) as white solid. <sup>1</sup>H NMR (400 MHz, CDCl<sub>3</sub>) δ 6.54 (s, 1.00H), 5.07-4.98 (m, 1.00H), 4.89 (t, *J* = 7.0 Hz, 1.99H), 4.47 (t, *J* = 6.4 Hz, 2.00H), 2.07 (t, *J* = 11.8 Hz, 0.09H), 1.82-1.78 (m, 0.24H), 1.73 (s, 1.29H), 1.62 (s, 0.20H), 1.37 (s, 1.55H), 1.20-1.15 (m, 1.04H); <sup>1</sup>H NMR (800 MHz, CDCl<sub>3</sub>) δ 6.35 (s, 1.00H), 5.04 (s, 0.98H), 4.91 (s, 2.00H), 4.47 (s, 2.00H), 2.09-2.06 (m, 0.10H), 1.83-1.80 (m, 0.20H), 1.74 (s, 1.33H), 1.66-1.63 (m, 0.22H), 1.39 (s, 1.55H), 1.21 (s, 0.40H), 1.17 (s, 0.64H). <sup>13</sup>C NMR (101 MHz, CDCl<sub>3</sub>) δ 176.18, 78.73, 44.65 (m, labeled), 44.59, 29.05 (m, labeled), 25.11 (m, labeled).

Deuterium incorporation: 6.6 D/molecule (<sup>1</sup>H-NMR, 400 MHz), 6.6 D/molecule (<sup>1</sup>H-NMR, 800 MHz), 6.6 D/molecule [HRMS (ESI)].

DYQ-1-71-1 #310-836 RT: 2.31-6.24 AV: 527 NL: 1.76E6  
T: FTMS + p ESI Full ms [100.00-500.00]

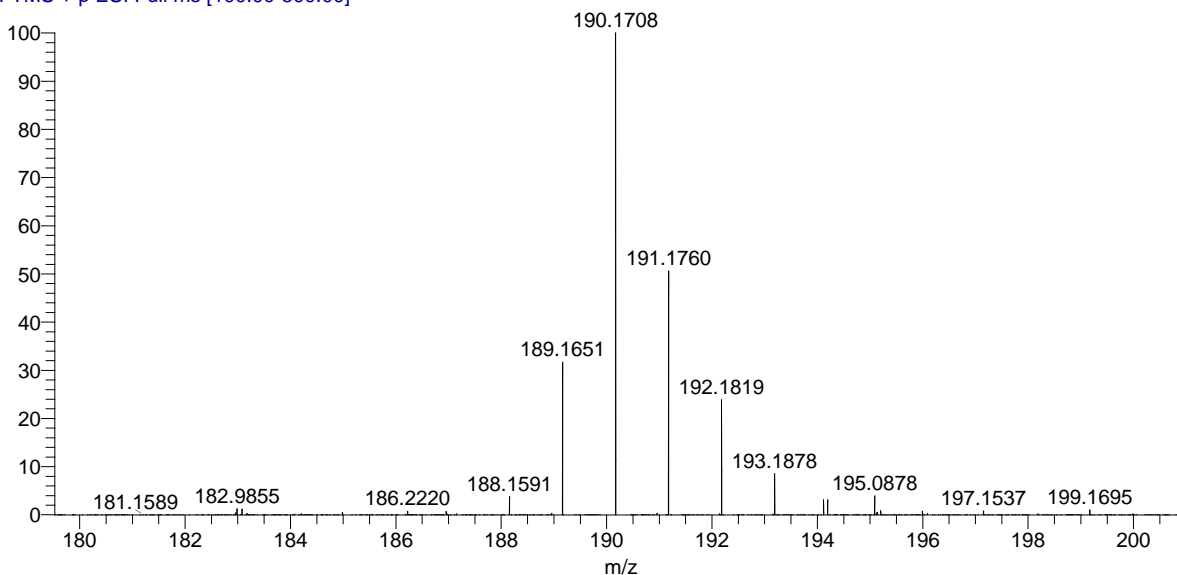

188.1591 (C<sub>10</sub>H<sub>13</sub>D<sub>4</sub>NO<sub>2</sub> + H<sup>+</sup>, 1%), 189.1651 (C<sub>10</sub>H<sub>12</sub>D<sub>5</sub>NO<sub>2</sub> + H<sup>+</sup>, 12%), 190.1708 (C<sub>10</sub>H<sub>11</sub>D<sub>6</sub>NO<sub>2</sub> + H<sup>+</sup>, 42%), 191.1760 (C<sub>10</sub>H<sub>10</sub>D<sub>7</sub>NO<sub>2</sub> + H<sup>+</sup>, 25%), 192.1819 (C<sub>10</sub>H<sub>9</sub>D<sub>8</sub>NO<sub>2</sub> + H<sup>+</sup>, 12%), 193.1878 (C<sub>10</sub>H<sub>8</sub>D<sub>9</sub>NO<sub>2</sub> + H<sup>+</sup>, 5%).

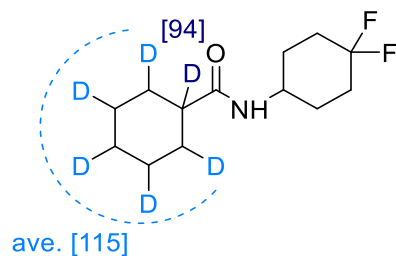

***N*-(4,4-difluorocyclohexyl)cyclohexane-1,2,3,4,5,6-*d*<sub>6</sub>-1-carboxamide (5b).** The title product was obtained with 99% yield (54.6 mg, 0.2 mmol scale) as white solid. <sup>1</sup>H NMR (400 MHz, CDCl<sub>3</sub>) δ 5.33 (d, *J* = 7.2 Hz, 1.00H), 4.13 (q, *J* = 7.2 Hz, 0.11H), 3.94-3.85 (m, 0.88H), 2.23 (t, *J* = 7.4 Hz, 0.06H), 2.12-1.75 (m, 6.52H), 1.67-1.64 (m, 0.79H), 1.54-1.44 (m, 1.80H), 1.38 (s, 1.23H), 1.28-1.21 (m, 1.18H); <sup>13</sup>C NMR (101 MHz, CDCl<sub>3</sub>) δ 175.86, 125.11, 122.73, 120.32, 46.04, 32.70, 32.46, 32.21, 29.26 (m, labeled), 28.99, 28.89, 25.26 (m, labeled). <sup>19</sup>F NMR (377 MHz, CDCl<sub>3</sub>) δ -94.48, -95.11, -101.08, -101.71.

Deuterium incorporation: 6.7 D/molecule (<sup>1</sup>H-NMR), 6.7 D/molecule [HRMS (ESI)].

DYQ-1-70-1 #530-817 RT: 3.96-6.08 AV: 288 NL: 1.08E7  
T: FTMS + p ESI Full ms [100.00-500.00]

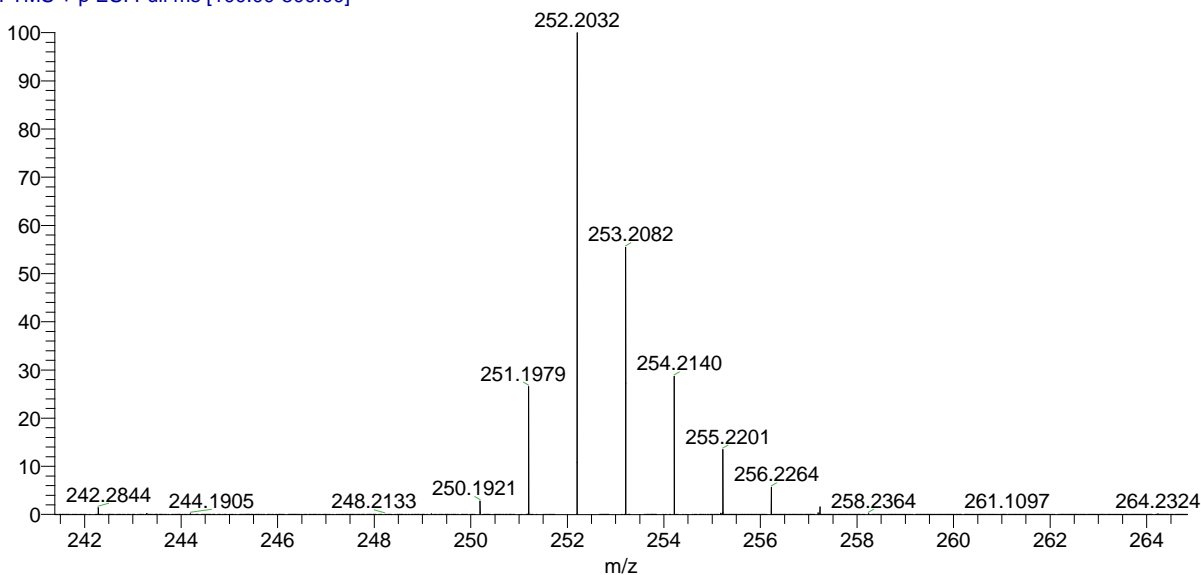

250.1921 (C<sub>13</sub>H<sub>17</sub>D<sub>4</sub>F<sub>2</sub>NO + H<sup>+</sup>, 1%), 251.1979 (C<sub>13</sub>H<sub>16</sub>D<sub>5</sub>F<sub>2</sub>NO + H<sup>+</sup>, 11%), 252.2032 (C<sub>13</sub>H<sub>15</sub>D<sub>6</sub>F<sub>2</sub>NO + H<sup>+</sup>, 43%), 253.2082 (C<sub>13</sub>H<sub>14</sub>D<sub>7</sub>F<sub>2</sub>NO + H<sup>+</sup>, 24%), 254.2140 (C<sub>13</sub>H<sub>13</sub>D<sub>8</sub>F<sub>2</sub>NO + H<sup>+</sup>, 12%), 255.2201 (C<sub>13</sub>H<sub>12</sub>D<sub>9</sub>F<sub>2</sub>NO + H<sup>+</sup>, 6%), 256.2264 (C<sub>13</sub>H<sub>11</sub>D<sub>10</sub>F<sub>2</sub>NO + H<sup>+</sup>, 2%).

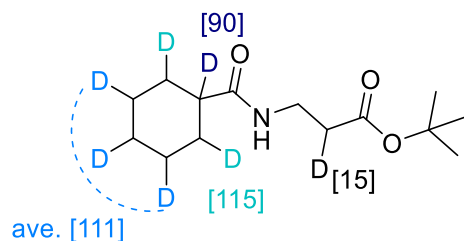

**tert-Butyl 3-(cyclohexane-1-carboxamido-1,2,3,4,5,6-*d*<sub>6</sub>)propanoate (6b).** The title product was obtained with 99% yield (53.0 mg, 0.2 mmol scale) as white solid. <sup>1</sup>H NMR (400 MHz, CDCl<sub>3</sub>) δ 6.10 (s, 0.90H), 3.46 (q, *J* = 6.0, 12.0 Hz, 2.00H), 2.42 (t, *J* = 6.0 Hz, 1.85H), 2.03 (t, *J* = 12.0 Hz, 0.10H), 1.83-1.79 (m, 0.15H), 1.79-1.71 (m, 1.26H), 1.65-1.60(m, 0.29H), 1.45 (s, 9.02H), 1.36 (s, 1.56H), 1.21-1.16 (m, 1.13H); <sup>13</sup>C NMR (101 MHz, CDCl<sub>3</sub>) δ 176.29, 172.38, 81.22, 45.12 (m, labeled), 35.31, 34.97, 29.86, 29.16 (m, labeled), 28.27, 25.22 (m, labeled).

Deuterium incorporation: 6.7 D/molecule (<sup>1</sup>H-NMR), 6.7 D/molecule [HRMS (ESI)]

DYQ-1-56-2 #722 RT: 5.39 AV: 1 NL: 4.98E7  
T: FTMS + p ESI Full ms [100.00-500.00]

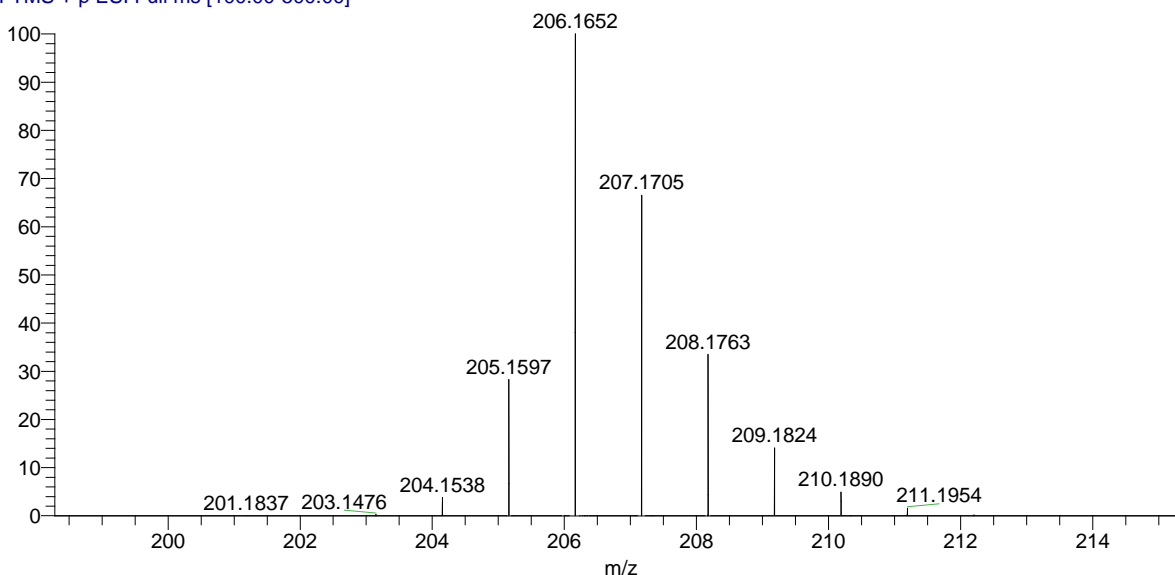

204.1538 (C<sub>14</sub>H<sub>21</sub>D<sub>4</sub>NO<sub>3</sub> + H<sup>+</sup>, 1%), 205.1597 (C<sub>14</sub>H<sub>20</sub>D<sub>5</sub>NO<sub>3</sub> + H<sup>+</sup>, 11%), 206.1652 (C<sub>14</sub>H<sub>19</sub>D<sub>6</sub>NO<sub>3</sub> + H<sup>+</sup>, 40%), 207.1705 (C<sub>14</sub>H<sub>18</sub>D<sub>7</sub>NO<sub>3</sub> + H<sup>+</sup>, 26%), 208.1763 (C<sub>14</sub>H<sub>17</sub>D<sub>8</sub>NO<sub>3</sub> + H<sup>+</sup>, 13%), 209.1824 (C<sub>14</sub>H<sub>16</sub>D<sub>9</sub>NO<sub>3</sub> + H<sup>+</sup>, 6%), 210.1890 (C<sub>14</sub>H<sub>15</sub>D<sub>10</sub>NO<sub>3</sub> + H<sup>+</sup>, 2%), 211.1954 (C<sub>14</sub>H<sub>14</sub>D<sub>11</sub>NO<sub>3</sub> + H<sup>+</sup>, 1%).

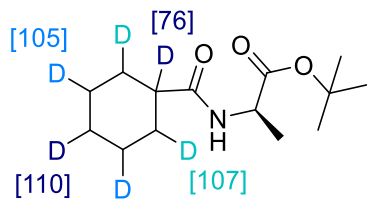

**tert-Butyl (cyclohexane-1-carboxyl-1,2,3,4,5,6-*d*<sub>6</sub>)-*D*-alaninate (7b).** The title product was obtained with 81% yield (61.0 mg, 0.4 mmol scale) as white solid. <sup>1</sup>H NMR (400 MHz, CDCl<sub>3</sub>) δ 6.13 (d, *J* = 7.2 Hz, 1.00H), 4.46-4.39 (m, 1.00H), 2.08-2.03 (m, 0.24H), 1.86-1.79 (m, 0.36H), 1.75-1.66 (m, 1.58H), 1.63-1.58 (m, 0.33H), 1.46 (s, 0.30H), 1.42 (s, 8.73H), 1.36 (s, 1.49H), 1.31 (d, *J* = 7.2 Hz, 2.97H), 1.20-1.14 (m, 1.06H); <sup>1</sup>H NMR (800 MHz, CDCl<sub>3</sub>) δ 6.09 (d, *J* = 7.2 Hz, 1.00H), 4.46-4.42 (m, 0.96H), 2.08-2.05 (m, 0.24H), 1.86-1.80 (m, 0.33H), 1.75-1.72 (m, 1.41H), 1.64-1.60 (m, 0.31H), 1.48 (s, 0.44H), 1.44 (s, 8.62H), 1.41-1.36 (m, 1.54H), 1.33 (d, *J* = 7.2 Hz, 2.97H), 1.21-1.20 (m, 0.49H), 1.15 (s, 0.59H); <sup>13</sup>C NMR (201 MHz, CDCl<sub>3</sub>) δ 175.61, 172.80, 82.01, 48.41, 44.80 (m, labeled), 29.14 (m, labeled), 28.12, 25.19 (m, labeled), 18.96.

Deuterium incorporation: 6.1 D/molecule (<sup>1</sup>H-NMR), 5.8 D/molecule [HRMS (ESI)].

bfx-8-48-2 #620-1169 RT: 4.63-8.68 AV: 550 NL: 8.51E6  
T: FTMS + p ESI Full ms [100.00-500.00]

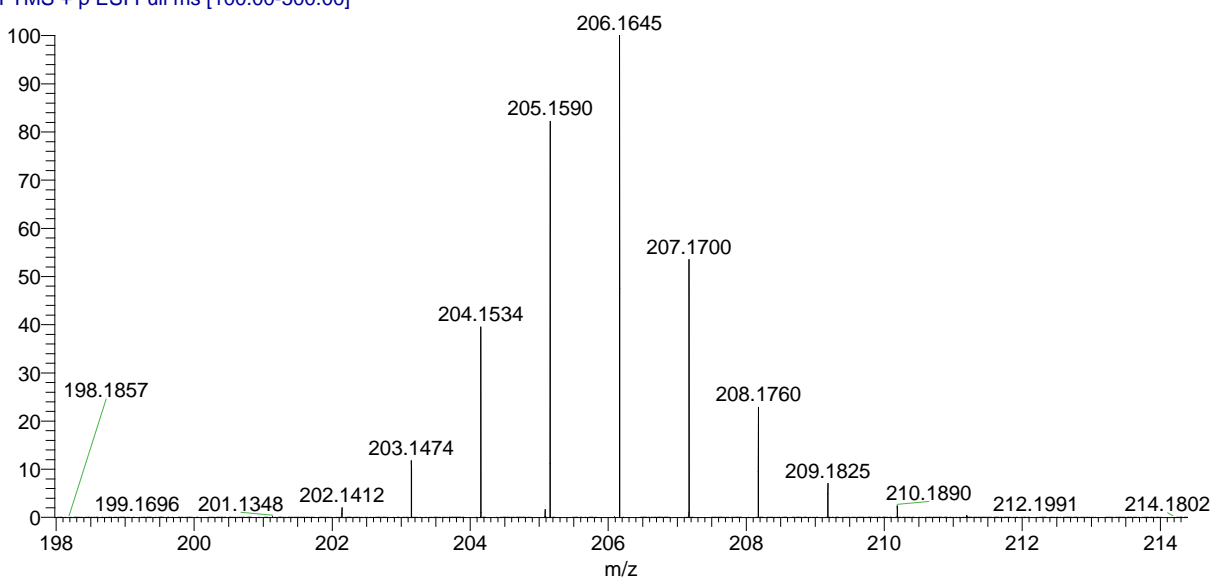

202.1412 (C<sub>14</sub>H<sub>23</sub>D<sub>2</sub>NO<sub>3</sub> + H<sup>+</sup>, 1%), 203.1474 (C<sub>14</sub>H<sub>22</sub>D<sub>3</sub>NO<sub>3</sub> + H<sup>+</sup>, 3%), 204.1534 (C<sub>14</sub>H<sub>21</sub>D<sub>4</sub>NO<sub>3</sub> + H<sup>+</sup>, 12%), 205.1590 (C<sub>14</sub>H<sub>20</sub>D<sub>5</sub>NO<sub>3</sub> + H<sup>+</sup>, 25%), 206.1645 (C<sub>14</sub>H<sub>19</sub>D<sub>6</sub>NO<sub>3</sub> + H<sup>+</sup>, 32%), 207.1700 (C<sub>14</sub>H<sub>18</sub>D<sub>7</sub>NO<sub>3</sub> + H<sup>+</sup>, 17%), 208.1760 (C<sub>14</sub>H<sub>17</sub>D<sub>8</sub>NO<sub>3</sub> + H<sup>+</sup>, 7%), 209.1825 (C<sub>14</sub>H<sub>16</sub>D<sub>9</sub>NO<sub>3</sub> + H<sup>+</sup>, 2%).

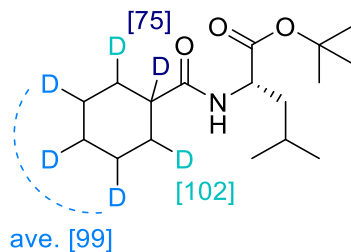

**tert-Butyl (cyclohexane-1-carbonyl-1,2,3,4,5,6-*d*<sub>6</sub>)-L-leucinate (8b).** The title product was obtained with 99% yield (119.7 mg, 0.4 mmol scale) as white solid. <sup>1</sup>H NMR (400 MHz, CDCl<sub>3</sub>) δ 5.85 (d, *J* = 8.4 Hz, 1.00H), 4.55-4.49 (m, 1.00H), 2.10 (t, *J* = 11.6 Hz, 0.25H), 1.91-1.83 (m, 0.37H), 1.77-1.74 (m, 1.42H), 1.69-1.57 (m, 2.42H), 1.52-1.44 (m, 10.00H), 1.40 (s, 1.60H), 1.24-1.17 (m, 1.18H), 0.94 (dd, *J* = 1.6, 6.4 Hz, 6.00H); <sup>1</sup>H NMR (800 MHz, CDCl<sub>3</sub>) δ 5.84 (d, *J* = 8.0 Hz, 1.00H), 4.53-4.50 (m, 0.99H), 2.11-2.08 (m, 0.22H), 1.87-1.82 (m, 0.31H), 1.78-1.74 (m, 1.33H), 1.67-1.59 (m, 2.26H), 1.49-1.46 (m, 10.06H), 1.43-1.38 (m, 1.64H), 1.24-1.23 (m, 0.53H), 1.18 (s, 0.55H), 0.95-0.94 (m, 6.03H); <sup>13</sup>C NMR (201 MHz, CDCl<sub>3</sub>) δ 175.86, 172.81, 81.98, 51.14, 42.36, 29.84 (m, labeled), 29.19 (m, labeled), 28.22, 25.71 (m, labeled), 25.28 (m, labeled), 25.20, 23.05, 22.43.

Deuterium incorporation: 6.2 D/molecule (<sup>1</sup>H-NMR), 6.0 D/molecule [HRMS (ESI)]

bfx-8-48-1 #816-950 RT: 6.10-7.08 AV: 135 NL: 1.29E7  
T: FTMS + p ESI Full ms [100.00-500.00]

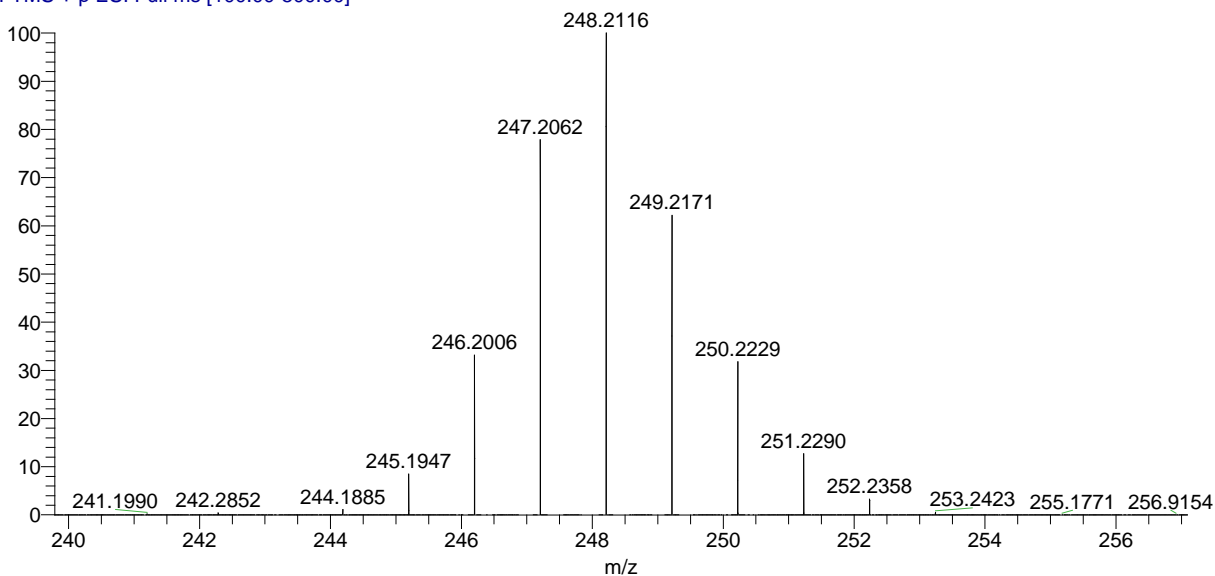

244.1885 ( $\text{C}_{13}\text{H}_{21}\text{D}_2\text{NO}_3 + \text{H}^+$ , < 1%), 245.1885 ( $\text{C}_{13}\text{H}_{20}\text{D}_3\text{NO}_3 + \text{H}^+$ , 3%), 246.2006 ( $\text{C}_{13}\text{H}_{19}\text{D}_4\text{NO}_3 + \text{H}^+$ , 10%), 247.2062 ( $\text{C}_{13}\text{H}_{18}\text{D}_5\text{NO}_3 + \text{H}^+$ , 24%), 248.2116 ( $\text{C}_{13}\text{H}_{17}\text{D}_6\text{NO}_3 + \text{H}^+$ , 30%), 249.2171 ( $\text{C}_{13}\text{H}_{16}\text{D}_7\text{NO}_3 + \text{H}^+$ , 19%), 250.2229 ( $\text{C}_{13}\text{H}_{15}\text{D}_8\text{NO}_3 + \text{H}^+$ , 9%), 251.2290 ( $\text{C}_{13}\text{H}_{14}\text{D}_9\text{NO}_3 + \text{H}^+$ , 4%), 252.2358 ( $\text{C}_{13}\text{H}_{13}\text{D}_{10}\text{NO}_3 + \text{H}^+$ , 1%),

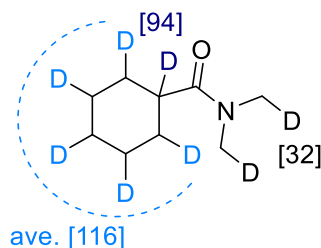

***N,N*-dimethylcyclohexane-1-carboxamide-1,2,3,4,5,6-*d*<sub>6</sub> (9b)**. The title product was obtained with 63% yield (40.6 mg, 0.4 mmol scale) as colorless liquid.  $^1\text{H}$  NMR (400 MHz,  $\text{CDCl}_3$ )  $\delta$  3.00 (s, 2.74H), 2.88 (s, 2.63H), 2.42 (t,  $J = 12.0$  Hz, 0.06H), 1.71 (s, 1.32H), 1.63-1.59(m, 0.37H), 1.41 (s, 1.53H), 1.19-1.16 (m, 0.98H);  $^{13}\text{C}$  NMR (201 MHz,  $\text{CDCl}_3$ )  $\delta$  176.26, 40.10 (m, labeled), 37.12, 35.56, 28.62 (m, labeled), 25.30 (m, labeled).

Deuterium incorporation: 7.4 D/molecule ( $^1\text{H}$ -NMR), 7.2 D/molecule [HRMS (ESI)]

BFX-3\_220303151926 #920-1132 RT: 3.91-4.79 AV: 213 NL: 2.97E7  
T: FTMS + p ESI Full ms [100.00-300.00]

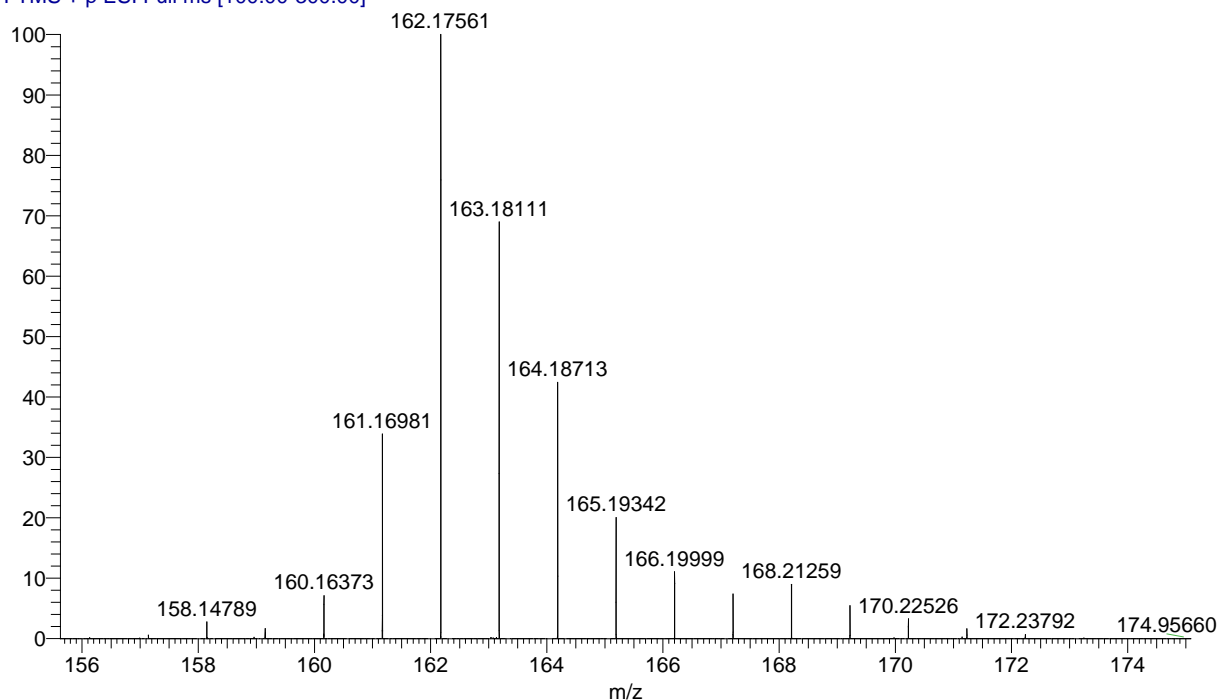

160.1637 ( $\text{C}_9\text{H}_{13}\text{D}_4\text{NO} + \text{H}^+$ , 2%), 161.1698 ( $\text{C}_9\text{H}_{12}\text{D}_5\text{NO} + \text{H}^+$ , 10%), 162.1756 ( $\text{C}_9\text{H}_{11}\text{D}_6\text{NO} + \text{H}^+$ , 32%), 163.1811 ( $\text{C}_9\text{H}_{10}\text{D}_7\text{NO} + \text{H}^+$ , 22%), 164.1871 ( $\text{C}_9\text{H}_9\text{D}_8\text{NO} + \text{H}^+$ , 14%), 165.1934 ( $\text{C}_9\text{H}_8\text{D}_9\text{NO} + \text{H}^+$ , 7%), 166.2000 ( $\text{C}_9\text{H}_7\text{D}_{10}\text{NO} + \text{H}^+$ , 4%), 167.2062 ( $\text{C}_9\text{H}_6\text{D}_{11}\text{NO} + \text{H}^+$ , 3%), 168.2126 ( $\text{C}_9\text{H}_5\text{D}_{12}\text{NO} + \text{H}^+$ , 3%), 169.2189 ( $\text{C}_9\text{H}_4\text{D}_{13}\text{NO} + \text{H}^+$ , 2%), 170.2253 ( $\text{C}_9\text{H}_3\text{D}_{14}\text{NO} + \text{H}^+$ , 1%).

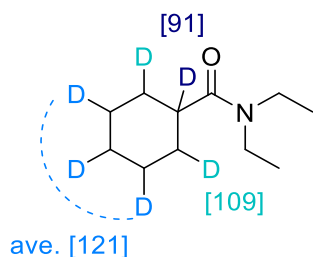

***N*-(2-Methoxyethyl)cyclohexane-1,2,3,4,5,6-*d*<sub>6</sub>-1-carboxamide (10b).** The title product was obtained with 99% yield (76.9 mg, 0.4 mmol scale) as white solid.  $^1\text{H}$  NMR (400 MHz,  $\text{CDCl}_3$ )  $\delta$  3.37-3.28 (m, 4.00H), 2.40-2.34 (m, 0.09H), 1.90 (s, 0.31H), 1.75 (s, 1.12H), 1.69-1.64 (m, 0.48H), 1.51 (s, 1.52H), 1.26-1.16 (m, 4.09H), 1.10-1.06 (m, 3.00H);  $^{13}\text{C}$  NMR (101 MHz,  $\text{CDCl}_3$ )  $\delta$  175.74, 41.83, 40.18, 29.17 (m, labeled), 25.42 (m, labeled), 15.21, 13.33.

Deuterium incorporation: 6.4 D/molecule ( $^1\text{H}$ -NMR), 6.4 D/molecule [HRMS (ESI)]

dyq-1-17-1 #1098-1449 RT: 4.66-6.12 AV: 352 NL: 1.84E7  
T: FTMS + p ESI Full ms [100.00-300.00]

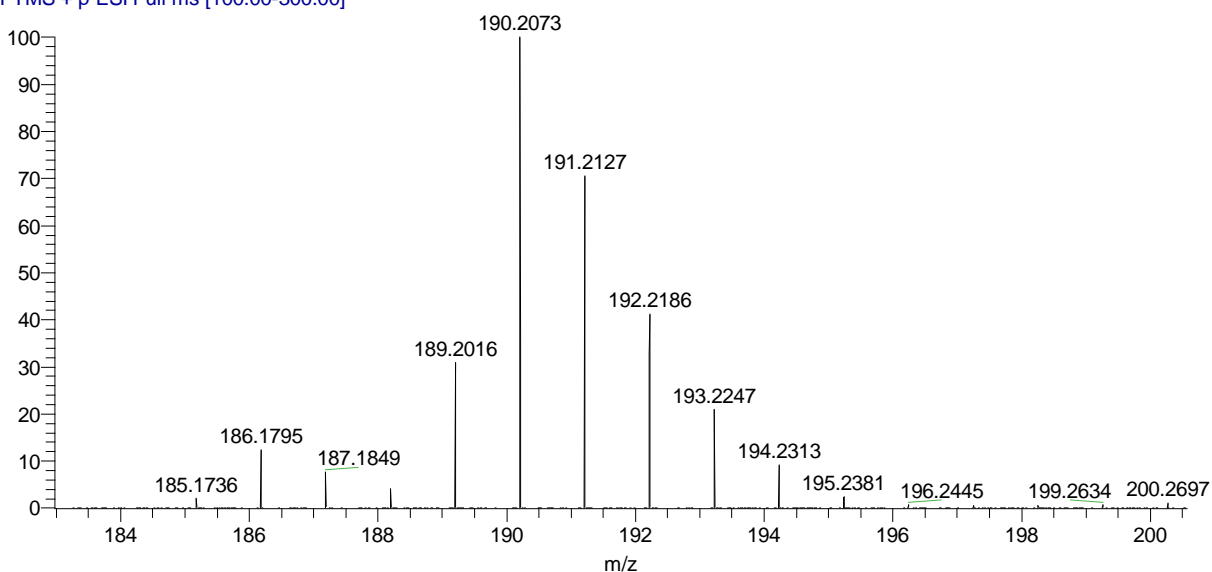

185.1736 ( $\text{C}_{11}\text{H}_{20}\text{DNO} + \text{H}^+$ , 1%), 186.1795 ( $\text{C}_{11}\text{H}_{19}\text{D}_2\text{NO} + \text{H}^+$ , 5%), 187.1849 ( $\text{C}_{11}\text{H}_{18}\text{D}_3\text{NO} + \text{H}^+$ , 4%), 188.1957 ( $\text{C}_{11}\text{H}_{17}\text{D}_4\text{NO} + \text{H}^+$ , 3%), 189.2016 ( $\text{C}_{11}\text{H}_{16}\text{D}_5\text{NO} + \text{H}^+$ , 11%), 190.2073

( $C_{11}H_{15}D_6NO + H^+$ , 30%), 191.2127 ( $C_{11}H_{14}D_7NO + H^+$ , 23%), 192.2186 ( $C_{11}H_{13}D_8NO + H^+$ , 13%), 193.2247 ( $C_{11}H_{12}D_9NO + H^+$ , 7%), 194.2313 ( $C_{11}H_{11}D_{10}NO + H^+$ , 3%), 195.2381 ( $C_{11}H_{10}D_{11}NO + H^+$ , 1%).

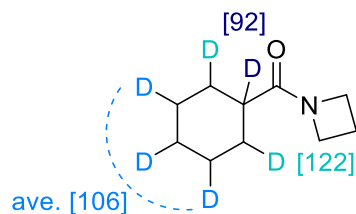

**Azetidin-1-yl(cyclohexyl-1,2,3,4,5,6-*d*<sub>6</sub>)methanone (11b).** The title product was obtained with 89% yield (61.8 mg, 0.4 mmol scale) as white solid.  $^1H$  NMR (400 MHz,  $CDCl_3$ )  $\delta$  4.13 (t,  $J = 7.6$  Hz, 2.00H), 3.97 (t,  $J = 7.6$  Hz, 1.99H), 2.27-2.19 (m, 2.01H), 2.11-2.05 (m, 0.08H), 2.02-1.96 (m, 0.03H), 1.72 (s, 1.32H), 1.66-1.60 (m, 0.45H), 1.41 (s, 1.53H), 1.17 (s, 1.05H);  $^{13}C$  NMR (201 MHz,  $CDCl_3$ )  $\delta$  176.28, 50.16, 47.79, 28.08 (m, labeled), 25.16 (m, labeled), 15.24.

Deuterium incorporation: 6.5 D/molecule ( $^1H$ -NMR), 6.5 D/molecule [HRMS (ESI)].

dyq-1-18-4 #900-1249 RT: 3.82-5.28 AV: 350 NL: 2.16E7  
T: FTMS + p ESI Full ms [100.00-300.00]

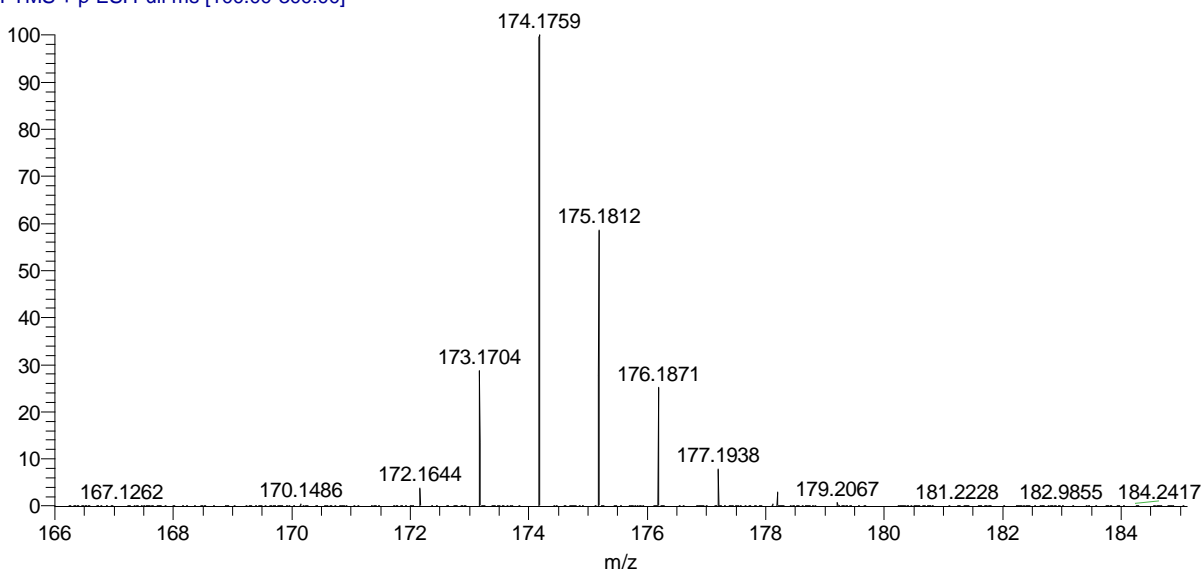

172.1644 ( $C_{10}H_{13}D_4NO + H^+$ , 2%), 173.1704 ( $C_{10}H_{12}D_5NO + H^+$ , 12%), 174.1759 ( $C_{10}H_{11}D_6NO + H^+$ , 44%), 175.1812 ( $C_{10}H_{10}D_7NO + H^+$ , 25%), 176.1871 ( $C_{10}H_9D_8NO + H^+$ , 12%), 177.1938 ( $C_{10}H_8D_9NO + H^+$ , 3%).



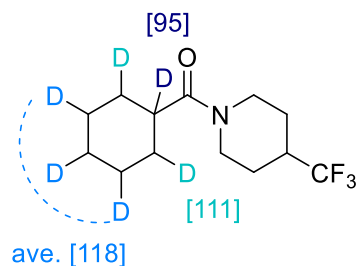

**(Cyclohexyl-1,2,3,4,5,6-*d*<sub>6</sub>)(4-(trifluoromethyl)piperidin-1-yl)methanone (12b).** The title product was obtained with 79% yield (85.0 mg, 0.4 mmol scale) as white solid. <sup>1</sup>H NMR (400 MHz, CDCl<sub>3</sub>) δ 4.75 (d, *J* = 13.2 Hz, 1.00H), 4.01 (d, *J* = 13.6 Hz, 1.00H), 3.00 (t, *J* = 13.0 Hz, 1.00H), 2.52-2.40 (m, 1.05H), 2.33-2.18 (m, 1.01H), 1.95-1.87 (m, 2.24H), 1.75 (s, 1.23H), 1.67-1.64 (m, 0.36H), 1.53-1.40 (m, 3.55H), 1.21 (s, 0.87H); <sup>13</sup>C NMR (101 MHz, CDCl<sub>3</sub>) δ 174.79, 127.14 (q, *J* = 279.30 Hz), 44.34, 41.28, 41.00, 40.73, 40.65, 40.46, 40.01 (m, labeled), 28.98 (m, labeled), 25.64, 25.32 (m, labeled), 24.48. <sup>19</sup>F NMR (376 MHz, CDCl<sub>3</sub>) δ -73.89.

Deuterium incorporation: 6.7 D/molecule (<sup>1</sup>H-NMR), 6.9 D/molecule [HRMS (ESI)].

DYQ-1-70-2 #786 RT: 5.87 AV: 1 NL: 1.19E7  
T: FTMS + p ESI Full ms [100.00-350.00]

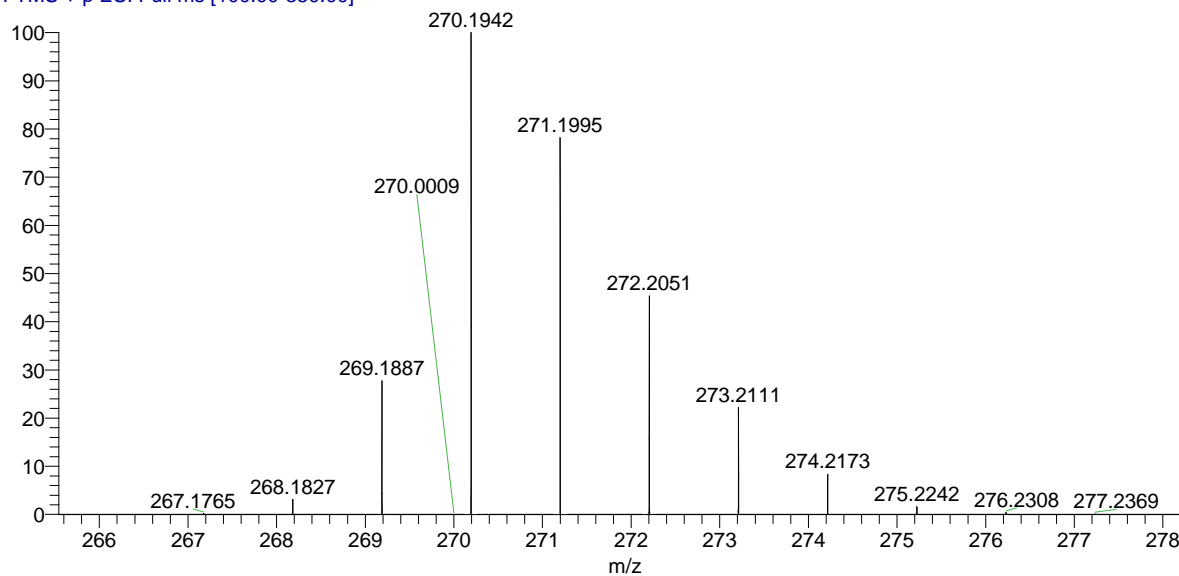

268.1827 (C<sub>13</sub>H<sub>16</sub>D<sub>4</sub>F<sub>3</sub>NO + H<sup>+</sup>, 1%), 269.1887 (C<sub>13</sub>H<sub>15</sub>D<sub>5</sub>F<sub>3</sub>NO + H<sup>+</sup>, 9%), 270.1942 (C<sub>13</sub>H<sub>14</sub>D<sub>6</sub>F<sub>3</sub>NO + H<sup>+</sup>, 34%), 271.1995 (C<sub>13</sub>H<sub>13</sub>D<sub>7</sub>F<sub>3</sub>NO + H<sup>+</sup>, 27%), 272.2051 (C<sub>13</sub>H<sub>12</sub>D<sub>8</sub>F<sub>3</sub>NO + H<sup>+</sup>, 16%), 273.2111 (C<sub>13</sub>H<sub>11</sub>D<sub>9</sub>F<sub>3</sub>NO + H<sup>+</sup>, 8%), 274.2173 (C<sub>13</sub>H<sub>10</sub>D<sub>10</sub>F<sub>3</sub>NO + H<sup>+</sup>, 3%), 275.2242 (C<sub>13</sub>H<sub>9</sub>D<sub>11</sub>F<sub>3</sub>NO + H<sup>+</sup>, 1%).

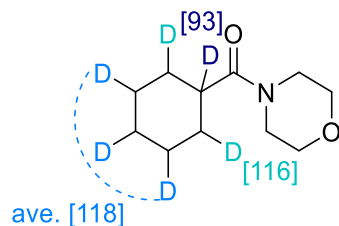

**(Cyclohexyl-1,2,3,4,5,6-*d*<sub>6</sub>)(morpholino)methanone (13b).** The title product was obtained with 86% yield (70.1 mg, 0.4 mmol scale) as white solid. <sup>1</sup>H NMR (400 MHz, CDCl<sub>3</sub>) δ 3.66-3.47 (m, 8.00H), 2.42-2.37 (m, 0.07H), 2.02-1.90 (m, 0.16H), 1.75 (s, 1.22H), 1.70-1.63 (m, 0.38H), 1.48 (s, 1.52H), 1.20 (s, 0.87H); <sup>13</sup>C NMR (101 MHz, CDCl<sub>3</sub>) δ 174.92, 67.17, 67.04, 46.00, 42.00, 39.89 (m, labeled), 28.80 (m, labeled), 25.28 (m, labeled).

Deuterium incorporation: 6.8 D/molecule (<sup>1</sup>H-NMR), 6.8 D/molecule [HRMS (ESI)]

Bfx-16-4 #866-1156 RT: 3.69-4.93 AV: 291 NL: 2.86E6  
T: FTMS + p ESI Full ms [100.00-300.00]

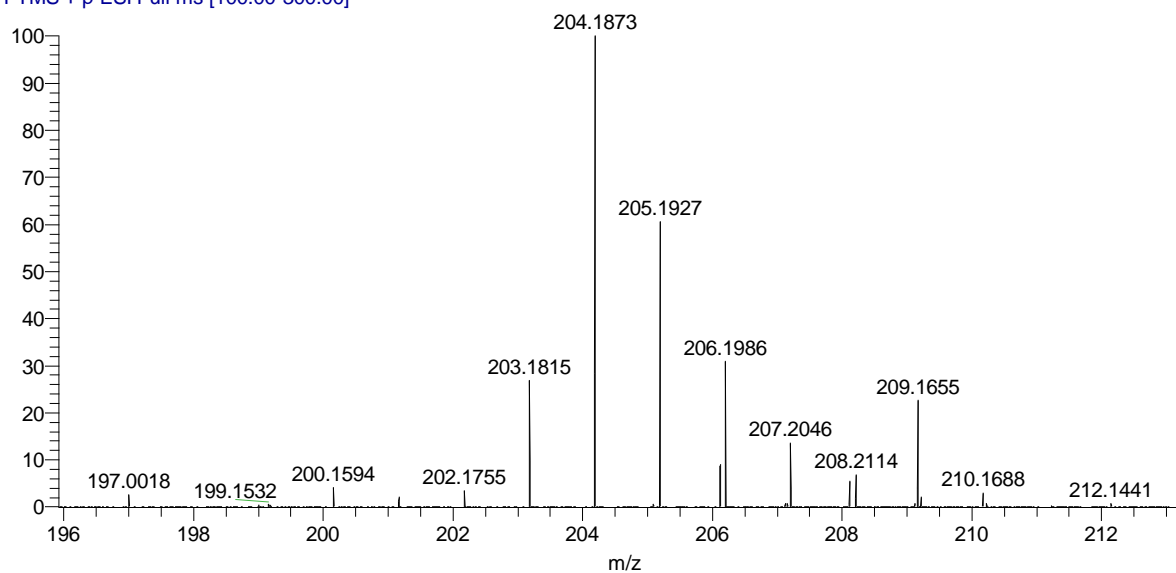

202.1755 (C<sub>11</sub>H<sub>15</sub>D<sub>4</sub>NO<sub>2</sub> + H<sup>+</sup>, 1%), 203.1815 (C<sub>11</sub>H<sub>14</sub>D<sub>5</sub>NO<sub>2</sub> + H<sup>+</sup>, 10%), 204.1873 (C<sub>11</sub>H<sub>13</sub>D<sub>6</sub>NO<sub>2</sub> + H<sup>+</sup>, 39%), 205.1927 (C<sub>11</sub>H<sub>12</sub>D<sub>7</sub>NO<sub>2</sub> + H<sup>+</sup>, 26%), 206.1986 (C<sub>11</sub>H<sub>11</sub>D<sub>8</sub>NO<sub>2</sub> + H<sup>+</sup>, 13%), 207.2046 (C<sub>11</sub>H<sub>10</sub>D<sub>9</sub>NO<sub>2</sub> + H<sup>+</sup>, 6%), 208.2114 (C<sub>11</sub>H<sub>9</sub>D<sub>10</sub>NO<sub>2</sub> + H<sup>+</sup>, 3%).

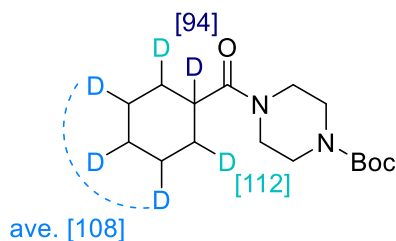

***tert*-Butyl 4-(cyclohexane-1-carbonyl-1,2,3,4,5,6-*d*<sub>6</sub>)piperazine-1-carboxylate (**14b**)**, The title product was obtained with 86% yield (106.6 mg, 0.4 mmol scale) as white solid. <sup>1</sup>H NMR (400 MHz, CDCl<sub>3</sub>) δ 3.58-3.56 (m, 2.00H), 3.44-3.37 (m, 6.00H), 2.42 (t, *J* = 11.6 Hz, 0.06H), 1.75 (s, 1.28H), 1.70-1.63 (m, 0.42H), 1.49-1.46 (m, 10.76H), 1.20 (s, 1.05H); <sup>13</sup>C NMR (101 MHz, CDCl<sub>3</sub>) δ 175.02, 154.78, 80.41, 45.35, 43.70 (m, labeled), 41.52, 28.92 (m, labeled), 28.56, 25.32 (m, labeled).

Deuterium incorporation: 6.5 D/molecule (<sup>1</sup>H-NMR), 6.2 D/molecule [HRMS (ESI)].

dyq-1-17-2 #1197-1398 RT: 5.12-5.97 AV: 202 NL: 1.39E6  
T: FTMS + p ESI Full ms [200.00-400.00]

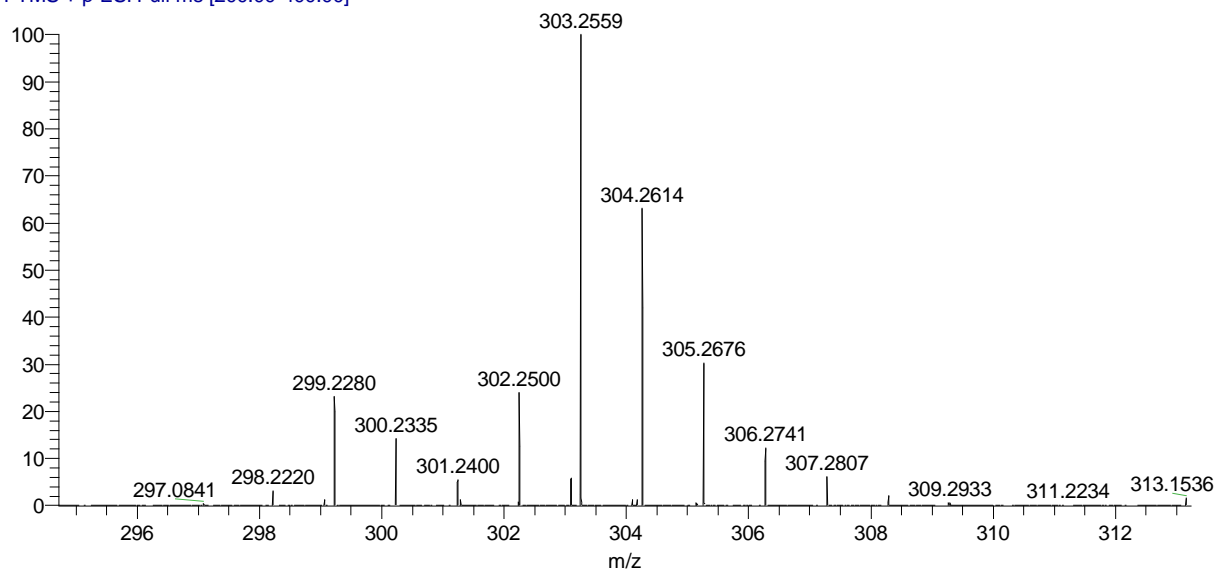

298.2220 (C<sub>16</sub>H<sub>27</sub>DN<sub>2</sub>O<sub>3</sub> + H<sup>+</sup>, 1%), 299.2280 (C<sub>16</sub>H<sub>26</sub>D<sub>2</sub>N<sub>2</sub>O<sub>3</sub> + H<sup>+</sup>, 8%), 300.2335 (C<sub>16</sub>H<sub>25</sub>D<sub>3</sub>N<sub>2</sub>O<sub>3</sub> + H<sup>+</sup>, 13%), 301.2400 (C<sub>16</sub>H<sub>24</sub>D<sub>4</sub>N<sub>2</sub>O<sub>3</sub> + H<sup>+</sup>, <1%), 302.2500 (C<sub>16</sub>H<sub>23</sub>D<sub>5</sub>N<sub>2</sub>O<sub>3</sub> + H<sup>+</sup>, 9%), 303.2559 (C<sub>16</sub>H<sub>22</sub>D<sub>6</sub>N<sub>2</sub>O<sub>3</sub> + H<sup>+</sup>, 37%), 304.2614 (C<sub>16</sub>H<sub>21</sub>D<sub>7</sub>N<sub>2</sub>O<sub>3</sub> + H<sup>+</sup>, 24%), 305.2676 (C<sub>16</sub>H<sub>20</sub>D<sub>8</sub>N<sub>2</sub>O<sub>3</sub> + H<sup>+</sup>, 11%), 306.2741 (C<sub>16</sub>H<sub>19</sub>D<sub>9</sub>N<sub>2</sub>O<sub>3</sub> + H<sup>+</sup>, 5%), 307.2807 (C<sub>16</sub>H<sub>18</sub>D<sub>10</sub>N<sub>2</sub>O<sub>3</sub> + H<sup>+</sup>, 2%).

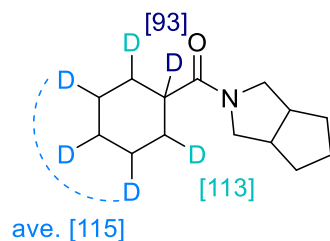

**(Cyclohexyl-1,2,3,4,5,6-*d*<sub>6</sub>)(hexahydrocyclopenta[*c*]pyrrol-2(1*H*)-yl)methanone (15b).** The title product was obtained with 98% yield (89.0 mg, 0.4 mmol scale) as white solid. <sup>1</sup>H NMR (400 MHz, CDCl<sub>3</sub>) δ 3.86-3.41 (m, 2.02H), 3.26-2.98 (m, 1.99H), 2.71-2.53 (m, 2.00H), 2.26 (t, *J* = 11.6 Hz, 0.08H), 1.86-1.53 (m, 5.70H), 1.45-1.39 (m, 3.57H), 1.18 (s, 0.93H); <sup>1</sup>H NMR (800 MHz, CDCl<sub>3</sub>) δ 3.67-3.62 (m, 2.00H), 3.28-3.22 (m, 2.00H), 2.71-2.67 (m, 1.00H), 2.62-2.58 (m, 1.00H), 2.30-2.27 (m, 0.07H), 1.93-1.92 (m, 0.21H), 1.86-1.79 (m, 2.01H), 1.76-1.67 (m, 2.47H), 1.63-1.58 (m, 1.17H), 1.47-1.41 (m, 3.54H), 1.20 (s, 0.92H); <sup>13</sup>C NMR (101 MHz, CDCl<sub>3</sub>) δ 174.84, 52.51, 51.62, 43.80, 42.16 (m, labeled), 41.78, 32.16, 32.14, 28.42 (m, labeled), 25.59, 25.30 (m, labeled).

Deuterium incorporation: 6.7 D/molecule (<sup>1</sup>H-NMR, 400 MHz), 6.6 D/molecule (<sup>1</sup>H-NMR, 800 MHz), 6.6 D/molecule [HRMS (ESI)].

DYQ-1-87-2\_220713145335 #777 RT: 5.79 AV: 1 NL: 1.52E8  
T: FTMS + p ESI Full ms [100.00-500.00]

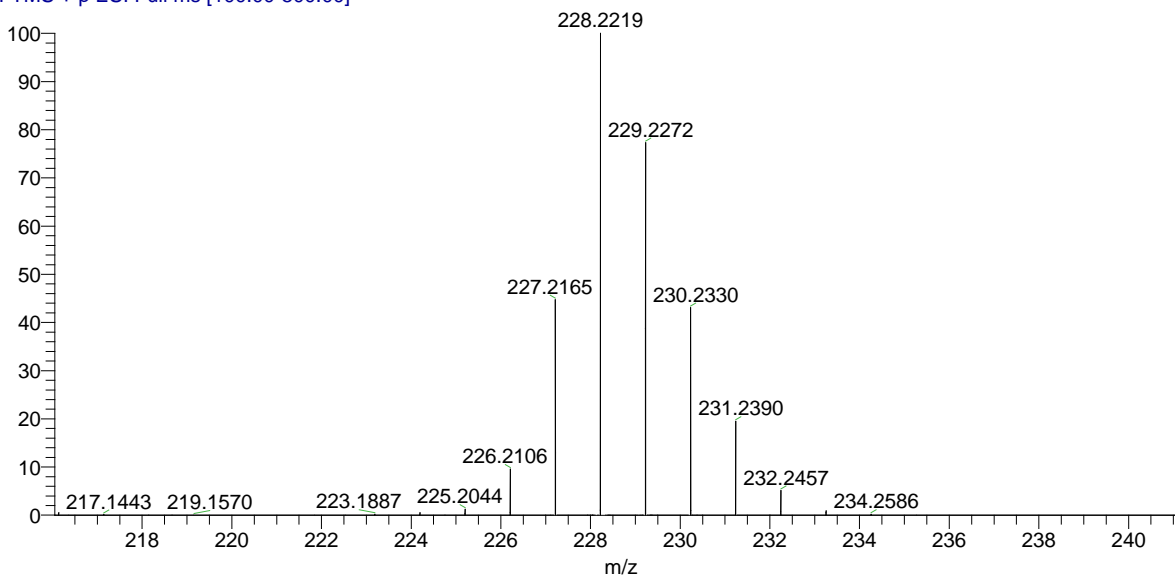

226.2106 ( $\text{C}_{14}\text{H}_{19}\text{D}_4\text{NO} + \text{H}^+$ , 3%), 227.2165 ( $\text{C}_{14}\text{H}_{18}\text{D}_5\text{NO} + \text{H}^+$ , 14%), 228.2219 ( $\text{C}_{14}\text{H}_{17}\text{D}_6\text{NO} + \text{H}^+$ , 33%), 229.2272 ( $\text{C}_{14}\text{H}_{16}\text{D}_7\text{NO} + \text{H}^+$ , 25%), 230.2330 ( $\text{C}_{14}\text{H}_{15}\text{D}_8\text{NO} + \text{H}^+$ , 15%), 231.2390 ( $\text{C}_{14}\text{H}_{14}\text{D}_9\text{NO} + \text{H}^+$ , 7%), 232.2457 ( $\text{C}_{14}\text{H}_{13}\text{D}_{10}\text{NO} + \text{H}^+$ , 2%).

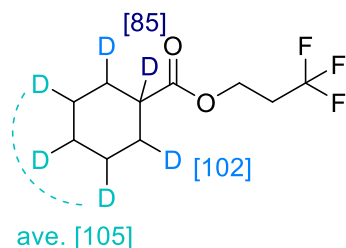

**3,3,3-Trifluoropropyl cyclohexane-1-carboxylate-1,2,3,4,5,6- $d_6$  (16b).** The title product was obtained with 82% yield (75.5 mg, 0.4 mmol scale) as colorless liquid.  $^1\text{H}$  NMR (400 MHz,  $\text{CDCl}_3$ )  $\delta$  4.29 (t,  $J = 6.2$  Hz, 2.00H), 2.52-2.41 (m, 2.01H), 2.32-2.27 (m, 0.15H), 1.91-1.86 (m, 0.29H), 1.77-1.71 (m, 1.32H), 1.66-1.61 (m, 0.32H), 1.43-1.40 (m, 1.68H), 1.19 (s, 1.21H);  $^{13}\text{C}$  NMR (101 MHz,  $\text{CDCl}_3$ )  $\delta$  175.97, 126.05 (q,  $J = 277.8$  Hz), 57.06 (q,  $J = 3.7$  Hz), 43.00 (m, labeled), 33.60 (q,  $J = 29.3$  Hz), 28.22 (m, labeled), 24.73 (m, labeled).

Deuterium incorporation: 6.0 D/molecule ( $^1\text{H}$ -NMR), 5.8 D/molecule [HRMS (ESI)].

DYQ-1-129-2\_221214173512 #1531 RT: 6.53 AV: 1 NL: 1.41E4  
T: FTMS + p ESI Full ms [50.00-500.00]

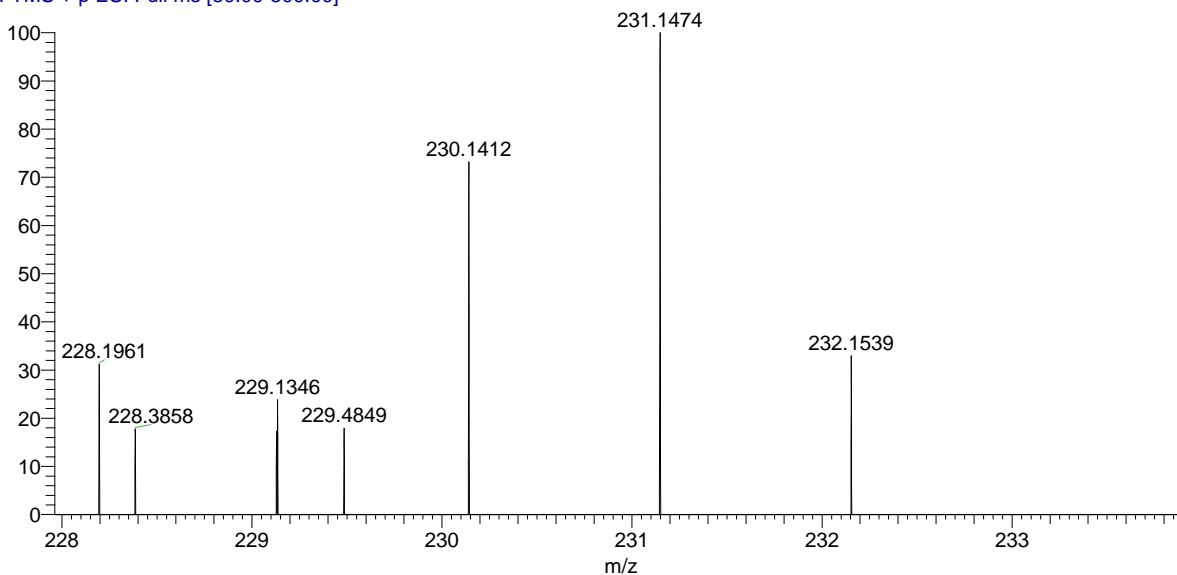

229.1346 ( $\text{C}_{10}\text{H}_{11}\text{D}_4\text{F}_3\text{O}_2 + \text{H}^+$ , 1%), 230.1412 ( $\text{C}_{10}\text{H}_{10}\text{D}_5\text{F}_3\text{O}_2 + \text{H}^+$ , 32%), 231.1474 ( $\text{C}_{10}\text{H}_9\text{D}_6\text{F}_3\text{O}_2 + \text{H}^+$ , 54%), 232.1539 ( $\text{C}_{10}\text{H}_8\text{D}_7\text{F}_3\text{O}_2 + \text{H}^+$ , 12%).

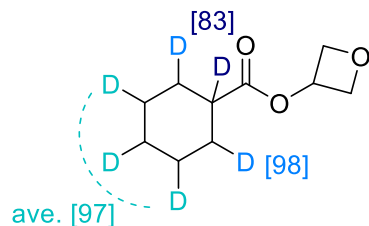

**Oxetan-3-yl cyclohexane-1-carboxylate-1,2,3,4,5,6-*d*<sub>6</sub> (17b).** The title product was obtained with 60% yield (45.6 mg, 0.4 mmol scale) as colorless liquid. <sup>1</sup>H NMR (400 MHz, CDCl<sub>3</sub>) δ 5.45-5.39 (m, 0.99H), 4.90 (t, *J* = 7.4 Hz, 2.00H), 4.62 (dd, *J* = 6.4, 8.4 Hz, 2.00H), 2.36-2.30 (m, 0.17H), 1.93-1.89 (m, 0.27H), 1.78-1.72 (m, 1.49H), 1.67-1.63 (m, 0.71H), 1.42 (s, 1.77H), 1.20 (s, 0.88H); <sup>13</sup>C NMR (101 MHz, CDCl<sub>3</sub>) δ 175.69, 77.92, 67.75, 43.60 (m, labeled), 28.43 (m, labeled), 24.97 (m, labeled).

Deuterium incorporation: 5.7 D/molecule (<sup>1</sup>H-NMR), 6.0 D/molecule [HRMS (ESI)].

Dyq-1-127-4\_221031184434 #1205 RT: 5.14 AV: 1 NL: 1.12E7  
T: FTMS + p ESI Full ms [100.00-500.00]

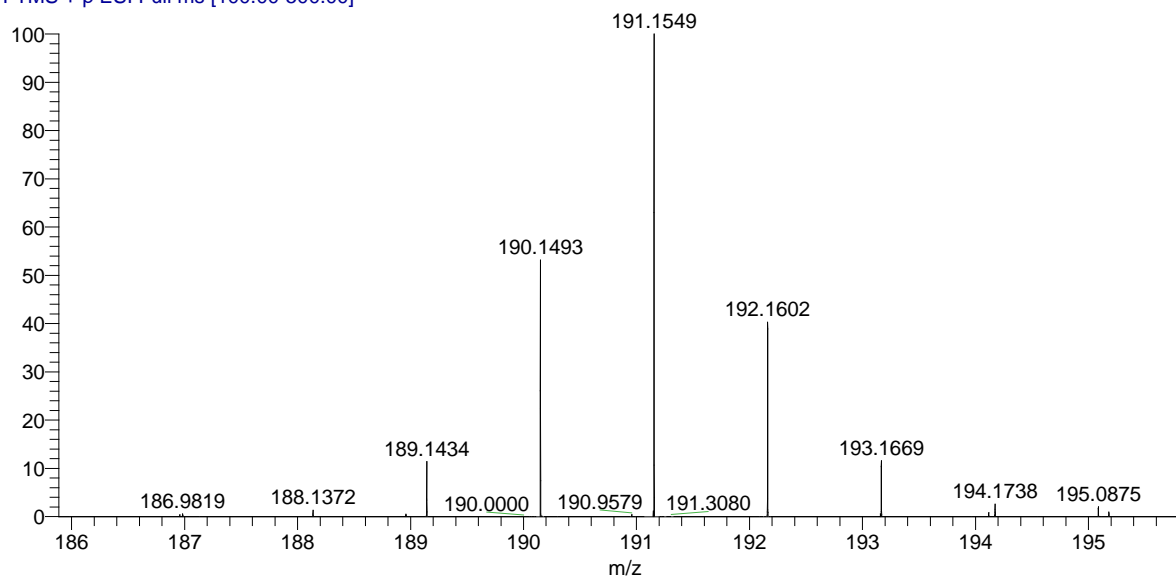

188.1372 (C<sub>10</sub>H<sub>13</sub>D<sub>3</sub>O<sub>3</sub> + H<sup>+</sup>, 1%), 189.1434 (C<sub>10</sub>H<sub>12</sub>D<sub>4</sub>O<sub>3</sub> + H<sup>+</sup>, 5%), 190.1493 (C<sub>10</sub>H<sub>11</sub>D<sub>5</sub>O<sub>3</sub> + H<sup>+</sup>, 23%), 191.1549 (C<sub>10</sub>H<sub>10</sub>D<sub>6</sub>O<sub>3</sub> + H<sup>+</sup>, 47%), 192.1602 (C<sub>10</sub>H<sub>9</sub>D<sub>7</sub>O<sub>3</sub> + H<sup>+</sup>, 17%), 193.1669 (C<sub>10</sub>H<sub>8</sub>D<sub>8</sub>O<sub>3</sub> + H<sup>+</sup>, 5%), 194.1738 (C<sub>10</sub>H<sub>7</sub>D<sub>9</sub>O<sub>3</sub> + H<sup>+</sup>, 1%).

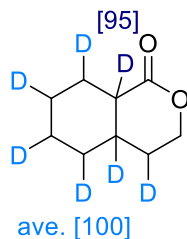

**Octahydro-1H-isochromen-1-one-4,4a,5,6,7,8,8a-*d*<sub>7</sub> (18b).** The title product was obtained with 84% yield (54.0 mg, 0.4 mmol scale) as white solid. <sup>1</sup>H NMR (400 MHz, CDCl<sub>3</sub>) δ 4.39-4.22 (m, 2.00H), 2.69-2.67 (m, 0.05H), 2.32-2.16 (m, 2.20H), 2.03-1.97 (m, 0.15H), 1.79 (s, 0.15H), 1.72-1.62 (m, 2.00H), 1.45 (s, 0.34H), 1.20 (s, 0.19H); <sup>13</sup>C NMR (101 MHz, CDCl<sub>3</sub>) δ 165.83, 151.64, 124.30, 66.93, 66.88, 65.60, 65.55, 65.50, 30.11 (m, labeled), 29.30, 28.95 (m, labeled), 23.13 (m, labeled), 21.39 (m, labeled).

Deuterium incorporation: 6.9 D/molecule (<sup>1</sup>H-NMR).

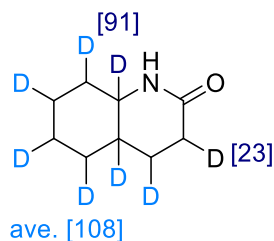

**Octahydroquinolin-2(1H)-one-4,4a,5,6,7,8,8a-*d*<sub>7</sub> (19b).** The title product was obtained with 96% yield (61.4 mg, 0.4 mmol scale) as white solid. <sup>1</sup>H NMR (400 MHz, CDCl<sub>3</sub>) δ 6.61 (s, 1.00H), 3.46 (s, 0.09H), 2.40-2.25 (m, 1.77H), 1.90-1.77 (m, 0.64H), 1.70-1.63 (m, 0.48H), 1.59-1.40 (m, 2.64H), 1.34-1.28 (m, 0.44H); <sup>13</sup>C NMR (201 MHz, CDCl<sub>3</sub>) δ 172.94, 51.94 (m, labeled), 32.30 (m, labeled), 30.79 (m, labeled), 28.88 (m, labeled), 26.09 (m, labeled), 23.99 (m, labeled), 22.75 (m, labeled), 20.81 (m, labeled).

Deuterium incorporation: 7.9 D/molecule (<sup>1</sup>H-NMR), 8.5 D/molecule [HRMS (ESI)]

DYQ-1-55-3 #484-748 RT: 3.61-5.54 AV: 265 NL: 1.37E7  
T: FTMS + p ESI Full ms [100.00-500.00]

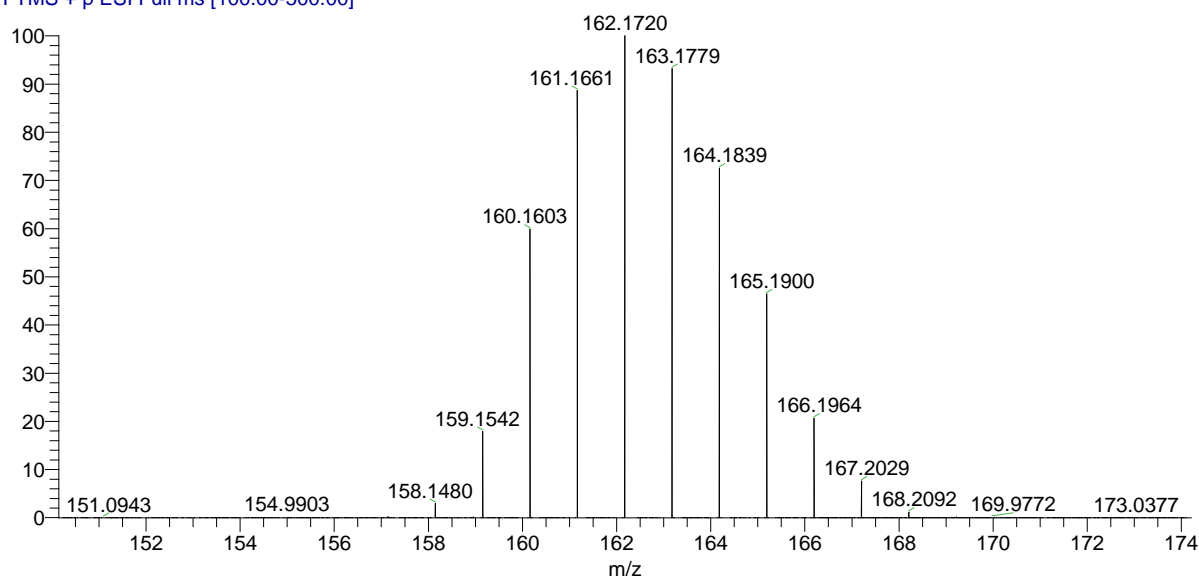

158.1480 ( $\text{C}_9\text{H}_{11}\text{D}_4\text{NO} + \text{H}^+$ , 1%), 159.1542 ( $\text{C}_9\text{H}_{10}\text{D}_5\text{NO} + \text{H}^+$ , 3%), 160.1603 ( $\text{C}_9\text{H}_9\text{D}_6\text{NO} + \text{H}^+$ , 12%), 161.1661 ( $\text{C}_9\text{H}_8\text{D}_7\text{NO} + \text{H}^+$ , 17%), 162.1720 ( $\text{C}_9\text{H}_7\text{D}_8\text{NO} + \text{H}^+$ , 20%), 163.1779 ( $\text{C}_9\text{H}_6\text{D}_9\text{NO} + \text{H}^+$ , 18%), 164.1839 ( $\text{C}_9\text{H}_5\text{D}_{10}\text{NO} + \text{H}^+$ , 14%), 165.1900 ( $\text{C}_9\text{H}_4\text{D}_{11}\text{NO} + \text{H}^+$ , 9%), 166.1964 ( $\text{C}_9\text{H}_3\text{D}_{12}\text{NO} + \text{H}^+$ , 4%), 167.2029 ( $\text{C}_9\text{H}_2\text{D}_{13}\text{NO} + \text{H}^+$ , 2%).

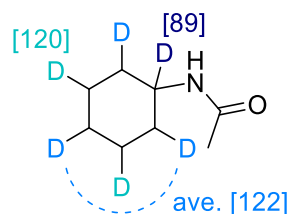

***N*-(cyclohexyl-1,2,3,4,5,6-*d*<sub>6</sub>)acetamide (20b).** The title product was obtained with 89% yield (50.5 mg, 0.4 mmol scale) as white solid.  $^1\text{H}$  NMR (400 MHz,  $\text{CDCl}_3$ )  $\delta$  5.60 (s, 1.00H), 3.75-3.67 (m, 0.11H), 2.01 (s, 0.10H), 1.93 (s, 2.88H), 1.89-1.84 (m, 0.33H), 1.69-1.64 (m, 1.05H), 1.59-1.55 (m, 0.31H), 1.35-1.23 (m, 0.55H), 1.14-1.06 (m, 1.69H);  $^{13}\text{C}$  NMR (101 MHz,  $\text{CDCl}_3$ )  $\delta$  169.27, 32.67 (m, labeled), 29.77 (m, labeled), 24.87 (m, labeled), 23.84.

Deuterium incorporation: 7.0 D/molecule ( $^1\text{H}$ -NMR), 7.1 D/molecule [HRMS (ESI)].



Dyq-1-19-1 #810 RT: 3.45 AV: 1 NL: 1.92E7  
T: FTMS + p ESI Full ms [100.00-300.00]

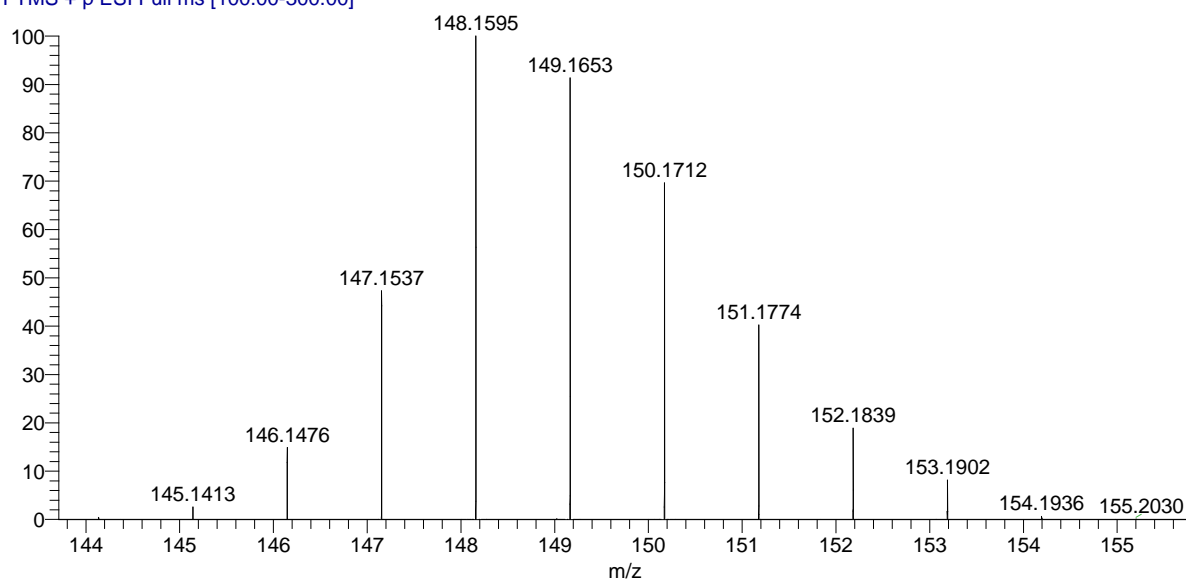

145.1413 ( $\text{C}_8\text{H}_{12}\text{D}_3\text{NO} + \text{H}^+$ , 1%), 146.1476 ( $\text{C}_8\text{H}_{11}\text{D}_4\text{NO} + \text{H}^+$ , 5%), 147.1537 ( $\text{C}_8\text{H}_{10}\text{D}_5\text{NO} + \text{H}^+$ , 17%), 148.1595 ( $\text{C}_8\text{H}_9\text{D}_6\text{NO} + \text{H}^+$ , 37%), 149.1653 ( $\text{C}_8\text{H}_8\text{D}_7\text{NO} + \text{H}^+$ , 36%), 150.1712 ( $\text{C}_8\text{H}_7\text{D}_8\text{NO} + \text{H}^+$ , 27%), 151.1774 ( $\text{C}_8\text{H}_6\text{D}_9\text{NO} + \text{H}^+$ , 17%), 152.1839 ( $\text{C}_8\text{H}_5\text{D}_{10}\text{NO} + \text{H}^+$ , 9%), 153.1902 ( $\text{C}_8\text{H}_4\text{D}_{11}\text{NO} + \text{H}^+$ , 4%).

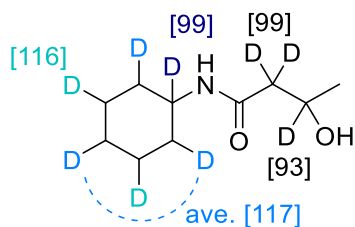

***N*-(cyclohexyl-1,2,3,4,5,6-*d*<sub>6</sub>)-3-hydroxybutanamide (21b).** The title product was obtained with 71% yield (60.1 mg, 0.4 mmol scale) as white solid.  $^1\text{H}$  NMR (400 MHz,  $\text{CDCl}_3$ )  $\delta$  5.91 (s, 1.00H), 4.09-4.05 (s, 1.00H), 3.77-3.70 (m, 0.07H), 2.24 (d,  $J = 29.2$  Hz, 0.03H), 1.89-1.84 (m, 0.28H), 1.65 (s, 1.17H), 1.60-1.56 (m, 0.35H), 1.34-1.29 (m, 0.51H), 1.26-1.17 (m, 2.95H), 1.10 (s, 1.85H);  $^{13}\text{C}$  NMR (101 MHz,  $\text{CDCl}_3$ )  $\delta$  171.66, 64.67 (m, labeled), 47.76 (m, labeled), 43.30 (m, labeled), 32.59 (m, labeled), 24.66 (m, labeled), 22.77, 22.38 (m, labeled).

Deuterium incorporation: 9.7 D/molecule ( $^1\text{H}$ -NMR), 10.2 D/molecule [HRMS (ESI)].

Dyq-1-20-3 #794 RT: 3.38 AV: 1 NL: 3.58E7  
T: FTMS + p ESI Full ms [100.00-300.00]

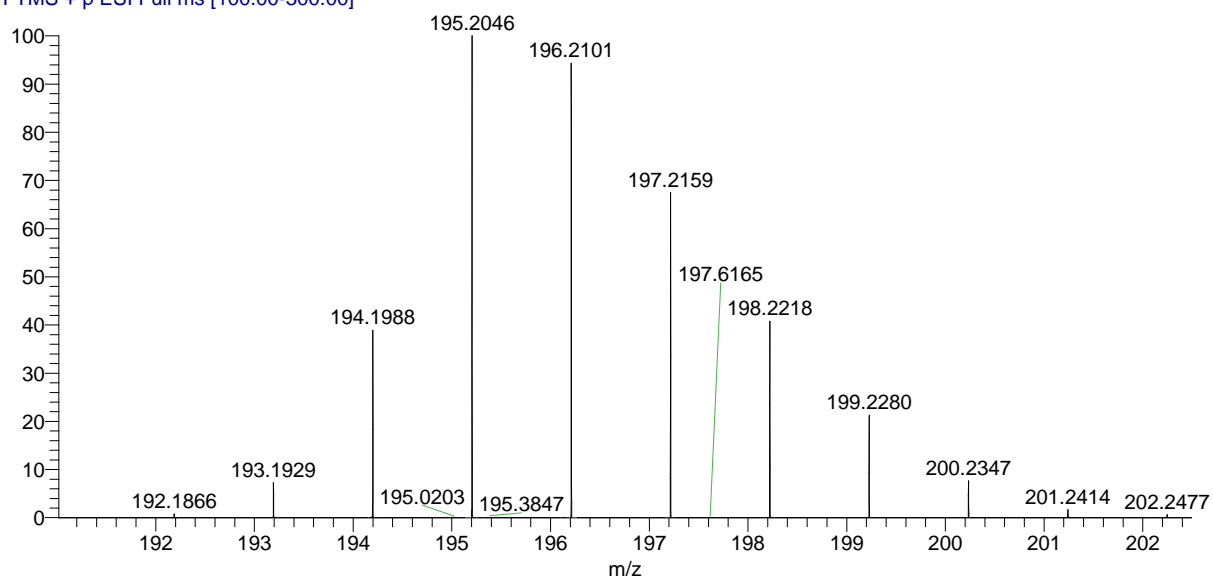

193.1932 ( $\text{C}_{10}\text{H}_{12}\text{D}_7\text{NO}_2 + \text{H}^+$ , 2%), 194.1992 ( $\text{C}_{10}\text{H}_{11}\text{D}_8\text{NO}_2 + \text{H}^+$ , 14%), 195.2050 ( $\text{C}_{10}\text{H}_{10}\text{D}_9\text{NO}_2 + \text{H}^+$ , 39%), 196.2105 ( $\text{C}_{10}\text{H}_9\text{D}_{10}\text{NO}_2 + \text{H}^+$ , 36%), 197.2163 ( $\text{C}_{10}\text{H}_8\text{D}_{11}\text{NO}_2 + \text{H}^+$ , 26%), 198.2222 ( $\text{C}_{10}\text{H}_7\text{D}_{12}\text{NO}_2 + \text{H}^+$ , 16%), 199.2283 ( $\text{C}_{10}\text{H}_6\text{D}_{13}\text{NO}_2 + \text{H}^+$ , 8%), 200.2350 ( $\text{C}_{10}\text{H}_5\text{D}_{14}\text{NO}_2 + \text{H}^+$ , 4%), 201.2416 ( $\text{C}_{10}\text{H}_4\text{D}_{15}\text{NO}_2 + \text{H}^+$ , 1%).

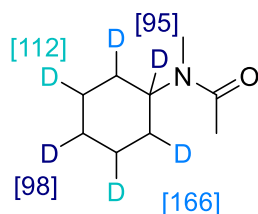

***N*-(cyclohexyl-1,2,3,4,5,6-*d*<sub>6</sub>)-*N*-methylacetamide (22b).** The title product was obtained with 70% yield (45.2 mg, 0.4 mmol scale) as white solid.  $^1\text{H}$  NMR (400 MHz,  $\text{CDCl}_3$ )  $\delta$  3.47-3.41 (m, 0.05H), 2.78 (d,  $J$  = 12.8 Hz, 3.00H), 2.06 (d,  $J$  = 15.6 Hz, 2.98H), 1.78 (s, 0.54H), 1.71 (s, 0.56H), 1.44 (s, 0.80H), 1.27 (s, 1.26H), 1.03-1.00 (m, 0.52H);  $^1\text{H}$  NMR (800 MHz,  $\text{CDCl}_3$ )  $\delta$  3.43 (s, 0.05H), 2.77 (d,  $J$  = 14.8 Hz, 3.00H), 2.05 (d,  $J$  = 16.8 Hz, 2.99H), 1.78 (s, 0.51H), 1.70 (s, 0.56H), 1.44 (s, 0.77H), 1.26 (s, 1.26H), 1.03 (s, 0.25H), 1.00 (s, 0.23H);  $^{13}\text{C}$  NMR (101 MHz,  $\text{CDCl}_3$ )  $\delta$  170.21, 170.11, 57.27 (m, labeled), 51.60 (m, labeled), 30.31 (m, labeled), 30.29, 29.48 (m, labeled), 27.01, 24.99 (m, labeled), 22.66, 21.76.

Deuterium incorporation: 7.3 D/molecule ( $^1\text{H}$ -NMR-400MHz), 7.4 D/molecule ( $^1\text{H}$ -NMR-800MHz), 7.3 D/molecule [HRMS (ESI)].

Dyq-1-20-4 #943-1374 RT: 4.02-5.83 AV: 432 NL: 6.22E6  
T: FTMS + p ESI Full ms [100.00-300.00]

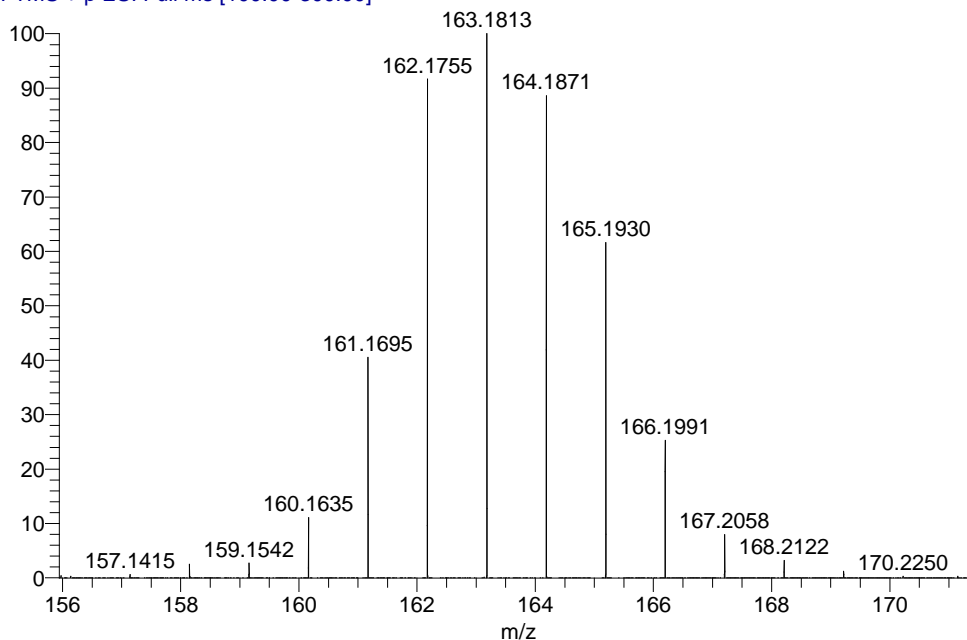

160.1635 ( $\text{C}_9\text{H}_{13}\text{D}_4\text{NO} + \text{H}^+$ , 2%), 161.1695 ( $\text{C}_9\text{H}_{12}\text{D}_5\text{NO} + \text{H}^+$ , 9%), 162.1755 ( $\text{C}_9\text{H}_{11}\text{D}_6\text{NO} + \text{H}^+$ , 21%), 163.1813 ( $\text{C}_9\text{H}_{10}\text{D}_7\text{NO} + \text{H}^+$ , 23%), 164.1871 ( $\text{C}_9\text{H}_9\text{D}_8\text{NO} + \text{H}^+$ , 21%), 165.1930 ( $\text{C}_9\text{H}_8\text{D}_9\text{NO} + \text{H}^+$ , 14%), 166.1991 ( $\text{C}_9\text{H}_7\text{D}_{10}\text{NO} + \text{H}^+$ , 6%), 167.2058 ( $\text{C}_9\text{H}_6\text{D}_{11}\text{NO} + \text{H}^+$ , 2%), 168.2122 ( $\text{C}_9\text{H}_5\text{D}_{12}\text{NO} + \text{H}^+$ , 1%).

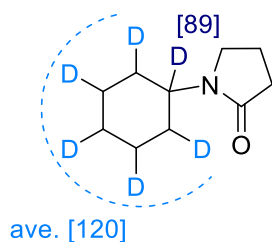

**1-(Cyclohexyl-1,2,3,4,5,6- $d_6$ )pyrrolidin-2-one (23b).** The title product was obtained with 89% yield (61.7 mg, 0.4 mmol scale) as white solid.  $^1\text{H}$  NMR (400 MHz,  $\text{CDCl}_3$ )  $\delta$  3.90-3.83 (m, 0.11H), 3.29 (t,  $J = 7.0$  Hz, 2.00H), 2.33 (t,  $J = 8.0$  Hz, 1.99H), 1.97-1.89 (m, 1.99H), 1.69 (s, 0.92H), 1.64-1.57 (m, 0.62H), 1.28 (s, 2.02H), 1.01 (s, 0.43H);  $^{13}\text{C}$  NMR (101 MHz,  $\text{CDCl}_3$ )  $\delta$  174.30, 50.07 (m, labeled), 42.90, 31.71, 29.75 (m, labeled), 24.87 (m, labeled), 18.23.

Deuterium incorporation: 6.9 D/molecule ( $^1\text{H}$ -NMR), 6.9 D/molecule [HRMS (ESI)].

DYQ-1-49-3 #571-761 RT: 4.26-5.65 AV: 191 NL: 1.70E7  
T: FTMS + p ESI Full ms [100.00-500.00]

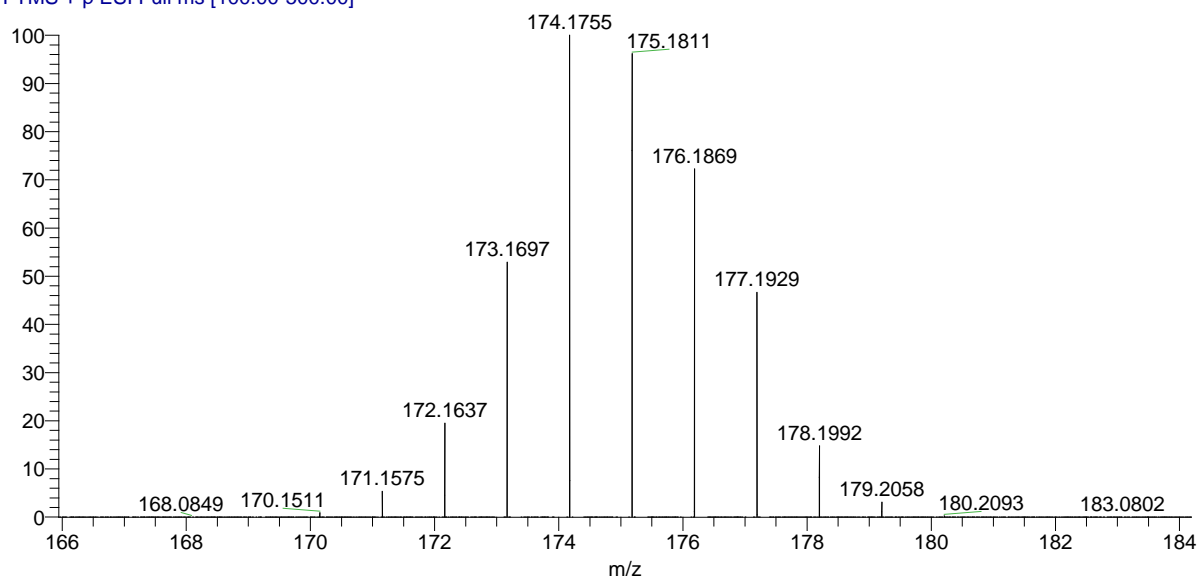

171.1575 ( $\text{C}_{10}\text{H}_{14}\text{D}_3\text{NO} + \text{H}^+$ , 1%), 172.1637 ( $\text{C}_{10}\text{H}_{13}\text{D}_4\text{NO} + \text{H}^+$ , 4%), 173.1697 ( $\text{C}_{10}\text{H}_{12}\text{D}_5\text{NO} + \text{H}^+$ , 12%), 174.1755 ( $\text{C}_{10}\text{H}_{11}\text{D}_6\text{NO} + \text{H}^+$ , 25%), 175.1811 ( $\text{C}_{10}\text{H}_{10}\text{D}_7\text{NO} + \text{H}^+$ , 24%), 176.1869 ( $\text{C}_{10}\text{H}_9\text{D}_8\text{NO} + \text{H}^+$ , 18%), 177.1929 ( $\text{C}_{10}\text{H}_8\text{D}_9\text{NO} + \text{H}^+$ , 4%), 178.1992 ( $\text{C}_{10}\text{H}_7\text{D}_{10}\text{NO} + \text{H}^+$ , 1%).

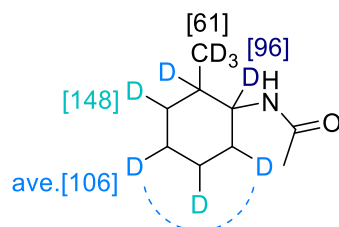

***N*-(2-(methyl- $d_3$ )cyclohexyl-1,2,3,4,5,6- $d_6$ )acetamide (24b).** The title product was obtained with 85% yield (67.6 mg, 0.4 mmol scale) as white solid.  $^1\text{H}$  NMR (400 MHz,  $\text{CDCl}_3$ )  $\delta$  5.66 (d,  $J$  = 36.8 Hz, 0.59H), 1.95 (d,  $J$  = 10.0 Hz, 3.00H), 1.70-1.55 (m, 0.78H), 1.49-1.45 (m, 0.52H), 1.42-1.35 (m, 0.65H), 1.15 (s, 0.52H), 1.00 (s, 0.39H), 0.94-0.79 (m, 1.17H);  $^{13}\text{C}$  NMR (101 MHz,  $\text{CDCl}_3$ )  $\delta$  169.66, 169.61, 169.57, 169.52, 53.43 (m, labeled), 49.28 (m, labeled), 33.21 (m, labeled), 29.36 (m, labeled), 25.05 (m, labeled), 23.67, 23.62, 23.59, 23.54, 22.84 (m, labeled), 21.88 (m, labeled), 15.64 (m, labeled).

Deuterium incorporation: 8.9 D/molecule ( $^1\text{H}$ -NMR), 8.9 D/molecule [HRMS (ESI)].

DYQ-1-22-1 #605 RT: 4.51 AV: 1 NL: 1.44E7  
T: FTMS + p ESI Full ms [100.00-350.00]

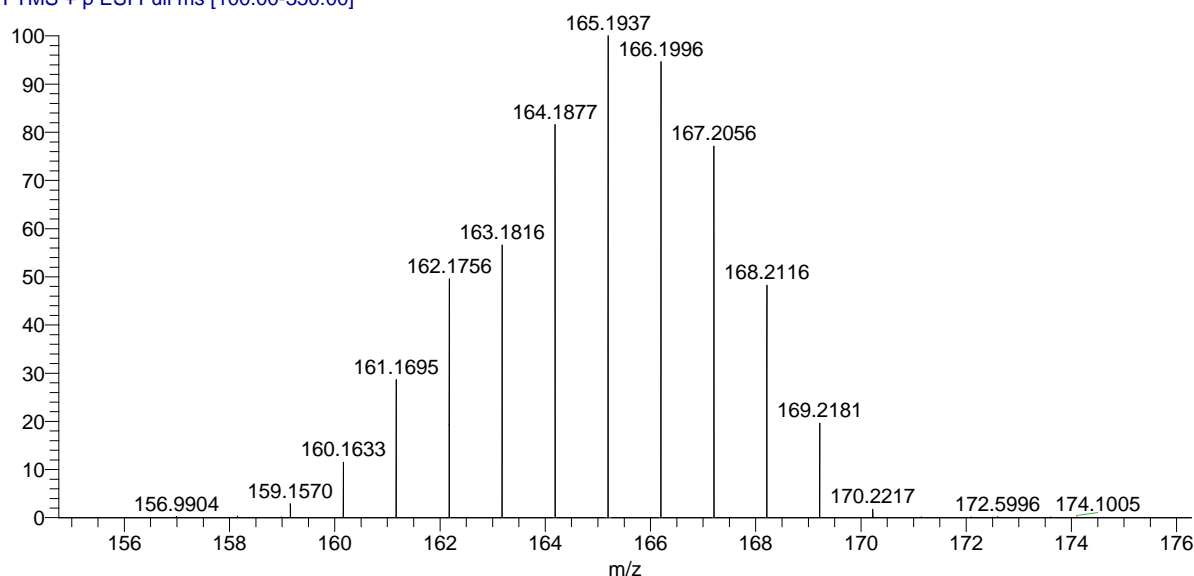

160.1633 ( $\text{C}_9\text{H}_{13}\text{D}_4\text{NO} + \text{H}^+$ , 2%), 161.1695 ( $\text{C}_9\text{H}_{12}\text{D}_5\text{NO} + \text{H}^+$ , 5%), 162.1756 ( $\text{C}_9\text{H}_{11}\text{D}_6\text{NO} + \text{H}^+$ , 8%), 163.1816 ( $\text{C}_9\text{H}_{10}\text{D}_7\text{NO} + \text{H}^+$ , 11%), 164.1877 ( $\text{C}_9\text{H}_9\text{D}_8\text{NO} + \text{H}^+$ , 13%), 165.1937 ( $\text{C}_9\text{H}_8\text{D}_9\text{NO} + \text{H}^+$ , 18%), 166.1996 ( $\text{C}_9\text{H}_7\text{D}_{10}\text{NO} + \text{H}^+$ , 17%), 167.2056 ( $\text{C}_9\text{H}_6\text{D}_{11}\text{NO} + \text{H}^+$ , 13%), 168.2116 ( $\text{C}_9\text{H}_5\text{D}_{12}\text{NO} + \text{H}^+$ , 9%), 169.2181 ( $\text{C}_9\text{H}_4\text{D}_{13}\text{NO} + \text{H}^+$ , 3%).

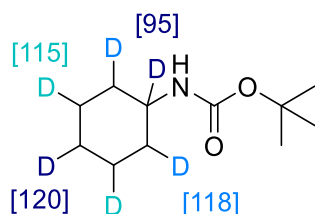

**tert-Butyl (cyclohexyl-1,2,3,4,5,6-*d*<sub>6</sub>)carbamate (25b).** The title product was obtained with 90% yield (75.0 mg, 0.4 mmol scale) as white solid.  $^1\text{H}$  NMR (400 MHz,  $\text{CDCl}_3$ )  $\delta$  4.43 (s, 0.98H), 3.39 (s, 0.05H), 1.91-1.84 (m, 0.34H), 1.64 (s, 1.09H), 1.53 (s, 0.25H), 1.43 (s, 9.00H), 1.27 (s, 0.61H), 1.09 (s, 0.55H), 1.05 (s, 1.30H);  $^{13}\text{C}$  NMR (101 MHz,  $\text{CDCl}_3$ )  $\delta$  155.39, 79.10, 49.03 (m, labeled), 33.08 (m, labeled), 29.87, 28.61, 24.76 (m, labeled).

Deuterium incorporation: 6.8 D/molecule ( $^1\text{H}$ -NMR), 7.1 D/molecule [HRMS (ESI)].

Dyq-1-49-2 #812 RT: 6.06 AV: 1 NL: 4.49E7  
T: FTMS + p ESI Full ms [100.00-1000.00]

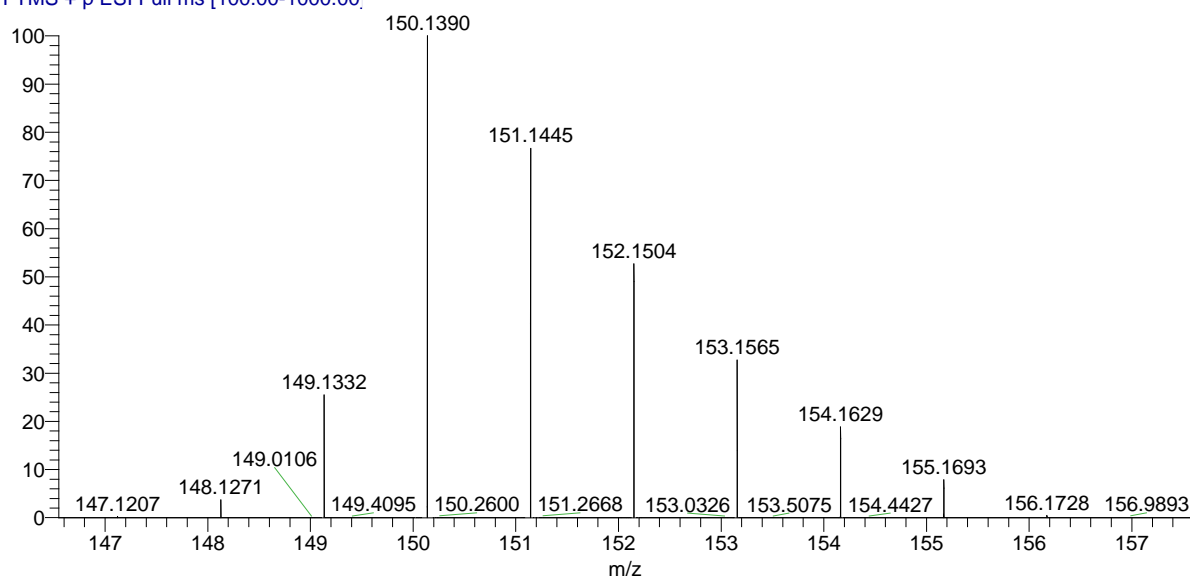

148.1271 ( $C_{11}H_{17}D_4NO_2 + H^+$ , 1%), 149.1332 ( $C_{11}H_{16}D_5NO_2 + H^+$ , 8%), 150.1390 ( $C_{11}H_{15}D_6NO_2 + H^+$ , 32%), 151.1445 ( $C_{11}H_{14}D_7NO_2 + H^+$ , 24%), 152.1504 ( $C_{11}H_{13}D_8NO_2 + H^+$ , 17%), 153.1565 ( $C_{11}H_{12}D_9NO_2 + H^+$ , 10%), 154.1629 ( $C_{11}H_{11}D_{10}NO_2 + H^+$ , 6%), 155.1693 ( $C_{11}H_{10}D_{11}NO_2 + H^+$ , 2%).

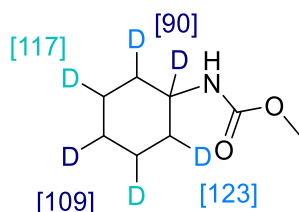

**Methyl (cyclohexyl-1,2,3,4,5,6- $d_6$ )carbamate (26b).** The title product was obtained with 90% yield (55.6 mg, 0.4 mmol scale) as white solid.  $^1H$  NMR (400 MHz,  $CDCl_3$ )  $\delta$  4.59 (s, 1.00H), 3.64 (s, 3.00H), 3.45 (s, 0.11H), 1.92-1.87 (m, 0.30H), 1.69-1.64 (m, 1.04H), 1.60-1.54 (0.29H), 1.34-1.25 (m, 0.56H), 1.11-1.08 (m, 1.84H);  $^1H$  NMR (800 MHz,  $CDCl_3$ )  $\delta$  4.58-4.43 (m, 1.00H), 3.64 (s, 3.02H), 3.46 (s, 0.10H), 1.88 (s, 0.32H), 1.66 (s, 1.10H), 1.55 (s, 0.29H), 1.30 (s, 0.56H), 1.12 (s, 0.62H), 1.09 (s, 1.22H);  $^{13}C$  NMR (201 MHz,  $CDCl_3$ )  $\delta$  156.41, 52.38 (m, labeled), 51.96, 49.82 (m, labeled), 49.39 (m, labeled), 32.96 (m, labeled), 24.93 (m, labeled), 24.33 (m, labeled).

Deuterium incorporation: 6.9 D/molecule ( $^1H$ -NMR), 6.9 D/molecule [HRMS (ESI)]

dyq-1-49-1 #592-805 RT: 4.42-6.01 AV: 214 NL: 2.04E6  
T: FTMS + p ESI Full ms [100.00-500.00]

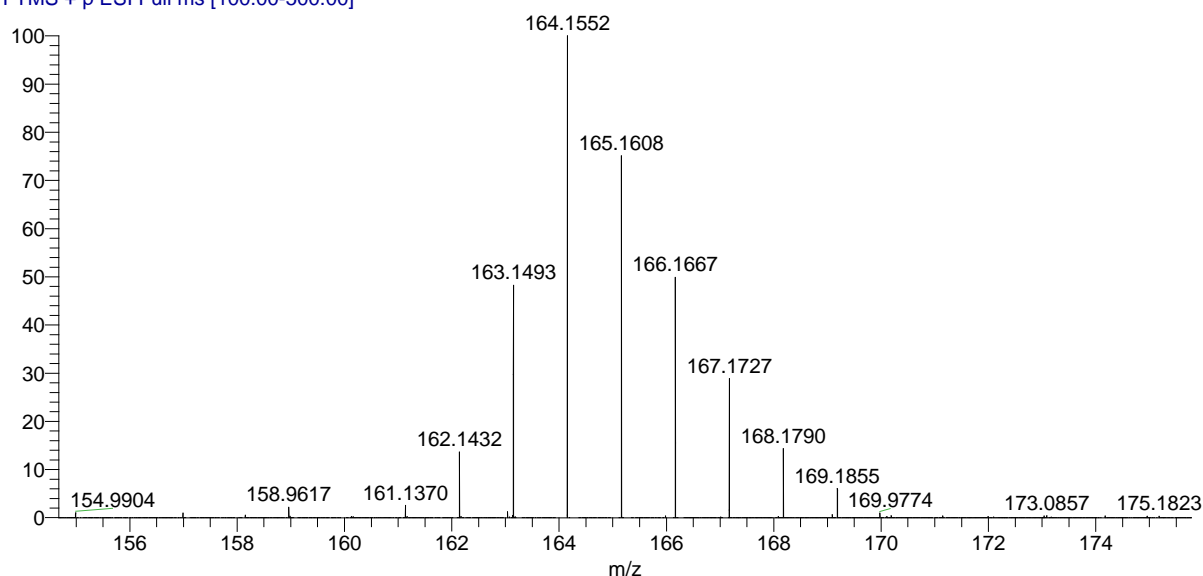

161.1370 ( $\text{C}_8\text{H}_{12}\text{D}_3\text{NO}_2 + \text{H}^+$ , 1%), 162.1432 ( $\text{C}_8\text{H}_{11}\text{D}_4\text{NO}_2 + \text{H}^+$ , 4%), 163.1493 ( $\text{C}_8\text{H}_{10}\text{D}_5\text{NO}_2 + \text{H}^+$ , 13%), 164.1552 ( $\text{C}_8\text{H}_9\text{D}_6\text{NO}_2 + \text{H}^+$ , 28%), 165.1608 ( $\text{C}_8\text{H}_8\text{D}_7\text{NO}_2 + \text{H}^+$ , 23%), 166.1667 ( $\text{C}_8\text{H}_7\text{D}_8\text{NO}_2 + \text{H}^+$ , 16%), 167.1727 ( $\text{C}_8\text{H}_6\text{D}_9\text{NO}_2 + \text{H}^+$ , 9%), 168.1790 ( $\text{C}_8\text{H}_5\text{D}_{10}\text{NO}_2 + \text{H}^+$ , 5%), 169.1855 ( $\text{C}_8\text{H}_4\text{D}_{11}\text{NO}_2 + \text{H}^+$ , 2%).

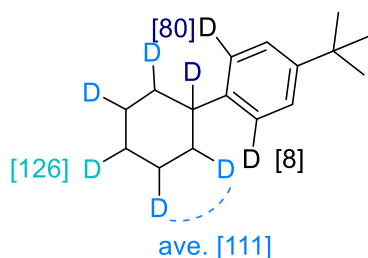

**1-(*tert*-Butyl)-4-(cyclohexyl-1,2,3,4,5,6-*d*<sub>6</sub>)benzene (27b).** The title product was obtained with 62% yield (34.1 mg, 0.2 mmol scale) as colorless liquid.  $^1\text{H}$  NMR (400 MHz,  $\text{CDCl}_3$ )  $\delta$  7.35 (d,  $J = 8.4$  Hz, 1.94H), 7.18 (d,  $J = 8.4$  Hz, 1.84H), 2.50 (t,  $J = 12.0$  Hz, 0.20H), 1.91-1.83 (m, 1.27H), 1.77-1.74 (m, 0.25H), 1.41 (s, 2.28H), 1.35 (s, 9.00H), 1.25 (s, 0.49H);  $^{13}\text{C}$  NMR (101 MHz,  $\text{CDCl}_3$ )  $\delta$  148.59, 145.23, 126.60, 125.32, 44.00 (m, labeled), 34.53, 33.68 (m, labeled), 31.65, 26.56 (m, labeled).

Deuterium incorporation: 6.7 D/molecule ( $^1\text{H}$ -NMR).

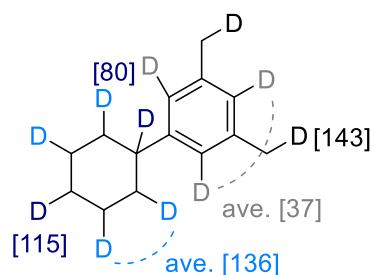

**1-(Cyclohexyl-1,2,3,4,5,6-*d*<sub>6</sub>)-3,5-bis(methyl-*d*)benzene (28b).** The title product was obtained with 30% yield (24.0 mg, 0.2 mmol scale) as colorless liquid. <sup>1</sup>H NMR (400 MHz, CDCl<sub>3</sub>) δ 6.85 (s, 1.89H), 2.48-2.40 (m, 0.20H), 2.32 (s, 3.15H), 1.87-1.81 (m, 1.89H), 1.76-1.69 (m, 0.31H), 1.39 (s, 1.66H), 1.23 (s, 0.54H); <sup>13</sup>C NMR (101 MHz, CDCl<sub>3</sub>) δ 148.35, 137.87, 127.65, 124.87, 44.52 (m, labeled), 34.18 (m, labeled), 26.43 (m, labeled), 21.57.

Deuterium incorporation: 11.4 D/molecule (<sup>1</sup>H-NMR).

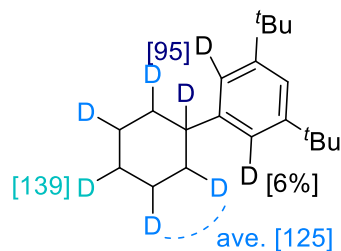

**1,3-Di-*tert*-butyl-5-(cyclohexyl-1,2,3,4,5,6-*d*<sub>6</sub>)benzene (29b).** The title product was obtained with 86% yield (40.0 mg, 0.2 mmol scale) as colorless liquid. <sup>1</sup>H NMR (400 MHz, CDCl<sub>3</sub>) δ 7.30 (t, *J* = 2.0 Hz, 0.98H), 7.10 (d, *J* = 2.0 Hz, 1.88H), 2.52 (t, *J* = 12.0 Hz, 0.05H), 1.94-1.83 (m, 1.15H), 1.74 (s, 0.13H), 1.44 (s, 1.85H), 1.37 (s, 18.00H), 1.27 (s, 0.48H); <sup>13</sup>C NMR (101 MHz, CDCl<sub>3</sub>) δ 150.54, 147.34, 121.25, 120.08, 44.67 (m, labeled), 35.09, 34.21 (m, labeled), 31.80, 26.58 (m, labeled).

Deuterium incorporation: 7.5 D/molecule (<sup>1</sup>H-NMR).



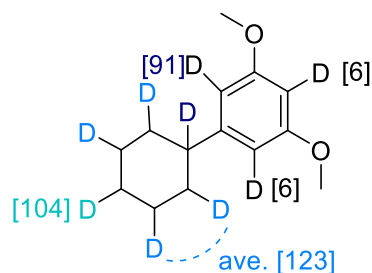

**1-(Cyclohexyl-1,2,3,4,5,6-*d*<sub>6</sub>)-3,5-dimethoxybenzene (30b).** The title product was obtained with 78% yield (70.8 mg, 0.4 mmol scale) as colorless liquid. <sup>1</sup>H NMR (400 MHz, CDCl<sub>3</sub>) δ 6.41 (d, *J* = 2.0 Hz, 1.88H), 6.32 (m, 0.94H), 3.80 (s, 6.00H), 2.45 (t, *J* = 12.0, 0.09H), 1.89-1.81 (m, 1.00H), 1.71-1.65 (m, 0.49H), 1.38 (s, 2.10H), 1.23 (s, 0.47H); <sup>13</sup>C NMR (101 MHz, CDCl<sub>3</sub>) δ 160.87, 150.88, 105.18, 97.75, 55.38, 44.62 (m, labeled), 33.84 (m, labeled), 29.44 (m, labeled), 26.36 (m, labeled), 25.61 (m, labeled).

Deuterium incorporation: 7.1 D/molecule (<sup>1</sup>H-NMR), 7.4 D/molecule (HRMS (ESI)).

Dyq-1-122-3\_221031182156 #1579 RT: 6.73 AV: 1 NL: 1.10E7  
T: FTMS + p ESI Full ms [100.00-500.00]

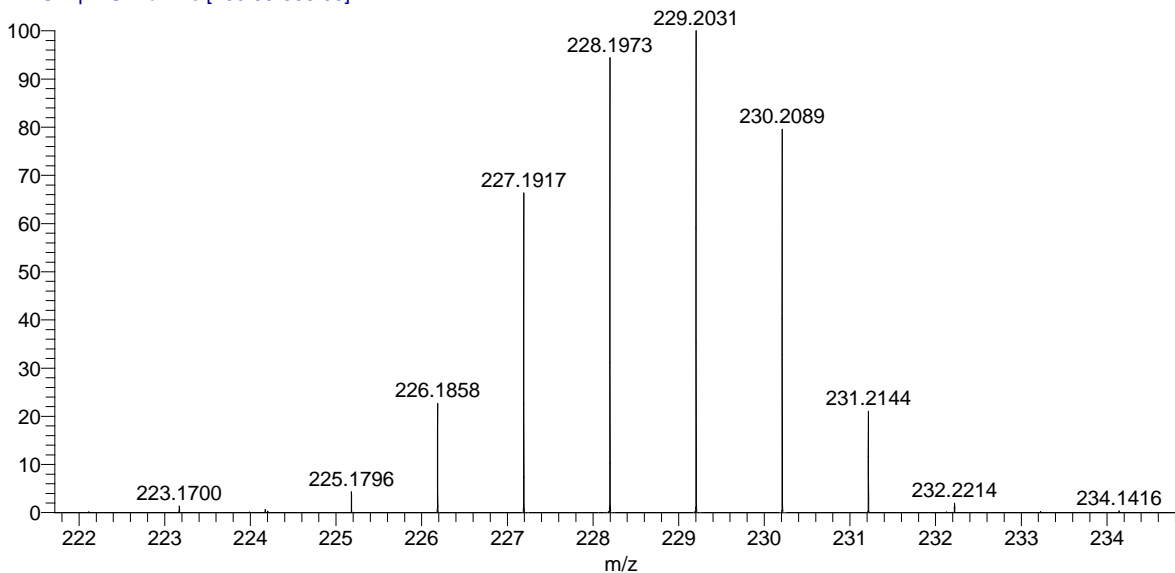

225.1796 (C<sub>14</sub>H<sub>16</sub>D<sub>4</sub>O<sub>2</sub> + H<sup>+</sup>, 1%), 226.1858 (C<sub>14</sub>H<sub>15</sub>D<sub>5</sub>O<sub>2</sub> + H<sup>+</sup>, 4%), 227.1917 (C<sub>14</sub>H<sub>14</sub>D<sub>6</sub>O<sub>2</sub> + H<sup>+</sup>, 13%), 228.1973 (C<sub>14</sub>H<sub>13</sub>D<sub>7</sub>O<sub>2</sub> + H<sup>+</sup>, 43%), 229.2031 (C<sub>14</sub>H<sub>12</sub>D<sub>8</sub>O<sub>2</sub> + H<sup>+</sup>, 20%), 230.2089 (C<sub>14</sub>H<sub>11</sub>D<sub>9</sub>O<sub>2</sub> + H<sup>+</sup>, 15%), 231.2144 (C<sub>14</sub>H<sub>10</sub>D<sub>10</sub>O<sub>2</sub> + H<sup>+</sup>, 4%).

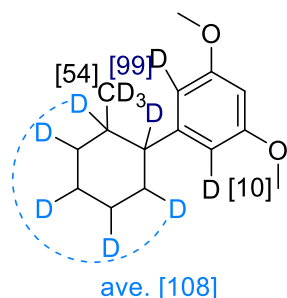

**1,3-Dimethoxy-5-(2-(methyl- $d_2$ )cyclohexyl-1,3,4,5,6- $d_5$ )benzene (31b).** The title product was obtained with 76% yield (73.6 mg, 0.4 mmol scale) as colorless liquid.  $^1\text{H}$  NMR (400 MHz,  $\text{CDCl}_3$ )  $\delta$  6.36-6.34 (m, 1.80H), 6.32-6.31 (m, 0.98H), 3.80 (s, 6.00H), 1.82 (s, 0.61H), 1.75 (s, 0.88H), 1.66-1.59 (m, 1.38H), 1.46 (s, 0.74H), 0.72-0.67 (m, 1.37H);  $^{13}\text{C}$  NMR (101 MHz,  $\text{CDCl}_3$ )  $\delta$  160.62, 149.18, 106.03, 97.42, 55.41, 33.13 (m, labeled), 26.29 (m, labeled), 24.26 (m, labeled), 19.90 (m, labeled), 12.51.

Deuterium incorporation: 8.2 D/molecule ( $^1\text{H}$ -NMR) , 8.0 D/molecule (HRMS (ESI)).

DYQ-1-25-4 #974 RT: 7.28 AV: 1 NL: 2.46E6  
T: FTMS + p ESI Full ms [100.00-1000.00]

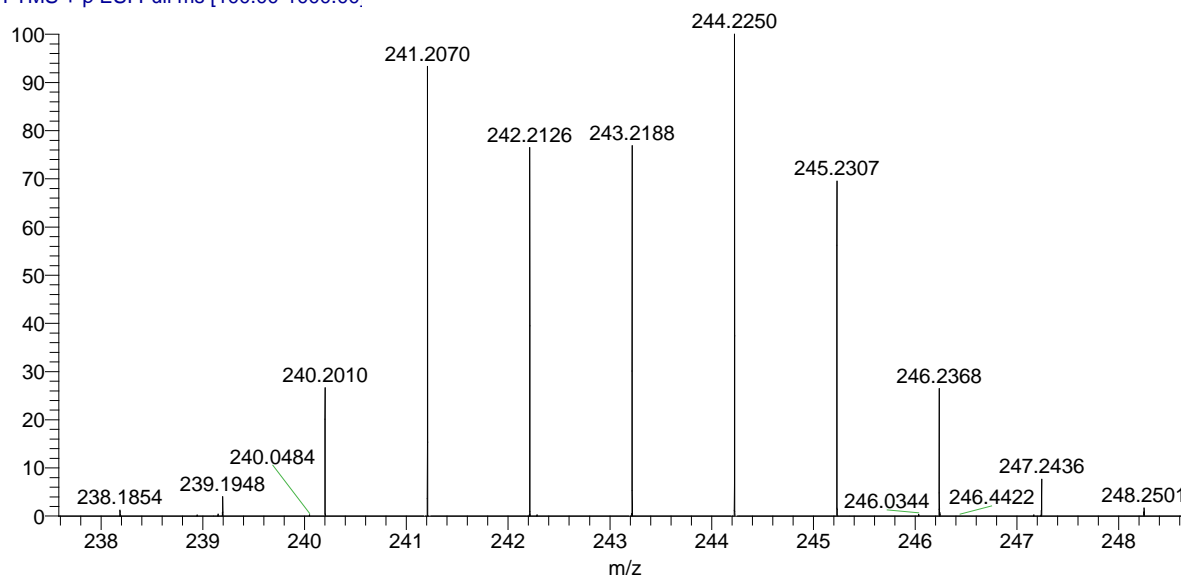

239.1948 ( $\text{C}_{15}\text{H}_{18}\text{D}_4\text{O}_2 + \text{H}^+$ , 1%), 240.2010 ( $\text{C}_{15}\text{H}_{17}\text{D}_5\text{O}_2 + \text{H}^+$ , 6%), 241.2070 ( $\text{C}_{15}\text{H}_{16}\text{D}_6\text{O}_2 + \text{H}^+$ , 20%), 242.2126 ( $\text{C}_{15}\text{H}_{15}\text{D}_7\text{O}_2 + \text{H}^+$ , 15%), 243.2188 ( $\text{C}_{15}\text{H}_{14}\text{D}_8\text{O}_2 + \text{H}^+$ , 15%), 244.2250 ( $\text{C}_{15}\text{H}_{13}\text{D}_9\text{O}_2 + \text{H}^+$ , 21%), 245.2307 ( $\text{C}_{15}\text{H}_{12}\text{D}_{10}\text{O}_2 + \text{H}^+$ , 14%), 246.2368 ( $\text{C}_{15}\text{H}_{11}\text{D}_{11}\text{O}_2 + \text{H}^+$ , 6%), 247.2436 ( $\text{C}_{15}\text{H}_{10}\text{D}_{12}\text{O}_2 + \text{H}^+$ , 1%).

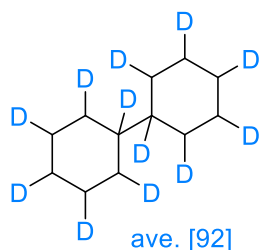

**1,1'-Bi(cyclohexane)-1,1',2,2',3,3',4,4',5,5',6,6'-*d*<sub>12</sub> (32b).** The title product was obtained with 68% yield (48.9 mg, 0.4 mmol scale) as colorless liquid. <sup>1</sup>H NMR (400 MHz, CDCl<sub>3</sub>) δ 1.71-1.58 (m, 3.82H), 1.15-0.90 (m, 7.11H); <sup>13</sup>C NMR (101 MHz, CDCl<sub>3</sub>) δ 29.75 (m, labeled), 26.42 (m, labeled).

Deuterium incorporation: 11.1 D/molecule (<sup>1</sup>H-NMR).

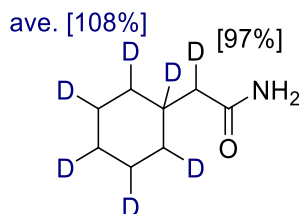

**2-(Cyclohexyl-1,2,3,4,5,6-*d*<sub>6</sub>)acetamide-2-*d* (33b).** The title product was obtained with 83% yield (48.7 mg, 0.4 mmol scale) as colorless liquid. <sup>1</sup>H NMR (400 MHz, CDCl<sub>3</sub>) δ 5.43 (d, *J* = 25.6 Hz, 2.00H), 2.10-2.07 (m, 1.03H), 1.78-1.62 (m, 1.68H), 1.38-1.22 (m, 0.95H), 1.11 (s, 0.57), 0.93 (s, 1.34); <sup>13</sup>C NMR (101 MHz, CDCl<sub>3</sub>) δ 175.18, 44.10, 32.64 (m, labeled), 29.91 (m, labeled), 25.57 (m, labeled).

Deuterium incorporation: 7.4 D/molecule (<sup>1</sup>H-NMR), 7.2 D/molecule [HRMS (ESI)]

DYQ-1-55-4 #579 RT: 4.32 AV: 1 NL: 7.40E6  
T: FTMS + p ESI Full ms [100.00-500.00]

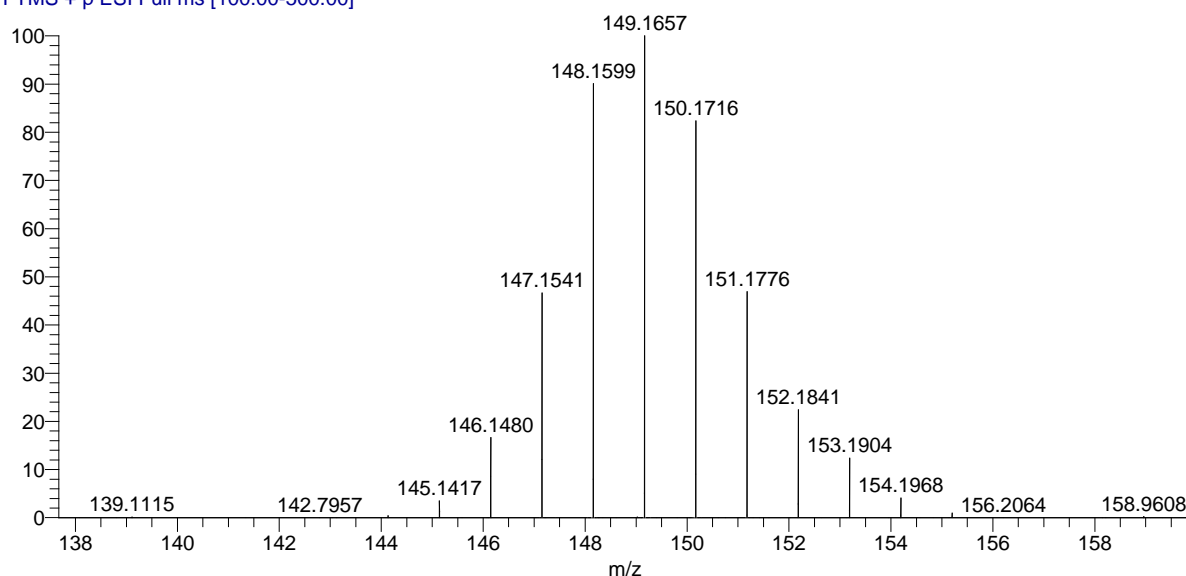

145.1417 ( $\text{C}_8\text{H}_{12}\text{D}_3\text{NO} + \text{H}^+$ , 1%), 146.1480 ( $\text{C}_8\text{H}_{11}\text{D}_4\text{NO} + \text{H}^+$ , 4%), 147.1541 ( $\text{C}_8\text{H}_{10}\text{D}_5\text{NO} + \text{H}^+$ , 12%), 148.1599 ( $\text{C}_8\text{H}_9\text{D}_6\text{NO} + \text{H}^+$ , 21%), 149.1657 ( $\text{C}_8\text{H}_8\text{D}_7\text{NO} + \text{H}^+$ , 23%), 150.1716 ( $\text{C}_8\text{H}_7\text{D}_8\text{NO} + \text{H}^+$ , 19%), 151.1776 ( $\text{C}_8\text{H}_6\text{D}_9\text{NO} + \text{H}^+$ , 11%), 152.1841 ( $\text{C}_8\text{H}_5\text{D}_{10}\text{NO} + \text{H}^+$ , 6%), 153.1904 ( $\text{C}_8\text{H}_4\text{D}_{11}\text{NO} + \text{H}^+$ , 3%), 154.1968 ( $\text{C}_8\text{H}_3\text{D}_{12}\text{NO} + \text{H}^+$ , 1%).

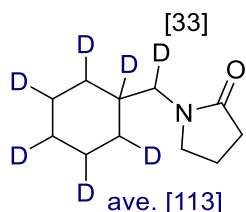

**1-((Cyclohexyl-1,2,3,4,5,6-*d*<sub>6</sub>)methyl-*d*)pyrrolidin-2-one (34b).** The title product was obtained with 89% yield (66.5 mg, 0.4 mmol scale) as white solid.  $^1\text{H}$  NMR (400 MHz,  $\text{CDCl}_3$ )  $\delta$  3.29 (t,  $J$  = 7.2 Hz, 2.00H), 3.03-2.99 (m, 1.67H), 2.30 (t,  $J$  = 8.0 Hz, 2.00H), 1.97-1.89 (m, 2.01H), 1.63-1.52 (m, 1.78H), 1.12-1.04 (m, 0.88H), 0.83 (s, 1.55H);  $^{13}\text{C}$  NMR (201 MHz,  $\text{CDCl}_3$ )  $\delta$  175.27, 49.03, 48.94, 48.62 (m, labeled), 48.06, 48.03, 47.99, 35.31 (m, labeled), 31.20, 30.20 (m, labeled), 25.79 (m, labeled), 25.22 (m, labeled), 18.19.

Deuterium incorporation: 7.1D/molecule ( $^1\text{H}$ -NMR), 7.1 D/molecule [HRMS (ESI)]

DYQ-1-49-4 #655-831 RT: 4.89-6.16 AV: 177 NL: 3.25E7  
T: FTMS + p ESI Full ms [100.00-500.00]

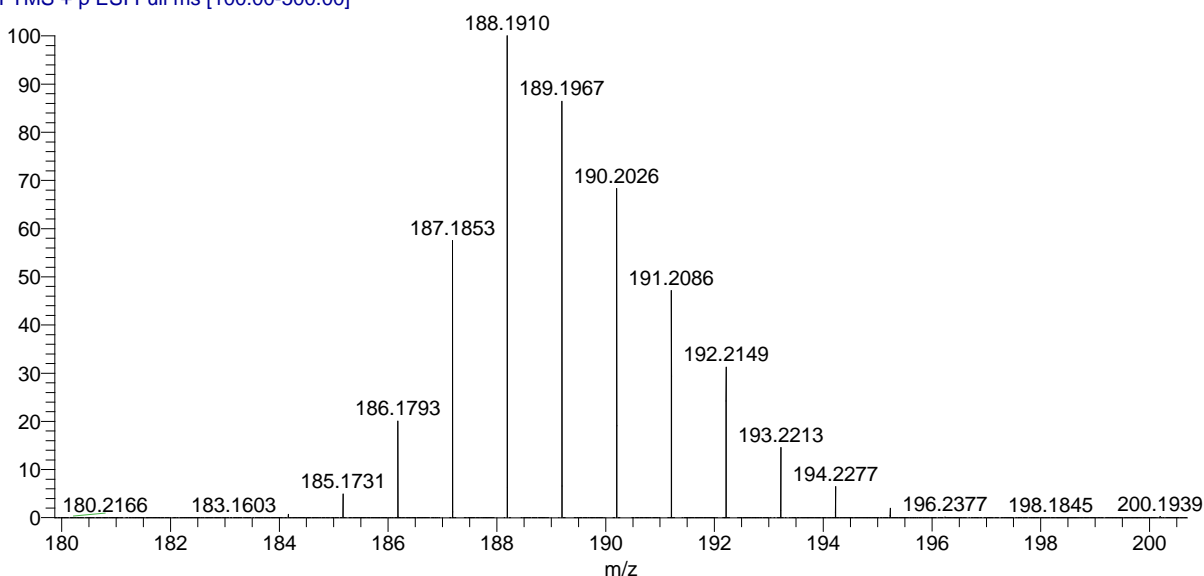

185.1731 ( $C_{11}H_{16}D_3NO + H^+$ , 1%), 186.1793, ( $C_{11}H_{15}D_4NO + H^+$ , 4%), 187.1853 ( $C_{11}H_{14}D_5NO + H^+$ , 12%), 188.1910 ( $C_{11}H_{13}D_6NO + H^+$ , 22%), 189.1967 ( $C_{11}H_{12}D_7NO + H^+$ , 21%), 190.2026 ( $C_{11}H_{11}D_8NO + H^+$ , 17%), 191.2086 ( $C_{11}H_{10}D_9NO + H^+$ , 11%), 192.2149 ( $C_{11}H_9D_{10}NO + H^+$ , 7%), 193.2213 ( $C_{11}H_8D_{11}NO + H^+$ , 2%), 194.2277 ( $C_{11}H_7D_{12}NO + H^+$ , 1%).

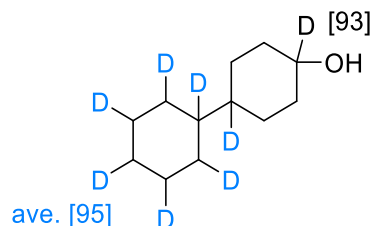

**[1,1'-Bi(cyclohexan)]-1,1',2',3',4,4',5',6'-d<sub>8</sub>-4-ol (35b)**. The title product was obtained with 99% yield (77.2 mg, 0.4 mmol scale) as white solid.  $^1H$  NMR (400 MHz,  $CDCl_3$ )  $\delta$  3.56-3.48 (m, 0.07H), 1.97 (d,  $J = 15.6$  Hz, 1.00H), 1.74-1.68 (m, 3.01H), 1.60 (s, 0.38H), 1.55-0.91 (m, 9.07H);  $^{13}C$  NMR (101 MHz,  $CDCl_3$ )  $\delta$  71.01 (m, labeled), 42.43, 41.70 (m, labeled), 36.01, 35.73 (m, labeled), 32.85, 32.65 (m, labeled), 29.84 (m, labeled), 28.22, 28.11, 28.01, 26.27 (m, labeled), 23.96, 23.86, 23.77.

Deuterium incorporation: 7.5 D/molecule ( $^1H$ -NMR).

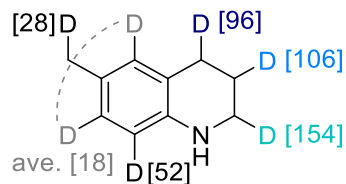

**6-Methyl-1,2,3,4-tetrahydroquinoline-2,2,3,4,8-*d*<sub>5</sub> (36b)**. The title product was obtained with 82% yield (49.1 mg, 0.4 mmol scale) as white solid. <sup>1</sup>H NMR (400 MHz, CDCl<sub>3</sub>) δ 6.84-6.83 (m, 1.64H), 6.47-6.45 (m, 0.48H), 3.69 (s, 1.00H), 3.31-3.28 (m, 0.46H), 2.80-2.75 (m, 1.04H), 2.26 (s, 2.72H), 1.98-1.93 (m, 0.94H); <sup>13</sup>C NMR (101 MHz, CDCl<sub>3</sub>) δ 142.64, 130.28, 127.44, 126.44, 121.77, 114.65, 42.27 (m, labeled), 27.03 (m, labeled), 21.83 (m, labeled), 20.60.

Deuterium incorporation: 4.7 D/molecule (<sup>1</sup>H-NMR), 4.7 D/molecule [HRMS (ESI)].

DYQ-1-22-4 #722 RT: 5.39 AV: 1 NL: 2.04E7  
T: FTMS + p ESI Full ms [100.00-350.00]

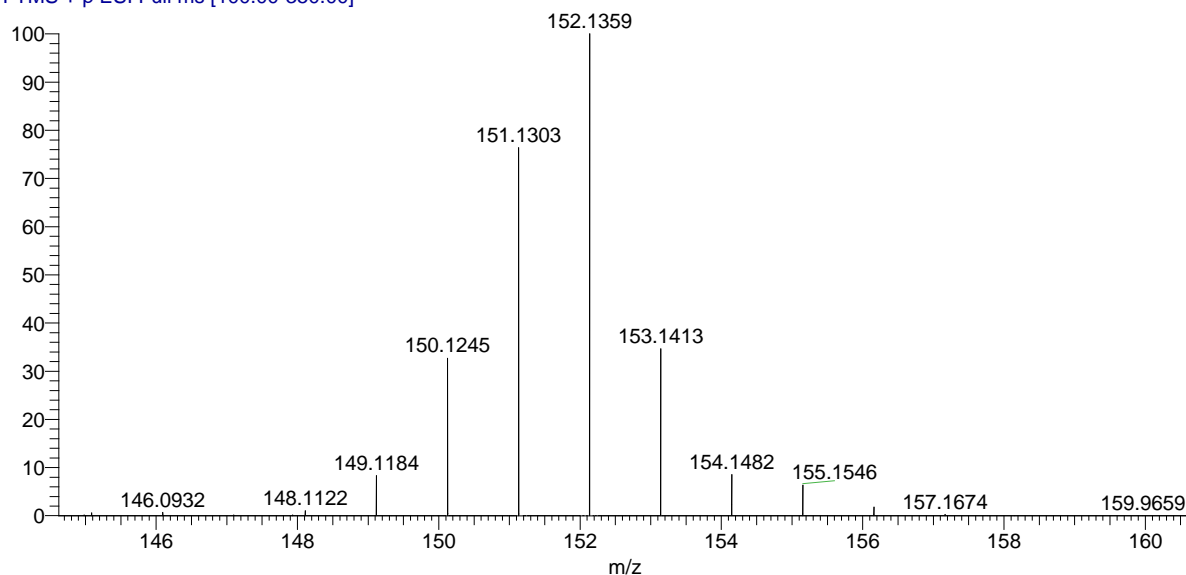

149.1184 (C<sub>10</sub>H<sub>12</sub>DN + H<sup>+</sup>, 3%), 150.1245 (C<sub>10</sub>H<sub>11</sub>D<sub>2</sub>N + H<sup>+</sup>, 12%), 151.1303 (C<sub>10</sub>H<sub>10</sub>D<sub>3</sub>N + H<sup>+</sup>, 29%), 152.1359 (C<sub>10</sub>H<sub>9</sub>D<sub>4</sub>N + H<sup>+</sup>, 40%), 153.1413 (C<sub>10</sub>H<sub>8</sub>D<sub>5</sub>N + H<sup>+</sup>, 14%).

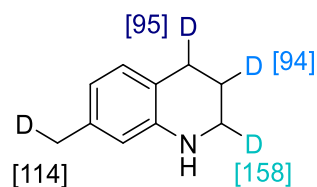

**7-Methyl-1,2,3,4-tetrahydroquinoline-2,3,4-*d*<sub>3</sub> (37b).** The title product was obtained with 81% yield (48.6 mg, 0.4 mmol scale) as white solid. <sup>1</sup>H NMR (400 MHz, CDCl<sub>3</sub>) δ 6.85 (d, *J* = 7.6 Hz, 1.00H), 6.45 (dd, *J* = 1.6, 7.6 Hz, 1.00H), 6.33 (s, 1.00H), 3.29-3.26 (m, 0.42H), 2.74-2.71 (m, 1.05H), 2.23 (s, 2.86H), 1.94-1.89 (m, 1.06H); <sup>13</sup>C NMR (101 MHz, CDCl<sub>3</sub>) δ 144.81, 136.57, 129.59, 118.72, 118.11, 114.97, 41.78 (m, labeled), 29.91, 26.36 (m, labeled), 22.01 (m, labeled), 21.32.

Deuterium incorporation: 4.6 D/molecule (<sup>1</sup>H-NMR), 4.7 D/molecule [HRMS (ESI)]

BFX-8-42-1 #753 RT: 5.62 AV: 1 NL: 2.24E7  
T: FTMS + p ESI Full ms [100.00-350.00]

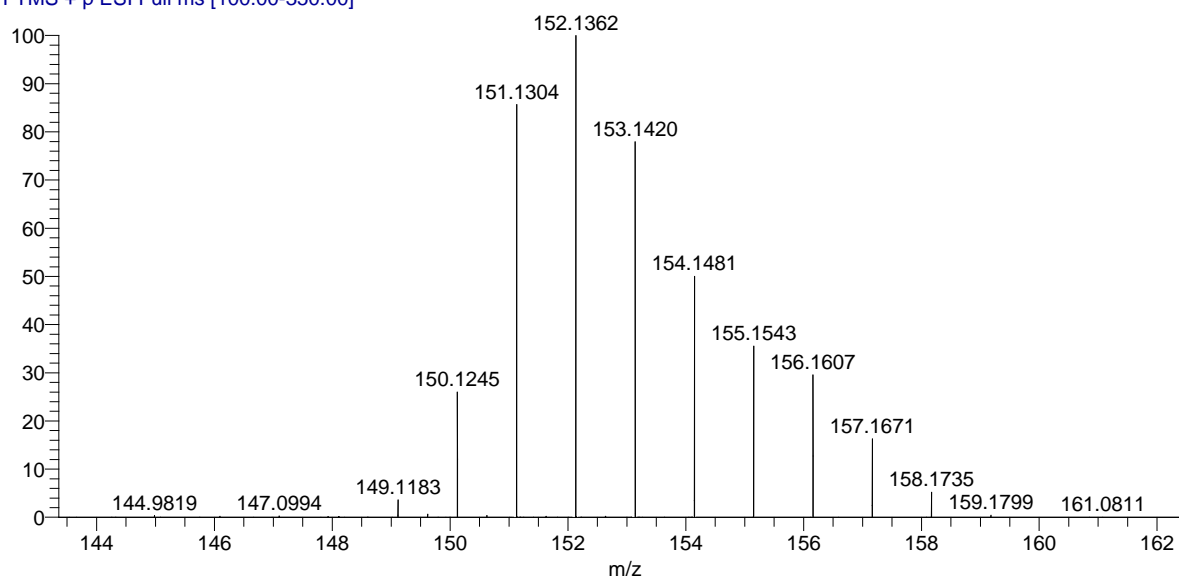

149.1183 (C<sub>10</sub>H<sub>12</sub>D<sub>1</sub>N + H<sup>+</sup>, 1%), 150.1245 (C<sub>10</sub>H<sub>11</sub>D<sub>2</sub>N + H<sup>+</sup>, 6%), 151.1304 (C<sub>10</sub>H<sub>10</sub>D<sub>3</sub>N + H<sup>+</sup>, 20%), 152.1362 (C<sub>10</sub>H<sub>9</sub>D<sub>4</sub>N + H<sup>+</sup>, 25%), 153.1420 (C<sub>10</sub>H<sub>8</sub>D<sub>5</sub>N + H<sup>+</sup>, 18%), 154.1481 (C<sub>10</sub>H<sub>7</sub>D<sub>6</sub>N + H<sup>+</sup>, 12%), 155.1543 (C<sub>10</sub>H<sub>6</sub>D<sub>7</sub>N + H<sup>+</sup>, 9%), 156.1607 (C<sub>10</sub>H<sub>5</sub>D<sub>8</sub>N + H<sup>+</sup>, 8%), 157.1671 (C<sub>10</sub>H<sub>4</sub>D<sub>9</sub>N + H<sup>+</sup>, 1%).

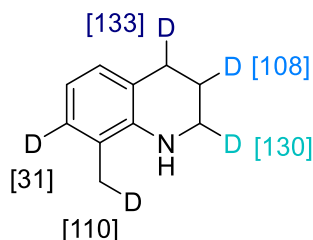

**8-(Methyl-*d*)-1,2,3,4-tetrahydroquinoline-2,3,4-*d*<sub>3</sub> (38b).** The title product was obtained with 74% yield (44.8 mg, 0.4 mmol scale) as white solid. <sup>1</sup>H NMR (400 MHz, CDCl<sub>3</sub>) δ 6.92-6.87 (m, 2.00H), 6.61-6.57 (m, 0.69H), 3.57-3.37 (m, 1.70H), 2.87-2.79 (m, 0.67H), 2.11-2.08 (m, 1.90H), 1.97-1.92 (m, 0.92H); <sup>13</sup>C NMR (101 MHz, CDCl<sub>3</sub>) δ 142.91, 128.02, 127.91, 127.56, 127.45, 121.38, 121.29, 121.01, 120.95, 116.58, 42.08 (m, labeled), 27.01 (m, labeled), 21.82 (m, labeled), 17.36, 17.08 (m, labeled).

Deuterium incorporation: 5.1D/molecule (<sup>1</sup>H-NMR), 6.1 D/molecule [HRMS (ESI)].

DYQ-1-128-7 #457 RT: 3.41 AV: 1 NL: 2.22E7  
T: FTMS + p ESI Full ms [100.00-1000.00]

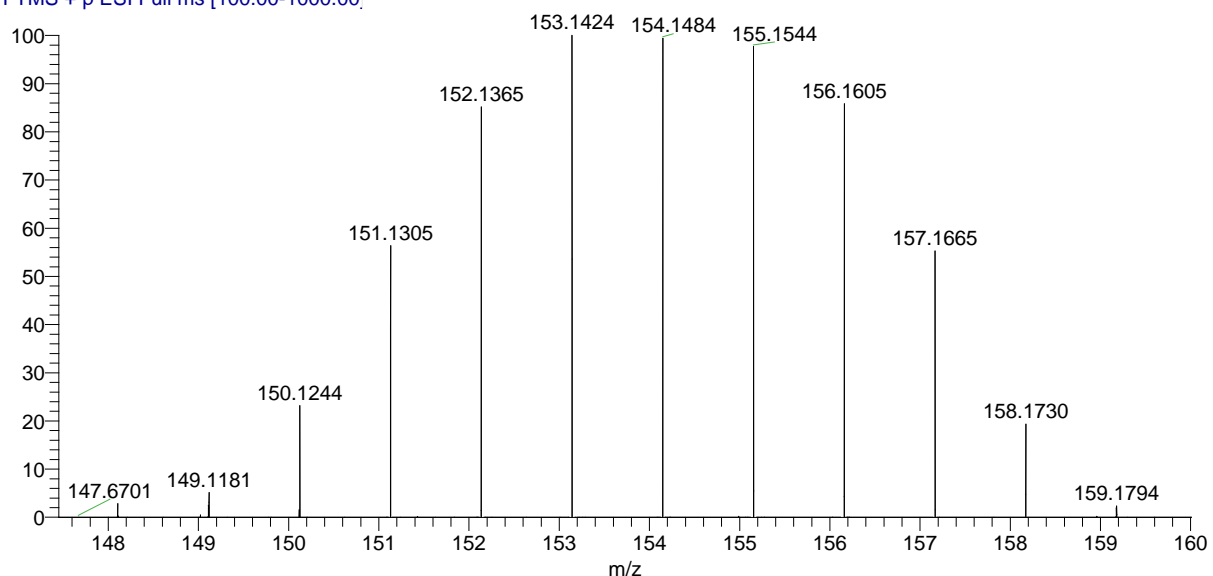

149.1181 (C<sub>10</sub>H<sub>12</sub>DN + H<sup>+</sup>, 1%), 150.1244 (C<sub>10</sub>H<sub>11</sub>D<sub>2</sub>N + H<sup>+</sup>, 3%), 151.1305 (C<sub>10</sub>H<sub>10</sub>D<sub>3</sub>N + H<sup>+</sup>, 8%), 152.1365 (C<sub>10</sub>H<sub>9</sub>D<sub>4</sub>N + H<sup>+</sup>, 13%), 153.1424 (C<sub>10</sub>H<sub>8</sub>D<sub>5</sub>N + H<sup>+</sup>, 15%), 154.1484 (C<sub>10</sub>H<sub>7</sub>D<sub>6</sub>N + H<sup>+</sup>, 16%), 155.1544 (C<sub>10</sub>H<sub>6</sub>D<sub>7</sub>N + H<sup>+</sup>, 16%), 156.1605 (C<sub>10</sub>H<sub>5</sub>D<sub>8</sub>N + H<sup>+</sup>, 15%), 157.1665 (C<sub>10</sub>H<sub>4</sub>D<sub>9</sub>N + H<sup>+</sup>, 10%), 158.1730 (C<sub>10</sub>H<sub>3</sub>D<sub>10</sub>N + H<sup>+</sup>, 4%).

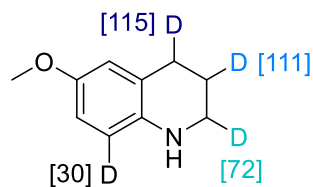



**6-Methoxy-1,2,3,4-tetrahydroquinoline-2,2,3,4-*d*<sub>4</sub> (39b).** The title product was obtained with 52% yield (35.0 mg, 0.4 mmol scale) as white solid. <sup>1</sup>H NMR (400 MHz, CDCl<sub>3</sub>) δ 6.62-6.57 (m, 1.98H), 6.47 (d, *J* = 8.4 Hz, 0.70H), 3.74 (s, 3.00H), 3.26-3.24 (m, 0.28H), 2.89-2.74 (m, 1.85H), 1.94-1.89 (m, 0.89H); <sup>13</sup>C NMR (101 MHz, CDCl<sub>3</sub>) δ 157.93, 151.99, 139.07, 130.97, 128.99, 123.05, 122.53, 115.77, 115.07, 113.07, 112.98, 105.29, 105.24, 56.00, 55.73, 41.93 (m, labeled), 38.90, 30.54, 29.11, 26.91 (m, labeled), 23.92, 23.19, 22.01 (m, labeled).

Deuterium incorporation: 4.3 D/molecule (<sup>1</sup>H-NMR), 4.5 D/molecule [HRMS (ESI)]

DYQ-1-42-2 #110-300 RT: 0.81-2.19 AV: 191 NL: 3.51E7  
T: FTMS + p ESI Full ms [70.00-300.00]

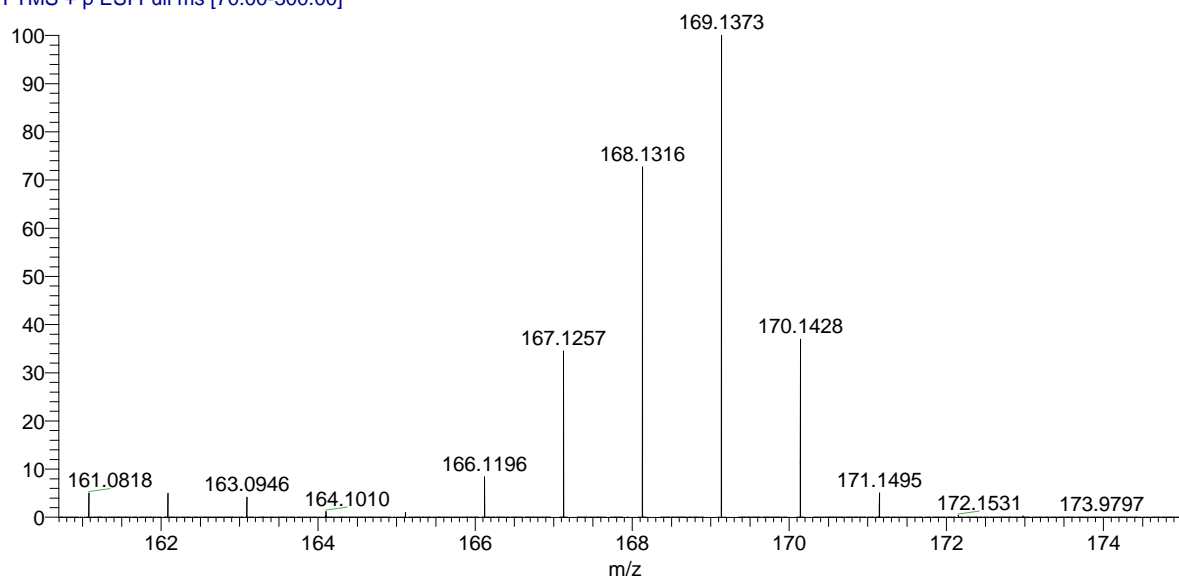

166.1196 (C<sub>10</sub>H<sub>11</sub>D<sub>2</sub>NO + H<sup>+</sup>, 3%), 167.1257 (C<sub>10</sub>H<sub>10</sub>D<sub>3</sub>NO + H<sup>+</sup>, 13%), 168.1316 (C<sub>10</sub>H<sub>9</sub>D<sub>4</sub>NO + H<sup>+</sup>, 28%), 169.1373 (C<sub>10</sub>H<sub>8</sub>D<sub>5</sub>NO + H<sup>+</sup>, 38%), 170.1428 (C<sub>10</sub>H<sub>7</sub>D<sub>6</sub>NO + H<sup>+</sup>, 15%), 171.1495 (C<sub>10</sub>H<sub>6</sub>D<sub>7</sub>NO + H<sup>+</sup>, 2%).

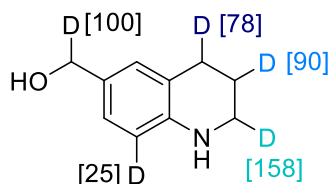

**(1,2,3,4-Tetrahydroquinolin-6-yl-2,3,4-*d*<sub>3</sub>)methan-*d*-ol (40b).** The title product was obtained with 70% yield (46.5 mg, 0.4 mmol scale) as white solid. <sup>1</sup>H NMR (400 MHz, CDCl<sub>3</sub>) δ 7.00-6.98 (m, 1.00H), 6.88-6.86 (m, 1.01H), 6.60-6.54 (m, 0.38H), 6.48-6.43 (m, 0.37H), 4.52-4.51 (m, 0.88H), 4.32 (d, *J* = 18.0 Hz, 1.00H), 3.34-3.28 (m, 0.42H), 2.78-2.71 (m, 1.22H), 1.95-1.91 (m, 1.10H); <sup>13</sup>C NMR (101 MHz, CDCl<sub>3</sub>) δ 145.91, 145.19, 144.73, 143.83, 129.49, 129.31, 128.82, 128.20, 128.10, 127.88, 127.72, 127.60, 127.34, 126.98, 126.87, 126.56, 126.45, 125.82, 125.71, 125.60, 125.46, 125.37, 125.26, 122.49, 122.35, 122.30, 121.81, 121.55, 114.56, 114.30, 111.30, 111.07, 65.75, 55.09, 54.95, 54.79, 54.65, 49.05 (m, labeled), 41.58 (m, labeled), 27.94 (m, labeled), 26.59 (m, labeled), 21.84 (m, labeled).

Deuterium incorporation: 4.5 D/molecule (<sup>1</sup>H-NMR), 4.2 D/molecule [HRMS (ESI)].

DYQ-1-71-4 #469-571 RT: 3.50-4.26 AV: 103 NL: 1.27E5  
T: FTMS + p ESI Full ms [100.00-350.00]

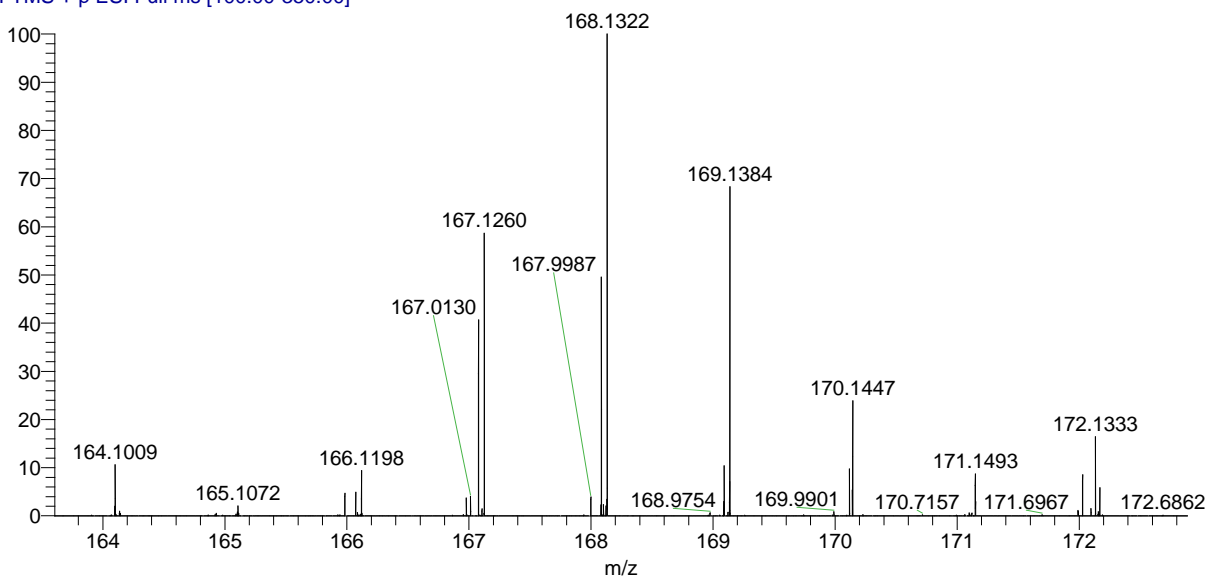

166.1198 (C<sub>10</sub>H<sub>11</sub>D<sub>2</sub>NO + H<sup>+</sup>, 5%), 167.1260 (C<sub>10</sub>H<sub>10</sub>D<sub>3</sub>NO + H<sup>+</sup>, 22%), 168.1322 (C<sub>10</sub>H<sub>9</sub>D<sub>4</sub>NO + H<sup>+</sup>, 36%), 169.1384 (C<sub>10</sub>H<sub>8</sub>D<sub>5</sub>NO + H<sup>+</sup>, 25%), 170.1447 (C<sub>10</sub>H<sub>7</sub>D<sub>6</sub>NO + H<sup>+</sup>, 9%), 171.1493 (C<sub>10</sub>H<sub>6</sub>D<sub>7</sub>NO + H<sup>+</sup>, 2%).

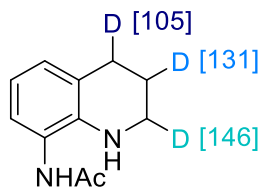

***N*-(1,2,3,4-tetrahydroquinolin-8-yl-2,3,4-*d*<sub>3</sub>)acetamide (41b).** The title product was obtained with 91% yield (70.4 mg, 0.4 mmol scale) as white solid. <sup>1</sup>H NMR (400 MHz, CDCl<sub>3</sub>) δ 7.40 (s, 0.70H), 7.01-6.92 (m, 1.27H), 6.86 (d, *J* = 6.0 Hz, 0.70H), 6.82 (d, *J* = 6.8 Hz, 0.30H), 6.62 (t, *J* = 7.6 Hz, 0.70H), 6.55 (t, *J* = 7.6 Hz, 0.30H), 3.48-3.25 (m, 1.54H), 2.77-2.73 (m, 0.95H), 2.15 (s, 2.11H), 1.89 (s, 0.90H), 1.85-1.82 (m, 0.69H); <sup>13</sup>C NMR (101 MHz, CDCl<sub>3</sub>) δ 174.68, 169.52, 141.53, 139.39, 129.27, 127.83, 126.58, 124.14, 123.58, 123.34, 122.59, 121.57, 117.29, 115.89, 41.68 (m, labeled), 26.93 (m, labeled), 23.80, 21.32 (m, labeled), 20.57.

Deuterium incorporation: 3.8 D/molecule (<sup>1</sup>H-NMR), 3.8 D/molecule [HRMS (ESI)].

DYQ-1-107-4 #455 RT: 3.39 AV: 1 NL: 8.63E7  
T: FTMS + p ESI Full ms [100.00-1000.00]

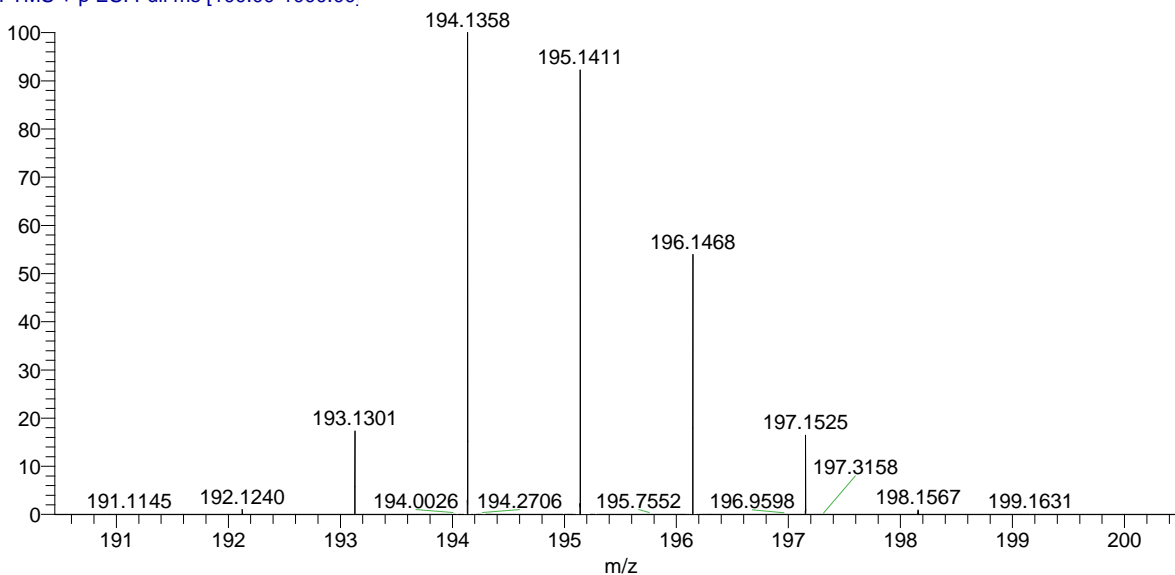

193.1301 (C<sub>11</sub>H<sub>12</sub>D<sub>2</sub>N<sub>2</sub>O + H<sup>+</sup>, 7%), 194.1358 (C<sub>11</sub>H<sub>11</sub>D<sub>3</sub>N<sub>2</sub>O + H<sup>+</sup>, 35%), 195.1411 (C<sub>11</sub>H<sub>10</sub>D<sub>4</sub>N<sub>2</sub>O + H<sup>+</sup>, 32%), 196.1468 (C<sub>11</sub>H<sub>9</sub>D<sub>5</sub>N<sub>2</sub>O + H<sup>+</sup>, 20%), 197.1525 (C<sub>11</sub>H<sub>8</sub>D<sub>6</sub>N<sub>2</sub>O + H<sup>+</sup>, 6%).

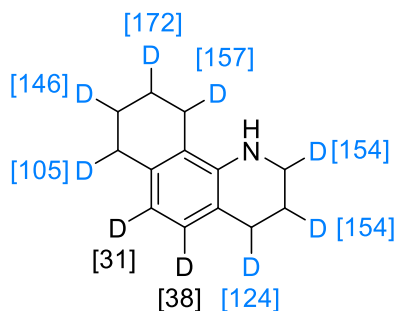

**1,2,3,4,7,8,9,10-Octahydrobenzo[h]quinoline-2,2,3,3,4,7,8,9,9,10,10-*d*<sub>11</sub> (42b).** The title product was obtained with 76% yield (60.4 mg, 0.4 mmol scale) as colorless liquid. <sup>1</sup>H NMR (400 MHz, CDCl<sub>3</sub>) δ 6.85-6.83 (m, 0.62H), 6.49-6.47 (m, 0.69H), 3.68 (s, 0.88H), 3.43-3.39 (m, 0.46H), 2.83-2.79 (m, 0.76H), 2.77-2.73 (m, 0.95H), 2.40-2.36 (m, 0.43H), 2.01-1.94 (m, 0.46H), 1.90-1.87 (m, 0.28H), 1.80-1.75 (m, 0.54H); <sup>13</sup>C NMR (101 MHz, CDCl<sub>3</sub>) δ 142.31, 135.36, 126.61, 126.50, 120.41, 120.36, 118.96 (m, labeled), 117.60, 117.49, 41.89 (m, labeled), 29.53 (m, labeled), 26.84 (m, labeled), 22.43 (m, labeled), 19.21.

Deuterium incorporation: 10.8 D/molecule (<sup>1</sup>H-NMR), 10.7 D/molecule [HRMS (ESI)].

DYQ-1-118-1 #886 RT: 6.60 AV: 1 NL: 1.29E7  
T: FTMS + p ESI Full ms [100.00-350.00]

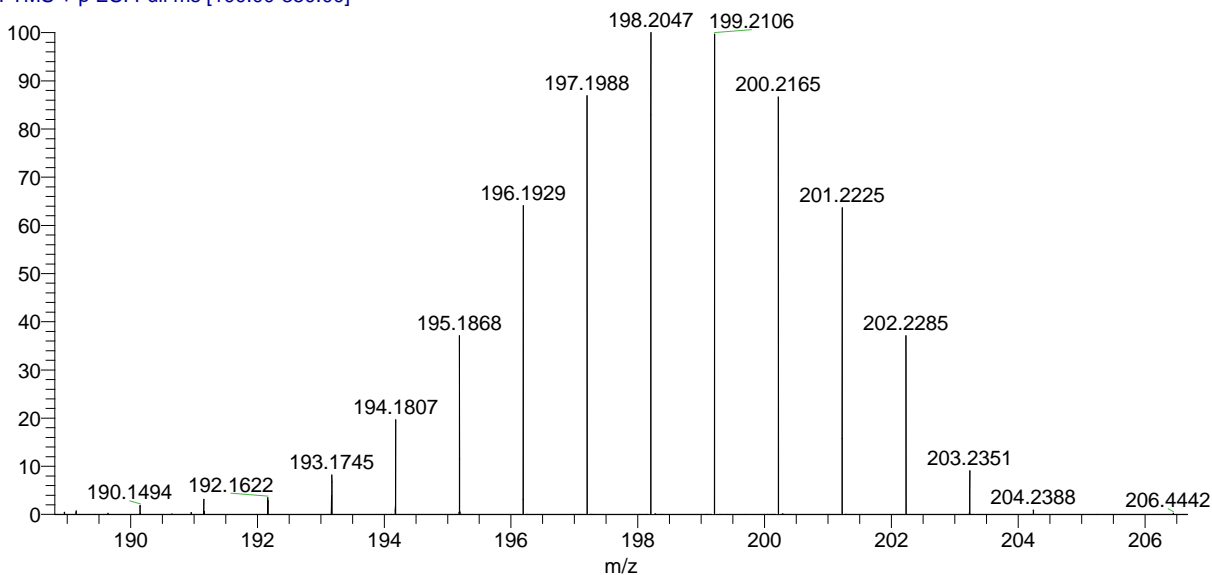

193.1745 (C<sub>13</sub>H<sub>12</sub>D<sub>5</sub>N + H<sup>+</sup>, 1%), 194.1807 (C<sub>13</sub>H<sub>11</sub>D<sub>6</sub>N + H<sup>+</sup>, 3%), 195.1868 (C<sub>13</sub>H<sub>10</sub>D<sub>7</sub>N + H<sup>+</sup>, 6%), 196.1929 (C<sub>13</sub>H<sub>9</sub>D<sub>8</sub>N + H<sup>+</sup>, 9%), 197.1988 (C<sub>13</sub>H<sub>8</sub>D<sub>9</sub>N + H<sup>+</sup>, 12%), 198.2047 (C<sub>13</sub>H<sub>7</sub>D<sub>10</sub>N + H<sup>+</sup>, 15%), 199.2106 (C<sub>13</sub>H<sub>6</sub>D<sub>11</sub>N + H<sup>+</sup>, 16%), 200.2165 (C<sub>13</sub>H<sub>5</sub>D<sub>12</sub>N + H<sup>+</sup>, 15%), 201.2225 (C<sub>13</sub>H<sub>4</sub>D<sub>13</sub>N + H<sup>+</sup>, 12%), 202.2285 (C<sub>13</sub>H<sub>3</sub>D<sub>14</sub>N + H<sup>+</sup>, 8%), 203.2351 (C<sub>13</sub>H<sub>2</sub>D<sub>15</sub>N + H<sup>+</sup>, 3%).

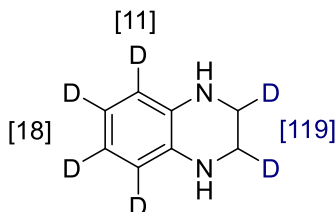

**1,2,3,4-Tetrahydroquinoxaline-2,3-*d*<sub>2</sub> (43b).** The title product was obtained with 76% yield (41.2 mg, 0.4 mmol scale) as white solid. <sup>1</sup>H NMR (400 MHz, CDCl<sub>3</sub>) δ 6.62-6.58 (m, 1.78H), 6.53-6.49 (m, 1.65H), 3.66 (s, 2.00H), 3.43-3.40 (m, 1.63H); <sup>13</sup>C NMR (101 MHz, CDCl<sub>3</sub>) δ 133.80, 118.99, 114.95, 41.19 (m, labeled).

Deuterium incorporation: 2.9D/molecule (<sup>1</sup>H-NMR), 2.8 D/molecule [HRMS (ESI)]

DYQ-1-52-2 #114-171 RT: 0.84-1.26 AV: 58 NL: 8.88E6  
T: FTMS + p ESI Full ms [100.00-500.00]

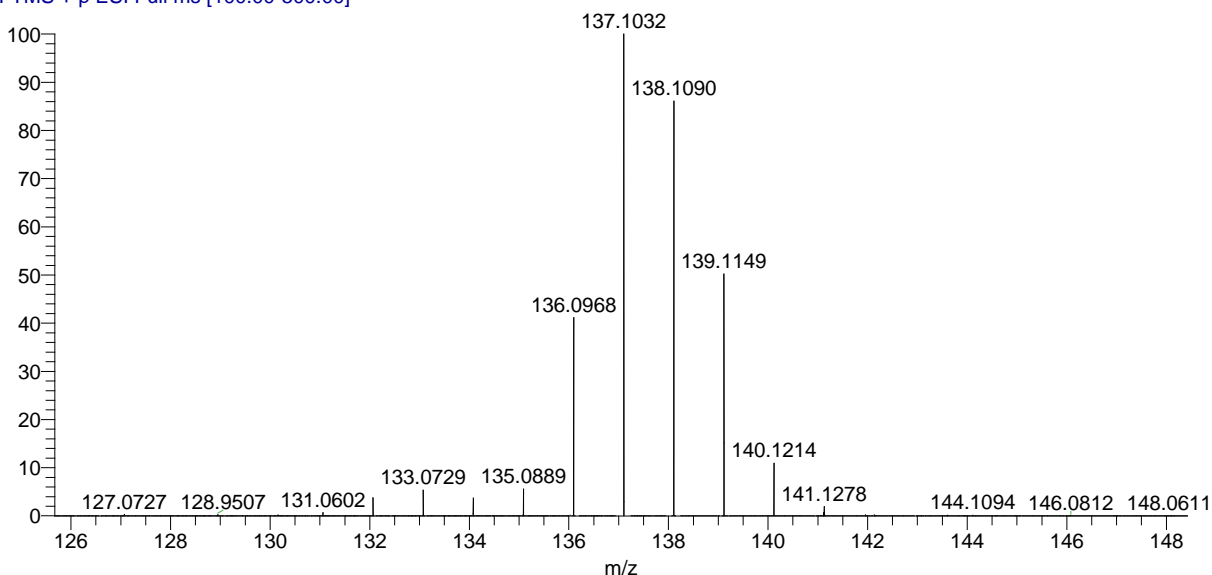

135.0889 (C<sub>8</sub>H<sub>10</sub>N<sub>2</sub> + H<sup>+</sup>, 1%), 136.0968 (C<sub>8</sub>H<sub>9</sub>D<sub>1</sub>N<sub>2</sub> + H<sup>+</sup>, 12%), 137.1032 (C<sub>8</sub>H<sub>8</sub>D<sub>2</sub>N<sub>2</sub> + H<sup>+</sup>, 30%), 138.1090 (C<sub>8</sub>H<sub>7</sub>D<sub>3</sub>N<sub>2</sub> + H<sup>+</sup>, 33%), 139.1149 (C<sub>8</sub>H<sub>6</sub>D<sub>4</sub>N<sub>2</sub> + H<sup>+</sup>, 19%), 140.1214 (C<sub>8</sub>H<sub>5</sub>D<sub>5</sub>N<sub>2</sub> + H<sup>+</sup>, 4%), 141.1278 (C<sub>8</sub>H<sub>4</sub>D<sub>6</sub>N<sub>2</sub> + H<sup>+</sup>, 1%).

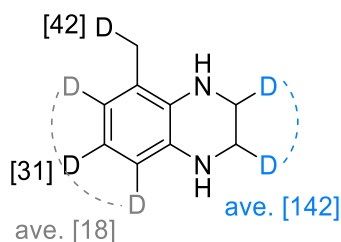

**5-Methyl-1,2,3,4-tetrahydroquinoxaline-2,3-*d*<sub>2</sub> (44b).** The title product was obtained with 60% yield (36.0 mg, 0.4 mmol scale) as white solid. <sup>1</sup>H NMR (400 MHz, CDCl<sub>3</sub>) δ 6.56-6.51 (m, 1.64H), 6.44-6.41 (m, 0.69H), 3.47-3.39 (m, 3.16H), 2.19-2.10 (m, 2.58H); <sup>13</sup>C NMR (101 MHz, CDCl<sub>3</sub>)

$\delta$  133.20, 131.82, 126.02, 124.43, 122.80, 122.38, 120.70, 120.58, 118.20, 118.08, 113.17, 41.21 (m, labeled), 17.68, 17.48, 17.11.

Deuterium incorporation: 3.9 D/molecule ( $^1\text{H}$ -NMR), 4.1 D/molecule [HRMS (ESI)]

DYQ-1-70-4 #133 RT: 0.98 AV: 1 NL: 2.52E7  
T: FTMS + p ESI Full ms [100.00-500.00]

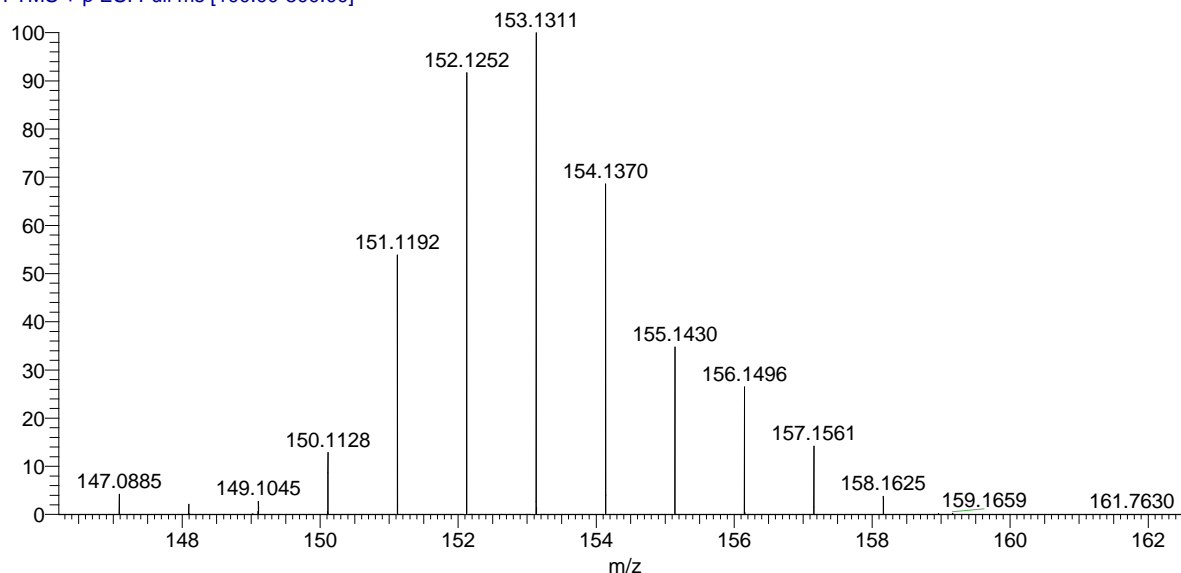

150.1128 ( $\text{C}_9\text{H}_{11}\text{DN}_2 + \text{H}^+$ , 3%), 151.1192 ( $\text{C}_9\text{H}_{10}\text{D}_2\text{N}_2 + \text{H}^+$ , 13%), 152.1252 ( $\text{C}_9\text{H}_9\text{D}_3\text{N}_2 + \text{H}^+$ , 23%), 153.1311 ( $\text{C}_9\text{H}_8\text{D}_4\text{N}_2 + \text{H}^+$ , 25%), 154.1370 ( $\text{C}_9\text{H}_7\text{D}_5\text{N}_2 + \text{H}^+$ , 16%), 155.1430 ( $\text{C}_9\text{H}_6\text{D}_6\text{N}_2 + \text{H}^+$ , 9%), 156.1496 ( $\text{C}_9\text{H}_5\text{D}_7\text{N}_2 + \text{H}^+$ , 6%), 157.1561 ( $\text{C}_9\text{H}_4\text{D}_8\text{N}_2 + \text{H}^+$ , 4%), 158.1625 ( $\text{C}_9\text{H}_3\text{D}_9\text{N}_2 + \text{H}^+$ , 1%).

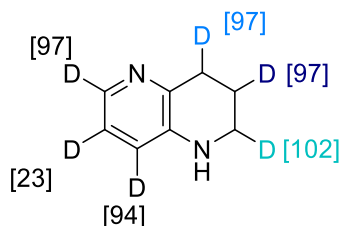

**1,2,3,4-Tetrahydro-1,5-naphthyridine-2,3,4,6,7,8- $d_6$  (45b).** The title product was obtained with 72% yield (39.1 mg, 0.4 mmol scale) as white solid.  $^1\text{H}$  NMR (400 MHz,  $\text{CDCl}_3$ )  $\delta$  7.85 (d,  $J$  = 4.8 Hz, 0.03H), 6.89 (s, 0.77H), 6.74 (d,  $J$  = 8.0 Hz, 0.06H), 3.91 (s, 1.00H), 3.31-3.26 (m, 0.98H), 2.96-2.90 (m, 1.03H), 2.04-1.97 (m, 1.03H);  $^{13}\text{C}$  NMR (101 MHz,  $\text{CDCl}_3$ )  $\delta$  142.51, 141.25, 137.30 (m, labeled), 121.92, 120.31 (m, labeled), 41.14 (m, labeled), 29.72 (m, labeled), 21.21 (m, labeled).

Deuterium incorporation: 5.1 D/molecule ( $^1\text{H}$ -NMR), 5.0 D/molecule [HRMS (ESI)]

DYQ-1-36-2 #115-209 RT: 0.85-1.54 AV: 95 NL: 1.21E7  
T: FTMS + p ESI Full ms [70.00-300.00]

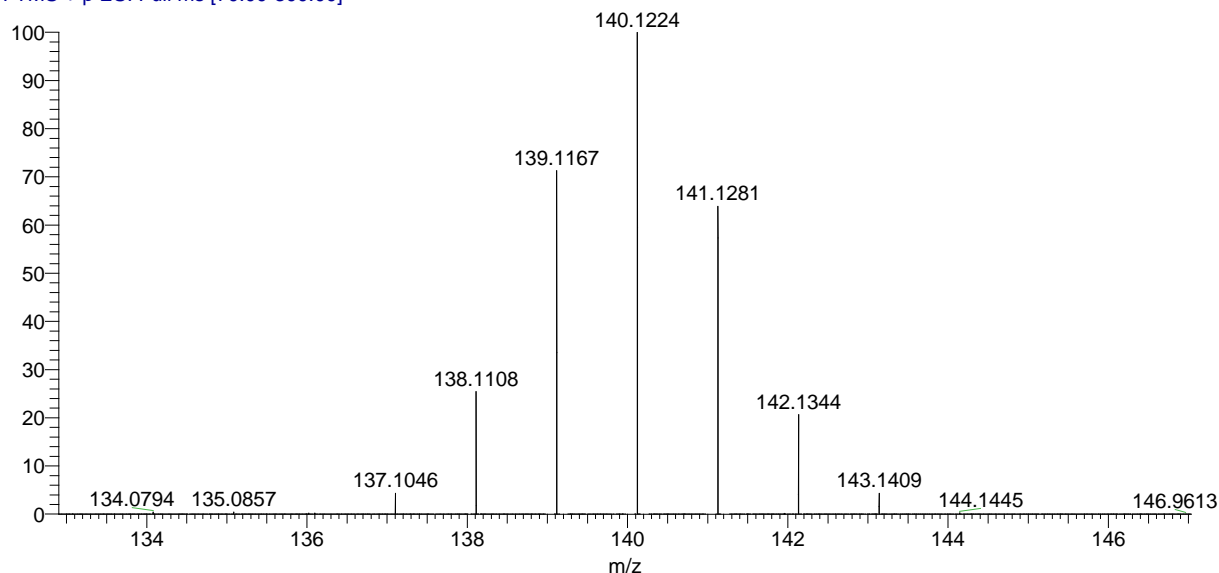

137.1046 ( $\text{C}_8\text{H}_8\text{D}_2\text{N}_2 + \text{H}^+$ , 1%), 138.1108 ( $\text{C}_8\text{H}_7\text{D}_3\text{N}_2 + \text{H}^+$ , 8%), 139.1167 ( $\text{C}_8\text{H}_6\text{D}_4\text{N}_2 + \text{H}^+$ , 23%), 140.1224 ( $\text{C}_8\text{H}_5\text{D}_5\text{N}_2 + \text{H}^+$ , 35%), 141.1281 ( $\text{C}_8\text{H}_4\text{D}_6\text{N}_2 + \text{H}^+$ , 23%), 142.1344 ( $\text{C}_8\text{H}_3\text{D}_7\text{N}_2 + \text{H}^+$ , 8%), 143.1409 ( $\text{C}_8\text{H}_2\text{D}_8\text{N}_2 + \text{H}^+$ , 2%).

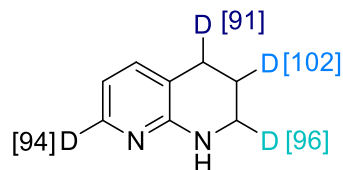

**1,2,3,4-Tetrahydro-1,8-naphthyridine-2,3,4,7- $d_4$  (46b).** The title product was obtained with 73% yield (40.3 mg, 0.4 mmol scale) as white solid.  $^1\text{H}$  NMR (400 MHz,  $\text{CDCl}_3$ )  $\delta$  7.83 (d,  $J = 5.6$  Hz, 0.06H), 7.10 (d,  $J = 7.6$  Hz, 0.97H), 6.46-6.43 (m, 0.97H), 5.20 (s, 1.00H), 3.35 (s, 1.04H), 2.67 (s, 1.09H), 1.85 (s, 0.98H);  $^{13}\text{C}$  NMR (101 MHz,  $\text{CDCl}_3$ )  $\delta$  156.49, 156.49, 145.97, 145.91, 145.65, 145.38, 136.23, 116.16, 116.11, 112.55, 112.41, 41.25 (m, labeled), 26.39 (m, labeled), 20.84 (m, labeled).

Deuterium incorporation: 3.8 D/molecule ( $^1\text{H}$ -NMR), 4.0 D/molecule [HRMS (ESI)].

DYQ-1-141-6 #711 RT: 3.02 AV: 1 NL: 6.43E7  
T: FTMS + p ESI Full ms [50.00-500.00]

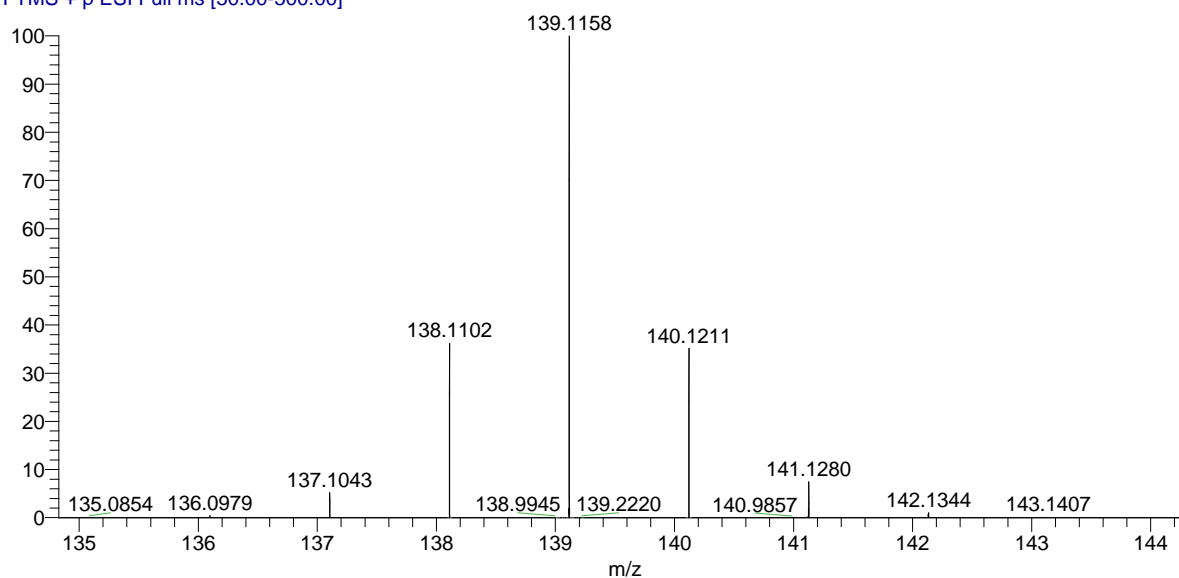

137.1043 ( $\text{C}_8\text{H}_8\text{D}_2\text{N}_2 + \text{H}^+$ , 3%), 138.1102 ( $\text{C}_8\text{H}_7\text{D}_3\text{N}_2 + \text{H}^+$ , 20%), 139.1158 ( $\text{C}_8\text{H}_6\text{D}_4\text{N}_2 + \text{H}^+$ , 58%), 140.1211 ( $\text{C}_8\text{H}_5\text{D}_5\text{N}_2 + \text{H}^+$ , 20%), 141.1280 ( $\text{C}_8\text{H}_4\text{D}_6\text{N}_2 + \text{H}^+$ , 2%).

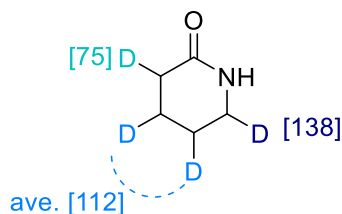

**Piperidin-2-one-3,4,5,6-*d*<sub>4</sub> (47b).** The title product was obtained with 98% yield (41.5 mg, 0.4 mmol scale) as white solid.  $^1\text{H}$  NMR (400 MHz,  $\text{CDCl}_3$ )  $\delta$  6.88 (s, 1.00H), 3.28-3.25 (m, 0.62H), 2.33-2.30 (m, 1.25H), 1.78-1.69 (m, 1.77H);  $^{13}\text{C}$  NMR (101 MHz,  $\text{CDCl}_3$ )  $\delta$  172.94, 41.96 (m, labeled), 31.23 (m, labeled), 21.71 (m, labeled), 20.37 (m, labeled).

Deuterium incorporation: 4.4 D/molecule ( $^1\text{H}$ -NMR), 4.5 D/molecule [HRMS (ESI)].



DYQ-1-35-1 #163-338 RT: 1.21-2.51 AV: 176 NL: 4.24E6  
T: FTMS + p ESI Full ms [70.00-300.00]

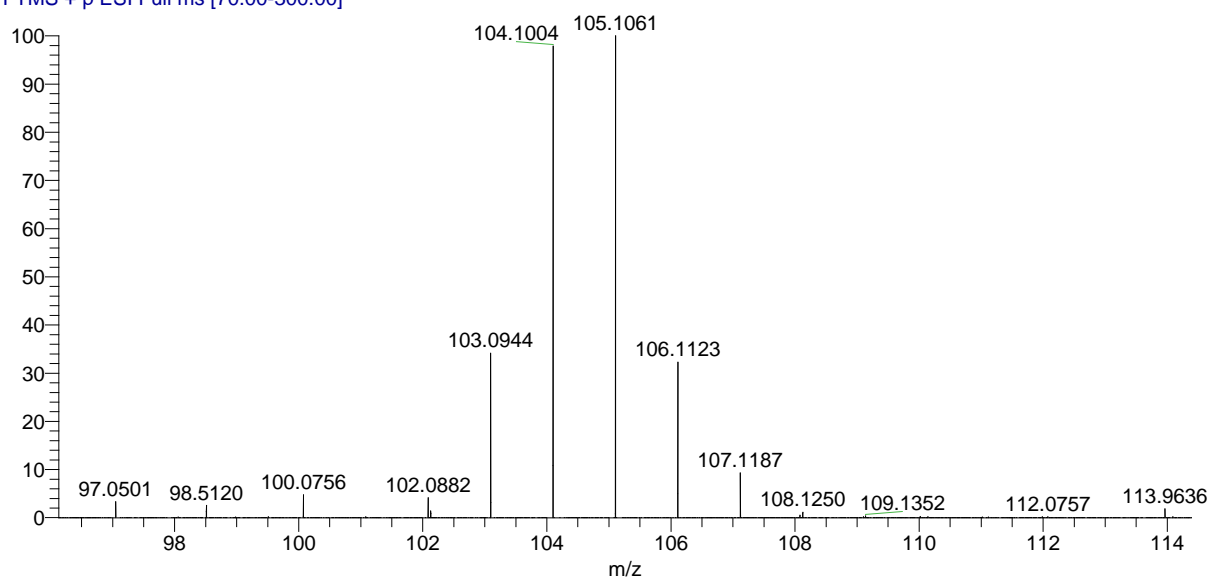

102.0882 ( $\text{C}_5\text{H}_7\text{D}_2\text{NO} + \text{H}^+$ , 2%), 103.0944 ( $\text{C}_5\text{H}_6\text{D}_3\text{NO} + \text{H}^+$ , 13%), 104.1004 ( $\text{C}_5\text{H}_5\text{D}_4\text{NO} + \text{H}^+$ , 45%), 105.1061 ( $\text{C}_5\text{H}_4\text{D}_5\text{NO} + \text{H}^+$ , 18%), 106.1123 ( $\text{C}_5\text{H}_3\text{D}_6\text{NO} + \text{H}^+$ , 17%), 107.1187 ( $\text{C}_5\text{H}_2\text{D}_7\text{NO} + \text{H}^+$ , 4%), 108.1250 ( $\text{C}_5\text{H}_1\text{D}_8\text{NO} + \text{H}^+$ , 1%).

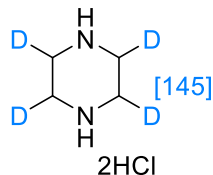

**Piperazine-2,3,5,6-*d*<sub>4</sub> (48b).** The title product was obtained with 78% yield (50.6 mg, 0.4 mmol scale) as white solid.  $^1\text{H}$  NMR (400 MHz,  $\text{D}_2\text{O}$ )  $\delta$  3.57-3.38 (m);  $^{13}\text{C}$  NMR (101 MHz,  $\text{D}_2\text{O}$ )  $\delta$  39.91 (m, labeled).

Deuterium incorporation: 5.8 D/molecule [HRMS (ESI)].

DYQ-1-47-3-1\_220526162941 #90-138 RT: 0.66-1.02 AV: 49 NL: 1.92E6  
T: FTMS + p ESI Full ms [70.00-300.00]

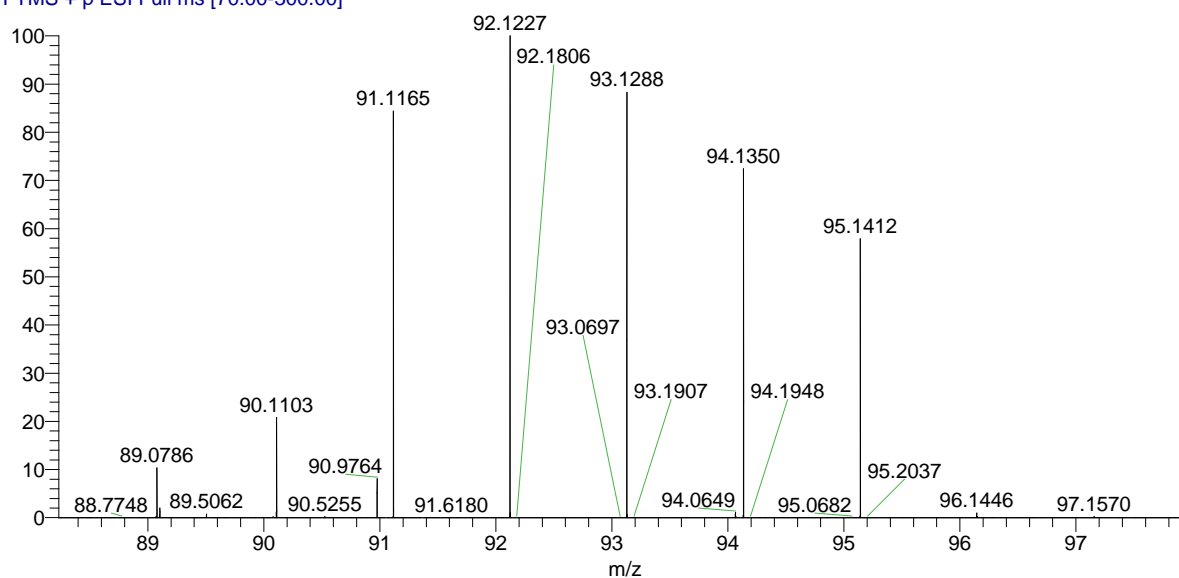

90.1103 ( $\text{C}_4\text{H}_7\text{D}_3\text{N}_2 + \text{H}^+$ , 4%), 91.1165 ( $\text{C}_4\text{H}_6\text{D}_4\text{N}_2 + \text{H}^+$ , 18%), 92.1227 ( $\text{C}_4\text{H}_5\text{D}_5\text{N}_2 + \text{H}^+$ , 21%), 93.1288 ( $\text{C}_4\text{H}_4\text{D}_6\text{N}_2 + \text{H}^+$ , 22%), 94.1350 ( $\text{C}_4\text{H}_3\text{D}_7\text{N}_2 + \text{H}^+$ , 19%), 95.1412 ( $\text{C}_4\text{H}_2\text{D}_8\text{N}_2 + \text{H}^+$ , 15%).

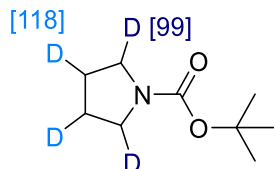

**tert-Butyl pyrrolidine-1-carboxylate-2,3,4,5-*d*<sub>4</sub> (49b)**. The title product was obtained with 56% yield (47.7 mg, 0.4 mmol scale) as colorless liquid.  $^1\text{H}$  NMR (400 MHz,  $\text{CDCl}_3$ )  $\delta$  3.30-3.23 (m, 2.03H), 1.79 (s, 1.64H), 1.44 (s, 9.00H);  $^{13}\text{C}$  NMR (101 MHz,  $\text{CDCl}_3$ )  $\delta$  154.84, 78.96, 45.52 (m, labeled), 28.67, 24.51 (m, labeled).

Deuterium incorporation: 4.3 D/molecule ( $^1\text{H}$ -NMR), 4.5 D/molecule [HRMS (ESI)].

DYQ-1-42-1 #665-726 RT: 4.97-5.42 AV: 62 NL: 1.80E7  
T: FTMS + p ESI Full ms [70.00-300.00]

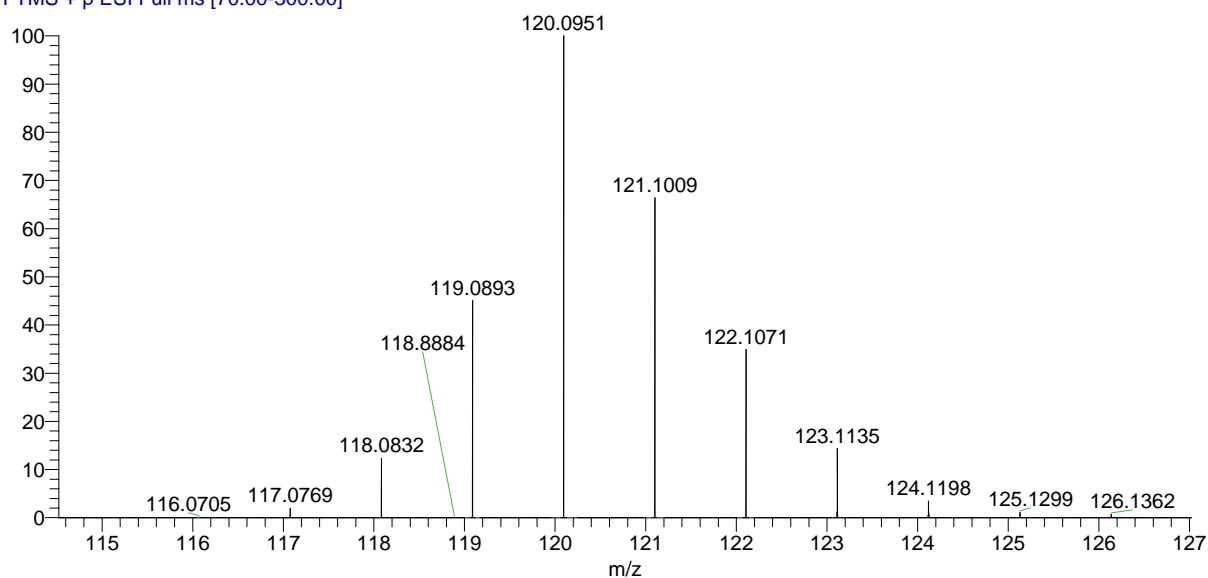

117.0769 ( $\text{C}_9\text{H}_{16}\text{DNO}_2 + \text{H}^+$ , 1%), 118.0832 ( $\text{C}_9\text{H}_{15}\text{D}_2\text{NO}_2 + \text{H}^+$ , 4%), 119.0893 ( $\text{C}_9\text{H}_{14}\text{D}_3\text{NO}_2 + \text{H}^+$ , 15%), 120.0951 ( $\text{C}_9\text{H}_{13}\text{D}_4\text{NO}_2 + \text{H}^+$ , 36%), 121.1009 ( $\text{C}_9\text{H}_{12}\text{D}_5\text{NO}_2 + \text{H}^+$ , 25%), 122.1071 ( $\text{C}_9\text{H}_{11}\text{D}_6\text{NO}_2 + \text{H}^+$ , 13%), 123.1135 ( $\text{C}_9\text{H}_{10}\text{D}_7\text{NO}_2 + \text{H}^+$ , 5%), 124.1198 ( $\text{C}_9\text{H}_9\text{D}_8\text{NO}_2 + \text{H}^+$ , 1%).

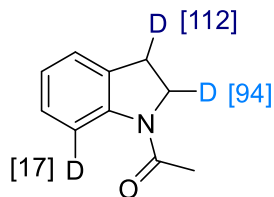

**1-(Indolin-1-yl-2,3-*d*<sub>2</sub>)ethan-1-one (50b).** The title product was obtained with 80% yield (51.9 mg, 0.4 mmol scale) as white solid.  $^1\text{H}$  NMR (400 MHz,  $\text{CDCl}_3$ )  $\delta$  8.22 (d,  $J = 8.4$  Hz, 0.83H), 7.26-7.12 (m, 2.02H), 7.01 (t,  $J = 7.4$  Hz, 1.00H), 4.11-3.96 (m, 1.06H), 3.20-3.04 (m, 0.88H), 2.44-2.22 (m, 3.00H);  $^{13}\text{C}$  NMR (101 MHz,  $\text{CDCl}_3$ )  $\delta$  168.88, 143.11, 131.20, 127.71, 126.07, 124.72, 123.73, 123.30, 117.11, 48.50 (m, labeled), 27.80 (m, labeled), 24.83, 24.41.

Deuterium incorporation: 2.2 D/molecule ( $^1\text{H}$ -NMR), 2.2 D/molecule [HRMS (ESI)].

DYQ-1-38-1 #634 RT: 4.73 AV: 1 NL: 8.26E6  
T: FTMS + p ESI Full ms [100.00-1000.00]

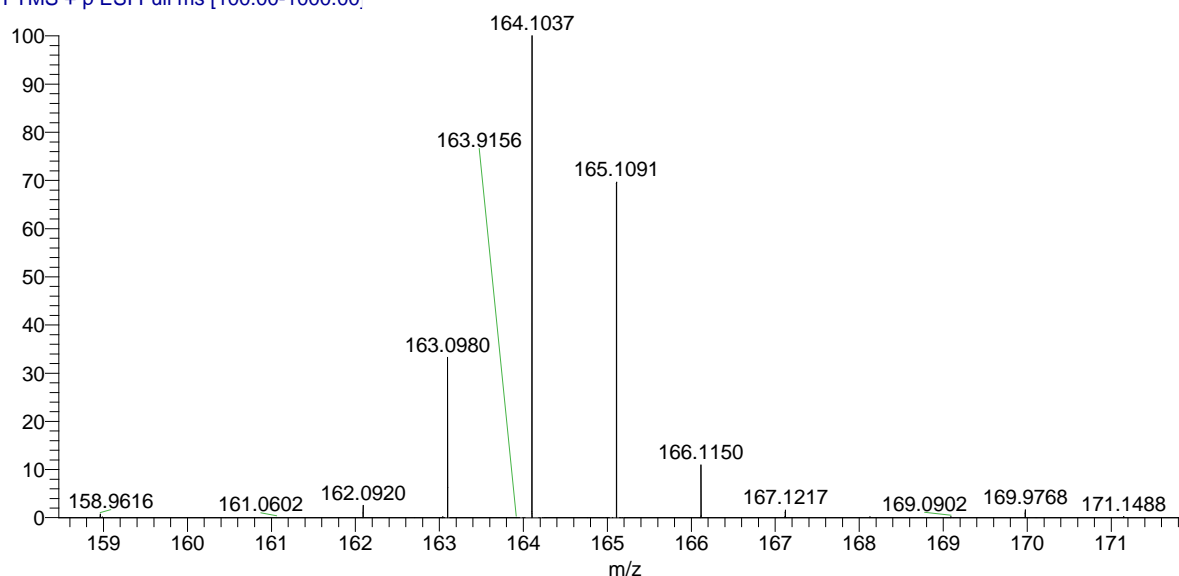

162.0902 ( $\text{C}_{10}\text{H}_{11}\text{D}_0\text{NO} + \text{H}^+$ , 1%), 163.0980 ( $\text{C}_{10}\text{H}_{10}\text{D}_1\text{NO} + \text{H}^+$ , 15%), 164.1037 ( $\text{C}_{10}\text{H}_9\text{D}_2\text{NO} + \text{H}^+$ , 50%), 165.1091 ( $\text{C}_{10}\text{H}_8\text{D}_3\text{NO} + \text{H}^+$ , 33%), 166.1217 ( $\text{C}_{10}\text{H}_7\text{D}_4\text{NO} + \text{H}^+$ , 1%).

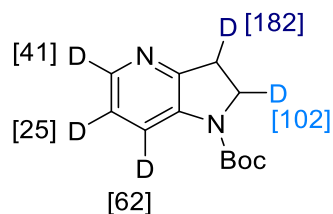

**tert-Butyl 2,3-dihydro-1H-pyrrolo[3,2-b]pyridine-1-carboxylate-2,3,7- $d_3$  (51b).** The title product was obtained with 79% yield (70.5 mg, 0.4 mmol scale) as white solid.  $^1\text{H}$  NMR (400 MHz,  $\text{CDCl}_3$ )  $\delta$  7.98 (s, 0.59H), 7.57 (s, 0.38H), 7.02 (d,  $J = 8.0$  Hz, 0.75H), 3.95 (s, 0.98H), 3.19 (t,  $J = 8.0$  Hz, 0.18H), 1.54 (s, 9.00H);  $^{13}\text{C}$  NMR (201 MHz,  $\text{CDCl}_3$ )  $\delta$  154.01, 153.29, 152.80, 142.52, 142.26, 137.76, 136.74, 121.88, 120.97, 120.88, 82.30, 81.26, 45.54 (m, labeled), 29.01 (m, labeled), 28.54.

Deuterium incorporation: 4.1 D/molecule ( $^1\text{H}$ -NMR), 4.0 D/molecule [HRMS (ESI)]

DYQ-1-81-3 #299-951 RT: 2.23-7.07 AV: 653 NL: 8.76E6  
T: FTMS + p ESI Full ms [100.00-500.00]

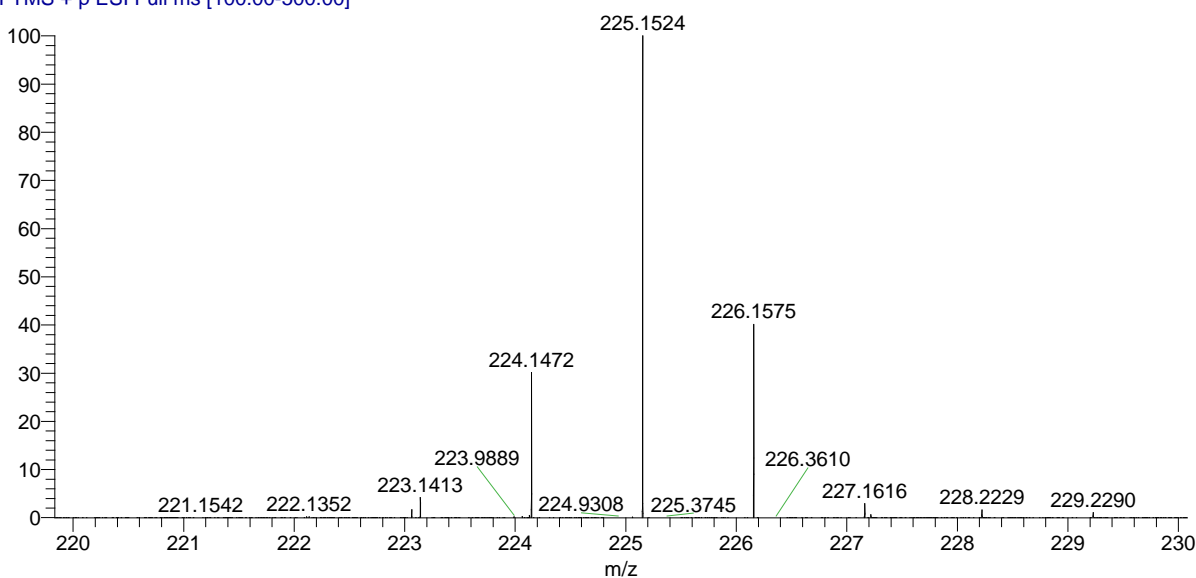

223.1413 ( $\text{C}_{12}\text{H}_{14}\text{D}_2\text{N}_2\text{O}_2 + \text{H}^+$ , 2%), 224.1472 ( $\text{C}_{12}\text{H}_{13}\text{D}_3\text{N}_2\text{O}_2 + \text{H}^+$ , 16%), 225.1524 ( $\text{C}_{12}\text{H}_{12}\text{D}_4\text{N}_2\text{O}_2 + \text{H}^+$ , 59%), 226.1575 ( $\text{C}_{12}\text{H}_{11}\text{D}_5\text{N}_2\text{O}_2 + \text{H}^+$ , 23%).

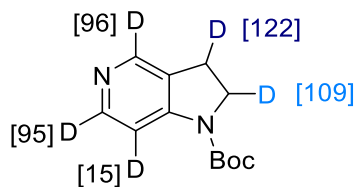

***tert*-Butyl 2,3-dihydro-1*H*-pyrrolo[3,2-*c*]pyridine-1-carboxylate-2,3,4,6-*d*<sub>4</sub> (52b)**. The title product was obtained with 69% yield (63.3 mg, 0.4 mmol scale) as white solid.  $^1\text{H}$  NMR (400 MHz,  $\text{CDCl}_3$ ) 7.95 (s, 0.04H), 7.85 (s, 0.05H), 7.60 (s, 0.85H), 3.95 (d,  $J = 10.0$  Hz, 0.91H), 3.10-3.06 (m, 0.78H), 1.54 (s, 9.00H);  $^{13}\text{C}$  NMR (101 MHz,  $\text{CDCl}_3$ )  $\delta$  152.24, 149.01 (m, labeled), 145.30 (m, labeled), 126.96 (m), 109.44, 81.97 (m), 47.52 (m, labeled), 28.42, 24.59 (m, labeled).

Deuterium incorporation: 4.4 D/molecule ( $^1\text{H}$ -NMR), 4.2 D/molecule [HRMS (ESI)].

DYQ-1-83-3\_221109151820 #512 RT: 3.82 AV: 1 NL: 6.58E7  
T: FTMS + p ESI Full ms [100.00-1000.00]

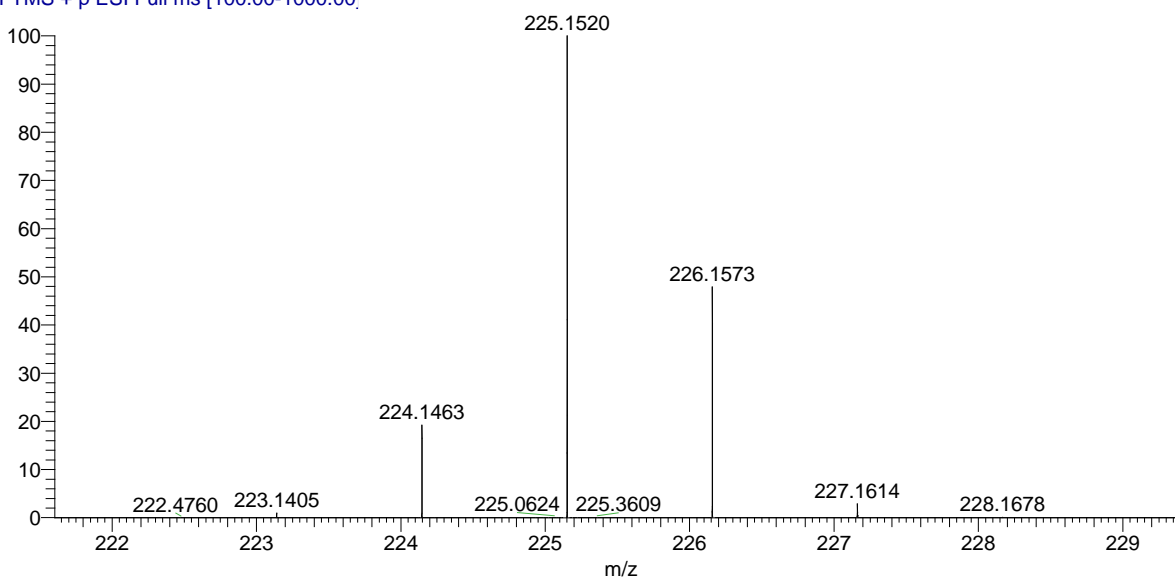

223.1405 ( $\text{C}_{12}\text{H}_{14}\text{D}_2\text{N}_2\text{O}_2 + \text{H}^+$ , 1%), 224.1463 ( $\text{C}_{12}\text{H}_{13}\text{D}_3\text{N}_2\text{O}_2 + \text{H}^+$ , 12%), 225.1520 ( $\text{C}_{12}\text{H}_{12}\text{D}_4\text{N}_2\text{O}_2 + \text{H}^+$ , 60%), 226.1573 ( $\text{C}_{12}\text{H}_{11}\text{D}_5\text{N}_2\text{O}_2 + \text{H}^+$ , 28%).

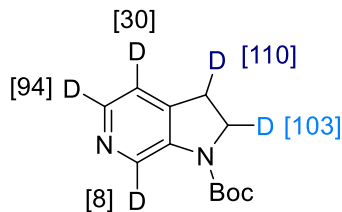

**tert-Butyl 2,3-dihydro-1H-pyrrolo[2,3-c]pyridine-1-carboxylate-2,3,5- $d_3$  (53b).** The title product was obtained with 73% yield (65.5 mg, 0.4 mmol scale) as white solid.  $^1\text{H}$  NMR (400 MHz,  $\text{CDCl}_3$ )  $\delta$  9.03 (s, 0.44H), 8.67 (s, 0.48H), 8.17 (d,  $J = 4.4$  Hz, 0.06H), 7.09 (s, 0.70H), 3.95 (d,  $J = 9.6$  Hz, 0.97H), 3.11-3.06 (m, 0.90H), 1.57 (s, 9.00H);  $^{13}\text{C}$  NMR (101 MHz,  $\text{CDCl}_3$ )  $\delta$  152.38, 143.20 (m, labeled), 140.33 (m, labeled), 136.07, 120.07, 81.24 (m), 46.77 (m, labeled), 28.59, 27.15 (m, labeled).

Deuterium incorporation: 3.5 D/molecule ( $^1\text{H}$ -NMR), 3.3 D/molecule [HRMS (ESI)]

DYQ-1-81-1 #376-619 RT: 2.80-4.59 AV: 244 NL: 8.13E6  
T: FTMS + p ESI Full ms [100.00-500.00]

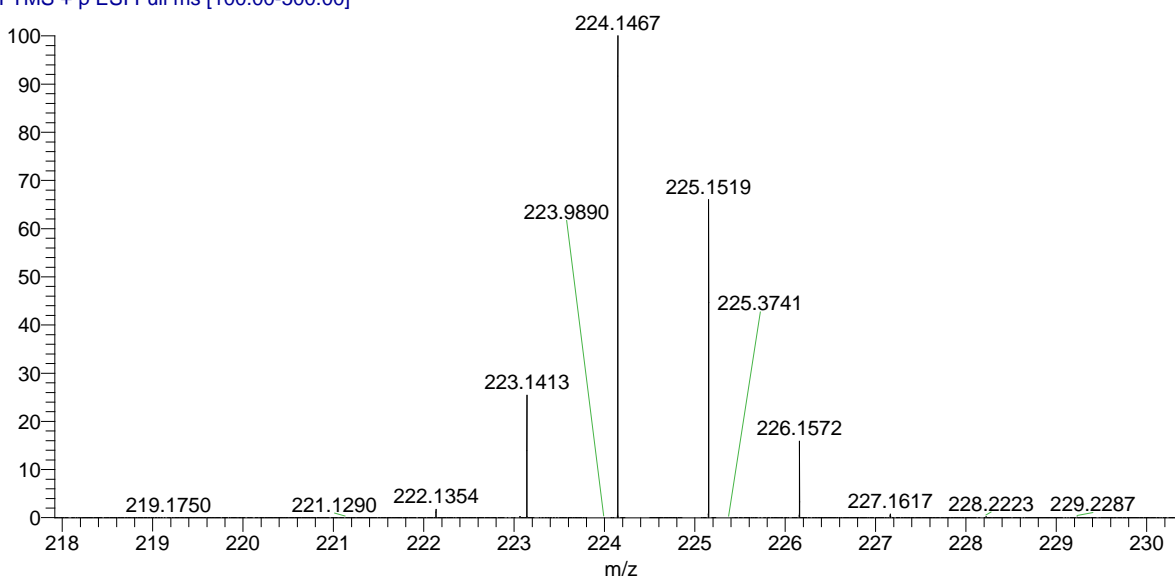

222.1354 ( $\text{C}_{12}\text{H}_{15}\text{DN}_2\text{O}_2 + \text{H}^+$ , 1%), 223.1413 ( $\text{C}_{12}\text{H}_{14}\text{D}_2\text{N}_2\text{O}_2 + \text{H}^+$ , 13%), 224.1467 ( $\text{C}_{12}\text{H}_{13}\text{D}_3\text{N}_2\text{O}_2 + \text{H}^+$ , 47%), 225.1519 ( $\text{C}_{12}\text{H}_{12}\text{D}_4\text{N}_2\text{O}_2 + \text{H}^+$ , 30%), 226.1572 ( $\text{C}_{12}\text{H}_{11}\text{D}_5\text{N}_2\text{O}_2 + \text{H}^+$ , 8%).

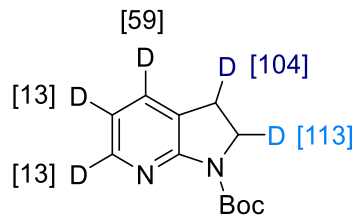

**tert-Butyl 2,3-dihydro-1H-pyrrolo[2,3-b]pyridine-1-carboxylate-2,3,4- $d_3$  (54b).** The title product was obtained with 63% yield (57.0 mg, 0.4 mmol scale) as white solid.  $^1\text{H}$  NMR (400 MHz,  $\text{CDCl}_3$ )  $\delta$  8.22 (dd,  $J = 1.2, 5.2$  Hz, 0.87H), 7.38 (dt,  $J = 1.4, 7.2$  Hz, 0.41H), 6.81-6.78 (m, 0.87H), 3.97 (d,  $J = 10.4$  Hz, 0.96H), 3.04-3.00 (m, 0.87H), 1.55 (s, 9.00H);  $^{13}\text{C}$  NMR (101 MHz,  $\text{CDCl}_3$ )  $\delta$  157.21, 151.20, 147.31, 132.81, 117.32, 117.22, 81.30, 46.22 (m, labeled), 28.51, 24.75 (m, labeled).

Deuterium incorporation: 3.0 D/molecule ( $^1\text{H}$ -NMR), 2.7 D/molecule [HRMS (ESI)]

Dyq-1-78-1 #483 RT: 3.60 AV: 1 NL: 1.91E7  
T: FTMS + p ESI Full ms [70.00-300.00]

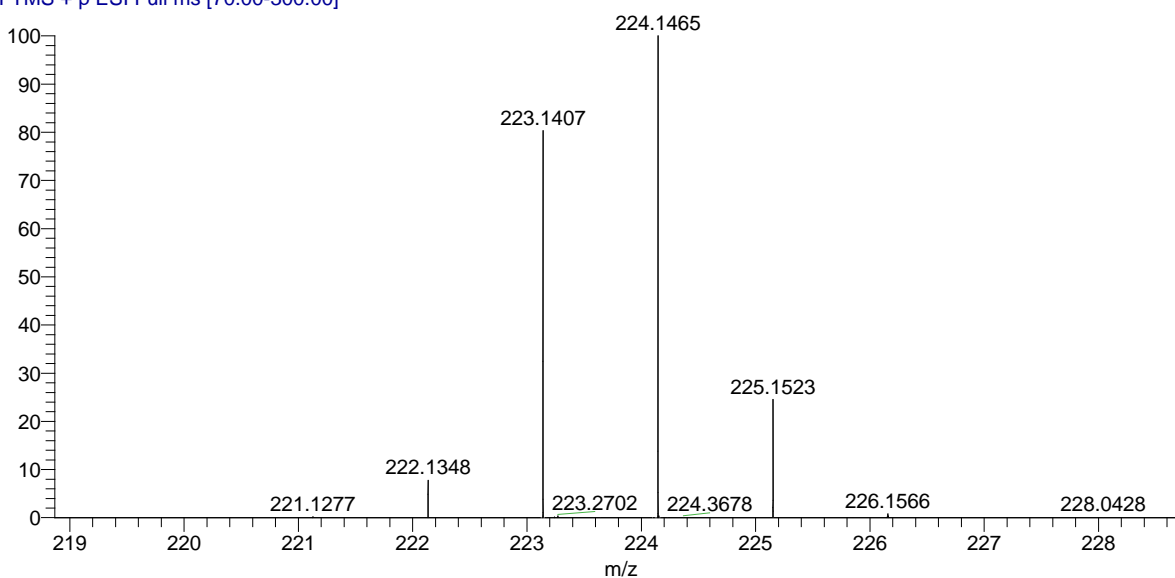

222.1348 ( $\text{C}_{12}\text{H}_{15}\text{D}_1\text{N}_2\text{O}_2 + \text{H}^+$ , 4%), 223.1407 ( $\text{C}_{12}\text{H}_{14}\text{D}_2\text{N}_2\text{O}_2 + \text{H}^+$ , 38%), 224.1465 ( $\text{C}_{12}\text{H}_{13}\text{D}_3\text{N}_2\text{O}_2 + \text{H}^+$ , 47%), ( $\text{C}_{12}\text{H}_{12}\text{D}_4\text{N}_2\text{O}_2 + \text{H}^+$ , 11%).

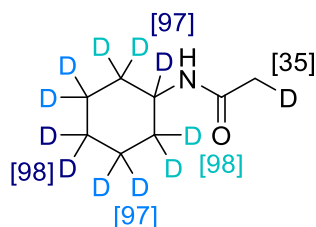

***N*-(cyclohexyl-*d*<sub>11</sub>)acetamide (1d).** The title product was obtained with 98% yield (59.4 mg, 0.4 mmol scale) as white solid.  $^1\text{H}$  NMR (400 MHz,  $\text{CDCl}_3$ )  $\delta$  5.48 (s, 1.00H), 2.21 (t,  $J = 7.6$  Hz, 0.03H), 2.03-1.93 (m, 2.65H), 1.85 (s, 0.06H), 1.64 (s, 0.07H), 1.55 (s, 0.03H), 1.29 (s, 0.05H), 1.08 (s, 0.02H), 1.05 (s, 0.04H);  $^{13}\text{C}$  NMR (101 MHz,  $\text{CDCl}_3$ )  $\delta$  169.32, 47.77 (m, labeled), 32.24 (m, labeled), 29.71 (m, labeled), 23.94 (m, labeled), 23.74.

Deuterium incorporation: 11.1 D/molecule ( $^1\text{H}$ -NMR), 11.2 D/molecule [HRMS (ESI)].



BFX-8-112-1 #555 RT: 4.14 AV: 1 NL: 5.49E7  
T: FTMS + p ESI Full ms [100.00-350.00]

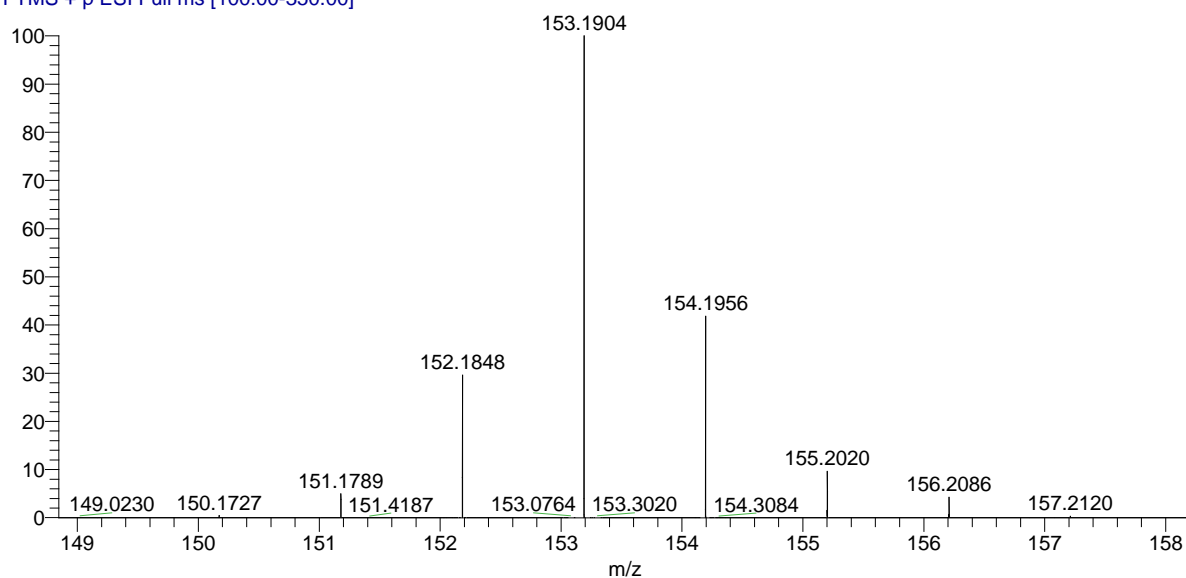

151.1789 ( $\text{C}_8\text{H}_6\text{D}_9\text{NO} + \text{H}^+$ , 3%), 152.1848 ( $\text{C}_8\text{H}_5\text{D}_{10}\text{NO} + \text{H}^+$ , 16%), 153.1904 ( $\text{C}_8\text{H}_4\text{D}_{11}\text{NO} + \text{H}^+$ , 52%), 154.1956 ( $\text{C}_8\text{H}_3\text{D}_{12}\text{NO} + \text{H}^+$ , 21%), 155.2020 ( $\text{C}_8\text{H}_2\text{D}_{13}\text{NO} + \text{H}^+$ , 5%), 156.2086 ( $\text{C}_8\text{H}_1\text{D}_{14}\text{NO} + \text{H}^+$ , 2%),

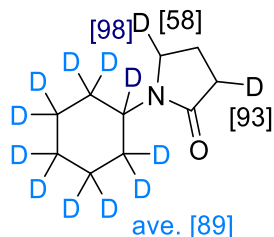

**1-(Cyclohexyl- $d_{11}$ )pyrrolidin-2-one-3,5- $d_2$  (2d).** The title product was obtained with 75% yield (51.7 mg, 0.4 mmol scale) as white solid.  $^1\text{H}$  NMR (400 MHz,  $\text{CDCl}_3$ )  $\delta$  3.94-3.90 (m, 0.02H), 3.32 (t,  $J = 7.0$  Hz, 1.42H), 2.39-2.33 (m, 1.07H), 2.01-1.94 (m, 2.00H), 1.72 (s, 0.05H), 1.67-1.60 (m, 0.17H), 1.30 (s, 0.89H), 1.02 (s, 0.03H);  $^{13}\text{C}$  NMR (101 MHz,  $\text{CDCl}_3$ )  $\delta$  174.42, 49.89 (m, labeled), 43.01, 31.83, 31.52 (m, labeled), 29.71 (m, labeled), 24.54 (m, labeled), 18.35, 18.25, 18.14.

Deuterium incorporation: 11.4 D/molecule ( $^1\text{H}$ -NMR), 11.0 D/molecule [HRMS (ESI)].

BFX-8-88-4 #618-772 RT: 4.62-5.76 AV: 155 NL: 6.02E6  
T: FTMS + p ESI Full ms [100.00-350.00]

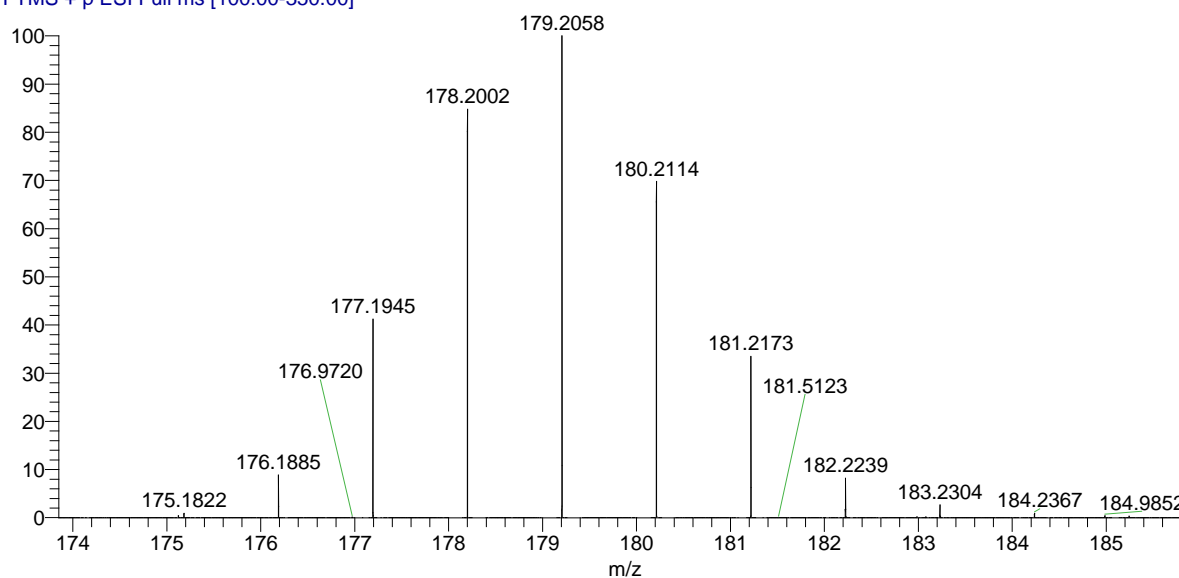

176.1885 ( $C_{10}H_9D_8NO + H^+$ , 2%), 177.1945 ( $C_{10}H_8D_9NO + H^+$ , 11%), 178.2002 ( $C_{10}H_7D_{10}NO + H^+$ , 24%), 179.2058 ( $C_{10}H_6D_{11}NO + H^+$ , 29%), 180.2114 ( $C_{10}H_5D_{12}NO + H^+$ , 20%), 181.2173 ( $C_{10}H_4D_{13}NO + H^+$ , 10%), 182.2239 ( $C_{10}H_3D_{14}NO + H^+$ , 2%), 183.2304 ( $C_{10}H_2D_{15}NO + H^+$ , 1%).

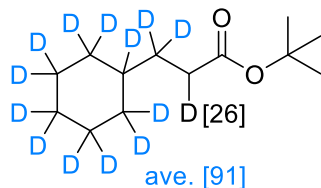

***tert*-Butyl 3-(cyclohexyl- $d_{11}$ )propanoate-3,3- $d_2$  (**3d**).** The title product was obtained with 39% yield (35.0 mg, 0.4 mmol scale) as colorless liquid.  $^1H$  NMR (400 MHz,  $CDCl_3$ )  $\delta$  2.23-2.17 (m, 1.74H), 1.68-1.64 (m, 0.59H), 1.60-1.58 (m, 0.09H), 1.48-1.46 (m, 0.53H), 1.44 (s, 9.00H);  $^{13}C$  NMR (101 MHz,  $CDCl_3$ )  $\delta$  173.95, 80.08, 33.30 (m, labeled), 32.14 (m, labeled), 29.92, 28.30, 25.68 (m, labeled).

Deuterium incorporation: 12.1 D/molecule ( $^1H$ -NMR).

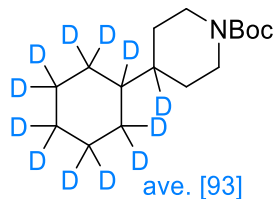

**tert-Butyl 4-(cyclohexyl-*d*<sub>11</sub>)piperidine-1-carboxylate-4-*d* (4d).** The title product was obtained with 42% yield (46.5 mg, 0.4 mmol scale) as colorless liquid. <sup>1</sup>H NMR (400 MHz, CDCl<sub>3</sub>) δ 4.11 (s, 2.00H), 2.65-2.60 (m, 2.00H), 1.67-1.61 (m, 2.48H), 1.45 (s, 9.00H), 1.18-1.09 (m, 2.04H), 0.89 (s, 0.33H); <sup>13</sup>C NMR (101 MHz, CDCl<sub>3</sub>) δ 155.12, 79.30, 44.51 (m, labeled), 41.84, 41.16 (m, labeled), 29.44, 29.33, 28.70, 25.63 (m, labeled).

Deuterium incorporation: 11.2 D/molecule (<sup>1</sup>H-NMR), 11.2 D/molecule [HRMS (ESI)].

BFX-8-96-2 #1040 RT: 7.77 AV: 1 NL: 2.32E7  
T: FTMS + p ESI Full ms [100.00-350.00]

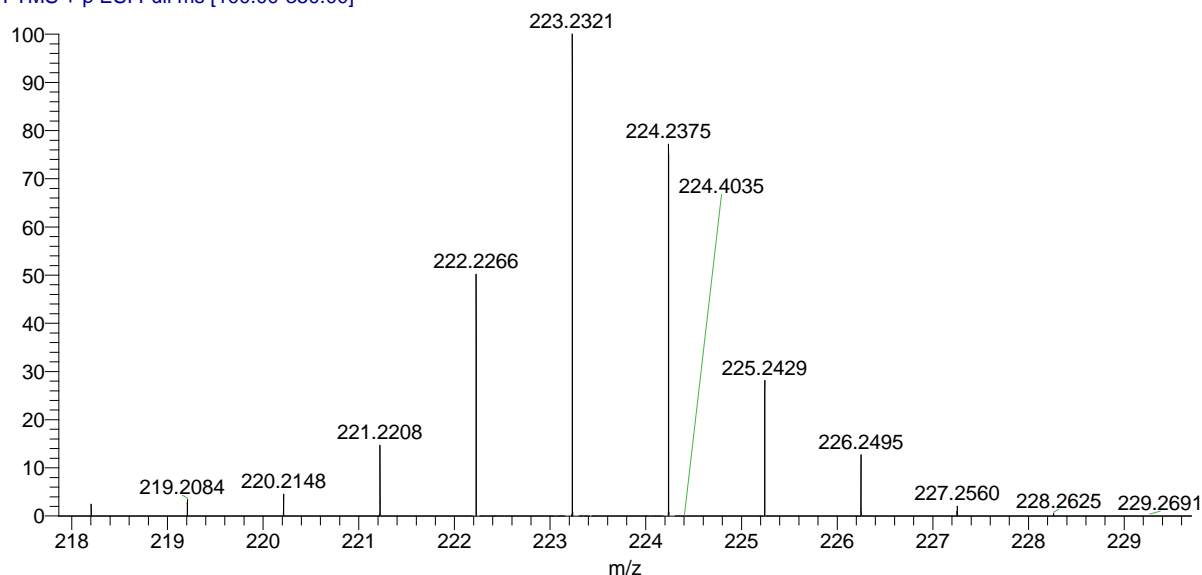

219.2084 (C<sub>16</sub>H<sub>22</sub>D<sub>7</sub>NO<sub>2</sub> – C<sub>4</sub>H<sub>7</sub> + H<sup>+</sup>, 1%), 220.2148 (C<sub>16</sub>H<sub>21</sub>D<sub>8</sub>NO<sub>2</sub> – C<sub>4</sub>H<sub>7</sub> + H<sup>+</sup>, 1%), 221.2208 (C<sub>16</sub>H<sub>20</sub>D<sub>9</sub>NO<sub>2</sub> – C<sub>4</sub>H<sub>7</sub> + H<sup>+</sup>, 5%), 222.2266 (C<sub>16</sub>H<sub>19</sub>D<sub>10</sub>NO<sub>2</sub> – C<sub>4</sub>H<sub>7</sub> + H<sup>+</sup>, 17%), 223.2321 (C<sub>16</sub>H<sub>18</sub>D<sub>11</sub>NO<sub>2</sub> – C<sub>4</sub>H<sub>7</sub> + H<sup>+</sup>, 34%), 224.2375 (C<sub>16</sub>H<sub>17</sub>D<sub>12</sub>NO<sub>2</sub> – C<sub>4</sub>H<sub>7</sub> + H<sup>+</sup>, 27%), 225.2429 (C<sub>16</sub>H<sub>16</sub>D<sub>13</sub>NO<sub>2</sub> – C<sub>4</sub>H<sub>7</sub> + H<sup>+</sup>, 9%), 226.2495 (C<sub>16</sub>H<sub>15</sub>D<sub>14</sub>NO<sub>2</sub> – C<sub>4</sub>H<sub>7</sub> + H<sup>+</sup>, 4%), 227.2560 (C<sub>16</sub>H<sub>14</sub>D<sub>15</sub>NO<sub>2</sub> – C<sub>4</sub>H<sub>7</sub> + H<sup>+</sup>, 1%).

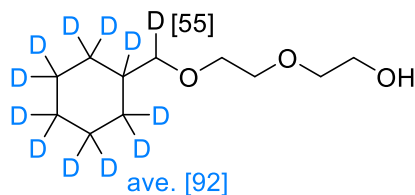

**2-(2-((Cyclohexyl-*d*<sub>11</sub>)methoxy-*d*)ethoxy)ethan-1-ol (5d).** The title product was obtained with 72% yield (46.8 mg, 0.4 mmol scale) as colorless liquid. <sup>1</sup>H NMR (400 MHz, CDCl<sub>3</sub>) δ 3.74-3.56 (m, 8.00H), 3.27-3.24 (m, 1.45H), 2.73 (s, 1.00H), 1.70-1.61 (m, 0.64H), 1.17 (s, 0.16H), 1.10 (s, 0.11H); <sup>13</sup>C NMR (101 MHz, CDCl<sub>3</sub>) δ 72.63, 72.57, 72.50, 70.62, 70.57, 70.53, 70.50, 62.03, 61.60 (m, labeled), 29.24 (m, labeled), 25.04 (m, labeled).

Deuterium incorporation: 10.6 D/molecule (<sup>1</sup>H-NMR), 11.1 D/molecule [HRMS (ESI)].

BFX-8-112-3 #691 RT: 5.16 AV: 1 NL: 6.80E6  
T: FTMS + p ESI Full ms [100.00-350.00]

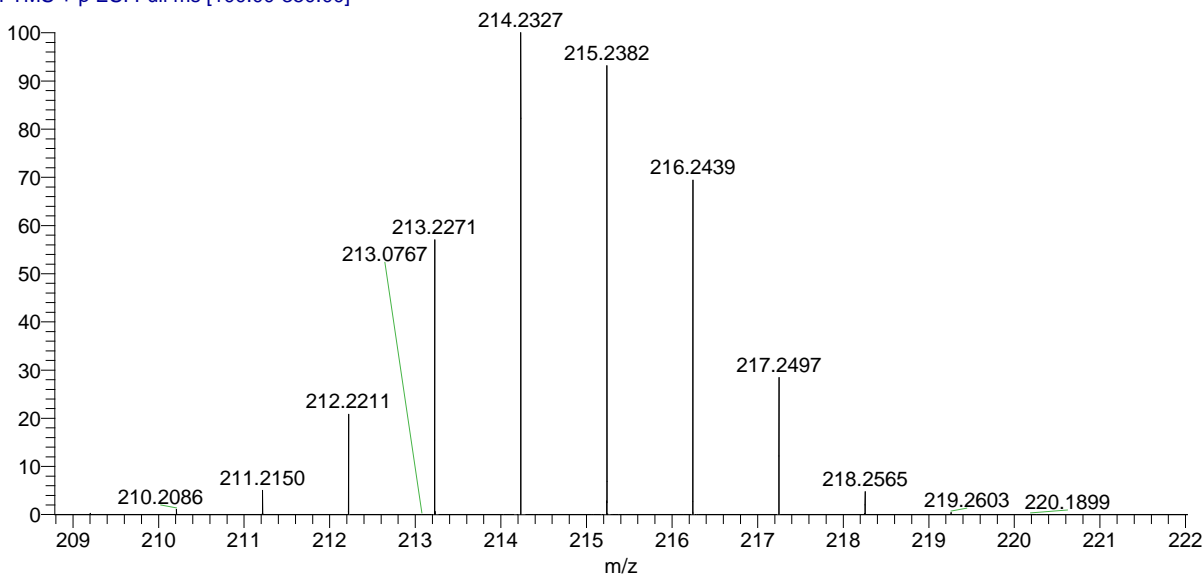

211.2150 (C<sub>11</sub>H<sub>14</sub>D<sub>8</sub>O<sub>3</sub> + H<sup>+</sup>, 2%), 212.2211 (C<sub>11</sub>H<sub>13</sub>D<sub>9</sub>O<sub>3</sub> + H<sup>+</sup>, 7%), 213.2271 (C<sub>11</sub>H<sub>12</sub>D<sub>10</sub>O<sub>3</sub> + H<sup>+</sup>, 20%), 214.2327 (C<sub>11</sub>H<sub>11</sub>D<sub>11</sub>O<sub>3</sub> + H<sup>+</sup>, 33%), 215.2382 (C<sub>11</sub>H<sub>10</sub>D<sub>12</sub>O<sub>3</sub> + H<sup>+</sup>, 29%), 216.2439 (C<sub>11</sub>H<sub>9</sub>D<sub>13</sub>O<sub>3</sub> + H<sup>+</sup>, 8%), 216.2439 (C<sub>11</sub>H<sub>8</sub>D<sub>14</sub>O<sub>3</sub> + H<sup>+</sup>, 2%).

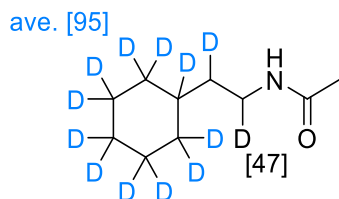

***N*-(2-(cyclohexyl-*d*<sub>11</sub>)ethyl-2-*d*)acetamide (6d).** The title product was obtained with 85% yield (61.0 mg, 0.4 mmol scale) as white solid. <sup>1</sup>H NMR (400 MHz, CDCl<sub>3</sub>) δ 5.65-5.34 (m, 0.99H), 3.27-3.15 (m, 1.53H), 2.05-1.93 (m, 3.00H), 1.64-1.57 (m, 0.35H), 1.38-1.24 (m, 1.06H), 1.14-1.07 (m, 0.21H); <sup>13</sup>C NMR (101 MHz, CDCl<sub>3</sub>) δ 170.19, 37.66, 37.60, 37.53, 37.06, 36.46 (m, labeled), 34.60 (m, labeled), 32.33 (m, labeled), 29.72 (m, labeled), 25.33 (m, labeled), 23.53.

Deuterium incorporation: 11.5 D/molecule (<sup>1</sup>H-NMR), 10.8 D/molecule [HRMS (ESI)].

BFX-8-112-5 #699 RT: 5.22 AV: 1 NL: 5.35E7  
T: FTMS + p ESI Full ms [100.00-350.00]

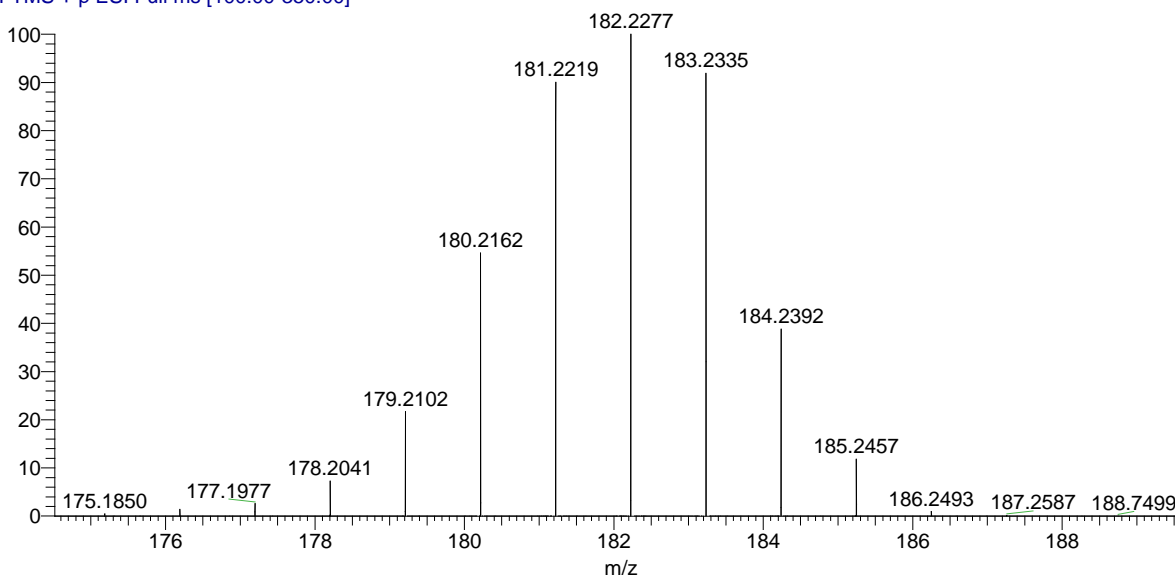

177.1977 (C<sub>10</sub>H<sub>12</sub>D<sub>7</sub>NO + H<sup>+</sup>, 1%), 178.2041 (C<sub>10</sub>H<sub>11</sub>D<sub>8</sub>NO + H<sup>+</sup>, 2%), 179.2102 (C<sub>10</sub>H<sub>10</sub>D<sub>9</sub>NO + H<sup>+</sup>, 5%), 180.2162 (C<sub>10</sub>H<sub>9</sub>D<sub>10</sub>NO + H<sup>+</sup>, 12%), 181.2219 (C<sub>10</sub>H<sub>8</sub>D<sub>11</sub>NO + H<sup>+</sup>, 21%), 182.2277 (C<sub>10</sub>H<sub>7</sub>D<sub>12</sub>NO + H<sup>+</sup>, 23%), 183.2335 (C<sub>10</sub>H<sub>6</sub>D<sub>13</sub>NO + H<sup>+</sup>, 23%), 184.2392 (C<sub>10</sub>H<sub>5</sub>D<sub>14</sub>NO + H<sup>+</sup>, 10%), 185.2457 (C<sub>10</sub>H<sub>4</sub>D<sub>15</sub>NO + H<sup>+</sup>, 3%).

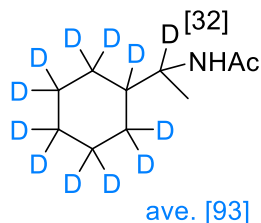

***N*-(1-(cyclohexyl-*d*<sub>11</sub>)ethyl)acetamide (7d).** The title product was obtained with 83% yield (44.9 mg, 0.3 mmol scale) as white solid. <sup>1</sup>H NMR (400 MHz, CDCl<sub>3</sub>) δ 5.84 (s, 0.05H), 5.35 (s, 0.95H), 3.87-3.80 (m, 0.68H), 2.02-1.97 (m, 3.00H), 1.84 (s, 0.56H), 1.69 (s, 0.10H), 1.61-1.59 (m, 0.10H),

1.49 (d,  $J = 7.2$  Hz, 0.20H), 1.13 (d,  $J = 6.4$  Hz, 0.20H), 1.06 (d,  $J = 6.8$  Hz, 2.61H);  $^{13}\text{C}$  NMR (101 MHz,  $\text{CDCl}_3$ ) 169.50, 49.52, 42.43 (m, labeled), 29.89, 28.23 (m, labeled), 25.31 (m, labeled), 23.80, 18.06, 17.95.

Deuterium incorporation: 10.6 D/molecule ( $^1\text{H}$ -NMR), 10.7 D/molecule [HRMS (ESI)]

bfx-xj-162-2\_221031175919 #1050 RT: 4.47 AV: 1 NL: 1.02E8  
T: FTMS + p ESI Full ms [100.00-500.00]

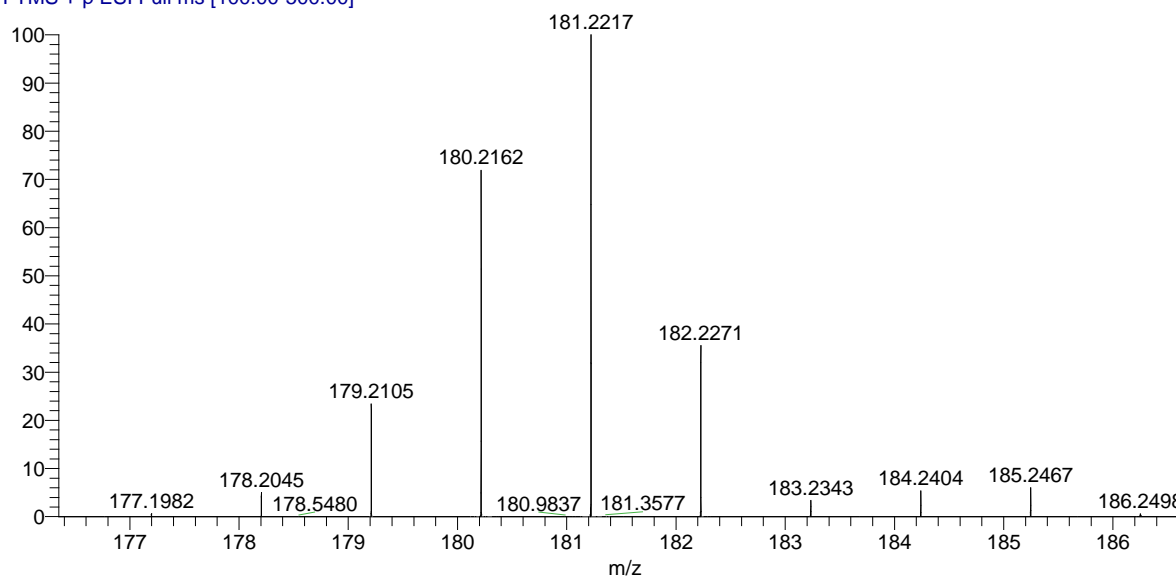

178.2045 ( $\text{C}_{10}\text{H}_{11}\text{D}_8\text{NO} + \text{H}^+$ , 2%), 179.2105 ( $\text{C}_{10}\text{H}_{10}\text{D}_9\text{NO} + \text{H}^+$ , 9%), 180.2162 ( $\text{C}_{10}\text{H}_9\text{D}_{10}\text{NO} + \text{H}^+$ , 29%), 181.2217 ( $\text{C}_{10}\text{H}_8\text{D}_{11}\text{NO} + \text{H}^+$ , 42%), 182.2271 ( $\text{C}_{10}\text{H}_7\text{D}_{12}\text{NO} + \text{H}^+$ , 14%), 183.2343 ( $\text{C}_{10}\text{H}_6\text{D}_{13}\text{NO} + \text{H}^+$ , 1%), 184.2404 ( $\text{C}_{10}\text{H}_5\text{D}_{14}\text{NO} + \text{H}^+$ , 2%).

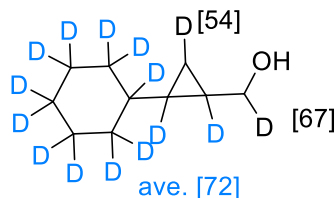

**(2-(Cyclohexyl- $d_{11}$ )cyclopropyl-1,2,3- $d_3$ )methan- $d$ -ol (8d).** The title product was obtained with 37% yield (24.4 mg, 0.4 mmol scale) as white solid.  $^1\text{H}$  NMR (400 MHz,  $\text{CDCl}_3$ )  $\delta$  3.62-3.58 (m, 0.12H), 3.49-3.44 (m, 0.26H), 3.41-3.34 (m, 0.95H), 1.69-1.49 (m, 1.72H), 1.32-1.30 (m, 0.09H), 1.26-1.24 (m, 0.06H), 1.16-0.97 (m, 0.49H), 0.87-0.75 (m, 1.33H), 0.42-0.38 (m, 0.46H), 0.34-0.30 (m, 1.00H);  $^{13}\text{C}$  NMR (101 MHz,  $\text{CDCl}_3$ )  $\delta$  68.88, 68.47 (m, labeled), 67.46, 67.09 (m,

labeled), 40.88 (m, labeled), 32.34 (m, labeled), 25.51 (m, labeled), 24.01, 20.11, 20.02, 19.93, 16.64 (m, labeled), 8.85, 8.82.

Deuterium incorporation: 10.5 D/molecule ( $^1\text{H}$ -NMR), 10.0 D/molecule [HRMS (ESI)]

bfx-8-173-3 #767 RT: 5.73 AV: 1 NL: 1.82E6  
T: FTMS + p ESI Full ms [100.00-1000.00]

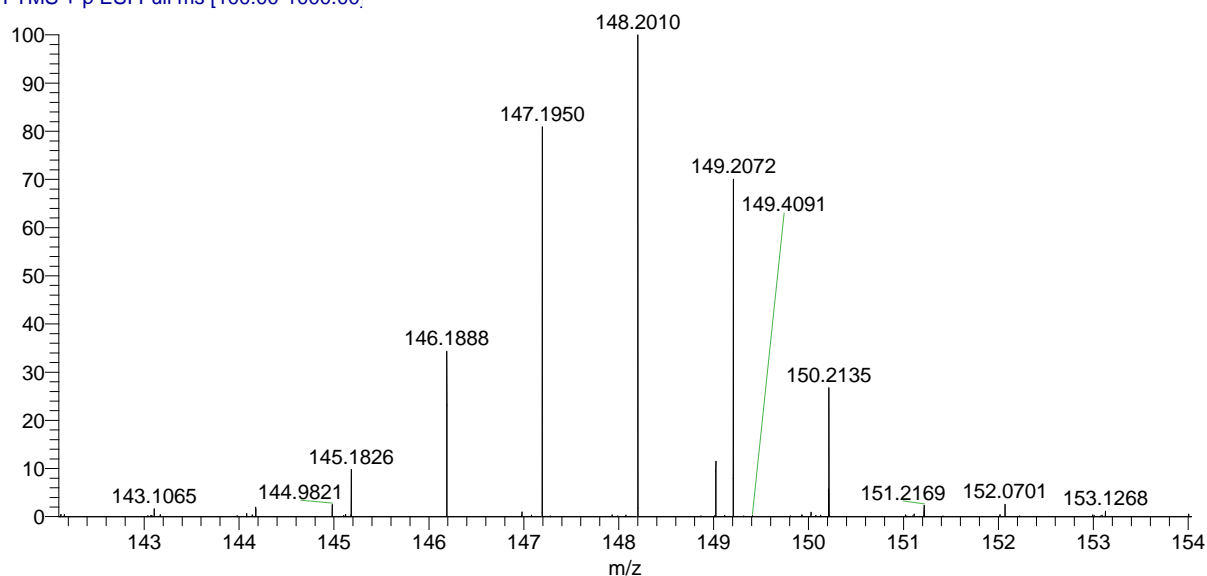

145.1826 ( $\text{C}_{10}\text{H}_{10}\text{D}_8\text{O} - \text{H}_2\text{O} + \text{H}^+$ , 7%), 146.1888 ( $\text{C}_{10}\text{H}_9\text{D}_9\text{O} - \text{H}_2\text{O} + \text{H}^+$ , 21%), 147.1950 ( $\text{C}_{10}\text{H}_8\text{D}_{10}\text{O} - \text{H}_2\text{O} + \text{H}^+$ , 39%), 148.2010 ( $\text{C}_{10}\text{H}_7\text{D}_{11}\text{O} - \text{H}_2\text{O} + \text{H}^+$ , 23%), 149.2072 ( $\text{C}_{10}\text{H}_6\text{D}_{12}\text{O} - \text{H}_2\text{O} + \text{H}^+$ , 7%).

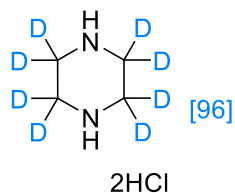

**Piperazine-2,2,3,3,5,5,6,6-*d*<sub>8</sub> (10d)**. The title product was obtained with 80% yield (30.1 mg, 0.4 mmol scale) as white solid.  $^1\text{H}$  NMR (400 MHz,  $\text{D}_2\text{O}$ )  $\delta$  2.77 (s);  $^{13}\text{C}$  NMR (101 MHz,  $\text{D}_2\text{O}$ )  $\delta$  34.68 (m, labeled).

Deuterium incorporation: 7.7 D/molecule [HRMS (ESI)]

Dyq-1-108-3 #105 RT: 0.78 AV: 1 NL: 7.72E6  
T: FTMS + p ESI Full ms [70.00-300.00]

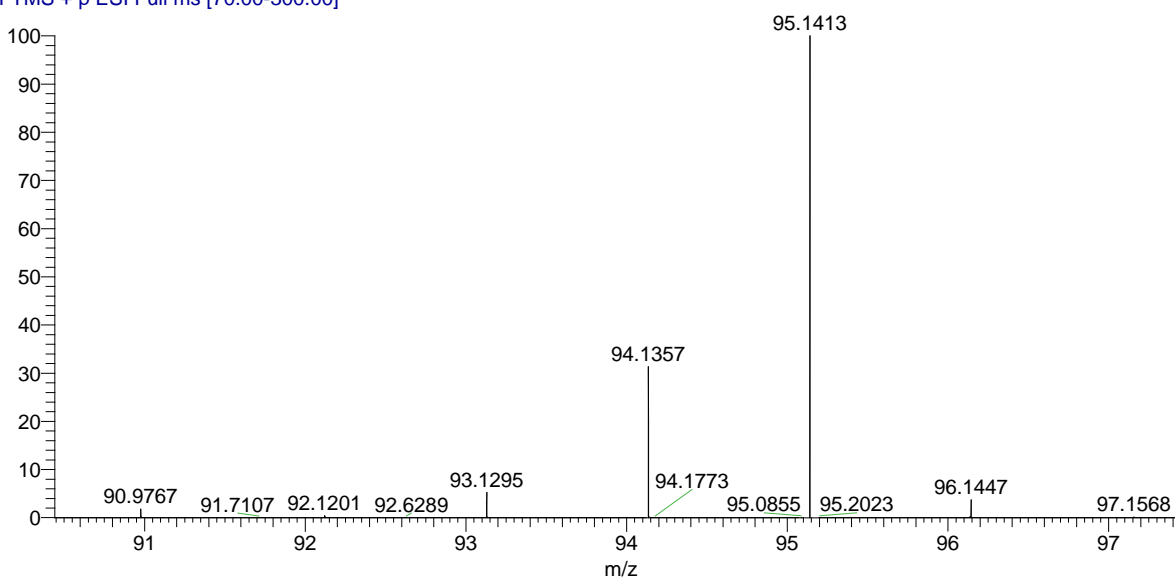

93.1295 ( $\text{C}_4\text{H}_4\text{D}_6\text{N}_2 + \text{H}^+$ , 4%), 94.1357 ( $\text{C}_4\text{H}_3\text{D}_7\text{N}_2 + \text{H}^+$ , 25%), 95.1413 ( $\text{C}_4\text{H}_2\text{D}_8\text{N}_2 + \text{H}^+$ , 71%).

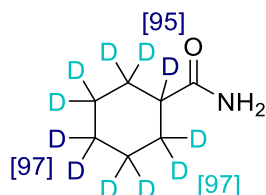

**Cyclohexane-*d*<sub>11</sub>-1-carboxamide (1f).** The title product was obtained with 85% yield (46.9 mg, 0.4 mmol scale) as white solid.  $^1\text{H}$  NMR (400 MHz,  $\text{DMSO}-d_6$ )  $\delta$  7.14 (s, 0.98H), 6.63 (s, 1.00H), 2.01 (s, 0.05H), 1.62 (s, 0.14H), 1.53 (s, 0.03H), 1.13 (s, 0.07H), 1.06 (s, 0.03H);  $^{13}\text{C}$  NMR (101 MHz,  $\text{DMSO}-d_6$ )  $\delta$  177.50, 42.93 (m, labeled), 28.11 (m, labeled), 24.24 (m, labeled).

Deuterium incorporation: 10.7 D/molecule ( $^1\text{H}$ -NMR), 10.8 D/molecule [HRMS (ESI)]



DYQ-1-100-1\_220929163316 #522 RT: 3.90 AV: 1 NL: 9.70E6  
T: FTMS + p ESI Full ms [100.00-350.00]

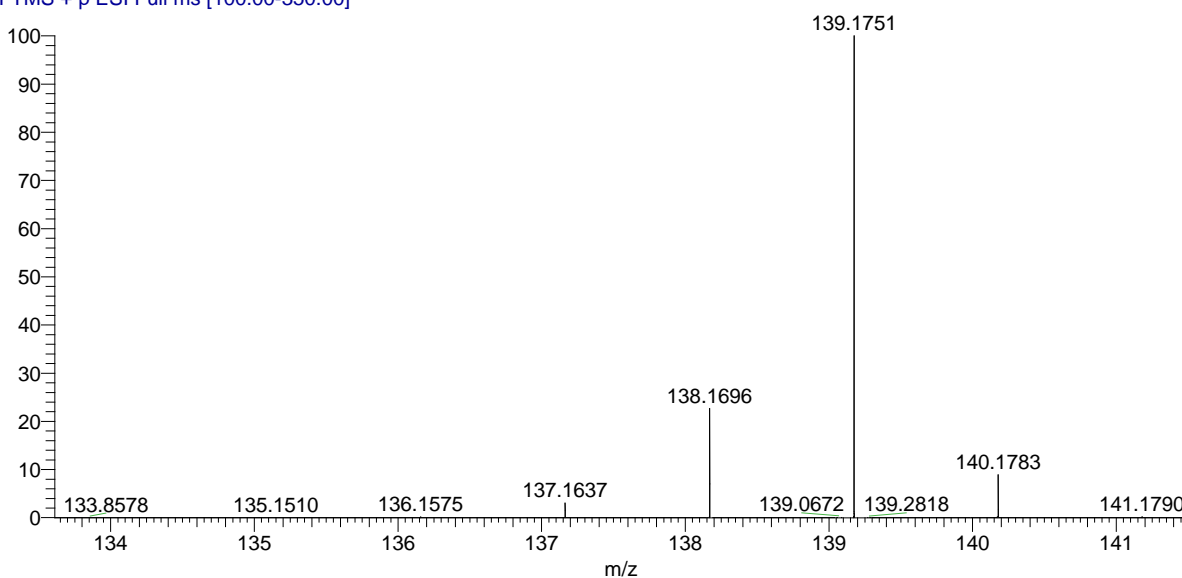

137.1637 ( $C_7H_4D_9NO + H^+$ , 2%), 138.1696 ( $C_7H_3D_{10}NO + H^+$ , 19%), 139.1751 ( $C_7H_2D_{11}NO + H^+$ , 78%).

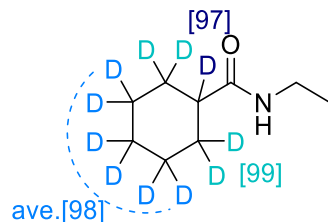

***N*-ethylcyclohexane-*d*<sub>11</sub>-1-carboxamide (2f).** The title product was obtained with 99% yield (33.2 mg, 0.2 mmol scale) as white solid.  $^1H$  NMR (400 MHz,  $CDCl_3$ )  $\delta$  5.52 (s, 0.99H), 3.30-3.23 (m, 3.00H), 2.01 (s, 0.03H), 1.79 (s, 0.02H), 1.72 (s, 0.05H), 1.60 (s, 0.02H), 1.37 (s, 0.04H), 1.19-1.18 (m, 0.05H), 1.12 (t,  $J = 7.2$  Hz, 2.99H);  $^{13}C$  NMR (101 MHz,  $CDCl_3$ )  $\delta$  176.30, 44.94 (m, labeled), 34.27, 28.76 (m, labeled), 24.59 (m, labeled), 15.08.

Deuterium incorporation: 10.8 D/molecule ( $^1H$ -NMR), 10.8 D/molecule [HRMS (ESI)].

DYQ-1-90-2\_230206124739 #606 RT: 4.52 AV: 1 NL: 1.47E8  
T: FTMS + p ESI Full ms [100.00-1000.00]

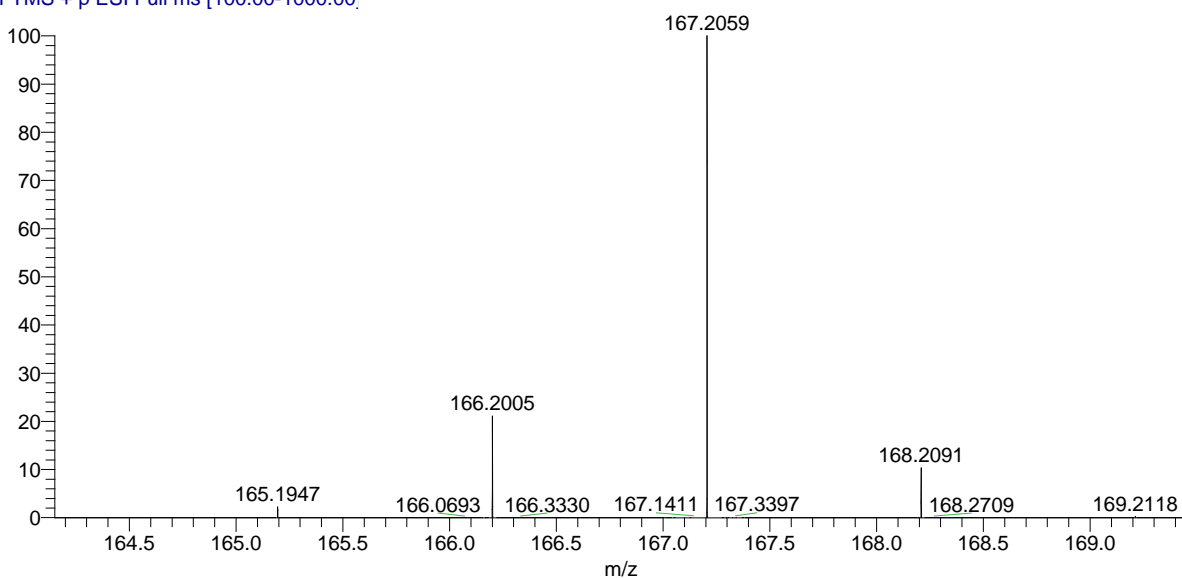

165.1947 ( $\text{C}_9\text{H}_8\text{D}_9\text{NO} + \text{H}^+$ , 2%), 166.2005 ( $\text{C}_9\text{H}_7\text{D}_{10}\text{NO} + \text{H}^+$ , 17%), 167.2059 ( $\text{C}_9\text{H}_6\text{D}_{11}\text{NO} + \text{H}^+$ , 81%).

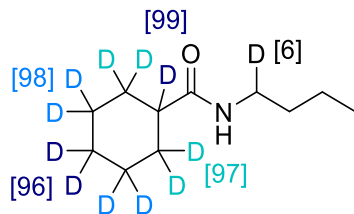

***N*-butylcyclohexane-*d*<sub>11</sub>-1-carboxamide (3f).** The title product was obtained with 99% yield (78.1 mg, 0.4 mmol scale) as white solid.  $^1\text{H}$  NMR (400 MHz,  $\text{CDCl}_3$ )  $\delta$  5.76 (s, 0.75H), 3.22-3.17 (m, 1.94H), 2.00 (s, 0.04H), 1.75 (s, 0.03H), 1.68 (s, 0.04H), 1.47-1.40 (m, 2.00H), 1.34-1.25 (m, 2.09H), 1.16 (s, 0.07H), 1.11 (s, 0.04H), 0.88 (t,  $J = 7.6$  Hz, 3.00H);  $^{13}\text{C}$  NMR (101 MHz,  $\text{CDCl}_3$ )  $\delta$  176.36, 44.90 (m, labeled), 39.11, 38.97, 31.91, 31.89, 28.86 (m, labeled), 24.73 (m, labeled), 20.19, 13.88.

Deuterium incorporation: 10.7 D/molecule ( $^1\text{H}$ -NMR), 10.7 D/molecule [HRMS (ESI)]

DYQ-1-98-3 #749 RT: 5.59 AV: 1 NL: 2.05E8  
T: FTMS + p ESI Full ms [70.00-300.00]

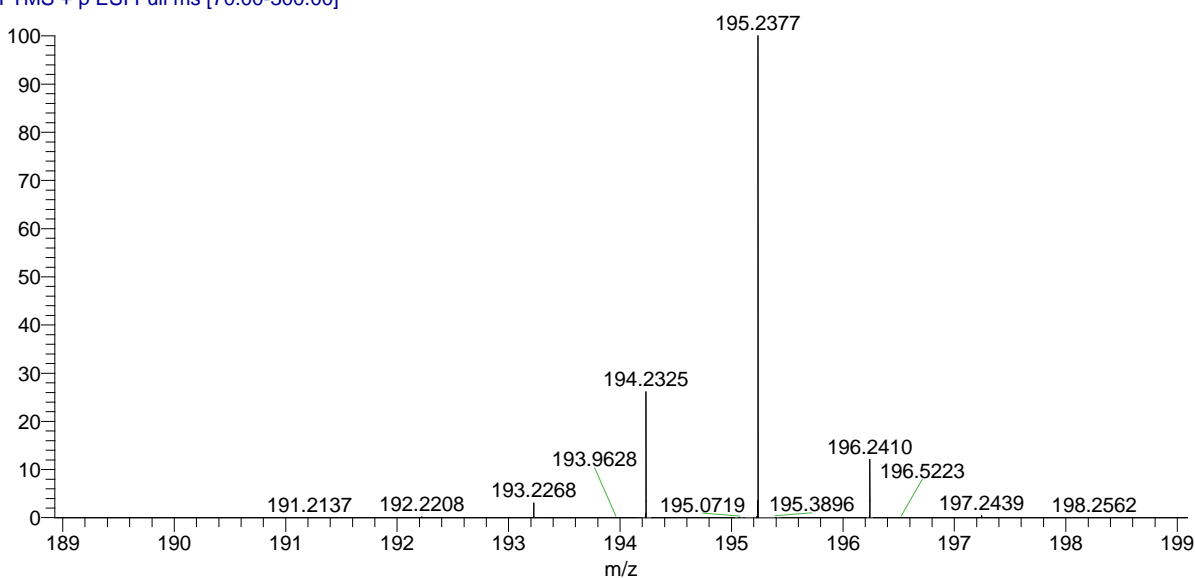

193.9628 ( $C_{11}H_{12}D_9NO + H^+$ , 2%), 194.2325 ( $C_{11}H_{11}D_{10}NO + H^+$ , 20%), 195.2377 ( $C_{11}H_{10}D_{11}NO + H^+$ , 77%).

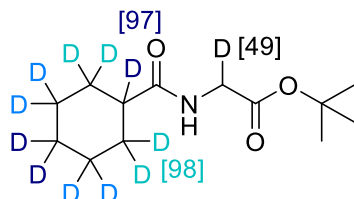

**tert-Butyl (cyclohexane-1-carbonyl- $d_{11}$ )glycinate (4f).** The title product was obtained with 82% yield (83.1 mg, 0.4 mmol scale) as white solid.  $^1H$  NMR (400 MHz,  $CDCl_3$ )  $\delta$  6.08 (s, 0.96H), 3.89-3.86 (m, 1.51H), 1.98-1.95 (m, 0.03H), 1.80 (s, 0.05H), 1.69-1.67 (m, 0.11H), 1.59-1.58 (m, 0.08H), 1.47-1.36 (m, 9.00H), 1.28 (s, 0.05H), 1.18 (s, 0.05H), 1.12 (s, 0.02H);  $^{13}C$  NMR (101 MHz,  $CDCl_3$ )  $\delta$  176.35, 169.60, 82.41, 44.77, 42.05, 41.77 (m, labeled), 28.72 (m, labeled), 28.22, 24.68 (m, labeled).

Deuterium incorporation: 11.1 D/molecule ( $^1H$ -NMR), 11.1 D/molecule [HRMS (ESI)].

Dyq-1-119-3 #719 RT: 5.37 AV: 1 NL: 1.00E8  
T: FTMS + p ESI Full ms [100.00-350.00]

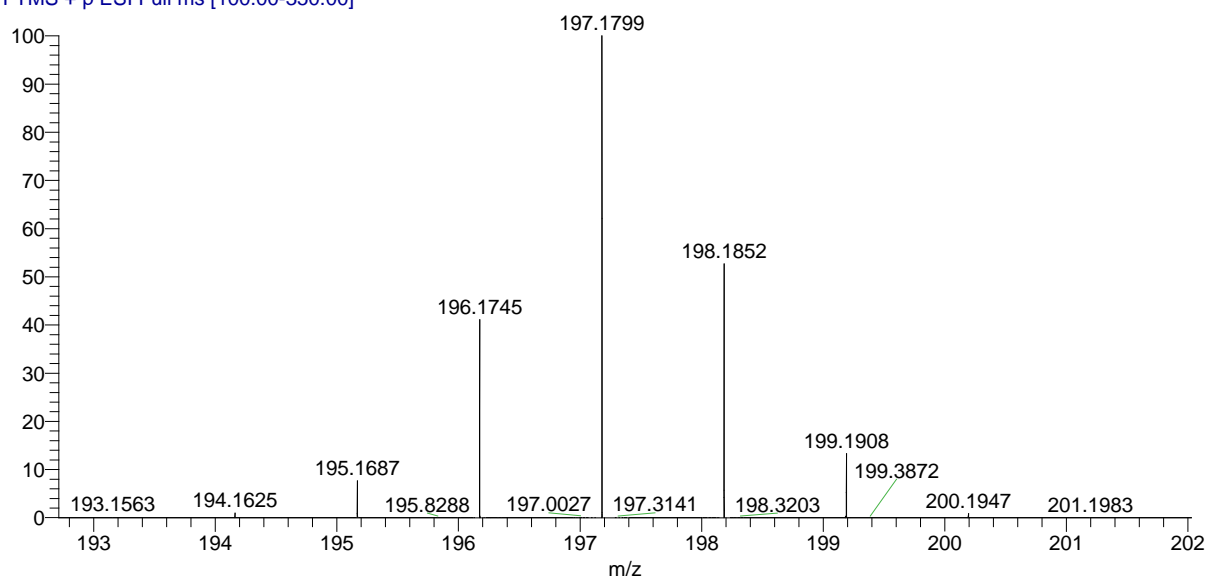

195.1687 ( $C_{13}H_{14}D_9NO_3 - C_4H_8 + H^+$ , 4%), 196.1745 ( $C_{13}H_{13}D_{10}NO_3 - C_4H_8 + H^+$ , 19%), 197.1799 ( $C_{13}H_{12}D_{11}NO_3 - C_4H_8 + H^+$ , 47%), 198.1852 ( $C_{13}H_{11}D_{12}NO_3 - C_4H_8 + H^+$ , 24%), 199.1908 ( $C_{13}H_{10}D_{13}NO_3 - C_4H_8 + H^+$ , 6%).

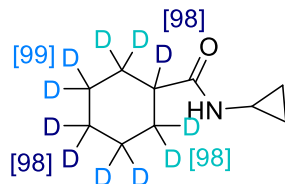

***N*-cyclopropylcyclohexane-*d*<sub>11</sub>-1-carboxamide (5f).** The title product was obtained with 99% yield (70.9 mg, 0.4 mmol scale) as white solid. <sup>1</sup>H NMR (400 MHz, CDCl<sub>3</sub>) δ 5.92 (s, 1.00H), 2.70-2.56 (m, 0.99H), 2.23 (s, 0.02H), 1.97 (s, 0.03H), 1.73 (s, 0.03H), 1.68 (s, 0.04H), 1.33 (s, 0.05H), 1.14 (s, 0.03H), 1.11 (s, 0.02H), 0.73-0.68 (m, 1.99H), 0.46-0.42 (m, 2.00H); <sup>13</sup>C NMR (101 MHz, CDCl<sub>3</sub>) δ 177.89, 44.61 (m, labeled), 28.57 (m, labeled), 24.56 (m, labeled), 22.62, 6.69.

Deuterium incorporation: 10.8 D/molecule (<sup>1</sup>H-NMR), 10.7 D/molecule [HRMS (ESI)].

DYQ-1-115-2 #535-696 RT: 3.99-5.19 AV: 162 NL: 8.30E6  
T: FTMS + p ESI Full ms [100.00-350.00]

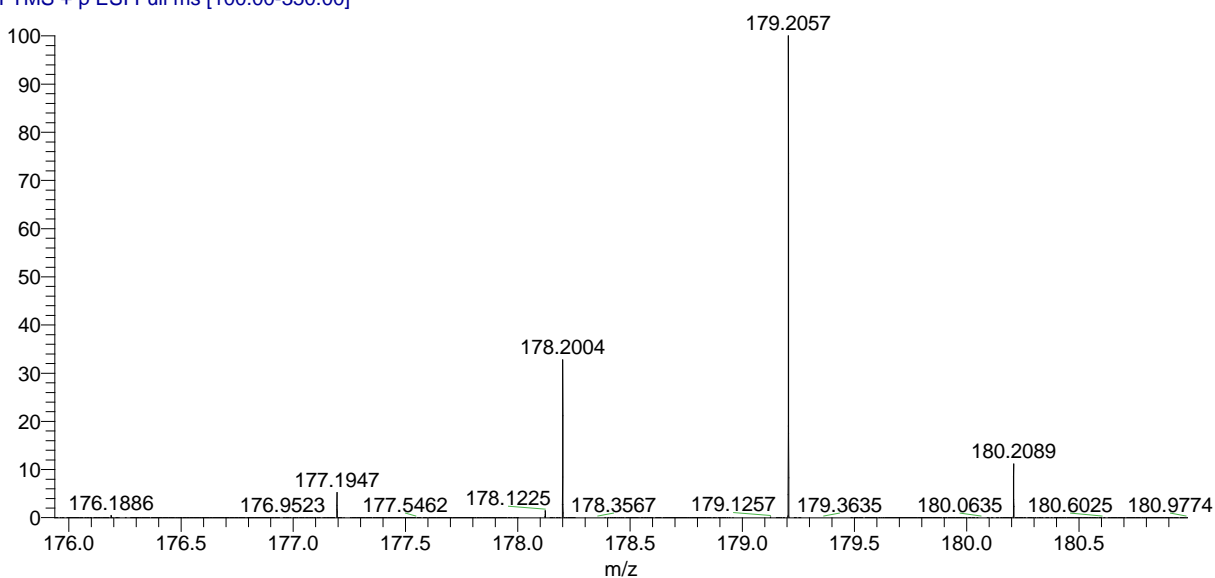

177.1947 ( $\text{C}_{10}\text{H}_8\text{D}_9\text{NO} + \text{H}^+$ , 3%), 178.2004 ( $\text{C}_{10}\text{H}_7\text{D}_{10}\text{NO} + \text{H}^+$ , 23%), 179.2057 ( $\text{C}_{10}\text{H}_7\text{D}_{10}\text{NO} + \text{H}^+$ , 73%).

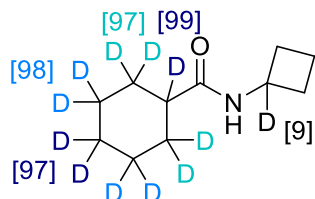

***N*-cyclobutylcyclohexane-*d*<sub>11</sub>-1-carboxamide (6f).** The title product was obtained with 95% yield (73.0 mg, 0.4 mmol scale) as white solid.  $^1\text{H}$  NMR (400 MHz,  $\text{CDCl}_3$ )  $\delta$  5.77 (d,  $J = 7.2$  Hz, 0.74H), 4.43-4.32 (m, 0.91H), 2.34-2.27 (m, 2.00H), 2.00-1.97 (m, 0.06H), 1.86-1.76 (m, 2.05H), 1.72-1.62 (m, 2.05H), 1.35 (s, 0.07H), 1.17 (s, 0.05H), 1.13 (m, 0.02H);  $^{13}\text{C}$  NMR (101 MHz,  $\text{CDCl}_3$ )  $\delta$  175.44, 44.57, 44.44, 31.51, 31.49, 28.67 (m, labeled), 24.65 (m, labeled), 15.16.

Deuterium incorporation: 10.7 D/molecule ( $^1\text{H}$ -NMR), 10.6 D/molecule [HRMS (ESI)]

DYQ-1-95-4 #726 RT: 5.42 AV: 1 NL: 1.71E8  
T: FTMS + p ESI Full ms [70.00-300.00]

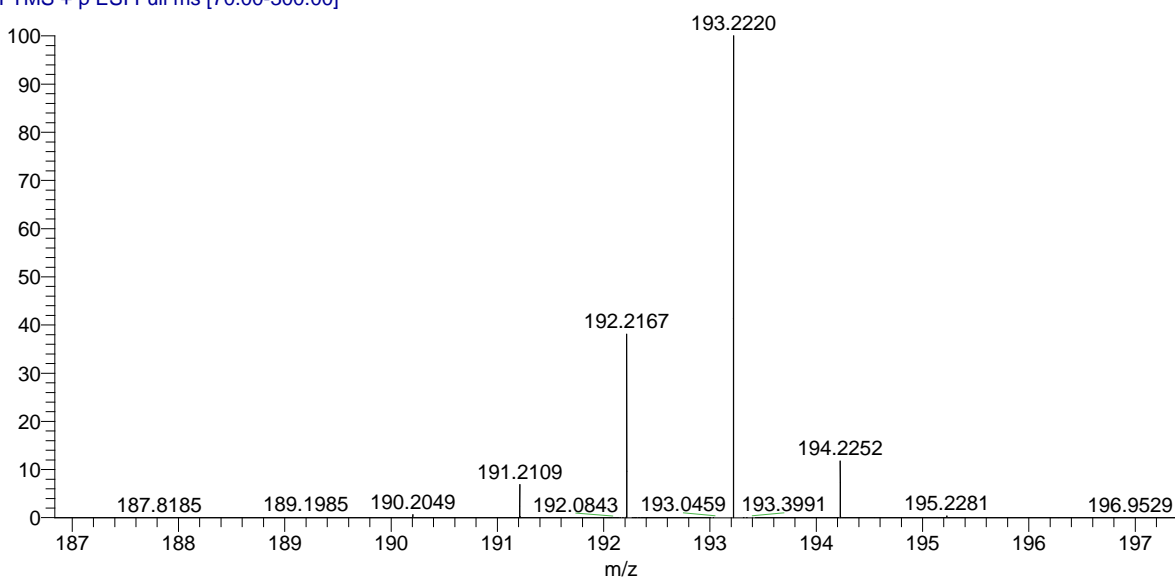

191.2109 ( $C_{11}H_{10}D_9NO + H^+$ , 5%), 192.2167 ( $C_{11}H_9D_{10}NO + H^+$ , 26%), 193.2220 ( $C_{11}H_8D_{11}NO + H^+$ , 68%).

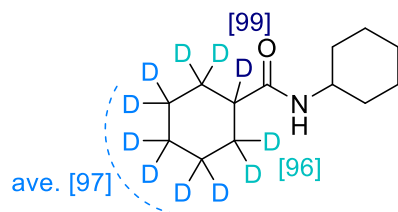

***N*-cyclohexylcyclohexane-*d*<sub>11</sub>-1-carboxamide (7f).** The title product was obtained with 87% yield (76.6 mg, 0.4 mmol scale) as white solid.  $^1H$  NMR (400 MHz,  $CDCl_3$ )  $\delta$  5.38 (d,  $J = 8.4$  Hz, 0.98H), 3.78-3.69 (m, 0.98H), 2.21 (t,  $J = 8.0$  Hz, 0.01H), 2.02-1.94 (m, 0.09H), 1.89-1.85 (m, 1.98H), 1.77 (s, 0.07H), 1.70-1.65 (m, 2.04H), 1.62-1.56 (m, 1.00H), 1.40-1.29 (m, 2.09H), 1.19-1.03 (m, 3.06H);  $^{13}C$  NMR (101 MHz,  $CDCl_3$ )  $\delta$  175.39, 47.84, 45.11 (m, labeled), 33.43, 28.92 (m, labeled), 25.75, 25.06, 24.50 (m, labeled).

Deuterium incorporation: 10.4 D/molecule ( $^1H$ -NMR), 10.4 D/molecule [HRMS (ESI)].

DYQ-1-93-1 #789 RT: 5.89 AV: 1 NL: 5.38E7  
T: FTMS + p ESI Full ms [70.00-300.00]

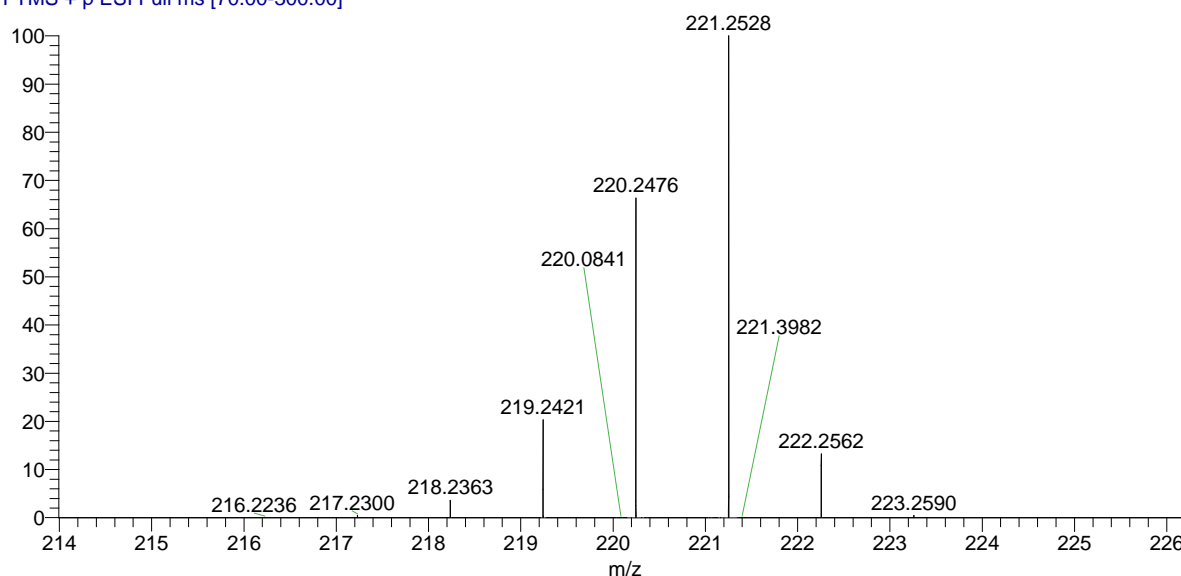

218.2363 ( $\text{C}_{13}\text{H}_{15}\text{D}_8\text{NO} + \text{H}^+$ , 2%), 219.2421 ( $\text{C}_{13}\text{H}_{14}\text{D}_9\text{NO} + \text{H}^+$ , 11%), 220.0841 ( $\text{C}_{13}\text{H}_{13}\text{D}_{10}\text{NO} + \text{H}^+$ , 34%), 221.3982 ( $\text{C}_{13}\text{H}_{12}\text{D}_{11}\text{NO} + \text{H}^+$ , 53%).

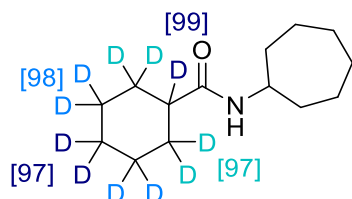

***N*-cycloheptylcyclohexane-*d*<sub>11</sub>-1-carboxamide (8f).** The title product was obtained with 99% yield (96.2 mg, 0.4 mmol scale) as white solid.  $^1\text{H}$  NMR (400 MHz,  $\text{CDCl}_3$ )  $\delta$  5.62 (d,  $J = 8.4$  Hz, 0.25H), 3.93-3.84 (m, 1.00H), 1.95 (s, 0.05H), 1.87-1.81 (m, 2.00H), 1.72 (s, 0.02H), 1.66 (s, 0.05H), 1.57-1.32 (m, 10.06H), 1.14 (s, 0.06H), 1.10 (s, 0.02H);  $^{13}\text{C}$  NMR (101 MHz,  $\text{CDCl}_3$ )  $\delta$  175.06, 174.98, 50.01, 49.90, 44.84 (m, labeled), 35.23, 35.19, 28.80 (m, labeled), 28.08, 24.63 (m, labeled), 24.23.

Deuterium incorporation: 10.7 D/molecule ( $^1\text{H}$ -NMR), 10.7 D/molecule [HRMS (ESI)].

DYQ-1-111-6 #696-964 RT: 5.20-7.18 AV: 269 NL: 1.33E7  
T: FTMS + p ESI Full ms [100.00-350.00]

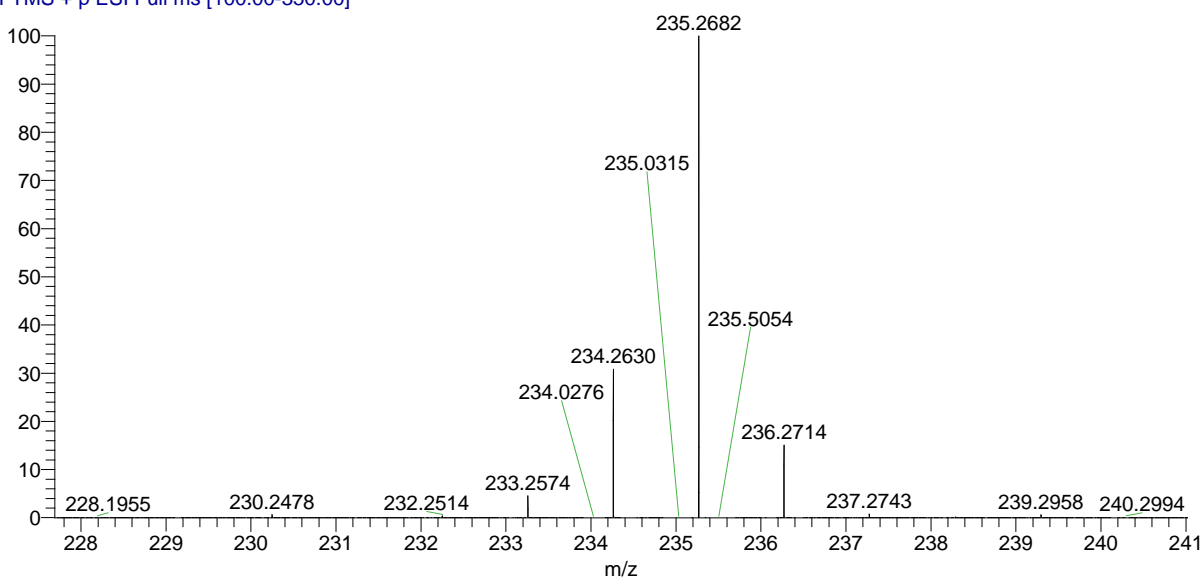

233.2574 ( $\text{C}_{14}\text{H}_{16}\text{D}_9\text{NO} + \text{H}^+$ , 3%), 234.2630 ( $\text{C}_{14}\text{H}_{15}\text{D}_{10}\text{NO} + \text{H}^+$ , 23%), 234.2682 ( $\text{C}_{14}\text{H}_{14}\text{D}_{11}\text{NO} + \text{H}^+$ , 74%).

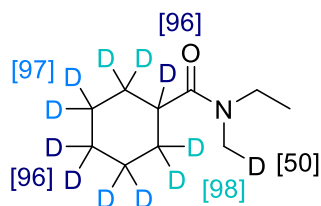

***N*-ethyl-*N*-(methyl-*d*)cyclohexane-1-carboxamide-*d*<sub>11</sub> (9f).** The title product was obtained with 83% yield (60.0 mg, 0.4 mmol scale) as white solid.  $^1\text{H}$  NMR (400 MHz,  $\text{CDCl}_3$ )  $\delta$  3.43-3.33 (m, 2.00H), 3.00 (s, 1.20H), 2.90 (s, 1.30H), 2.41 (s, 0.04H), 1.75 (s, 0.04H), 1.64 (s, 0.06H), 1.51 (s, 0.05H), 1.46 (s, 0.05H), 1.18 (t,  $J = 7.0$  Hz, 1.50H), 1.15 (s, 0.05H), 1.13 (s, 0.04H), 1.08 (t,  $J = 7.2$  Hz, 1.31H), 1.02 (t,  $J = 7.2$  Hz, 0.06H), 0.88 (t,  $J = 6.6$  Hz, 0.13H);  $^{13}\text{C}$  NMR (101 MHz,  $\text{CDCl}_3$ )  $\delta$  44.38, 42.48, 34.63, 33.07, 14.40, 12.53.

Deuterium incorporation: 11.2 D/molecule ( $^1\text{H}$ -NMR), 10.7 D/molecule [HRMS (ESI)].



DTQ-1-141-4 #1168 RT: 4.97 AV: 1 NL: 1.76E8  
T: FTMS + p ESI Full ms [50.00-500.00]

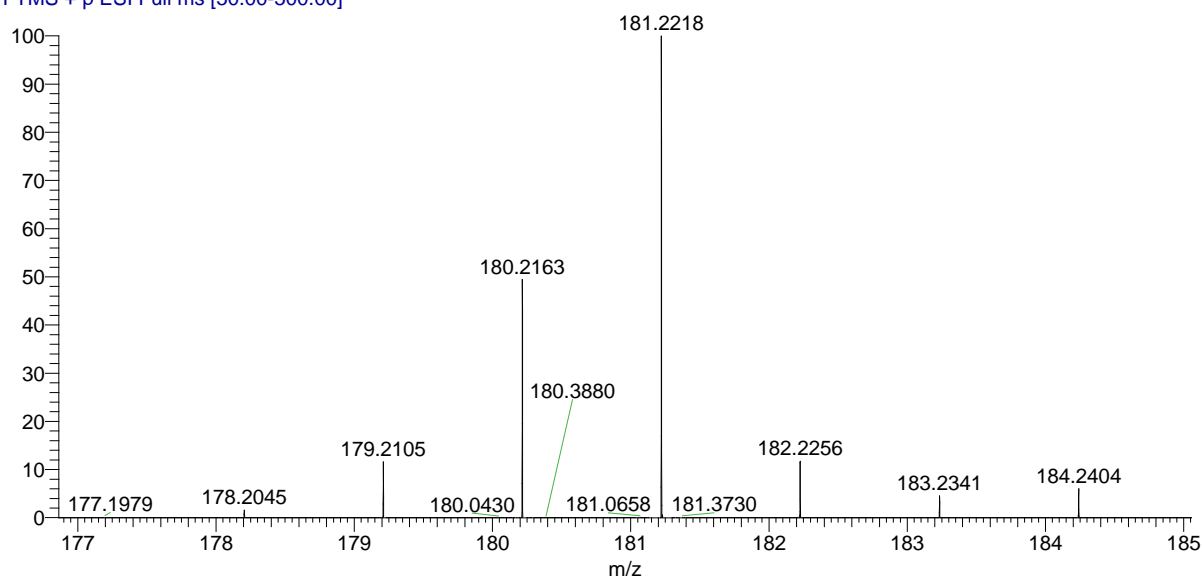

178.2045 ( $C_{10}H_{11}D_8NO + H^+$ , 1%), 179.2105 ( $C_{10}H_{10}D_9NO + H^+$ , 7%), 180.2163 ( $C_{10}H_9D_{10}NO + H^+$ , 30%), 181.2218 ( $C_{10}H_8D_{11}NO + H^+$ , 62%), 183.2341 ( $C_{10}H_7D_{12}NO + H^+$ , 3%), 184.2404 ( $C_{10}H_{11}D_8NO + H^+$ , 4%).

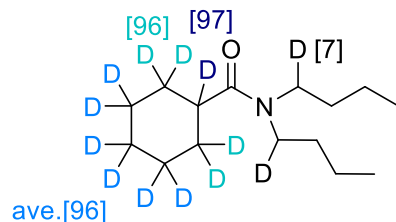

***N,N*-dibutylcyclohexane-1-carboxamide-*d*<sub>11</sub> (10f).** The title product was obtained with 76% yield (76.2 mg, 0.4 mmol scale) as white solid.  $^1H$  NMR (400 MHz,  $CDCl_3$ )  $\delta$  3.25 (t,  $J = 7.6$  Hz, 1.92H), 3.18 (t,  $J = 7.6$  Hz, 1.94H), 2.34 (s, 0.03H), 1.99 (s, 0.01H), 1.70 (s, 0.04H), 1.63-1.59 (m, 0.10H), 1.54-1.40 (m, 4.00H), 1.35-1.20 (m, 4.21H), 1.17 (s, 0.10H), 0.92 (t,  $J = 7.2$  Hz, 3.00H), 0.88 (t,  $J = 7.2$  Hz, 3.00H);  $^{13}C$  NMR (101 MHz,  $CDCl_3$ )  $\delta$  175.95, 47.34, 45.53, 39.97 (m, labeled), 31.81, 29.95, 28.21 (m, labeled), 24.61 (m, labeled), 20.18, 20.03, 13.87, 13.82.

Deuterium incorporation: 10.6 D/molecule ( $^1H$ -NMR), 10.7 D/molecule [HRMS (ESI)]

DYQ-1-98-4 #935 RT: 6.98 AV: 1 NL: 1.61E8  
T: FTMS + p ESI Full ms [70.00-300.00]

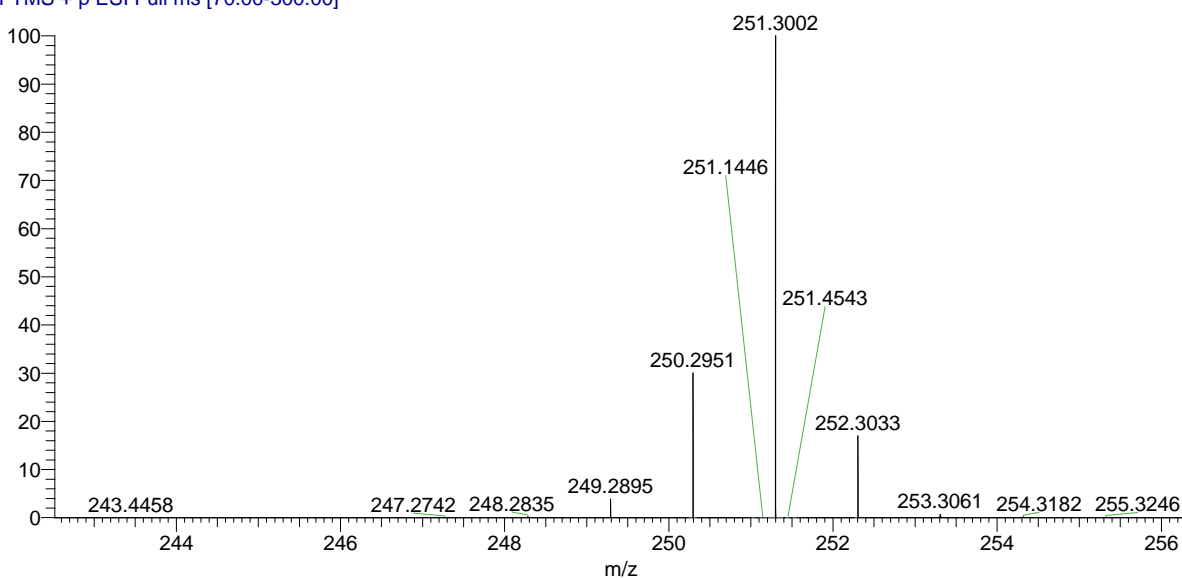

249.2895 ( $\text{C}_{15}\text{H}_{20}\text{D}_9\text{NO} + \text{H}^+$ , 3%), 250.2951 ( $\text{C}_{15}\text{H}_{19}\text{D}_{10}\text{NO} + \text{H}^+$ , 22%), 251.3002 ( $\text{C}_{15}\text{H}_{18}\text{D}_{11}\text{NO} + \text{H}^+$ , 75%).

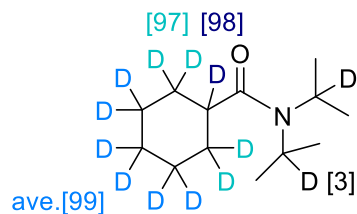

***N,N*-diisopropylcyclohexane-1-carboxamide-*d*<sub>11</sub> (11f).** The title product was obtained with 84% yield (74.9 mg, 0.4 mmol scale) as white solid.  $^1\text{H}$  NMR (400 MHz,  $\text{CDCl}_3$ )  $\delta$  3.93-3.54 (m, 1.94H), 2.22-2.18 (m, 0.02H), 1.98 (s, 0.02H), 1.70 (s, 0.02H), 1.60 (s, 0.04H), 1.45 (s, 0.09H), 1.31-1.17 (m, 12.00H), 1.03-1.01 (s, 0.03H);  $^{13}\text{C}$  NMR (101 MHz,  $\text{CDCl}_3$ )  $\delta$  175.58, 47.49, 45.50, 41.81 (m, labeled), 29.82, 28.61 (m, labeled), 24.88 (m, labeled), 21.63, 20.88.

Deuterium incorporation: 10.8 D/molecule ( $^1\text{H}$ -NMR), 10.8 D/molecule [HRMS (ESI)]

Dyq-1-99-2 #807 RT: 6.02 AV: 1 NL: 3.98E8  
T: FTMS + p ESI Full ms [70.00-300.00]

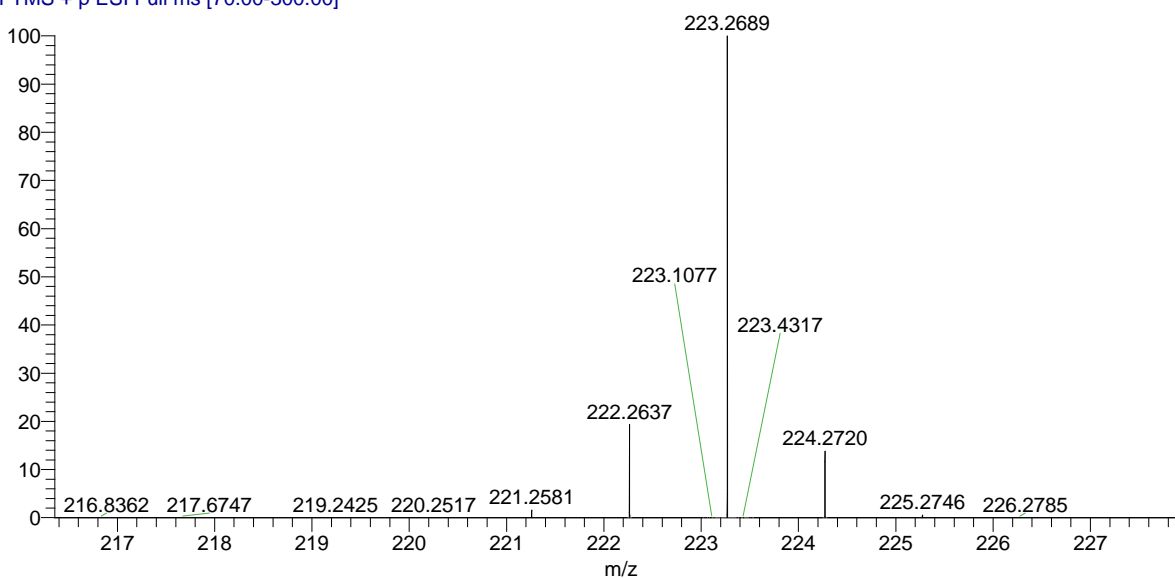

221.2581 ( $\text{C}_{13}\text{H}_{16}\text{D}_9\text{NO} + \text{H}^+$ , 1%), 222.2637 ( $\text{C}_{13}\text{H}_{15}\text{D}_{10}\text{NO} + \text{H}^+$ , 16%), 223.2689 ( $\text{C}_{13}\text{H}_{14}\text{D}_{11}\text{NO} + \text{H}^+$ , 82%).

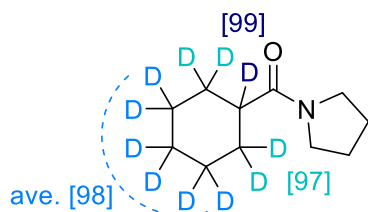

**(Cyclohexyl- $d_{11}$ )(pyrrolidin-1-yl)methanone (12f).** The title product was obtained with 99% yield (80.6 mg, 0.4 mmol scale) as white solid.  $^1\text{H}$  NMR (400 MHz,  $\text{CDCl}_3$ )  $\delta$  3.62 (t,  $J = 7.0$  Hz, 0.18H), 3.41 (q,  $J = 7.2$  Hz, 3.65H), 3.28 (t,  $J = 6.6$  Hz, 0.14H), 1.96-1.77 (m, 4.0H), 1.70 (s, 0.05H), 1.65 (s, 0.04H), 1.58 (s, 0.02H), 1.44 (s, 0.06H), 1.16 (s, 0.06H);  $^{13}\text{C}$  NMR (101 MHz,  $\text{CDCl}_3$ )  $\delta$  174.98, 46.35, 45.71, 42.25 (m, labeled), 27.91 (m, labeled), 26.26, 24.78 (m, labeled), 24.38.

Deuterium incorporation: 10.8 D/molecule ( $^1\text{H}$ -NMR), 10.7 D/molecule [HRMS (ESI)].

DYQ-1-110-2 #669 RT: 4.99 AV: 1 NL: 7.32E7  
T: FTMS + p ESI Full ms [100.00-350.00]

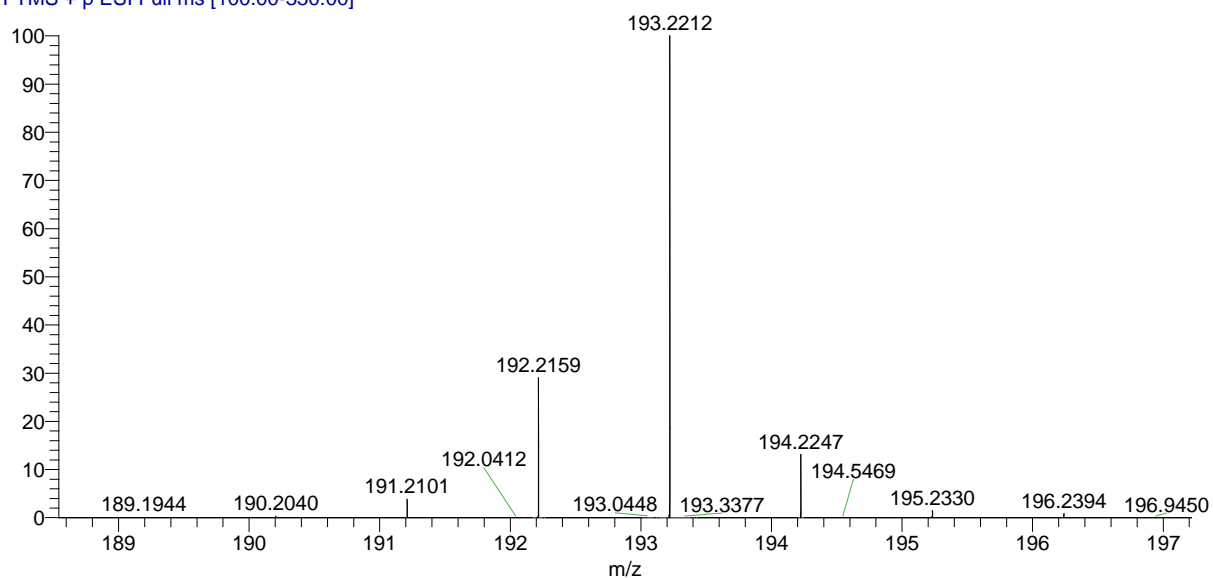

191.2101 ( $C_{11}H_{10}D_9NO + H^+$ , 3%), 192.2159 ( $C_{11}H_9D_{10}NO + H^+$ , 21%), 193.2212 ( $C_{11}H_8D_{11}NO + H^+$ , 75%).

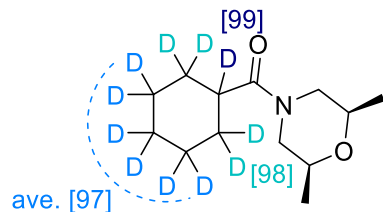

**(Cyclohexyl- $d_{11}$ )((2*S*,6*R*)-2,6-dimethylmorpholino)methanone (13f).** The title product was obtained with 75% yield (70.5 mg, 0.4 mmol scale) as white solid.  $^1H$  NMR (400 MHz,  $CDCl_3$ )  $\delta$  4.45 (d,  $J = 13.2$  Hz, 0.99H), 3.64 (d,  $J = 13.6$  Hz, 1.00H), 3.55-3.45 (m, 2.00H), 2.76 (dd,  $J = 10.6, 13.0$  Hz, 1.00H), 2.26 (dd,  $J = 10.8, 12.8$  Hz, 0.97H), 1.92 (s, 0.08H), 1.73 (s, 0.04H), 1.62 (s, 0.08H), 1.49 (s, 0.02H), 1.25-1.16 (m, 6.08H);  $^{13}C$  NMR (101 MHz,  $CDCl_3$ )  $\delta$  174.68, 72.17, 72.10, 51.24, 47.13, 39.63 (m, labeled), 28.50 (m, labeled), 24.74 (m, labeled), 18.92.

Deuterium incorporation: 10.7 D/molecule ( $^1H$ -NMR), 10.8 D/molecule [HRMS (ESI)].

DYQ-1-117-2 #693 RT: 5.17 AV: 1 NL: 9.63E7  
T: FTMS + p ESI Full ms [100.00-350.00]

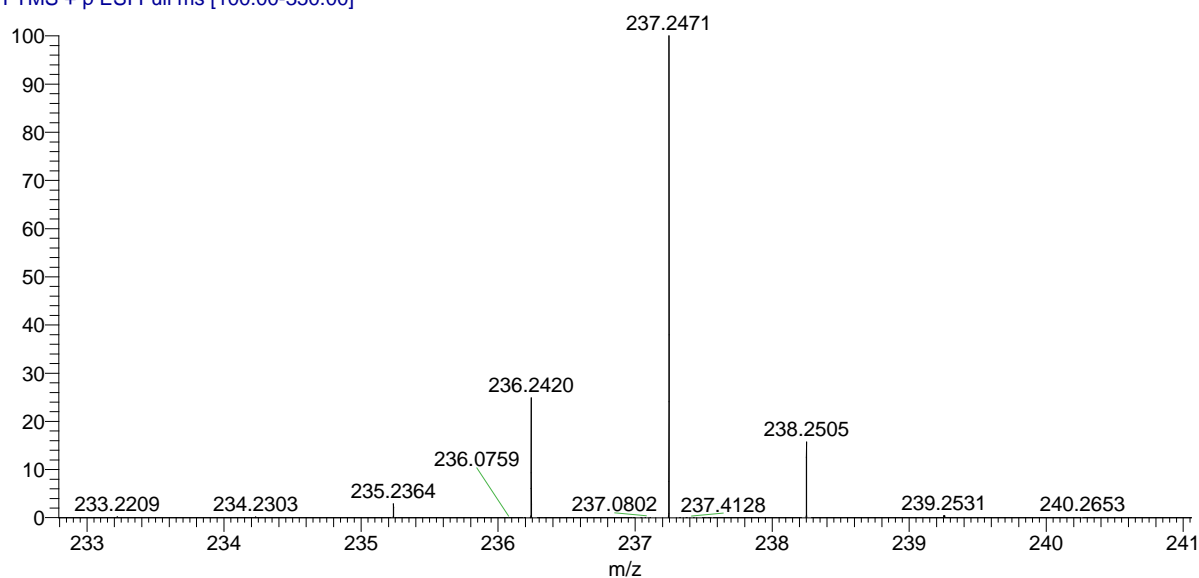

235.2364 ( $\text{C}_{13}\text{H}_{14}\text{D}_9\text{NO}_2 + \text{H}^+$ , 2%), 236.2420 ( $\text{C}_{13}\text{H}_{13}\text{D}_{10}\text{NO}_2 + \text{H}^+$ , 19%), 237.2471 ( $\text{C}_{13}\text{H}_{12}\text{D}_{11}\text{NO}_2 + \text{H}^+$ , 78%).

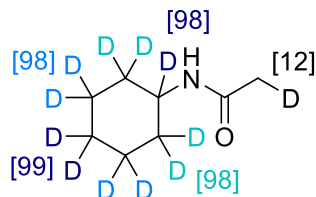

***N*-(cyclohexyl-*d*<sub>11</sub>)acetamide (14f).** The title product was obtained with 78% yield (47.2 mg, 0.4 mmol scale) as white solid. <sup>1</sup>H NMR (400 MHz, CDCl<sub>3</sub>) δ 5.47 (s, 1.00H), 3.71 (d, *J* = 8.9 Hz, 0.02H), 2.02-1.92 (m, 2.88H), 1.85 (s, 0.03H), 1.63 (s, 0.03H), 1.55 (s, 0.01H), 1.29 (s, 0.04H), 1.08 (s, 0.02H), 1.05 (s, 0.04H); <sup>13</sup>C NMR (101 MHz, CDCl<sub>3</sub>) δ 169.31, 47.72 (m, labeled), 32.16 (m, labeled), 23.84 (m, labeled), 23.77.

Deuterium incorporation: 10.9 D/molecule (<sup>1</sup>H-NMR), 11.1 D/molecule [HRMS (ESI)].

Dyq-1-102-1 #548 RT: 4.09 AV: 1 NL: 4.21E7  
T: FTMS + p ESI Full ms [70.00-300.00]

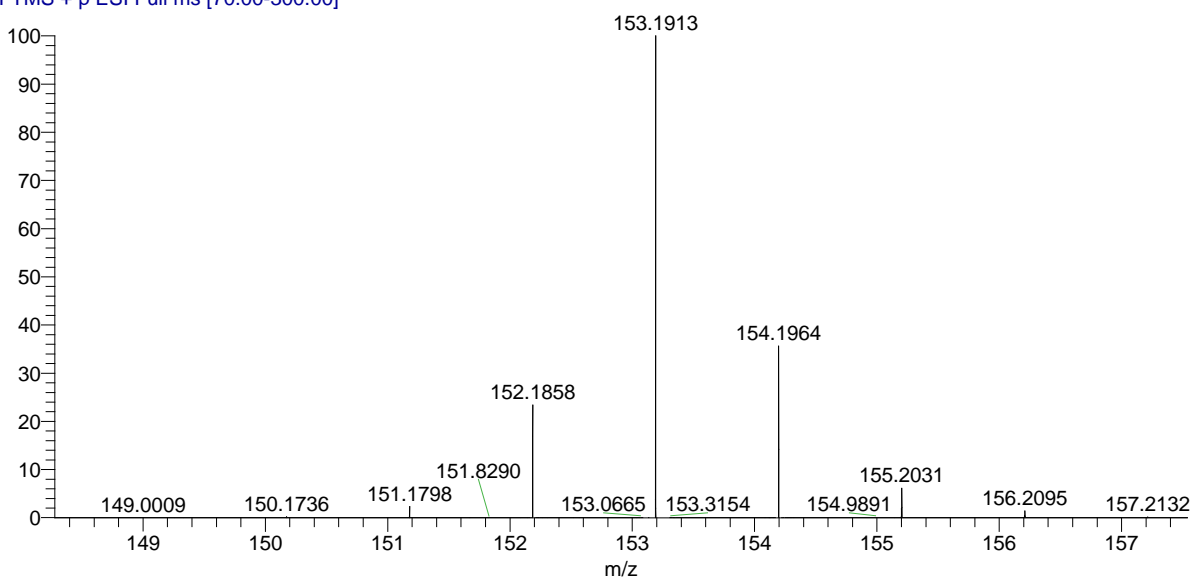

151.1798 ( $\text{C}_8\text{H}_6\text{D}_9\text{NO} + \text{H}^+$ , 1%), 152.1858 ( $\text{C}_8\text{H}_5\text{D}_{10}\text{NO} + \text{H}^+$ , 13%), 153.1913 ( $\text{C}_8\text{H}_4\text{D}_{11}\text{NO} + \text{H}^+$ , 62%), 154.1964 ( $\text{C}_8\text{H}_3\text{D}_{12}\text{NO} + \text{H}^+$ , 19%), 155.2031 ( $\text{C}_8\text{H}_2\text{D}_{13}\text{NO} + \text{H}^+$ , 3%), 156.2095 ( $\text{C}_8\text{H}_1\text{D}_{14}\text{NO} + \text{H}^+$ , 1%).

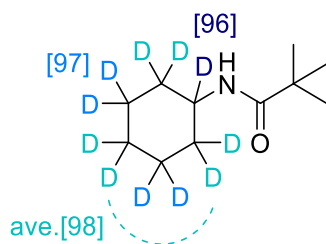

***N*-(cyclohexyl-*d*<sub>11</sub>)pivalamide (15f).** The title product was obtained with 93% yield (72.0 mg, 0.4 mmol scale) as white solid.  $^1\text{H}$  NMR (400 MHz,  $\text{CDCl}_3$ )  $\delta$  5.43 (s, 1.00H), 3.72 (d,  $J = 7.2$  Hz, 0.04H), 1.84 (s, 0.04H), 1.64 (s, 0.06H), 1.56 (s, 0.03H), 1.26 (s, 0.33H), 1.18 (s, 8.72H), 1.06 (s, 0.07H);  $^{13}\text{C}$  NMR (101 MHz,  $\text{CDCl}_3$ )  $\delta$  177.67, 47.13 (m, labeled), 38.72, 32.24 (m, labeled), 29.66 (m, labeled), 27.81, 24.09 (m, labeled).

Deuterium incorporation: 10.8 D/molecule ( $^1\text{H}$ -NMR), 10.8 D/molecule [HRMS (ESI)]

DYQ-1-94-3 #769 RT: 5.74 AV: 1 NL: 1.56E8  
T: FTMS + p ESI Full ms [70.00-300.00]

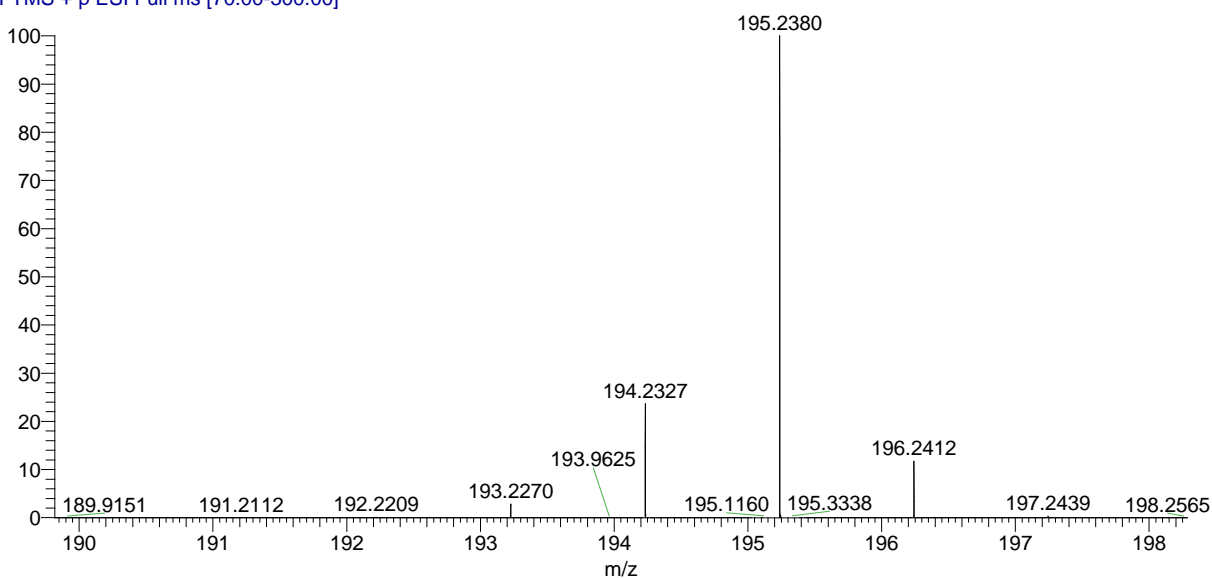

193.2270 ( $C_{11}H_{12}D_9NO + H^+$ , 2%), 194.2327 ( $C_{11}H_{11}D_{10}NO + H^+$ , 19%), 195.2380 ( $C_{11}H_{10}D_{11}NO + H^+$ , 76%).

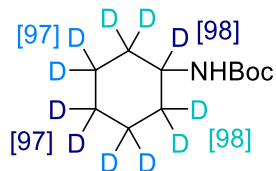

***tert*-Butyl (cyclohexyl- $d_{11}$ )carbamate (16f).** The title product was obtained with 91% yield (76.4 mg, 0.4 mmol scale) as colorless liquid.  $^1H$  NMR (400 MHz,  $CDCl_3$ )  $\delta$  4.42 (s, 1.00H), 3.39 (s, 0.02H), 1.86 (s, 0.04H), 1.77 (s, 0.23H), 1.63 (s, 0.04H), 1.59 (s, 0.03H), 1.44 (s, 8.80H), 1.28 (s, 0.07H), 1.08 (s, 0.03H), 1.04 (s, 0.06H);  $^{13}C$  NMR (101 MHz,  $CDCl_3$ )  $\delta$  155.42, 79.13, 48.96 (m, labeled), 32.48 (m, labeled), 28.63, 24.06 (m, labeled).

Deuterium incorporation: 10.7 D/molecule ( $^1H$ -NMR), 10.7 D/molecule [HRMS (ESI)].

Bfx-8-124-3 #813 RT: 6.07 AV: 1 NL: 3.13E7  
T: FTMS + p ESI Full ms [100.00-1000.00]

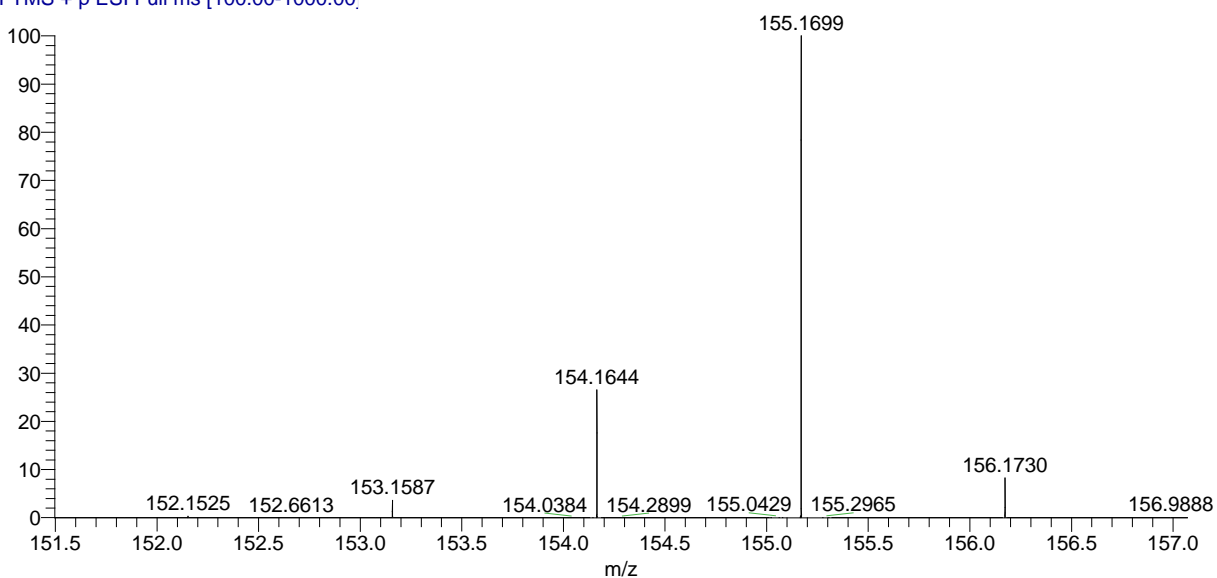

153.1587 ( $C_{11}H_{12}D_9NO_2 - C_4H_8 + H^+$ , 3%), 154.1644 ( $C_{11}H_{11}D_{10}NO_2 - C_4H_8 + H^+$ , 21%),  
155.1699 ( $C_{11}H_{10}D_{11}NO_2 - C_4H_8 + H^+$ , 76%).

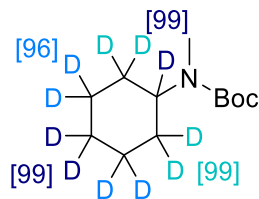

**tert-Butyl (cyclohexyl- $d_{11}$ )(methyl)carbamate (17f).** The title product was obtained with 99% yield (89.8 mg, 0.4 mmol scale) as white solid.  $^1H$  NMR (400 MHz,  $CDCl_3$ )  $\delta$  2.70 (s, 3.00H), 2.05-1.98 (m, 0.05H), 1.81 (s, 0.12H), 1.72 (s, 0.03H), 1.45 (s, 9.02H), 1.29 (s, 0.03H), 0.99 (s, 0.01H);  $^{13}C$  NMR (101 MHz,  $CDCl_3$ )  $\delta$  155.86, 79.17, 29.87 (m, labeled), 29.65 (m, labeled), 29.48 (m, labeled), 28.68, 28.35, 24.77 (m, labeled).

Deuterium incorporation: 10.8 D/molecule ( $^1H$ -NMR), 10.8 D/molecule [HRMS (ESI)].



DYQ-1-102-4 #890 RT: 6.65 AV: 1 NL: 1.12E7  
T: FTMS + p ESI Full ms [100.00-350.00]

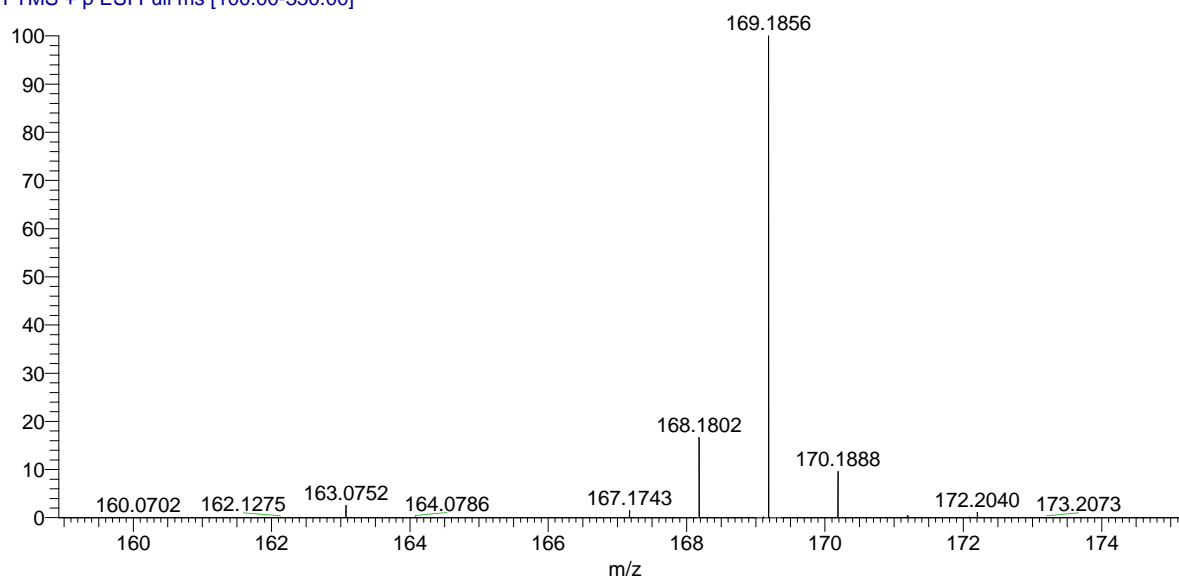

167.1743 ( $\text{C}_{12}\text{H}_{14}\text{D}_9\text{NO}_2 - \text{C}_4\text{H}_8 + \text{H}^+$ , 1%), 168.1802 ( $\text{C}_{12}\text{H}_{13}\text{D}_{10}\text{NO}_2 - \text{C}_4\text{H}_8 + \text{H}^+$ , 15%),  
169.1856 ( $\text{C}_{12}\text{H}_{12}\text{D}_{11}\text{NO}_2 - \text{C}_4\text{H}_8 + \text{H}^+$ , 84%).

ave. [96]

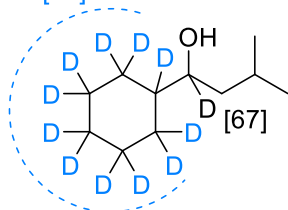

**1-(Cyclohexyl-*d*<sub>11</sub>)-3-methylbutan-1-*d*-1-ol (18f).** The title product was obtained with 99% yield (72.8 mg, 0.4 mmol scale) as colorless liquid.  $^1\text{H}$  NMR (400 MHz,  $\text{CDCl}_3$ )  $\delta$  3.39-3.31 (m, 1.33H), 1.77-1.54 (m, 1.72H), 1.45-1.39 (m, 1.52H), 1.32-1.13 (m, 1.34H), 0.97-0.82 (m, 4.84H);  $^{13}\text{C}$  NMR (101 MHz,  $\text{CDCl}_3$ )  $\delta$  73.43, 58.69, 43.10, 43.00, 27.81 (m, labeled), 26.48 (m, labeled), 24.81 (m, labeled), 24.32, 23.93, 23.58, 21.50, 19.50, 13.46.

Deuterium incorporation: 11.2 D/molecule ( $^1\text{H}$ -NMR), 11.2 D/molecule [HRMS (ESI)].

DYQ-1-112-3 #1499 RT: 6.37 AV: 1 NL: 2.03E5  
T: FTMS + p ESI Full ms [50.00-500.00]

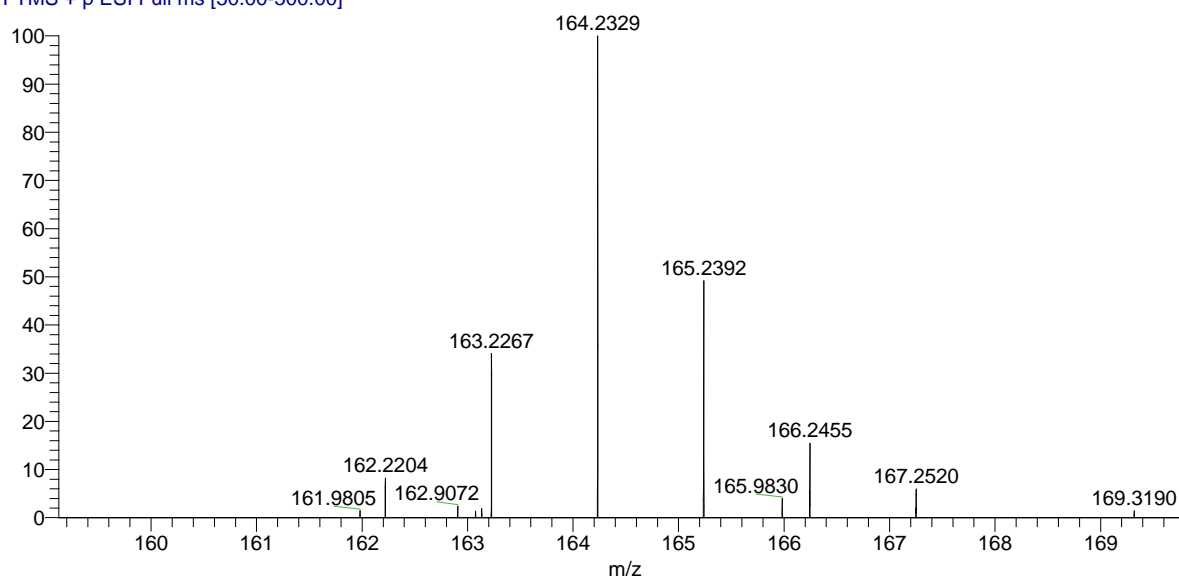

162.2204 ( $C_{11}H_{13}D_9O - H_2O + H^+$ , 4%), 163.2267 ( $C_{11}H_{12}D_{10}O - H_2O + H^+$ , 17%), 164.2329 ( $C_{11}H_{11}D_{11}O - H_2O + H^+$ , 45%), 165.2392 ( $C_{11}H_{10}D_{12}O - H_2O + H^+$ , 25%), 166.2455 ( $C_{11}H_9D_{13}O - H_2O + H^+$ , 6%), 167.2520 ( $C_{11}H_8D_{14}O - H_2O + H^+$ , 3%).

ave. [96]

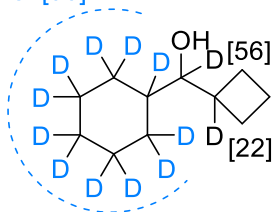

**Cyclobutyl(cyclohexyl-*d*<sub>11</sub>)methan-*d*-ol (19f).** The title product was obtained with 99% yield (72.2 mg, 0.4 mmol scale) as colorless liquid.  $^1H$  NMR (400 MHz,  $CDCl_3$ )  $\delta$  3.26 (d,  $J = 8.0$  Hz, 0.44H), 2.53-2.43 (m, 0.78H), 2.02-1.53 (m, 6.28H), 1.39 (s, 1.00H), 1.16-1.06 (m, 0.17H);  $^{13}C$  NMR (101 MHz,  $CDCl_3$ )  $\delta$  80.15, 79.70 (m, labeled), 40.80 (m, labeled), 39.10, 39.01, 28.72 (m, labeled), 25.57 (m, labeled), 25.33, 25.31, 25.17, 24.98, 24.96, 24.80, 18.44.

Deuterium incorporation: 11.3 D/molecule ( $^1H$ -NMR), 11.1 D/molecule [HRMS (ESI)].

Dyq-1-128-4\_221031190712 #1376 RT: 5.87 AV: 1 NL: 3.09E6  
T: FTMS + p ESI Full ms [100.00-500.00]

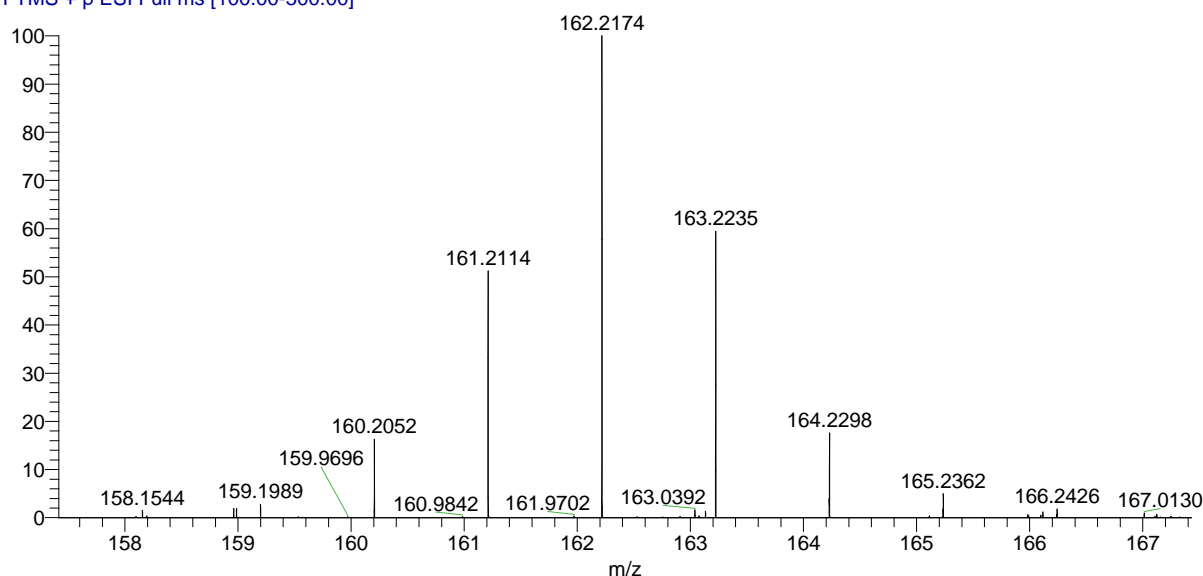

159.1989 ( $C_{11}H_{12}D_8O + H^+ - H_2O$ , 1%), 160.2052 ( $C_{11}H_{11}D_9O + H^+ - H_2O$ , 6%), 161.2114 ( $C_{11}H_{10}D_{10}O + H^+ - H_2O$ , 20%), 162.2174 ( $C_{11}H_9D_{11}O + H^+ - H_2O$ , 40%), 163.2235 ( $C_{11}H_8D_{12}O + H^+ - H_2O$ , 24%), 164.2298 ( $C_{11}H_7D_{13}O + H^+ - H_2O$ , 7%), 165.2362 ( $C_{11}H_6D_{14}O + H^+ - H_2O$ , 2%).

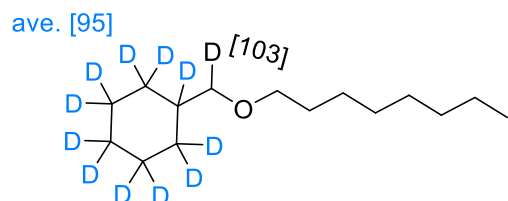

**1-((Octyloxy)methyl-*d*)cyclohexane-1,2,3,4,5,6-*d*<sub>6</sub> (20f)**. The title product was obtained with 99% yield (89.3 mg, 0.4 mmol scale) as colorless liquid.  $^1H$  NMR (400 MHz,  $CDCl_3$ )  $\delta$  3.37 (t,  $J = 6.8$  Hz, 2.00H), 3.23-3.17 (m, 0.97H), 1.82-1.75 (m, 0.10H), 1.70 (s, 0.06H), 1.65 (s, 0.07H), 1.59-1.52 (m, 1.97H), 1.34-1.26 (m, 10.07H), 1.18-1.08 (m, 0.18H), 0.89-0.86 (m, 3.13H);  $^{13}C$  NMR (101 MHz,  $CDCl_3$ )  $\delta$  76.96, 76.54 (m, labeled), 71.35, 71.31, 71.28, 37.20 (m, labeled), 32.05, 29.96, 29.68, 29.49, 26.40, 25.17 (m, labeled), 22.86, 14.27.

Deuterium incorporation: 11.5 D/molecule ( $^1H$ -NMR).

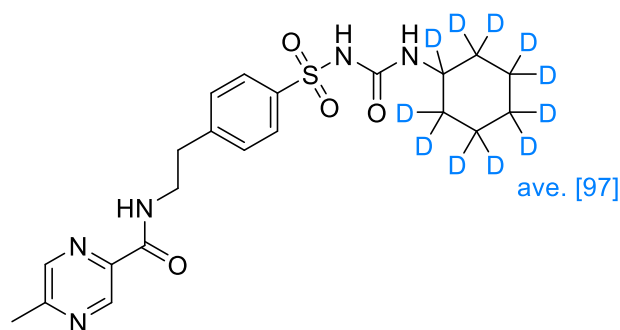

**Glipizide-*d*<sub>11</sub> ([D]1h).** The title product was obtained with 91% yield (66.8 mg, 0.16 mmol scale) as yellow solid. <sup>1</sup>H NMR (400 MHz, DMSO-*d*<sub>6</sub>) δ 9.02 (d, *J* = 1.6 Hz, 0.93H), 8.96 (t, *J* = 6.2 Hz, 1.01H), 8.59 (d, *J* = 1.2 Hz, 1.00H), 7.79 (d, *J* = 8.4 Hz, 1.93H), 7.44 (d, *J* = 8.4 Hz, 1.97H), 6.38 (s, 0.89H), 3.57 (q, *J* = 6.9 Hz, 2.00H), 2.96 (t, *J* = 7.2 Hz, 2.00H), 2.58 (s, 3.00H), 1.57 (s, 0.03H), 1.53-1.51 (m, 0.09H), 1.35 (s, 0.03H), 1.14 (s, 0.06H), 1.05-1.04 (m, 0.07H); <sup>13</sup>C NMR (101 MHz, CDCl<sub>3</sub>) δ 163.69, 157.17, 144.77, 142.93, 142.74, 142.61, 141.65, 129.35, 127.51, 40.07, 35.43, 31.90 (m, labeled), 29.27 (m, labeled), 23.44 (m, labeled), 21.40.

Deuterium incorporation: 10.7 D/molecule (<sup>1</sup>H-NMR), 10.7 D/molecule [HRMS (ESI)].

bfx-8-139-1 #1144 RT: 4.88 AV: 1 NL: 2.02E7  
T: FTMS + p ESI Full ms [100.00-500.00]

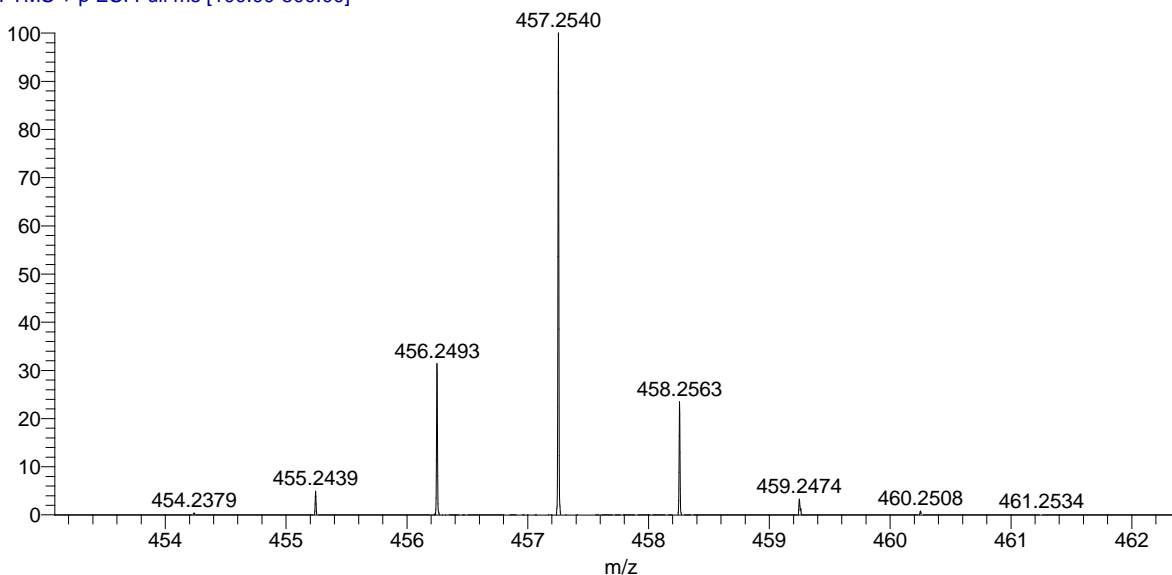

455.2439 (C<sub>21</sub>H<sub>18</sub>D<sub>9</sub>N<sub>5</sub>O<sub>4</sub>S + H<sup>+</sup>, 3%), 456.2493 (C<sub>21</sub>H<sub>17</sub>D<sub>10</sub>N<sub>5</sub>O<sub>4</sub>S + H<sup>+</sup>, 23%), 457.2540 (C<sub>21</sub>H<sub>16</sub>D<sub>11</sub>N<sub>5</sub>O<sub>4</sub>S + H<sup>+</sup>, 73%).

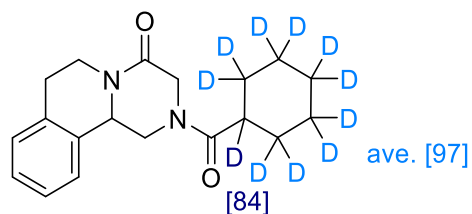

**Praziquantel-*d*<sub>11</sub> ([D]2h).** The title product was obtained with 41% yield (66.3 mg, 0.5 mmol scale) as white solid. <sup>1</sup>H NMR (400 MHz, CDCl<sub>3</sub>) δ 7.28-7.17 (m, 4.00H), 5.16 (dd, *J* = 2.6, 13.4 Hz, 0.70H), 4.99-4.77 (m, 2.22H), 4.46 (d, *J* = 17.6 Hz, 0.73H), 4.38-4.31 (m, 0.29H), 4.07 (d, *J* = 17.2 Hz, 0.78H), 3.85 (d, *J* = 18.4 Hz, 0.22H), 3.30-3.22 (m, 0.35H), 3.02-2.76 (m, 3.68H), 2.53-2.43 (m, 0.16H), 1.76-1.65 (m, 0.16H), 1.50-1.42 (m, 0.08H), 1.22-1.20 (m, 0.09H); <sup>13</sup>C NMR (101 MHz, CDCl<sub>3</sub>) δ 175.02, 165.71, 164.56, 135.66, 134.87, 132.91, 129.82, 129.44, 128.97, 128.79, 127.85, 127.69, 127.59, 127.12, 125.62, 125.32, 55.93, 55.10, 49.67, 49.14, 46.44, 45.27, 40.50, 40.11 (m, labeled), 39.24, 38.79, 28.86, 28.33 (m, labeled), 24.72 (m, labeled).

Deuterium incorporation: 10.5 D/molecule (<sup>1</sup>H-NMR), 10.5 D/molecule [HRMS (ESI)].

bfx-xj-155-1 #1200 RT: 5.11 AV: 1 NL: 3.78E7  
T: FTMS + p ESI Full ms [100.00-500.00]

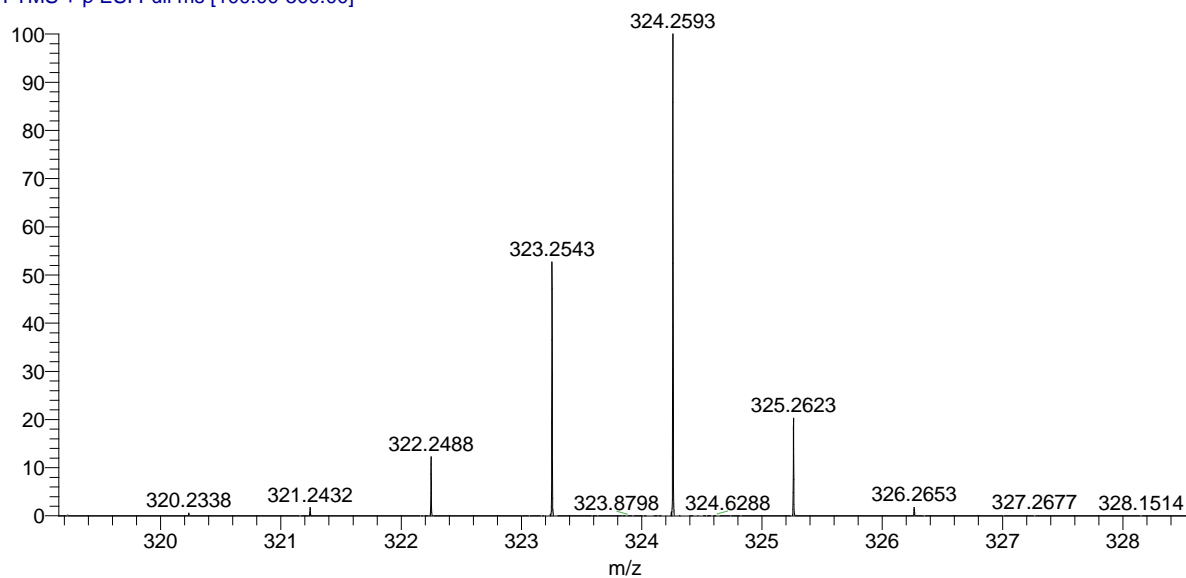

321.2432 (C<sub>19</sub>H<sub>16</sub>D<sub>8</sub>N<sub>2</sub>O<sub>2</sub> + H<sup>+</sup>, 1%), 322.2488 (C<sub>19</sub>H<sub>15</sub>D<sub>9</sub>N<sub>2</sub>O<sub>2</sub> + H<sup>+</sup>, 8%), 323.2543 (C<sub>19</sub>H<sub>14</sub>D<sub>10</sub>N<sub>2</sub>O<sub>2</sub> + H<sup>+</sup>, 32%), 324.2593 (C<sub>19</sub>H<sub>13</sub>D<sub>11</sub>N<sub>2</sub>O<sub>2</sub> + H<sup>+</sup>, 60%).

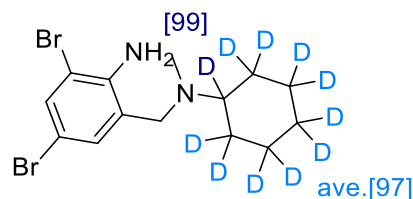

**Bromhexine-*d*<sub>11</sub> ([D]3h).** The title product was obtained with 36% yield (48.7 mg, 0.35 mmol scale) as colorless liquid. <sup>1</sup>H NMR (400 MHz, CDCl<sub>3</sub>) δ 7.54-7.49 (m, 0.63H), 7.18-7.14 (m, 0.96H), 5.30-5.02 (m, 2.00H), 4.22-4.05 (m, 2.04H), 2.77-2.59 (m, 3.01H), 1.69 (t, *J* = 1.2 Hz, 0.02H), 1.59-1.56 (m, 0.13H), 1.43-1.36 (m, 0.13H); <sup>13</sup>C NMR (101 MHz, CDCl<sub>3</sub>) δ 143.76, 143.60, 143.57, 134.26, 134.14, 134.06, 133.94, 132.28, 132.26, 124.02, 123.82, 123.55, 123.36, 110.53, 110.38, 108.52, 108.48, 108.32, 58.61, 58.41, 41.42, 41.03.

Deuterium incorporation: 10.7 D/molecule (<sup>1</sup>H-NMR).

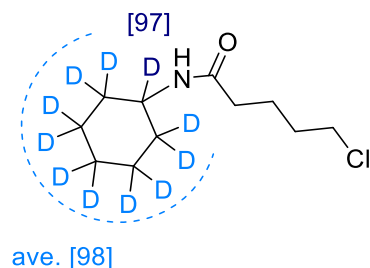

**5-Chloro-N-(cyclohexyl-*d*<sub>11</sub>)pentanamide (4h).** The title product was obtained with 79% yield (108.1 mg, 0.4 mmol scale) as white solid. <sup>1</sup>H NMR (400 MHz, CDCl<sub>3</sub>) δ 10.52 (s, 0.68H), 5.64 (s, 0.32H), 3.55-3.51 (m, 2.00H), 3.38-3.27 (m, 0.03H), 2.56-2.17 (m, 2.01H), 1.90-1.63 (m, 4.13H), 1.32-1.27 (m, 0.06H), 1.11-1.05 (m, 0.04H); <sup>13</sup>C NMR (101 MHz, CDCl<sub>3</sub>) δ 178.50, 172.30, 47.81 (m, labeled), 44.73, 44.57, 36.02, 33.34, 32.13 (m, labeled), 32.03, 31.88, 24.09 (m, labeled), 23.25, 22.18.

Deuterium incorporation: 10.7 D/molecule (<sup>1</sup>H-NMR), 10.7 D/molecule [HRMS (ESI)].

bfX-8-132-2 #1150 RT: 4.89 AV: 1 NL: 1.88E8  
T: FTMS + p ESI Full ms [100.00-500.00]

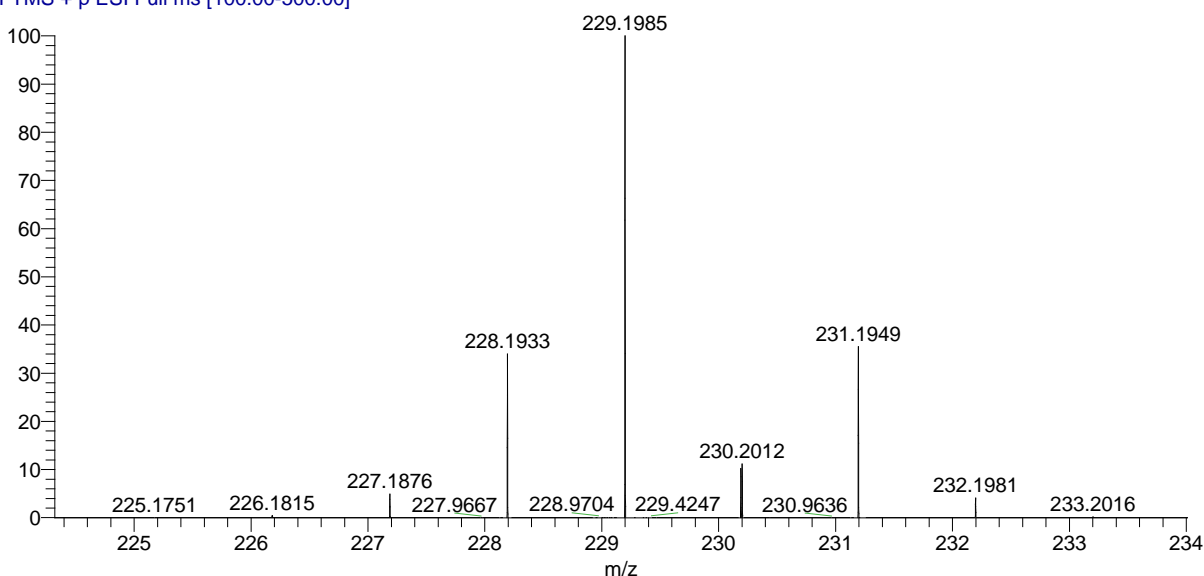

227.1876 ( $C_{11}H_{11}D_9ClNO + H^+$ , 4%), 228.1933 ( $C_{11}H_{10}D_{10}ClNO + H^+$ , 23%), 229.1985 ( $C_{11}H_9D_{11}ClNO + H^+$ , 73%).

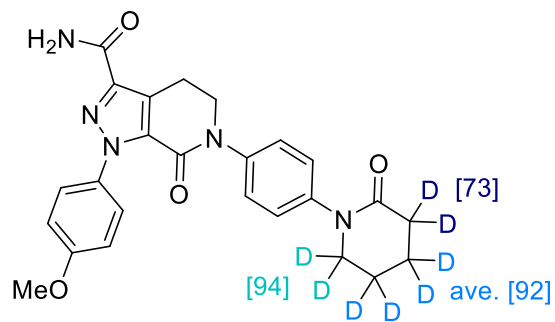

**Apixaban- $d_7$  ([D]5h).** The title product was obtained with 59% yield (82.8 mg, 0.3 mmol scale) as white solid.  $^1H$  NMR (400 MHz,  $DMSO-d_6$ )  $\delta$  7.78 (m, 0.98H), 7.53-7.48 (m, 3.60H), 7.42 (d,  $J = 8.8$  Hz, 0.61H), 7.34 (d,  $J = 8.8$  Hz, 1.40H), 7.27 (d,  $J = 8.8$  Hz, 1.42H), 7.02-6.98 (m, 2.00H), 4.11-4.03 (m, 2.00H), 3.79 (s, 3.00H), 3.55 (s, 0.13H), 3.24-3.18 (m, 2.00H), 2.35 (d,  $J = 8.0$  Hz, 0.54H), 1.82-1.75 (m, 0.31H);  $^{13}C$  NMR (101 MHz,  $DMSO-d_6$ )  $\delta$  168.97, 163.23, 161.25, 159.14, 156.72, 156.67, 141.78, 141.53, 141.50, 141.36, 139.81, 138.26, 133.00, 132.90, 132.57, 132.55, 126.94, 126.88, 126.85, 126.34, 126.29, 126.03, 125.40, 125.27, 113.43, 113.41, 55.51, 50.96, 50.93, 32.04 (m, labeled), 28.95 (m, labeled), 21.85 (m, labeled), 21.09.

Deuterium incorporation: 7.0 D/molecule ( $^1\text{H}$ -NMR), 6.8 D/molecule [HRMS (ESI)].

BFX-8-183-1-2 #819 RT: 6.12 AV: 1 NL: 2.81E7  
T: FTMS + p ESI Full ms [150.00-800.00]

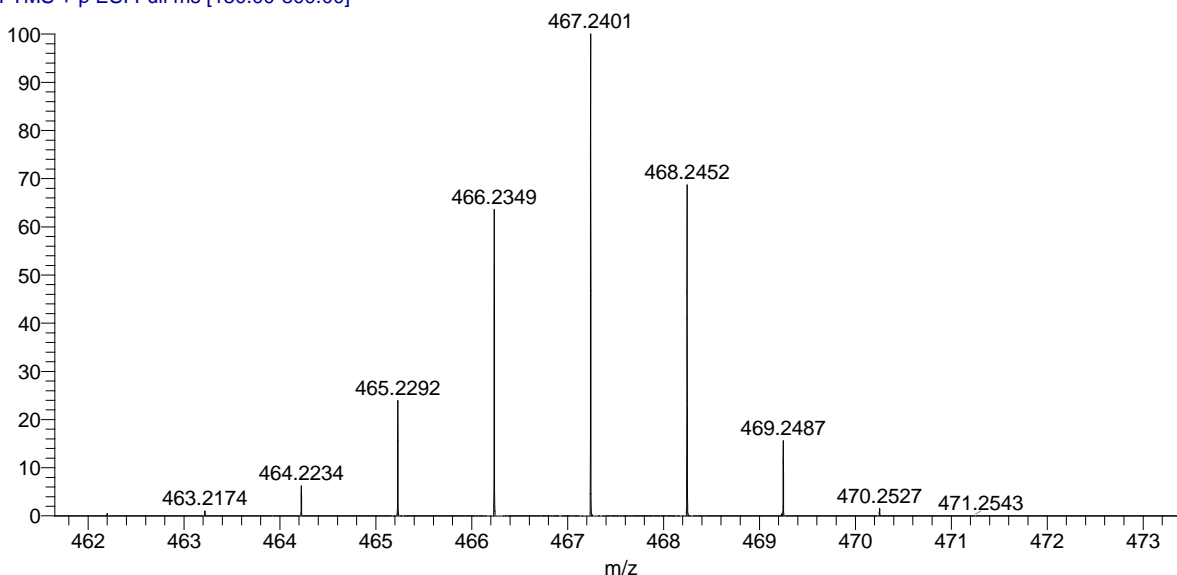

464.2234 ( $\text{C}_{25}\text{H}_{21}\text{D}_4\text{N}_5\text{O}_4 + \text{H}^+$ , 2%), 465.2292 ( $\text{C}_{25}\text{H}_{20}\text{D}_5\text{N}_5\text{O}_4 + \text{H}^+$ , 9%), 466.2349 ( $\text{C}_{25}\text{H}_{19}\text{D}_6\text{N}_5\text{O}_4 + \text{H}^+$ , 25%), 467.2401 ( $\text{C}_{25}\text{H}_{18}\text{D}_7\text{N}_5\text{O}_4 + \text{H}^+$ , 37%), 468.2452 ( $\text{C}_{25}\text{H}_{17}\text{D}_8\text{N}_5\text{O}_4 + \text{H}^+$ , 27%).

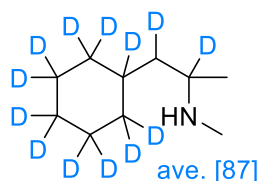

**Propylhexedrine- $d_{11}$  ([D]6h).** The title product was obtained with 43% yield (28.8 mg, 0.4 mmol scale) as colorless liquid.  $^1\text{H}$  NMR (400 MHz,  $\text{CDCl}_3$ )  $\delta$  3.13 (q,  $J = 8.0$  Hz, 3.00H), 2.77-2.64 (m, 0.20H), 2.33 (t,  $J = 7.6$  Hz, 0.08H), 2.23 (t,  $J = 7.6$  Hz, 0.17H), 2.01 (q,  $J = 6.4$  Hz, 0.38H), 1.64-1.39 (m, 4.84H);  $^{13}\text{C}$  NMR (101 MHz,  $\text{CDCl}_3$ )  $\delta$  46.06, 29.90 (m, labeled), 29.53 (m, labeled), 8.82.

Deuterium incorporation: 11.3 D/molecule ( $^1\text{H}$ -NMR), 11.4 D/molecule [HRMS (ESI)].



bfx-8-169-3 #536 RT: 4.00 AV: 1 NL: 1.77E7  
T: FTMS + p ESI Full ms [100.00-1000.00]

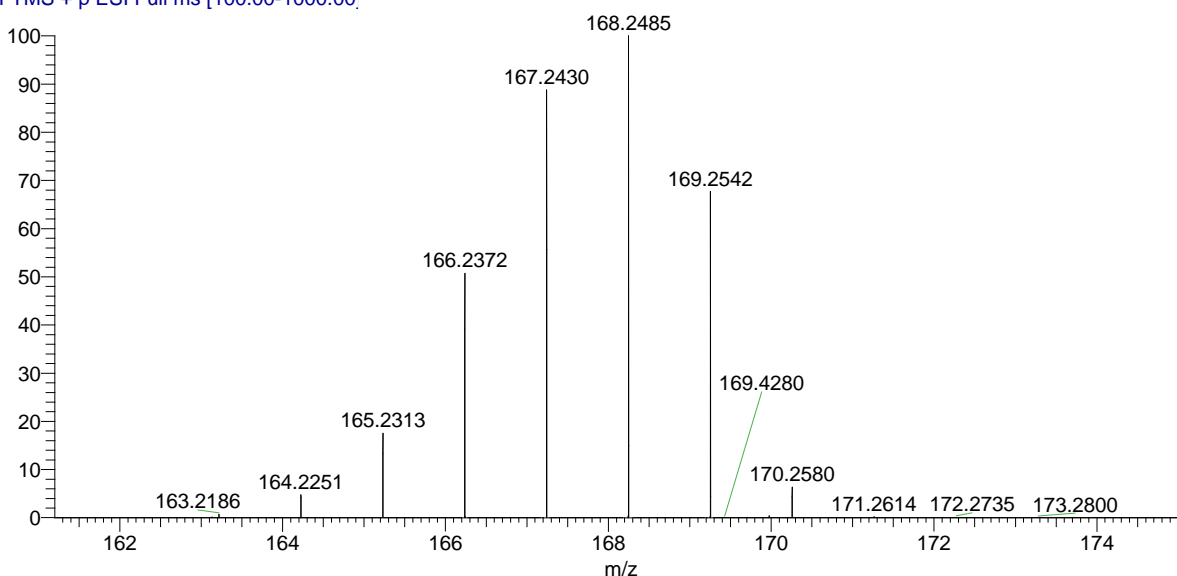

164.2251 ( $C_{10}H_{13}D_8N + H^+$ , 1%), 165.2313 ( $C_{10}H_{12}D_9N + H^+$ , 5%), 166.2372 ( $C_{10}H_{11}D_{10}N + H^+$ , 15%), 167.2430 ( $C_{10}H_{10}D_{11}N + H^+$ , 28%), 168.2485 ( $C_{10}H_9D_{12}N + H^+$ , 30%), 169.2542 ( $C_{10}H_8D_{13}N + H^+$ , 20%).

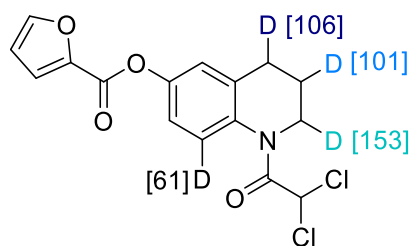

**Quinfamide-*d*<sub>4</sub> ([D]7h).** The title product was obtained with 84% yield (371.6 mg, 1.24 mmol scale) as white solid.  $^1H$  NMR (400 MHz,  $CDCl_3$ )  $\delta$  7.70 (s, 1.00H), 7.40 (d,  $J = 3.6$  Hz, 1.02H), 7.25 (d,  $J = 8.0$  Hz, 0.39H), 7.14-7.03 (m, 2.00H), 6.62 (s, 1.00H), 6.48 (s, 0.99H), 3.85 (s, 0.47H), 2.74 (s, 0.94H), 2.00 (s, 0.99H);  $^{13}C$  NMR (101 MHz,  $CDCl_3$ )  $\delta$  164.07, 156.80, 148.55, 147.61, 143.53, 136.31, 135.35, 135.27, 123.90, 122.32, 120.33, 120.06, 112.44, 63.96, 43.75 (m, labeled), 26.09 (m, labeled), 22.79 (m, labeled).

Deuterium incorporation: 4.2 D/molecule ( $^1H$ -NMR), 3.8 D/molecule [HRMS (ESI)].

bfj-xj-18-3 #786 RT: 5.87 AV: 1 NL: 6.96E7  
T: FTMS + p ESI Full ms [100.00-1000.00]

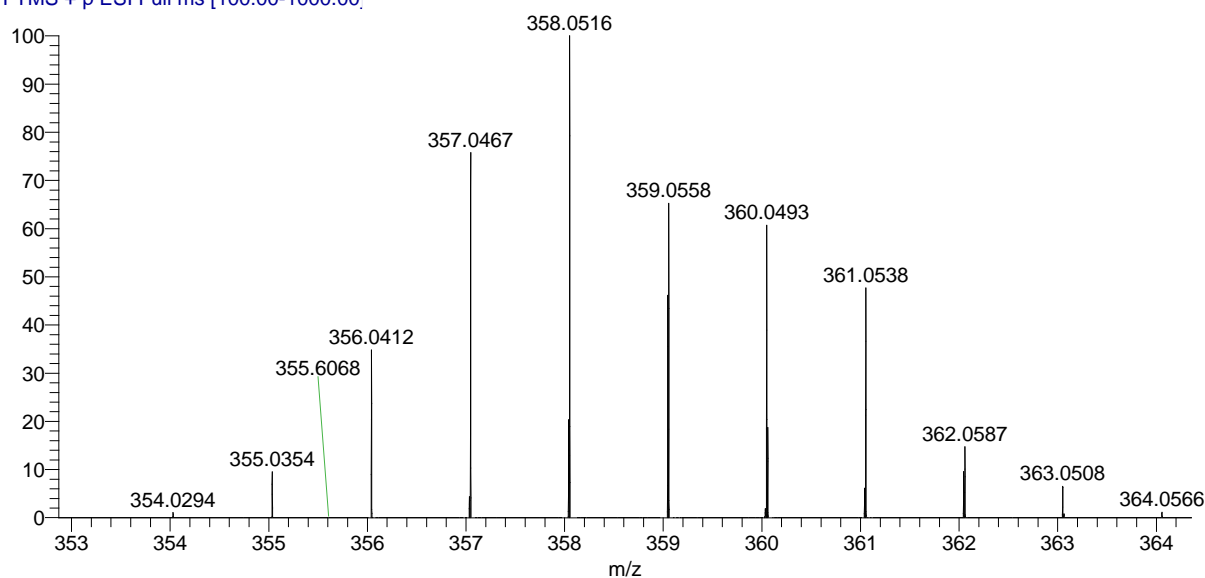

355.0354 ( $\text{C}_{16}\text{H}_{12}\text{D}_1\text{C}_{12}\text{NO}_4 + \text{H}^+$ , 3%), 356.0412 ( $\text{C}_{16}\text{H}_{11}\text{D}_2\text{C}_{12}\text{NO}_4 + \text{H}^+$ , 11%), 357.0467 ( $\text{C}_{16}\text{H}_{10}\text{D}_3\text{C}_{12}\text{NO}_4 + \text{H}^+$ , 24%), 358.0516 ( $\text{C}_{16}\text{H}_9\text{D}_4\text{C}_{12}\text{NO}_4 + \text{H}^+$ , 33%), 359.0558 ( $\text{C}_{16}\text{H}_8\text{D}_5\text{C}_{12}\text{NO}_4 + \text{H}^+$ , 23%), 360.0601 ( $\text{C}_{16}\text{H}_7\text{D}_6\text{C}_{12}\text{NO}_4 + \text{H}^+$ , 6%).

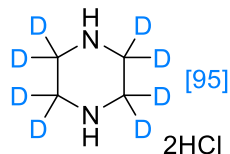

**Piperazine-2,2,3,3,5,5,6,6-*d*<sub>8</sub> hydrochloride (10d')**. The title product was obtained with 65% yield (10.9 g, 100 mmol scale) as white solid.  $^1\text{H}$  NMR (400 MHz,  $\text{D}_2\text{O}$ )  $\delta$  3.49 (s);  $^{13}\text{C}$  NMR (101 MHz,  $\text{D}_2\text{O}$ )  $\delta$  39.60 (m, labeled).

Deuterium incorporation: 7.6 D/molecule [HRMS (ESI)].

Bfx-8-158-36h #177 RT: 0.75 AV: 1 NL: 6.37E6  
T: FTMS + p ESI Full ms [50.00-500.00]

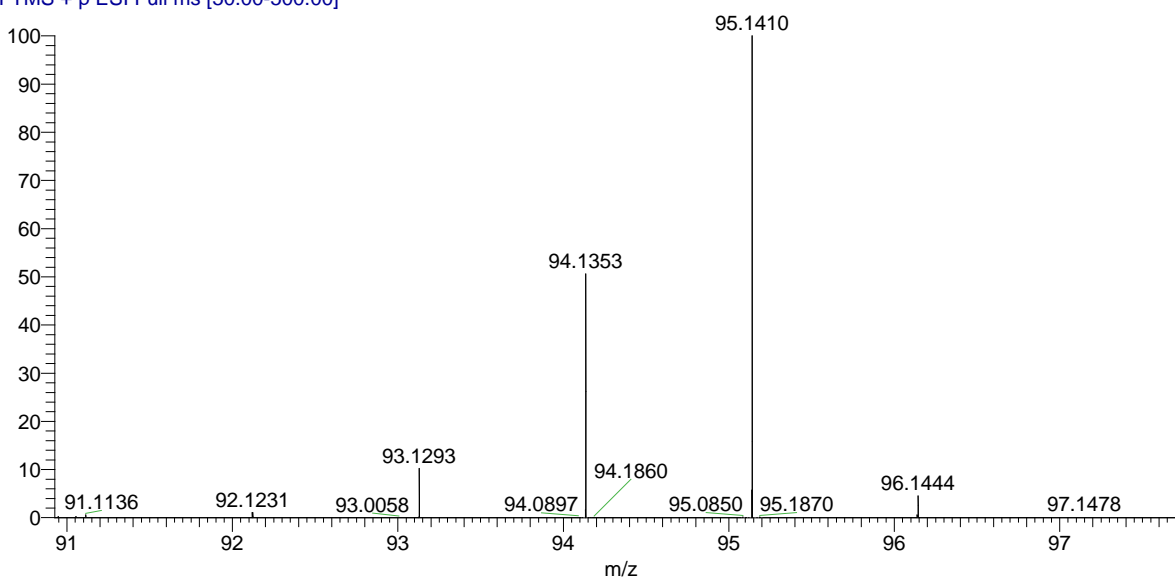

93.1293 ( $C_4H_4D_6N_2 + H^+$ , 6%), 94.1353 ( $C_4H_3D_7N_2 + H^+$ , 30%), 95.1410 ( $C_4H_2D_8N_2 + H^+$ , 64%).

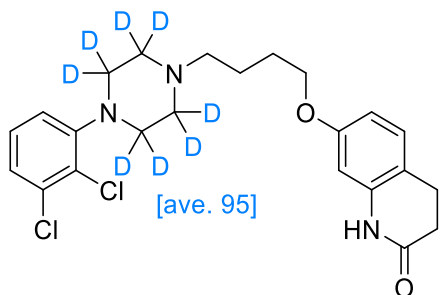

**Aripiprazole-*d*<sub>8</sub> ([D]8h).** The title product was obtained with 99% yield (91.3 mg, 0.2 mmol scale) as white solid.  $^1H$  NMR (400 MHz,  $CDCl_3$ )  $\delta$  9.02 (s, 1.00H), 7.15 (s, 1.98H), 7.04 (d,  $J = 8.4$  Hz, 0.99H), 6.96 (s, 0.98H), 6.52 (d,  $J = 8.4$  Hz, 1.00H), 6.39 (s, 1.00H), 3.96 (s, 1.97H), 3.04 (s, 0.40H), 2.89 (t,  $J = 7.6$  Hz, 2.01H), 2.62 (t,  $J = 7.6$  Hz, 2.01H), 2.49 (t,  $J = 7.6$  Hz, 2.01H), 1.85-1.67 (m, 4.00H);  $^{13}C$  NMR (101 MHz,  $CDCl_3$ )  $\delta$  172.52, 158.78, 151.41, 138.34, 134.13, 128.75, 127.63, 127.52, 124.66, 118.69, 115.79, 108.83, 102.38, 67.97, 58.29, 52.61 (m, labeled), 50.57 (m, labeled), 31.23, 29.87, 27.41, 24.70, 23.56.

Deuterium incorporation: 7.6 D/molecule ( $^1H$ -NMR), 7.5 D/molecule [HRMS (ESI)].

bfj-xj-13-2 #624 RT: 4.66 AV: 1 NL: 3.03E8  
T: FTMS + p ESI Full ms [100.00-1000.00]

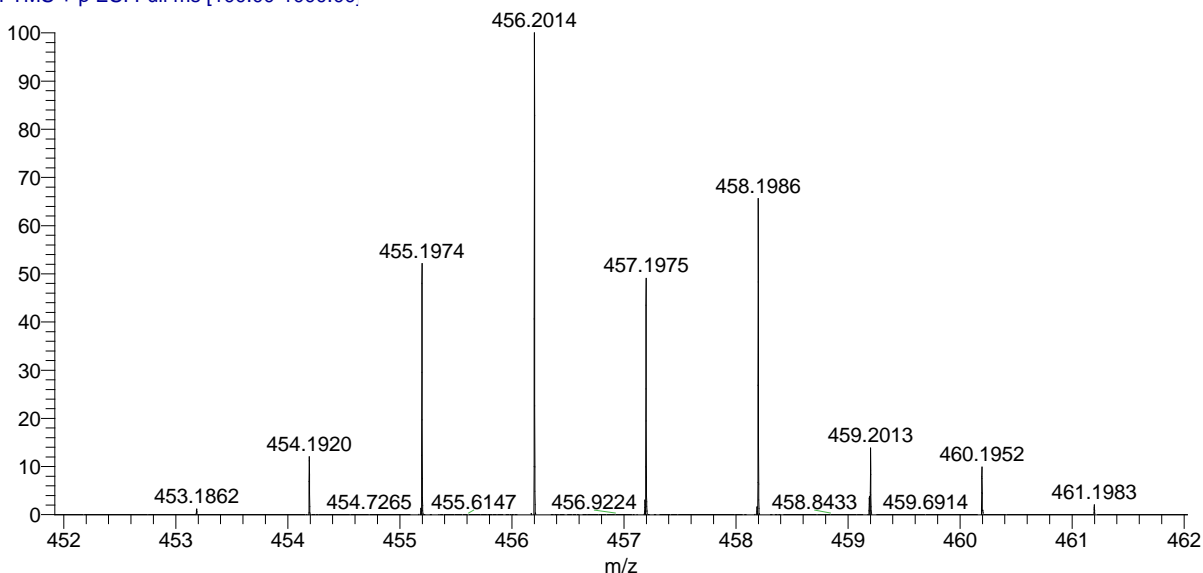

453.1862 ( $C_{23}H_{22}D_5C_{12}N_3O_2 + H^+$ , 1%), 454.1920 ( $C_{23}H_{21}D_6C_{12}N_3O_2 + H^+$ , 7%), 455.1974 ( $C_{23}H_{20}D_7C_{12}N_3O_2 + H^+$ , 31%), 456.2014 ( $C_{23}H_{19}D_8C_{12}N_3O_2 + H^+$ , 61%).

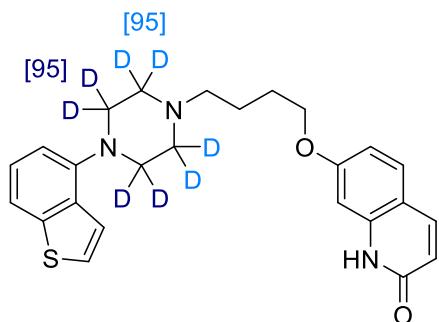

**Brexpiprazole-*d*<sub>8</sub> ([D]9h).** The title product was obtained with 71% yield (47.2 mg, 0.15 mmol scale) as white solid.  $^1H$  NMR (400 MHz,  $CDCl_3$ )  $\delta$  12.84 (s, 1.00H), 7.74 (d,  $J = 9.2$  Hz, 1.00H), 7.55 (d,  $J = 8.0$  Hz, 0.99H), 7.45-7.38 (m, 3.00H), 7.27 (t,  $J = 7.8$  Hz, 1.18H), 6.90-6.88 (m, 1.99H), 6.82 (dd,  $J = 2.4, 8.8$  Hz, 1.00H), 6.57 (d,  $J = 9.2$  Hz, 1.00H), 4.11 (t,  $J = 6.2$  Hz, 2.00H), 3.17 (s, 0.21H), 2.67 (s, 0.21H), 2.54 (t,  $J = 7.6$  Hz, 1.96H), 1.92-1.73 (m, 4.00H);  $^{13}C$  NMR (101 MHz,  $CDCl_3$ )  $\delta$  165.43, 161.55, 148.61, 141.23, 141.10, 140.59, 134.13, 129.16, 125.19, 125.13, 122.05, 117.92, 117.09, 114.33, 112.94, 112.25, 99.08, 68.25, 58.38, 52.69 (m, labeled), 51.36 (m, labeled), 27.35, 23.59.

Deuterium incorporation: 7.6 D/molecule ( $^1H$ -NMR), 7.5 D/molecule [HRMS (ESI)].

bfj-xj-12-2 #597 RT: 4.46 AV: 1 NL: 2.26E8  
T: FTMS + p ESI Full ms [100.00-1000.00]

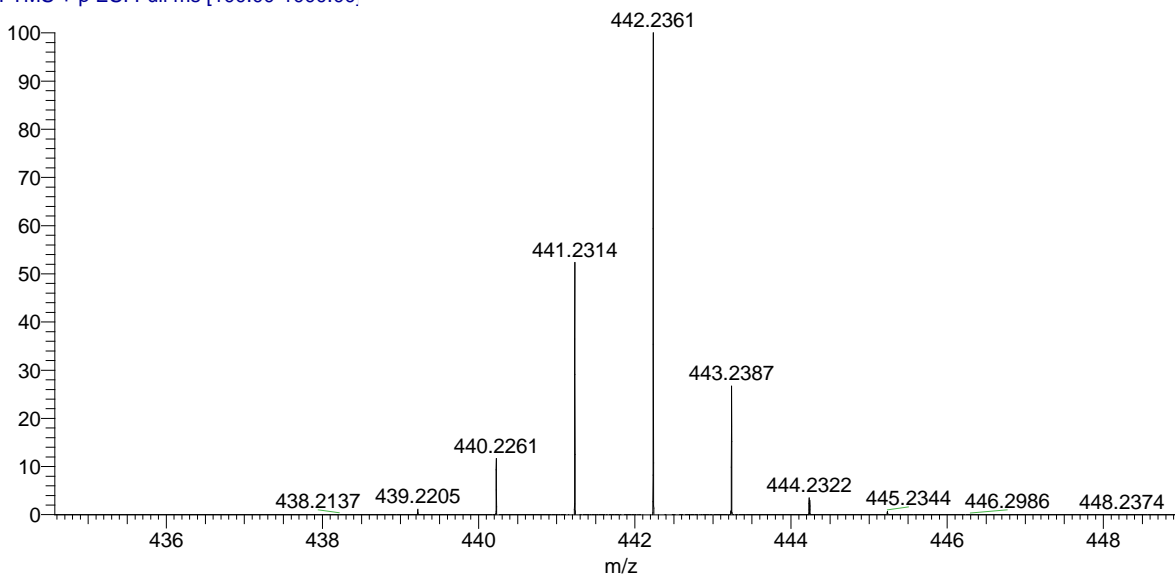

439.2205 ( $\text{C}_{25}\text{H}_{22}\text{D}_5\text{N}_3\text{O}_2\text{S} + \text{H}^+$ , 1%), 440.2261 ( $\text{C}_{25}\text{H}_{21}\text{D}_6\text{N}_3\text{O}_2\text{S} + \text{H}^+$ , 7%), 441.2314 ( $\text{C}_{25}\text{H}_{20}\text{D}_7\text{N}_3\text{O}_2\text{S} + \text{H}^+$ , 31%), 442.2361 ( $\text{C}_{25}\text{H}_{19}\text{D}_8\text{N}_3\text{O}_2\text{S} + \text{H}^+$ , 61%).

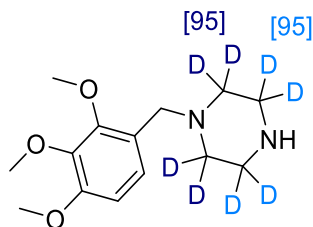

**Trimetazidine- $d_8$  ([D]10h).** The title product was obtained with 16% yield (21.3 mg, 0.5 mmol scale) as colorless liquid.  $^1\text{H}$  NMR (400 MHz,  $\text{CDCl}_3$ )  $\delta$  6.94 (d,  $J = 8.0$  Hz, 1.01H), 6.65-6.49 (m, 2.98H), 3.86-3.85 (m, 9.00H), 3.51 (s, 1.99H), 3.11 (s, 0.21H), 2.67 (s, 0.21H);  $^{13}\text{C}$  NMR (101 MHz,  $\text{CDCl}_3$ )  $\delta$  153.45, 152.83, 142.45, 125.35, 122.92, 107.11, 61.45, 61.00, 56.48, 56.13, 49.33 (m, labeled), 43.57 (m, labeled).

Deuterium incorporation: 7.6 D/molecule ( $^1\text{H}$ -NMR), 7.5 D/molecule [HRMS (ESI)].

bfx-xj-17-2 #151 RT: 1.12 AV: 1 NL: 3.36E7  
T: FTMS + p ESI Full ms [100.00-1000.00]

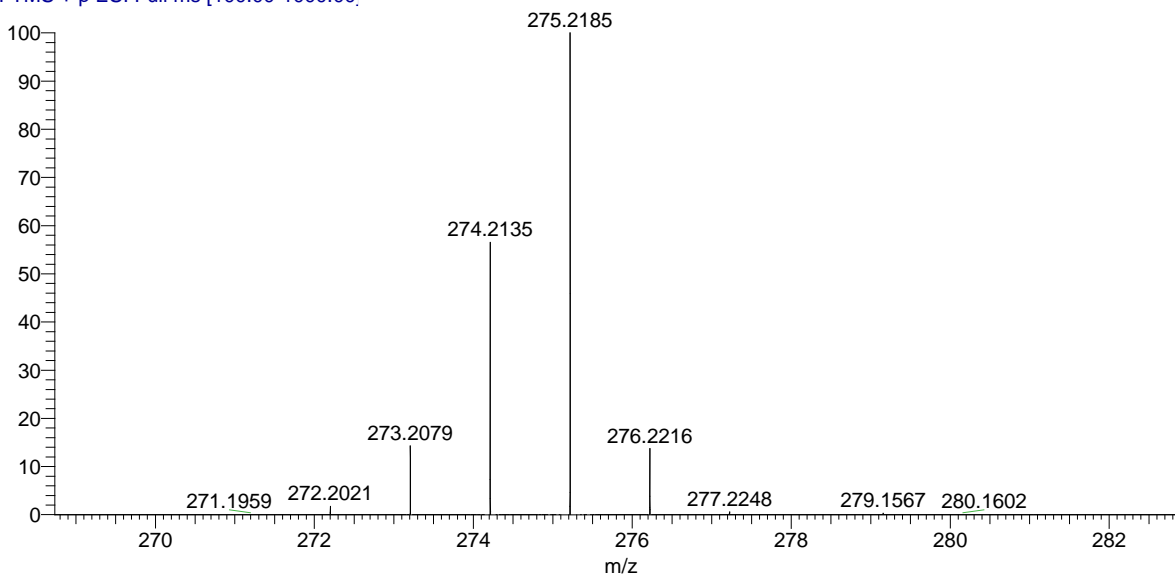

272.2021 ( $\text{C}_{14}\text{H}_{17}\text{D}_5\text{N}_2\text{O}_3 + \text{H}^+$ , 1%), 273.2079 ( $\text{C}_{14}\text{H}_{16}\text{D}_6\text{N}_2\text{O}_3 + \text{H}^+$ , 8%), 274.2135 ( $\text{C}_{14}\text{H}_{15}\text{D}_7\text{N}_2\text{O}_3 + \text{H}^+$ , 33%), 275.2185 ( $\text{C}_{14}\text{H}_{14}\text{D}_8\text{N}_2\text{O}_3 + \text{H}^+$ , 59%).

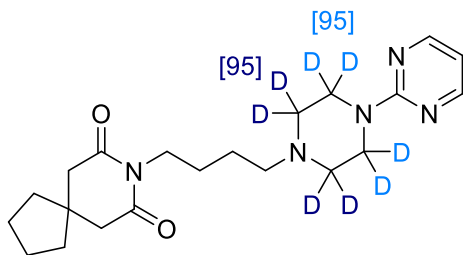

**Buspirone-*d*<sub>8</sub> ([D]11h).** The title product was obtained with 93% yield (109.8 mg, 0.3 mmol scale) as white solid.  $^1\text{H}$  NMR (400 MHz,  $\text{CDCl}_3$ )  $\delta$  8.24 (d,  $J = 4.4$  Hz, 1.98H), 6.42 (t,  $J = 4.8$  Hz, 1.00H), 3.75-3.71 (m, 2.21H), 2.53 (s, 4.01H), 2.39 (d,  $J = 7.6$  Hz, 0.21H), 2.33 (t,  $J = 7.0$  Hz, 1.98H), 1.67-1.64 (m, 4.01H) 1.49-1.42 (m, 8.00H);  $^{13}\text{C}$  NMR (101 MHz,  $\text{CDCl}_3$ )  $\delta$  172.29, 161.68, 157.77, 109.80, 58.35, 52.33 (m, labeled), 44.93, 42.94 (m, labeled), 39.54, 39.42, 37.59, 26.09, 24.31, 24.23.

Deuterium incorporation: 7.6 D/molecule ( $^1\text{H}$ -NMR), 7.6 D/molecule [HRMS (ESI)].

bfj-xj-14-2 #549 RT: 4.09 AV: 1 NL: 3.01E8  
T: FTMS + p ESI Full ms [100.00-1000.00]

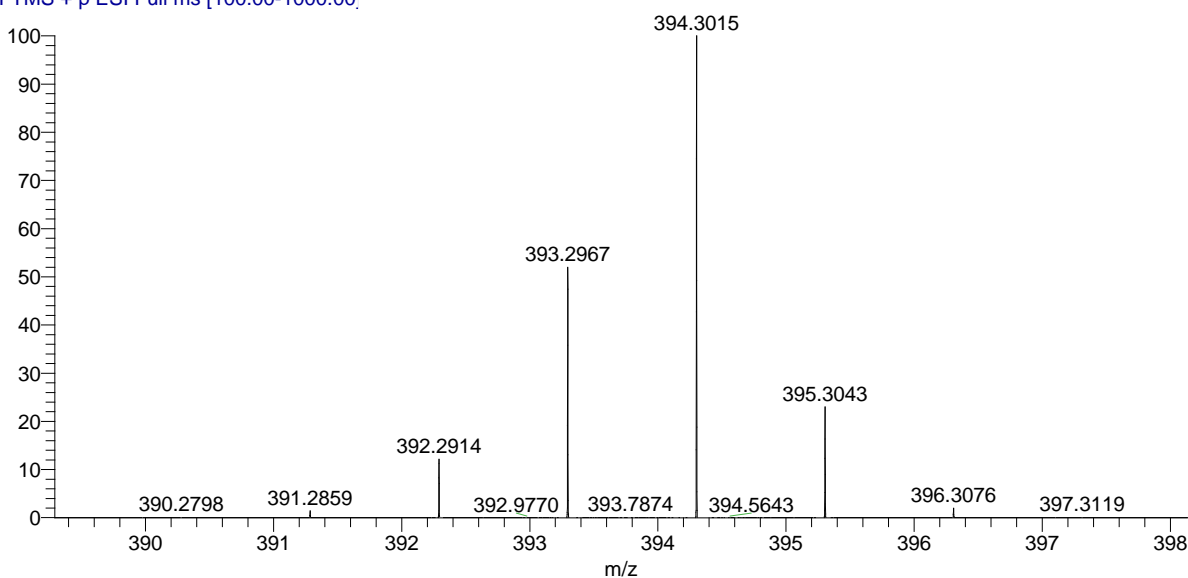

391.2859 ( $\text{C}_{21}\text{H}_{26}\text{D}_5\text{N}_5\text{O}_2 + \text{H}^+$ , 1%), 392.2914 ( $\text{C}_{21}\text{H}_{25}\text{D}_6\text{N}_5\text{O}_2 + \text{H}^+$ , 5%), 393.2967 ( $\text{C}_{21}\text{H}_{24}\text{D}_7\text{N}_5\text{O}_2 + \text{H}^+$ , 32%), 394.3015 ( $\text{C}_{21}\text{H}_{23}\text{D}_8\text{N}_5\text{O}_2 + \text{H}^+$ , 62%).

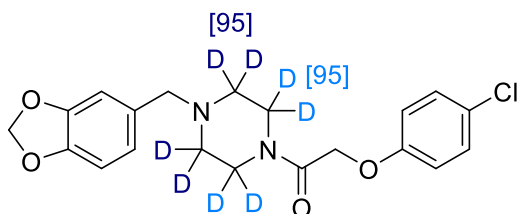

**Fipexide-*d*<sub>8</sub> ([D]12h).** The title product was obtained with 84% yield (119.0 mg, 0.3 mmol scale) as white solid.  $^1\text{H}$  NMR (400 MHz,  $\text{CDCl}_3$ )  $\delta$  7.23 (d,  $J = 8.8$  Hz, 1.98H), 6.88-6.83 (m, 3.00H), 6.75-6.70 (m, 2.00H), 5.94 (s, 2.00H), 4.65 (s, 2.01H), 3.53 (d,  $J = 27.2$  Hz, 0.21H), 3.40 (s, 1.97H), 2.34 (d,  $J = 4.8$  Hz, 0.21H);  $^{13}\text{C}$  NMR (101 MHz,  $\text{CDCl}_3$ )  $\delta$  166.09, 156.56, 147.82, 146.86, 131.51, 129.59, 126.60, 122.28, 116.04, 109.42, 108.04, 101.08, 67.83, 62.53, 51.93 (m, labeled), 44.69 (m, labeled).

Deuterium incorporation: 7.6 D/molecule ( $^1\text{H}$ -NMR), 7.5 D/molecule [HRMS (ESI)].

bfj-xj-16-2 #579 RT: 4.32 AV: 1 NL: 2.66E8  
T: FTMS + p ESI Full ms [100.00-1000.00]

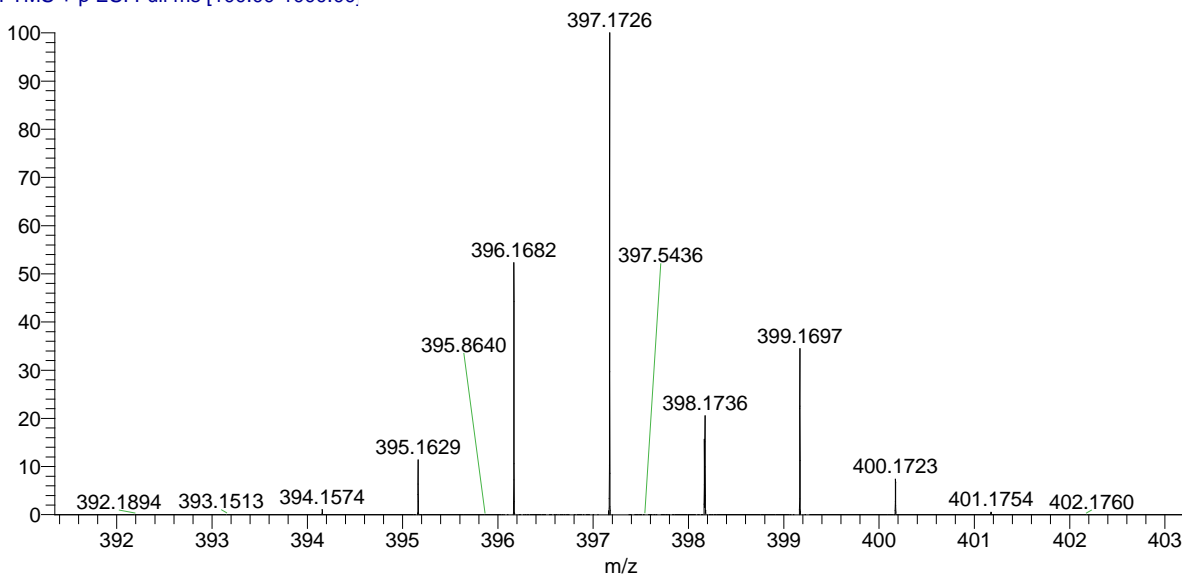

394.1574 ( $\text{C}_{20}\text{H}_{16}\text{D}_5\text{ClN}_2\text{O}_4 + \text{H}^+$ , 1%), 395.1629 ( $\text{C}_{20}\text{H}_{15}\text{D}_6\text{ClN}_2\text{O}_4 + \text{H}^+$ , 7%), 396.1682 ( $\text{C}_{20}\text{H}_{14}\text{D}_7\text{ClN}_2\text{O}_4 + \text{H}^+$ , 32%), 397.1726 ( $\text{C}_{20}\text{H}_{13}\text{D}_8\text{ClN}_2\text{O}_4 + \text{H}^+$ , 60%).

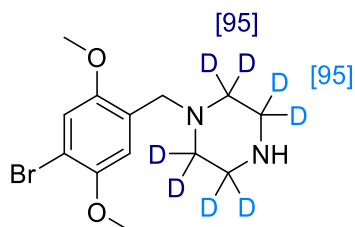

**2C-B-BZP-*d*<sub>8</sub> ([D]13h).** The title product was obtained with 92% yield (89.2 mg, 0.3 mmol scale) as white solid.  $^1\text{H}$  NMR (400 MHz,  $\text{CDCl}_3$ )  $\delta$  7.55 (s, 2.01H), 7.02 (s, 1.00H), 6.91 (s, 0.99H), 3.82 (s, 3.00H), 3.73 (s, 3.02H), 3.51 (s, 2.00H), 3.12 (s, 0.21H), 2.67 (s, 0.21H);  $^{13}\text{C}$  NMR (101 MHz,  $\text{CDCl}_3$ )  $\delta$  152.22, 150.07, 125.46, 116.22, 114.34, 110.35, 56.99, 56.33, 55.40, 49.26 (m, labeled), 43.25 (m, labeled).

Deuterium incorporation: 7.6 D/molecule ( $^1\text{H}$ -NMR), 7.5 D/molecule [HRMS (ESI)].



bfx-xj-19-1 #443 RT: 3.30 AV: 1 NL: 1.06E8  
T: FTMS + p ESI Full ms [100.00-1000.00]

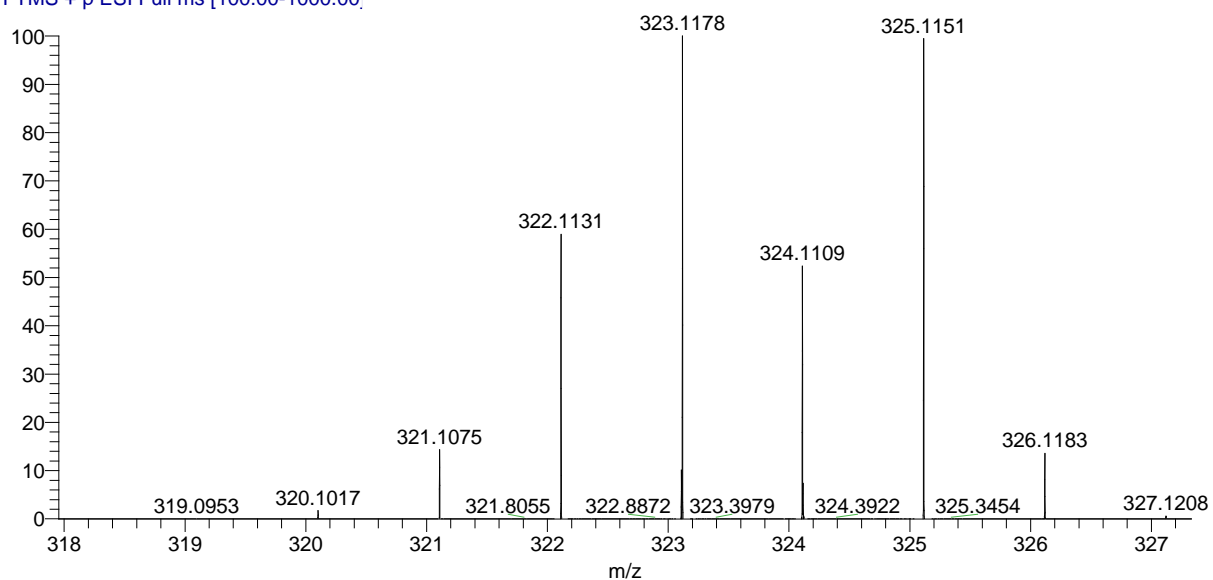

320.1017 ( $\text{C}_{13}\text{H}_{14}\text{D}_5\text{BrN}_2\text{O}_2 + \text{H}^+$ , 1%), 321.1075 ( $\text{C}_{13}\text{H}_{13}\text{D}_6\text{BrN}_2\text{O}_2 + \text{H}^+$ , 8%), 322.1131 ( $\text{C}_{13}\text{H}_{12}\text{D}_7\text{BrN}_2\text{O}_2 + \text{H}^+$ , 33%), 323.1178 ( $\text{C}_{13}\text{H}_{11}\text{D}_8\text{BrN}_2\text{O}_2 + \text{H}^+$ , 59%).

### 13. $^1\text{H}$ NMR, $^{13}\text{C}$ NMR and $^{19}\text{F}$ NMR spectra for products

#### $^1\text{H}$ NMR for 1b

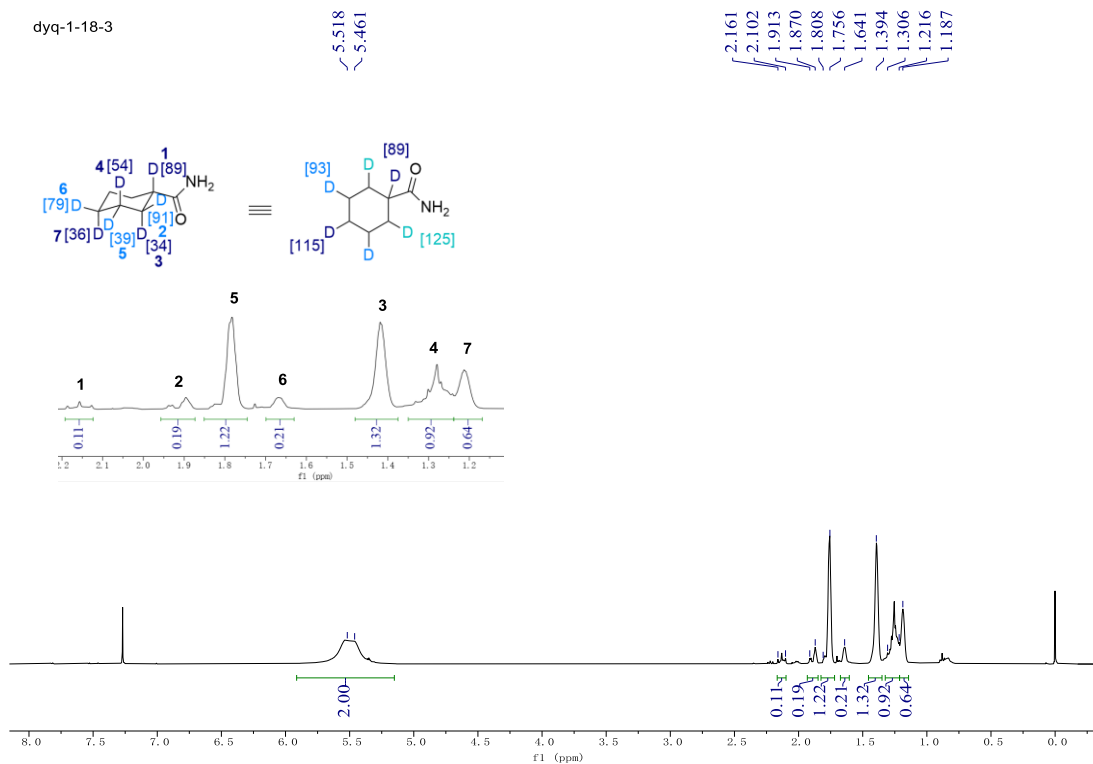

#### $^{13}\text{C}$ NMR for 1b

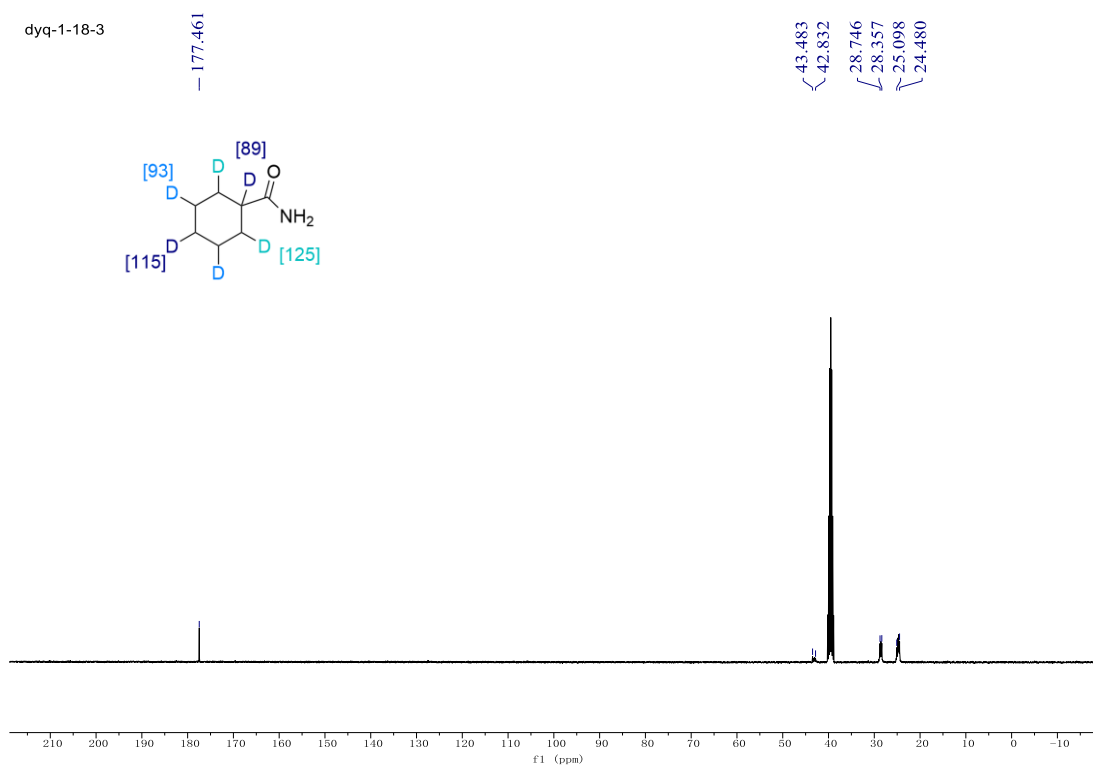

# <sup>1</sup>H NMR for 2b

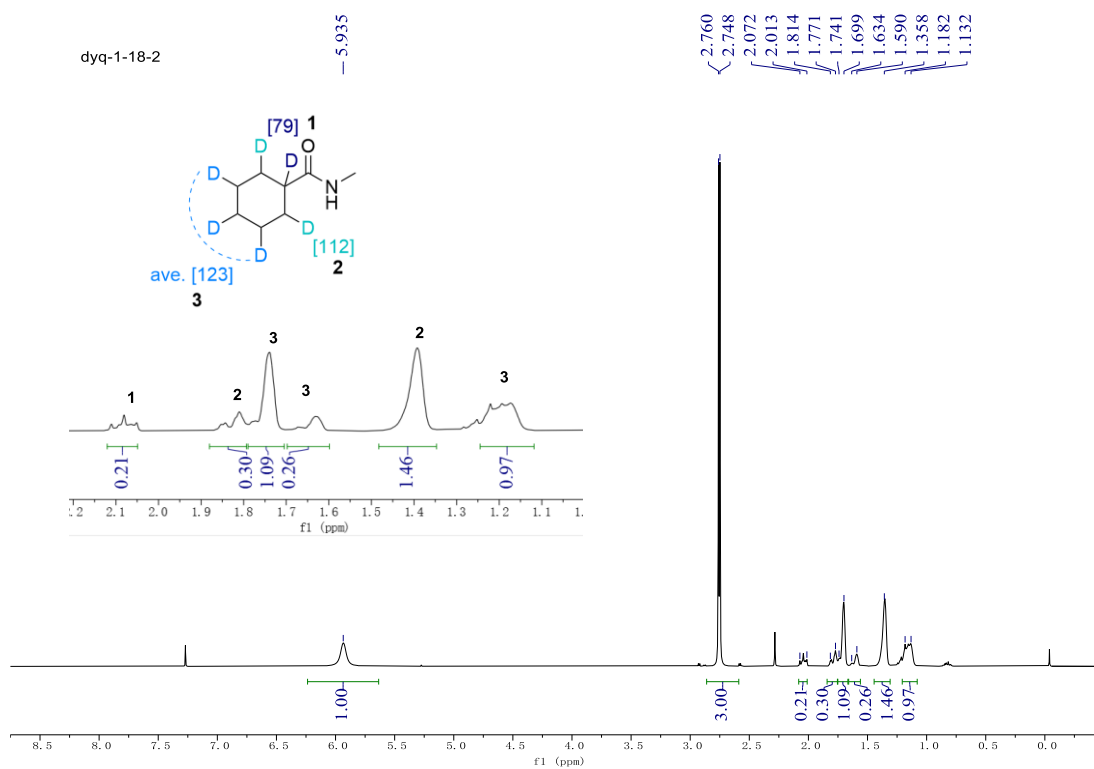

# <sup>13</sup>C NMR for 2b

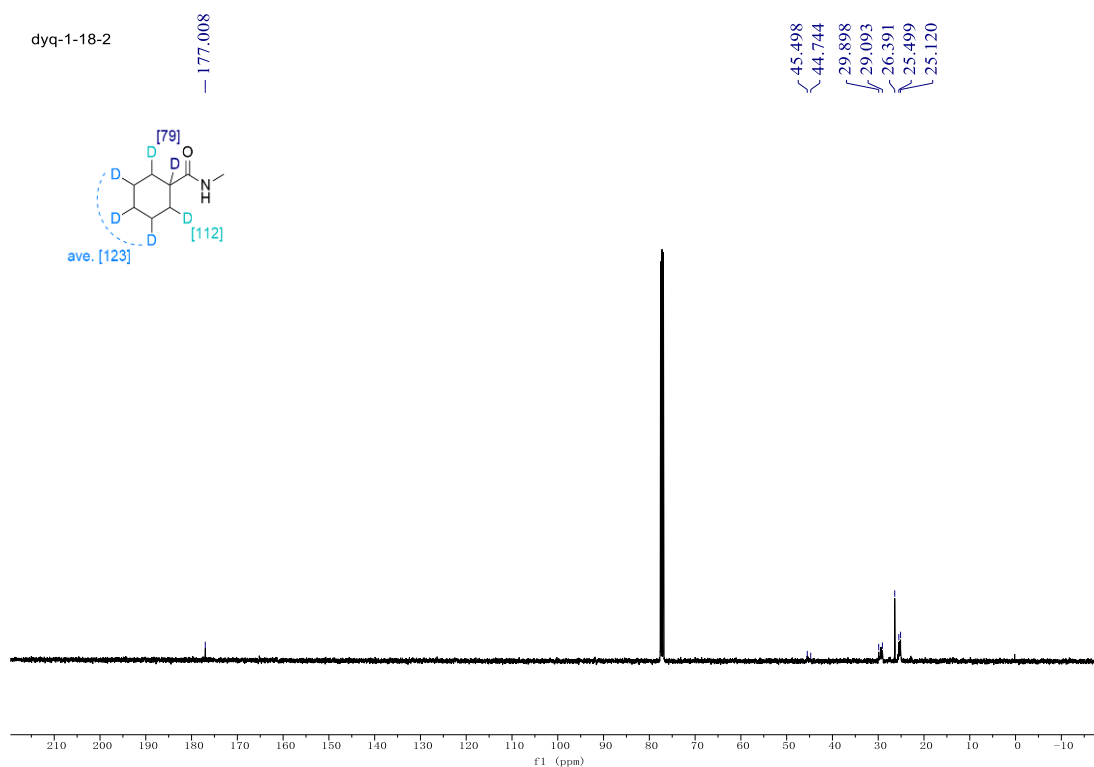

# <sup>1</sup>H NMR for 3b

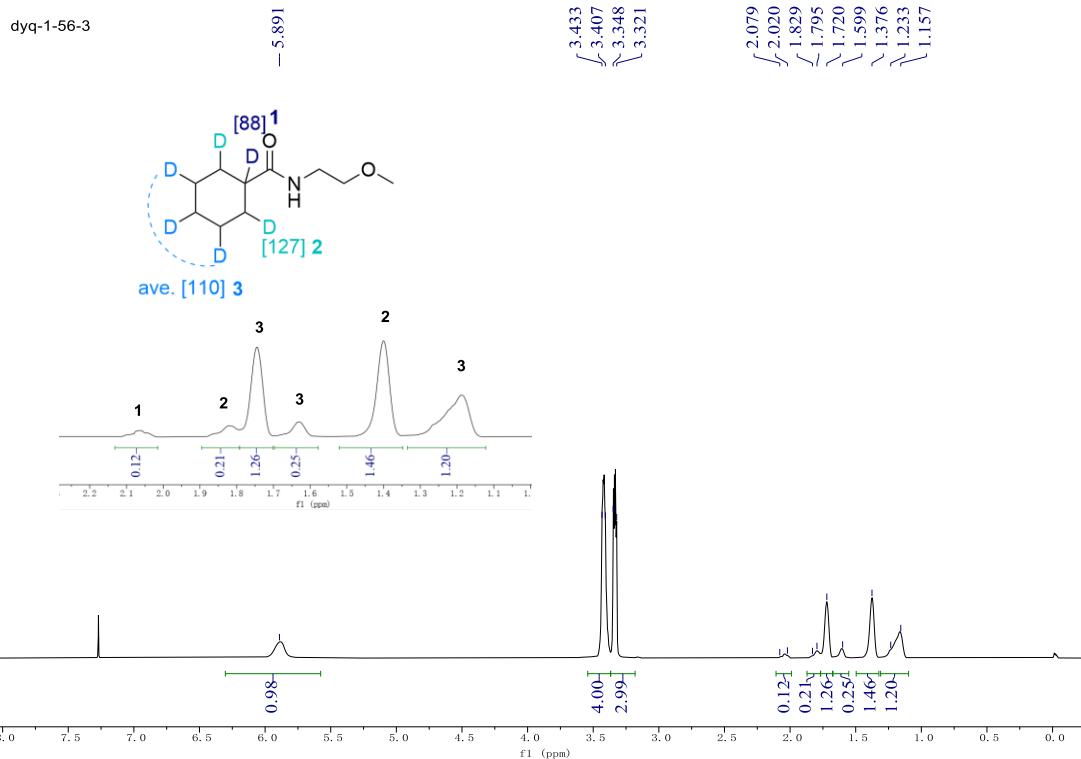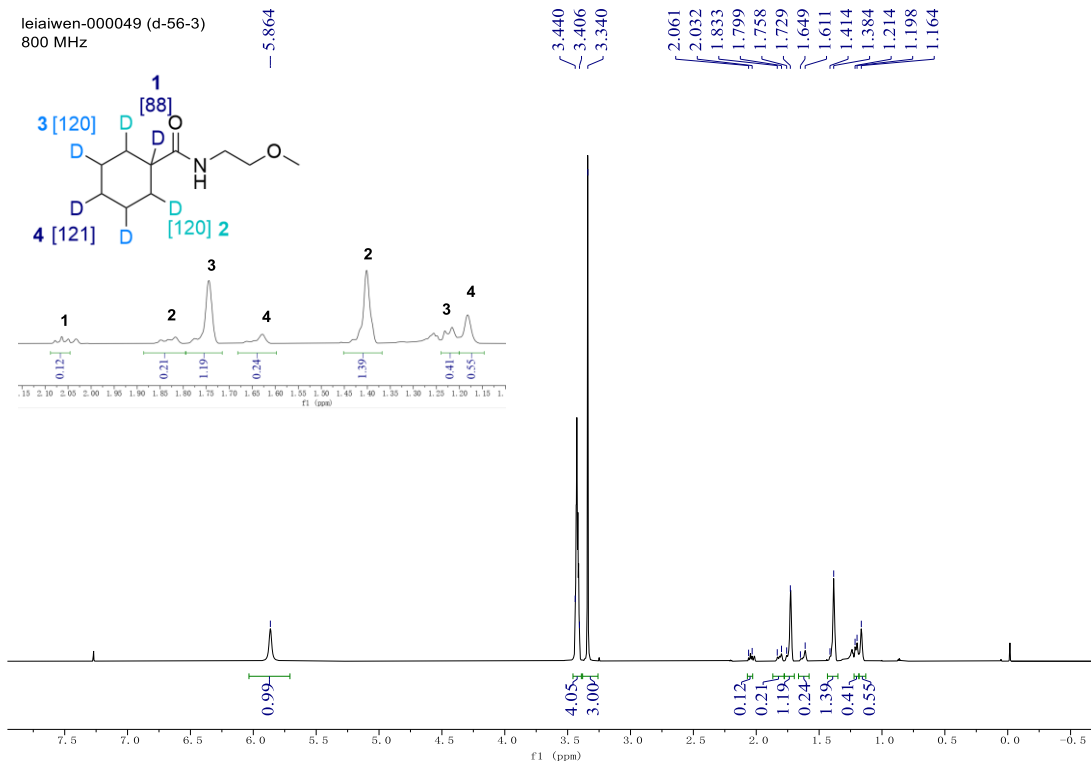

# <sup>13</sup>C NMR for 3b

lelaiwen-000049 (d-56-3)  
800 MHz

— 176.375

— 71.509

— 58.924

— 45.117

— 44.926

— 39.095

— 29.292

— 29.095

— 25.353

— 25.151

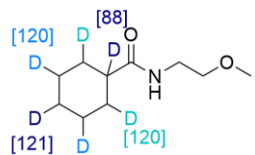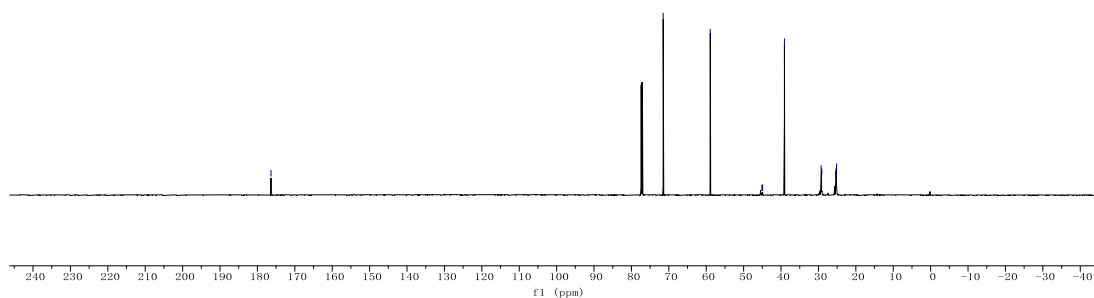

# <sup>1</sup>H NMR for 4b

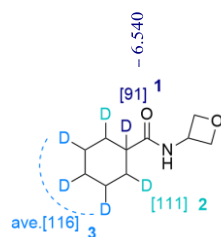

5.070  
4.984  
4.906  
4.889  
4.871  
4.483  
4.467  
4.451

2.098  
2.068  
2.039  
1.824  
1.782  
1.730  
1.616  
1.374  
1.199  
1.152

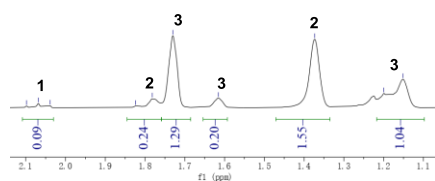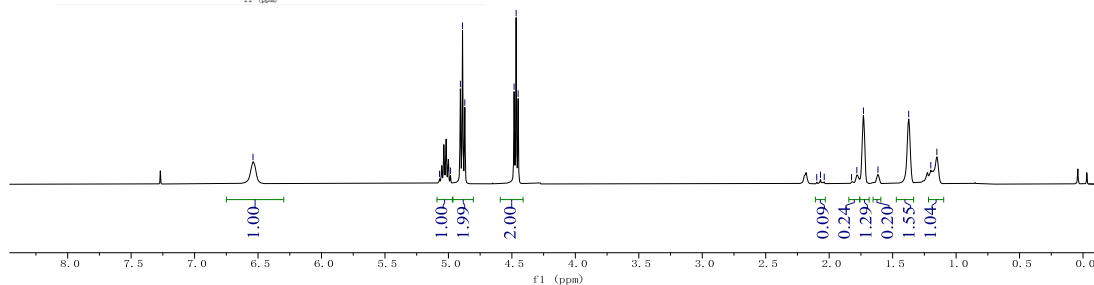

Leilaiwen-000001 (d-71-1)  
800 MHz

— 6.345

~ 5.038  
~ 4.911

— 4.472

2.090  
2.059  
1.826  
1.797  
1.744  
1.662  
1.628  
1.385  
1.205  
1.167

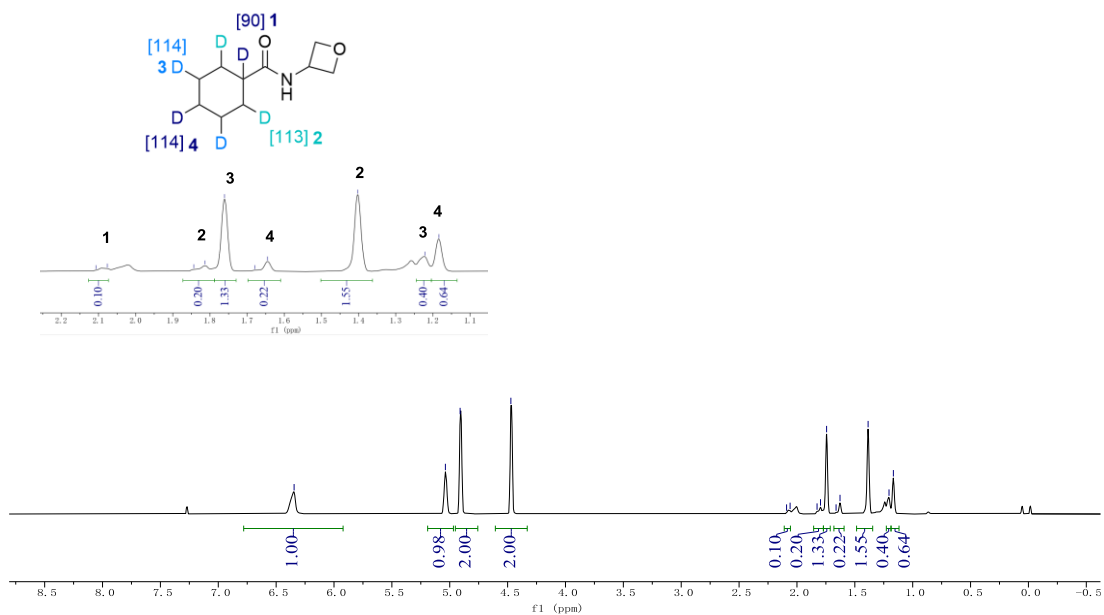

### <sup>13</sup>C NMR for 4b

dyq-1-71-1

— 176.177

— 78.728

44.834  
44.589  
44.462  
29.248  
28.856  
25.295  
24.920

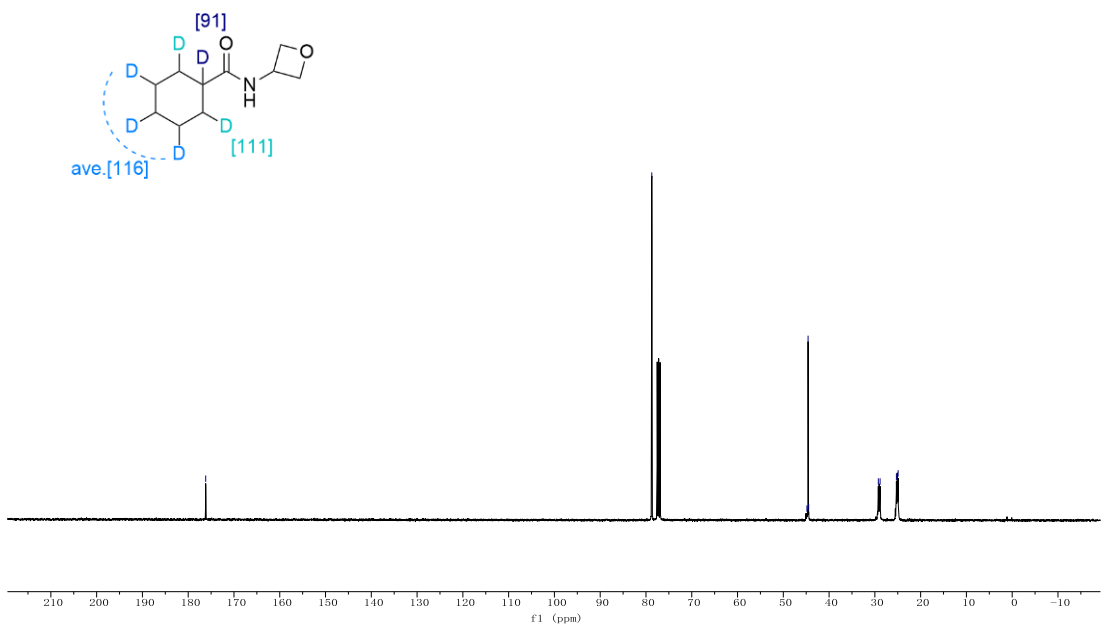

# <sup>1</sup>H NMR for 5b

dyq-1-70-1

5.332  
5.314  
4.152  
4.134  
4.116  
4.099  
3.942  
3.845  
2.243  
2.225  
2.205  
2.124  
1.746  
1.672  
1.637  
1.539  
1.439  
1.383  
1.281  
1.184

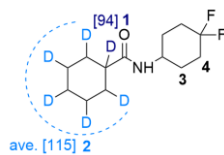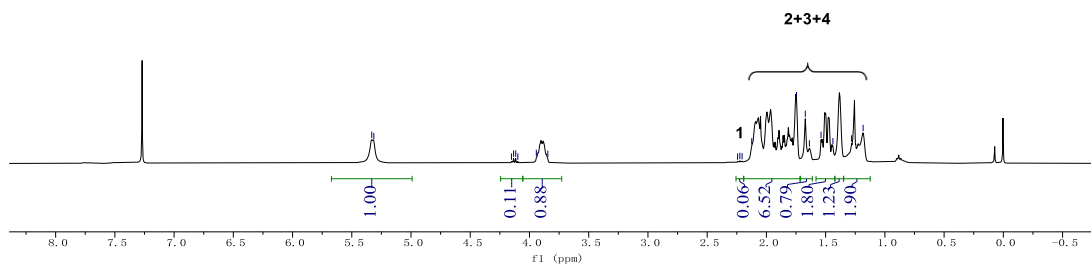

# <sup>13</sup>C NMR for 5b

dyq-1-70-1

175.857  
125.111  
122.728  
120.316  
46.037  
32.702  
32.455  
32.210  
29.455  
29.067  
28.986  
28.892  
25.425  
25.048

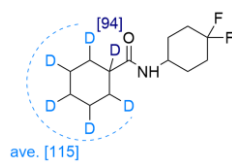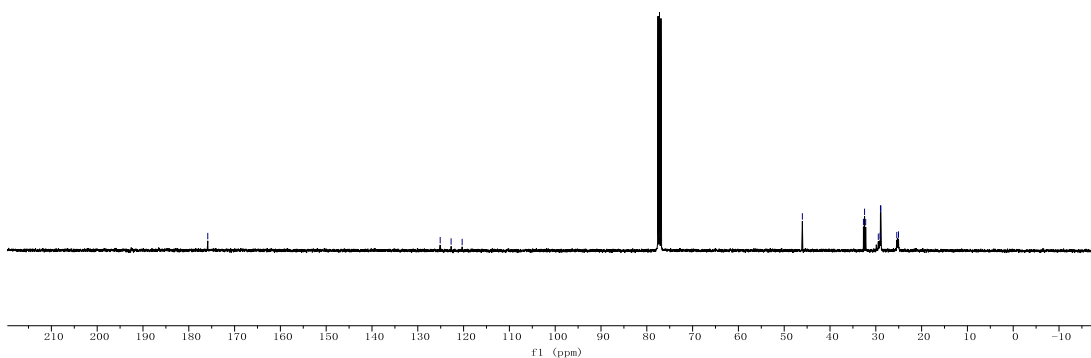

# <sup>19</sup>F NMR for 5b

dyq-1-70-1

-94.476  
-95.107  
-101.081  
-101.711

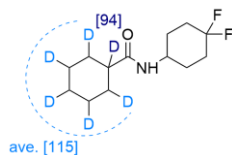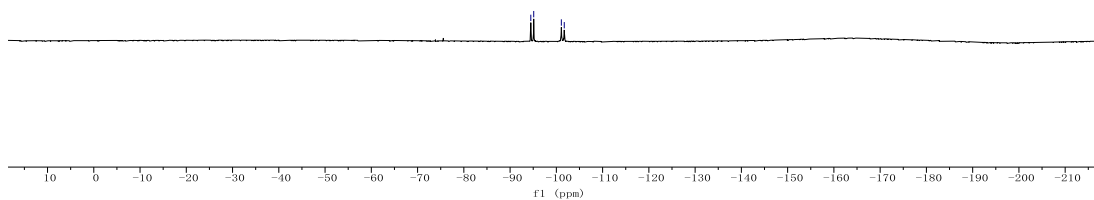

# <sup>1</sup>H NMR for 6b

dyq-1-56-2

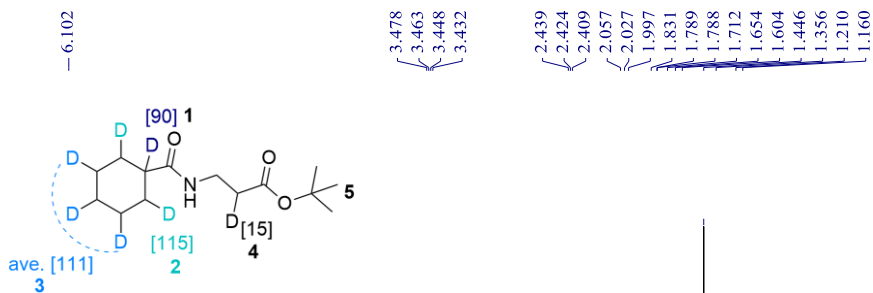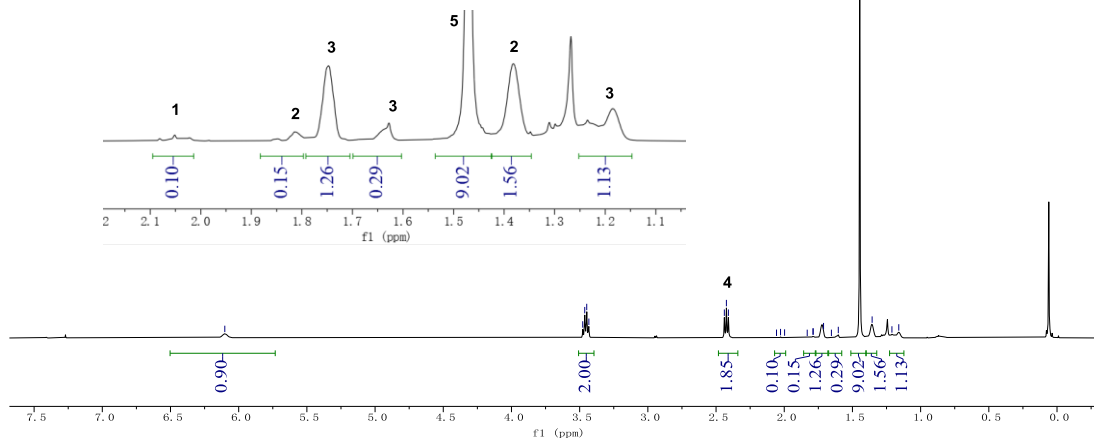



# <sup>13</sup>C NMR for 6b

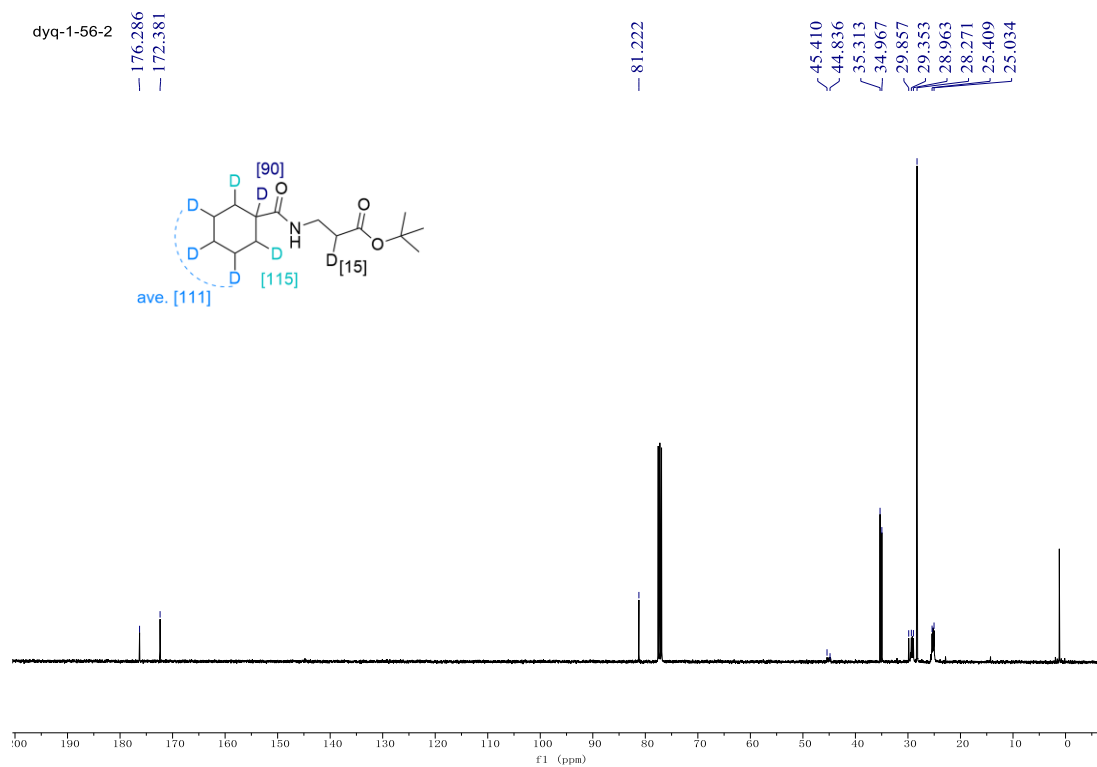

# <sup>1</sup>H NMR for 7b

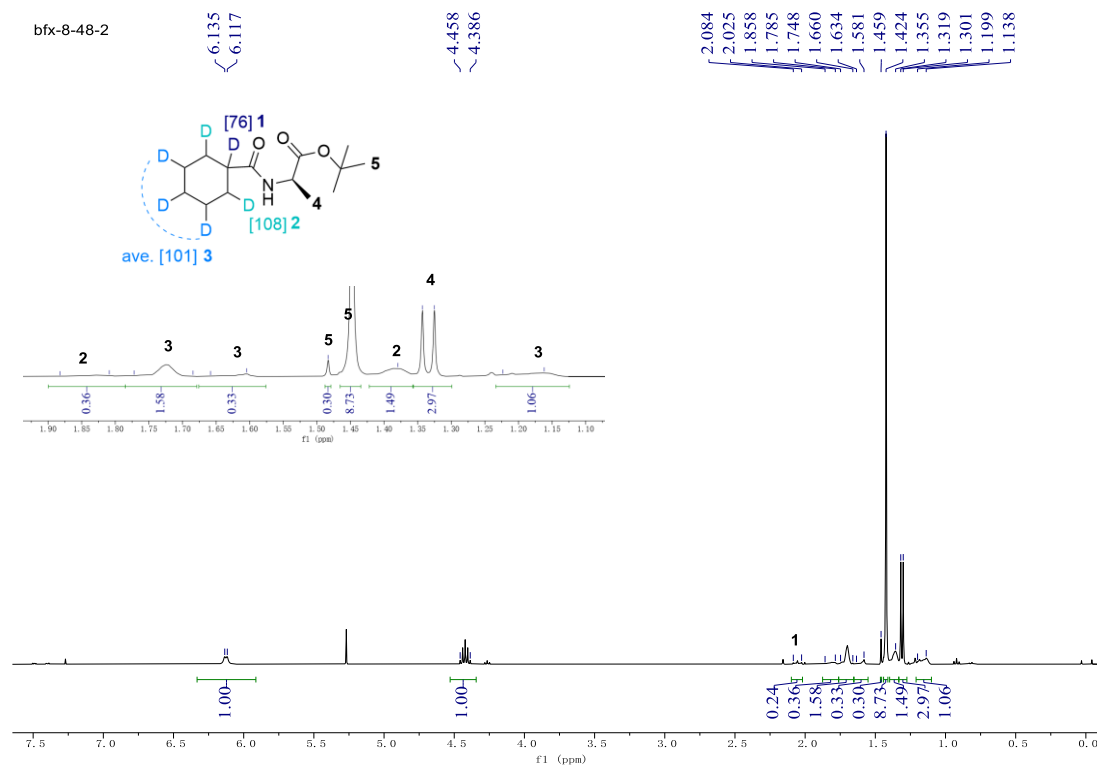

lelaiwen-000051 (b-8-48-2)  
800 MHz

6.082  
6.081

4.457  
4.421

2.082  
2.053  
1.860  
1.802  
1.751  
1.719  
1.641  
1.602  
1.478  
1.444  
1.412  
1.362  
1.334  
1.325  
1.211  
1.196  
1.155

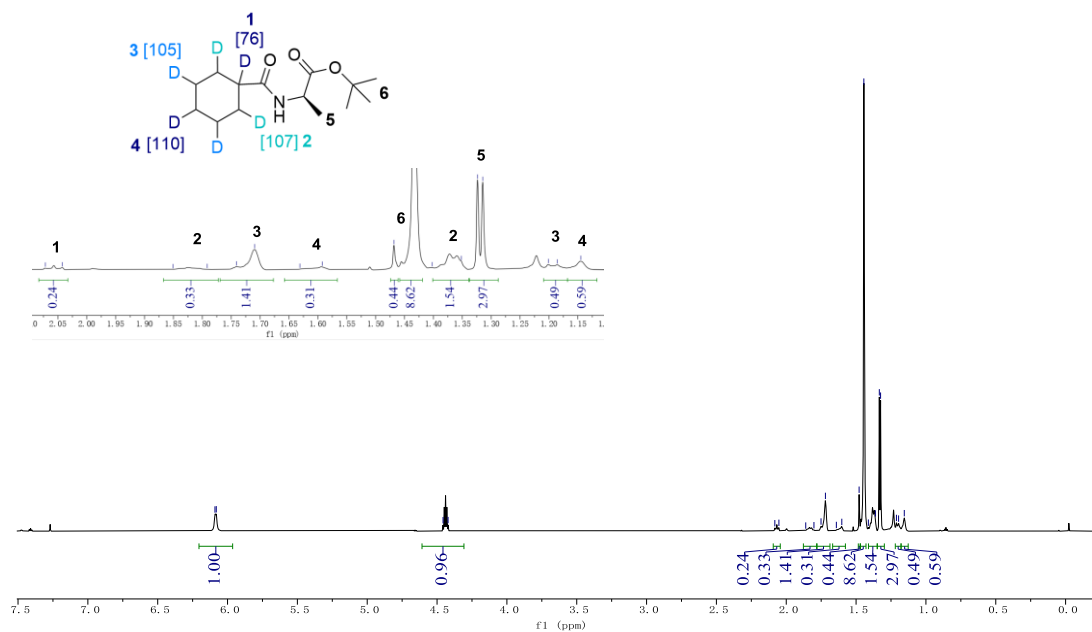

### <sup>13</sup>C NMR for 7b

lelaiwen-000051 (b-8-48-2)  
800 MHz

175.612  
172.801

82.009

48.413  
44.897  
44.707  
29.288  
28.989  
28.120  
25.288  
25.100  
18.961

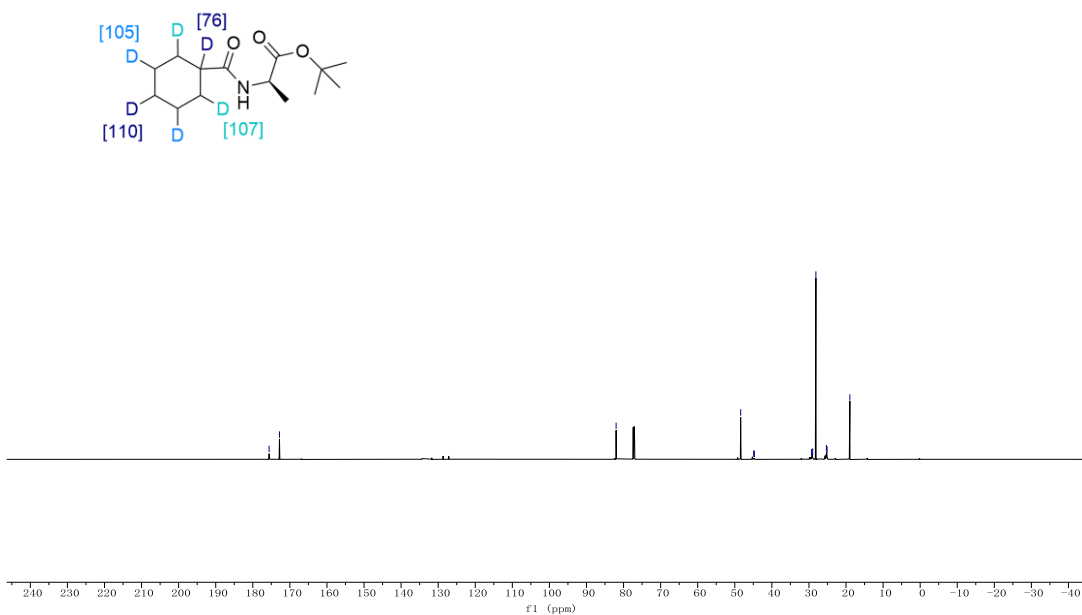

# <sup>1</sup>H NMR for 8b

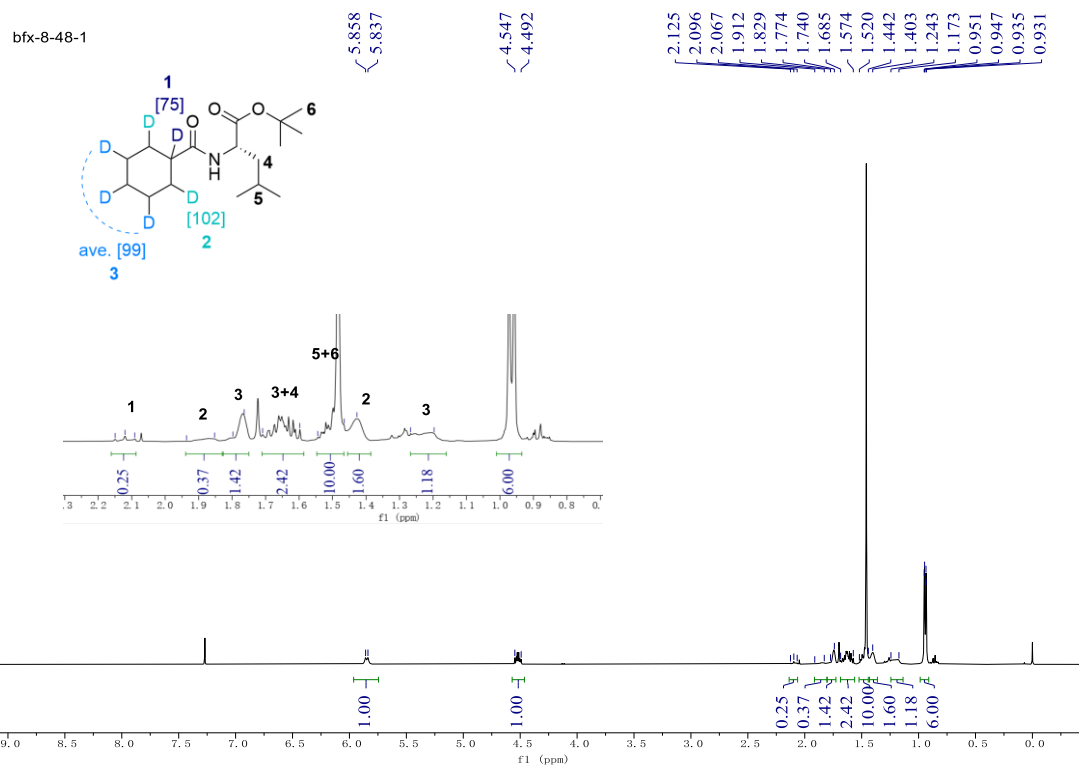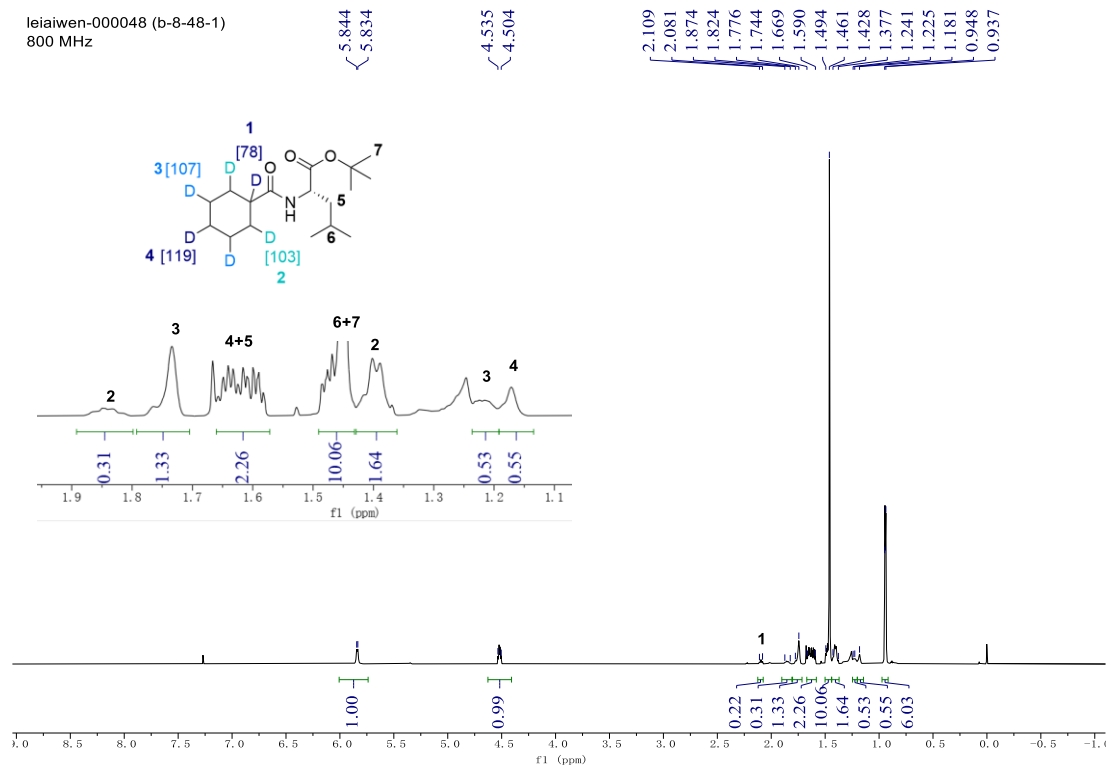

# <sup>13</sup>C NMR for 8b

lelaiwen-000048 (b-8-48-1)  
800 MHz

~ 175.862  
~ 172.811

~ 81.983

~ 51.142

~ 42.356

~ 29.990

~ 29.698

~ 29.412

~ 28.969

~ 28.216

~ 25.769

~ 25.647

~ 25.278

~ 25.201

~ 23.054

~ 22.433

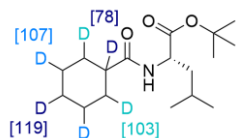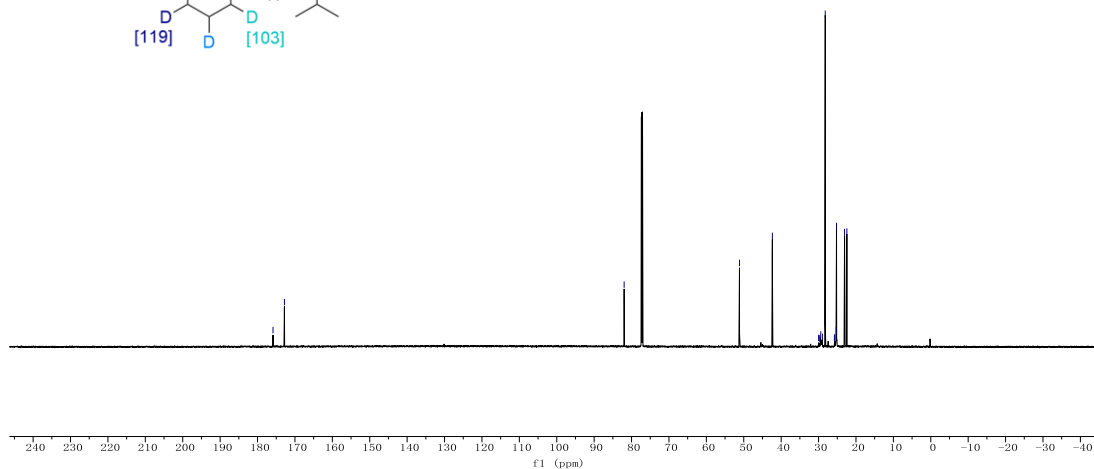

# <sup>1</sup>H NMR for 9b

dyq-1-147-2

~ 2.995

~ 2.882

~ 2.453

~ 2.424

~ 2.394

~ 1.708

~ 1.633

~ 1.592

~ 1.410

~ 1.185

~ 1.156

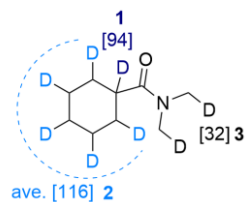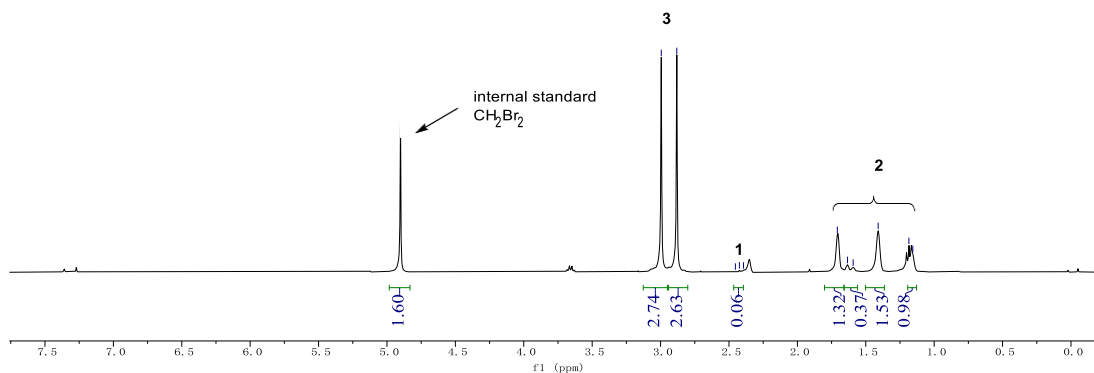

# <sup>13</sup>C NMR for 9b

dyq-1-147-2

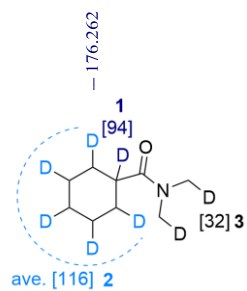

40.197  
40.102  
40.008  
37.124  
35.561  
28.719  
28.622  
28.523  
25.393  
25.298  
25.202

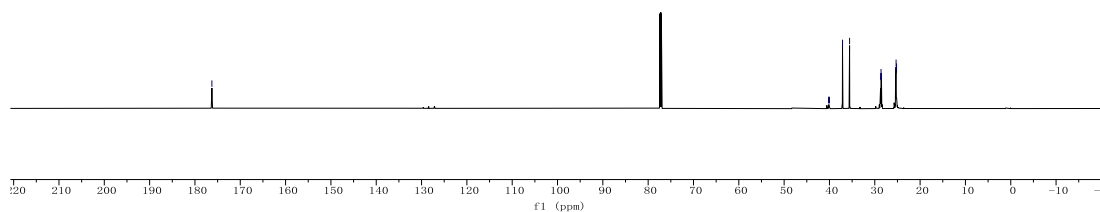

# <sup>1</sup>H NMR for 10b

dyq-1-17-1

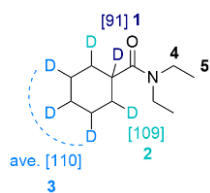

3.374  
3.275

2.401  
2.342  
1.899  
1.745  
1.690  
1.644  
1.511  
1.256  
1.156  
1.100  
1.064

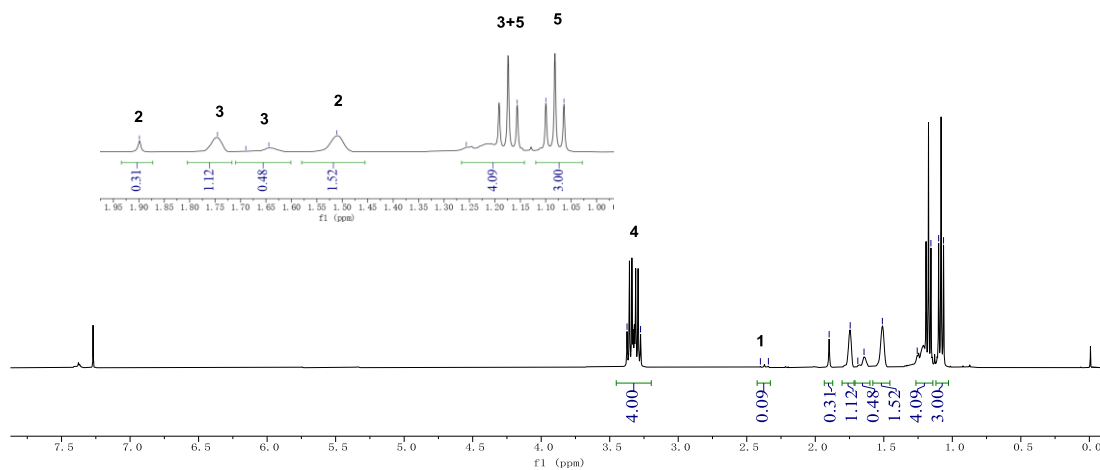

**<sup>13</sup>C NMR for 10b**

dyq-1-17-1<sup>738</sup>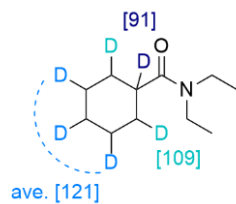

$\sim 41.828$   
 $\sim 40.179$   
 $\sim 29.365$   
 $\sim 28.981$   
 $\sim 25.609$   
 $\sim 25.236$   
 $\sim 15.208$   
 $\sim 13.328$

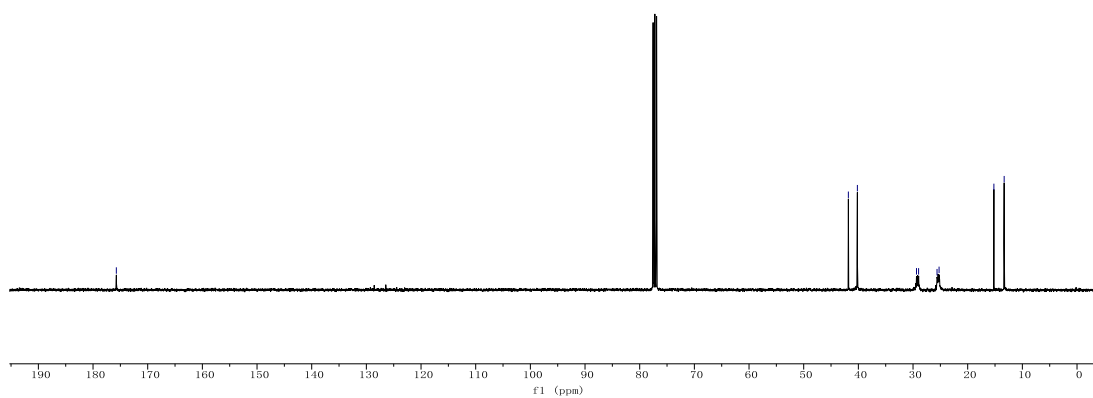

### <sup>1</sup>H NMR for 11b

dyq-1-126-2

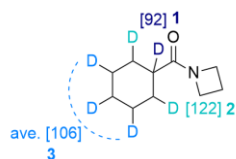

4.147  
4.128  
4.109  
3.989  
3.969  
3.950

2.267  
2.190  
2.107  
2.049  
2.020  
1.961  
1.717  
1.658  
1.597  
1.410  
1.171

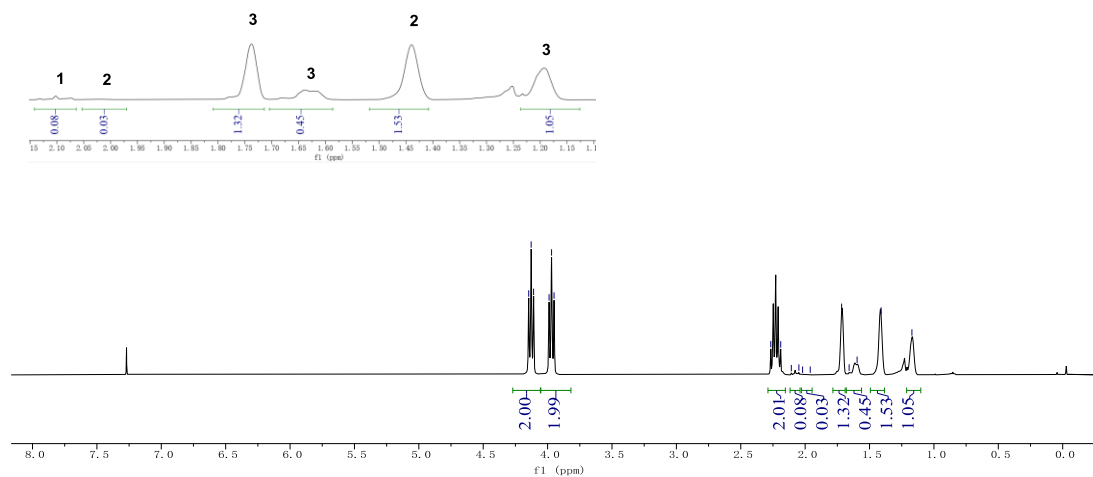

# <sup>13</sup>C NMR for 11b

dyq-1-126-2

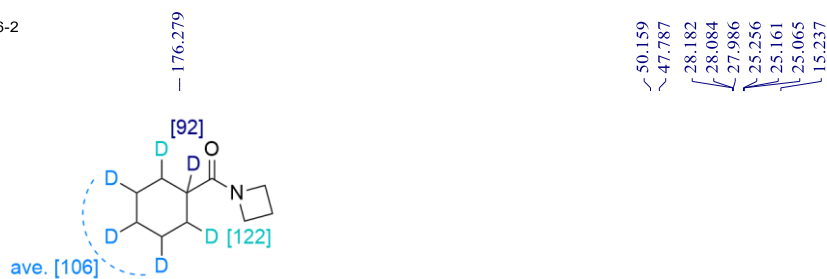

50.159  
47.787  
28.182  
28.084  
27.986  
25.256  
25.161  
25.065  
15.237

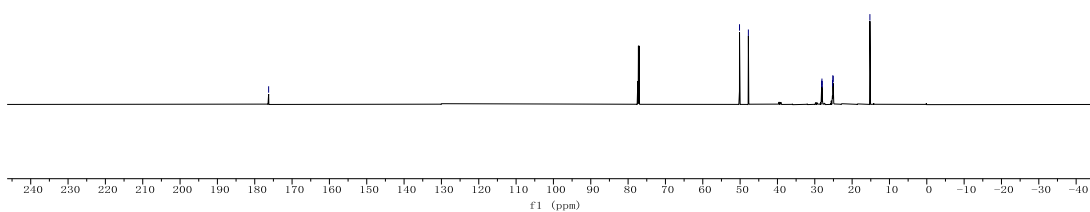

# <sup>1</sup>H NMR for 12b

dyq-1-70-2

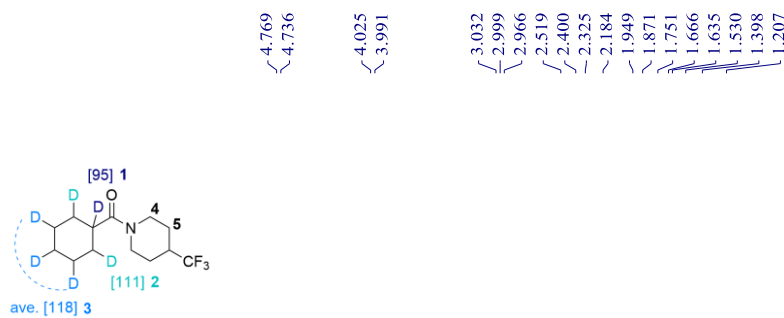

4.769  
4.736  
4.025  
3.991  
3.032  
2.999  
2.966  
2.519  
2.400  
2.325  
2.184  
1.949  
1.871  
1.751  
1.666  
1.635  
1.530  
1.398  
1.207

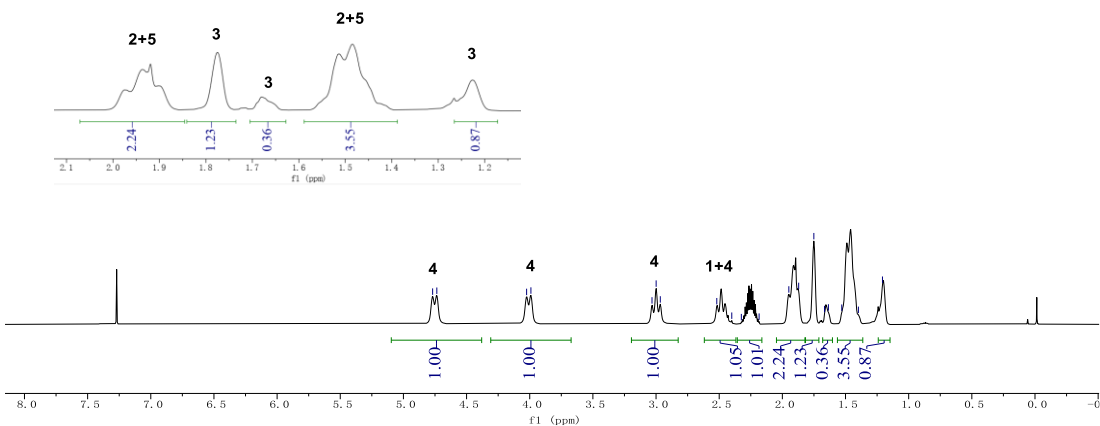

### <sup>13</sup>C NMR for 12b

dyq-1-70-2

— 174.787

131.289  
128.525  
125.759  
122.993

44.342  
41.277  
41.003  
40.729  
40.646  
40.456  
40.204  
39.822  
29.463  
28.496  
25.641  
25.513  
25.136  
24.479

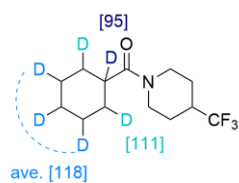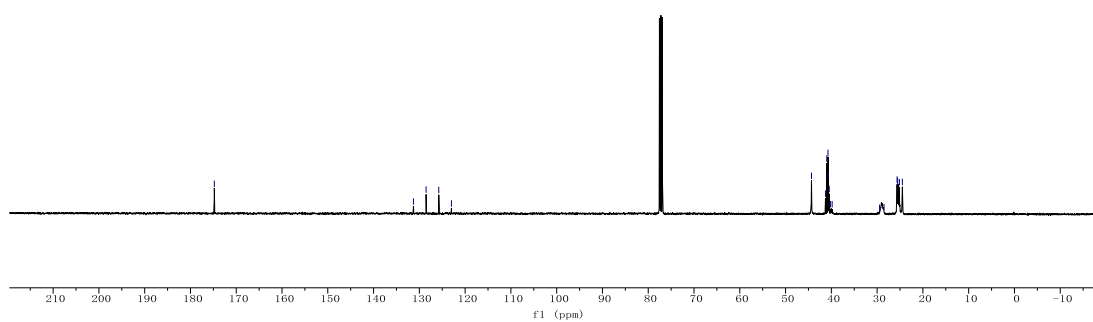

### <sup>19</sup>F NMR for 12b

dyq-1-70-2

— -73.893

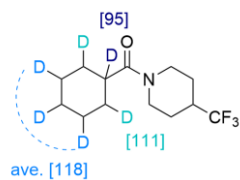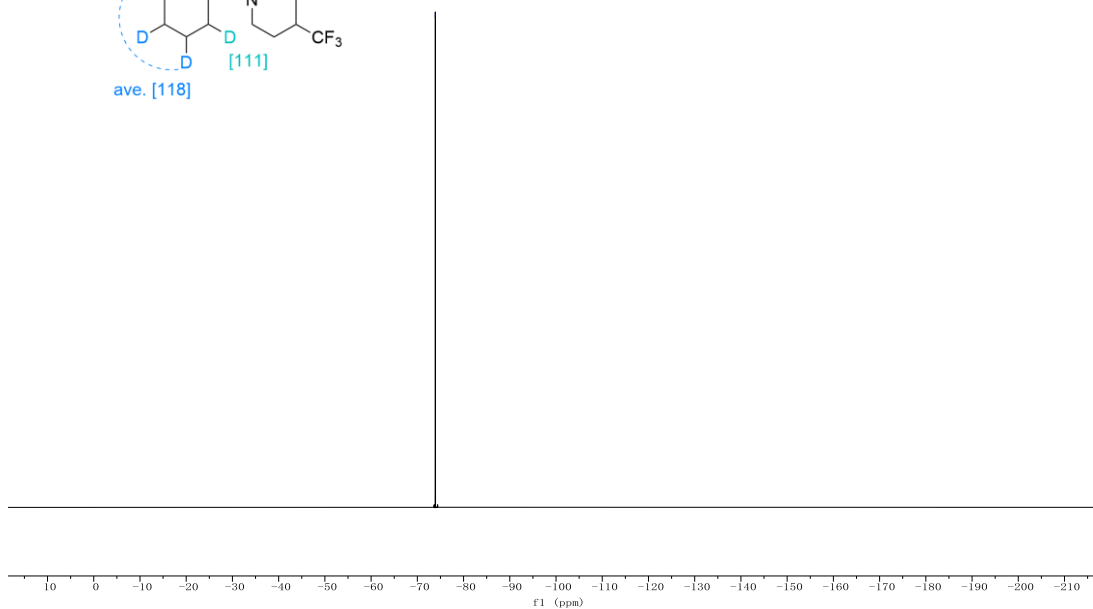



# <sup>1</sup>H NMR for 13b

dyq-1-16-4

— 3.655  
— 3.468

~ 2.424  
~ 2.366  
~ 2.019  
~ 1.897  
~ 1.749  
~ 1.700  
~ 1.633  
~ 1.480  
~ 1.201

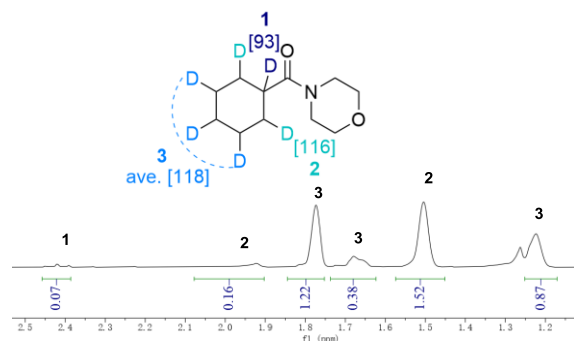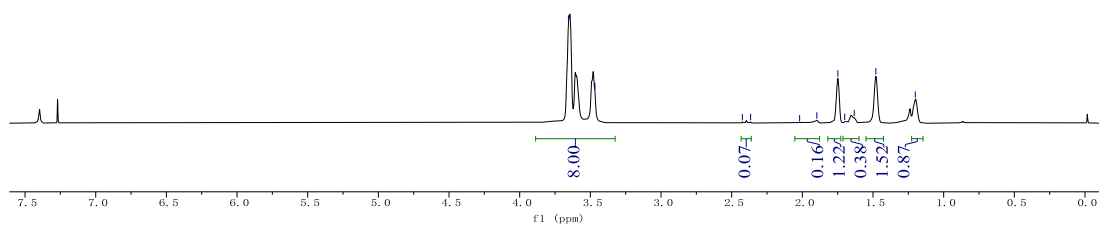

# <sup>13</sup>C NMR for 13b

dyq-1-16-4

— 174.920

~ 67.174  
~ 67.036

~ 46.000  
~ 42.002  
~ 39.892  
~ 28.801  
~ 25.277

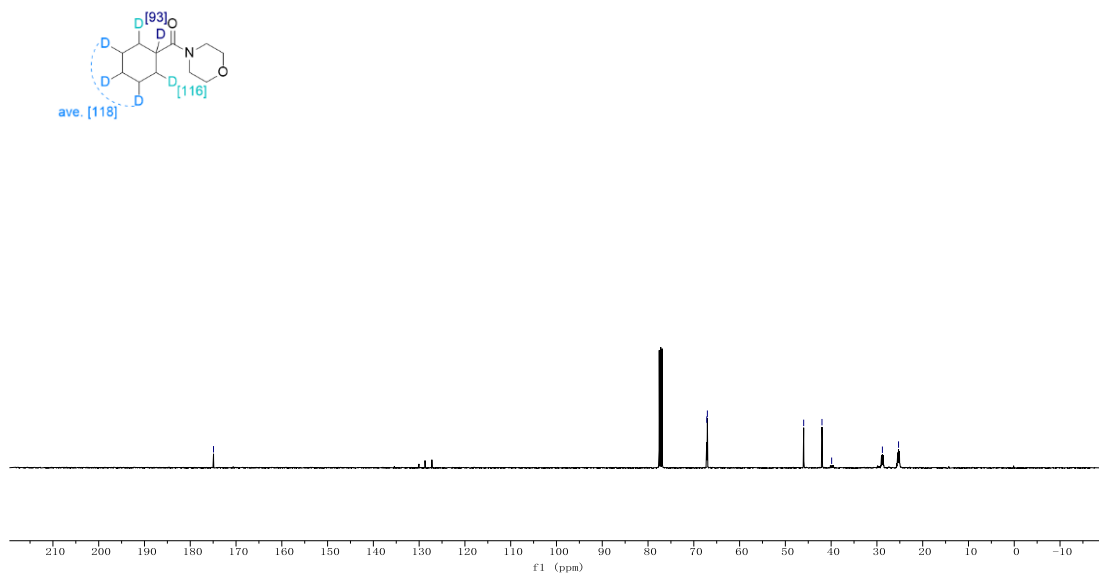

# <sup>1</sup>H NMR for 14b

dyq-1-17-2

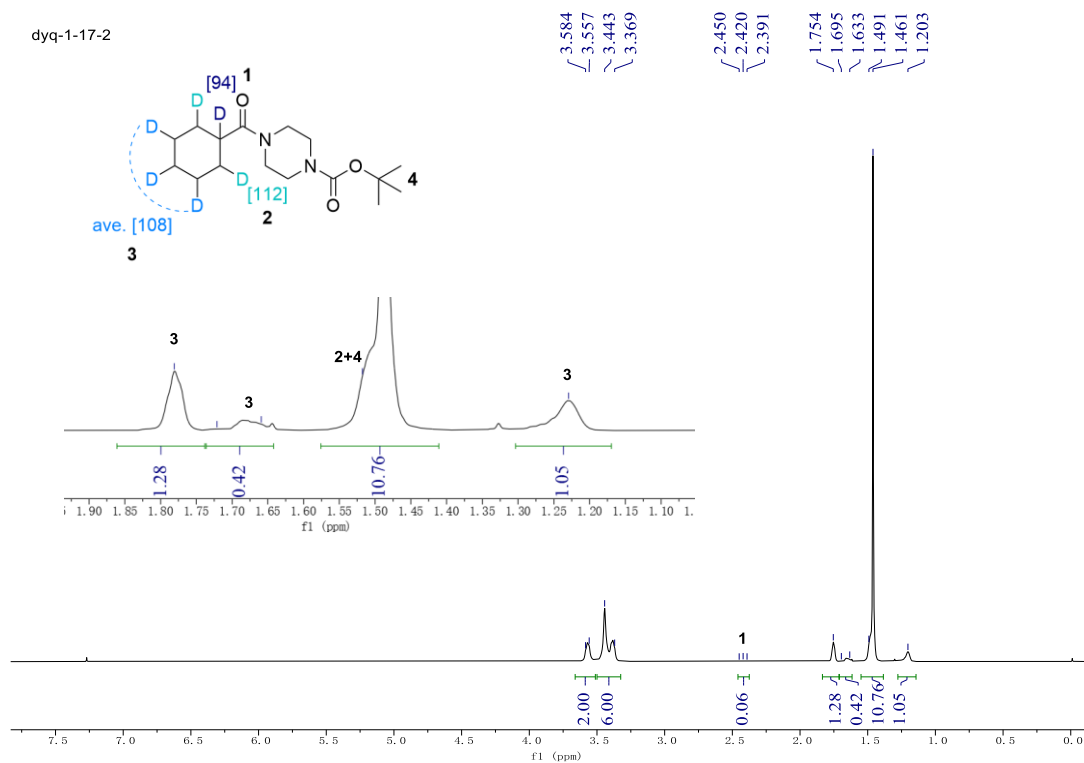

# <sup>13</sup>C NMR for 14b

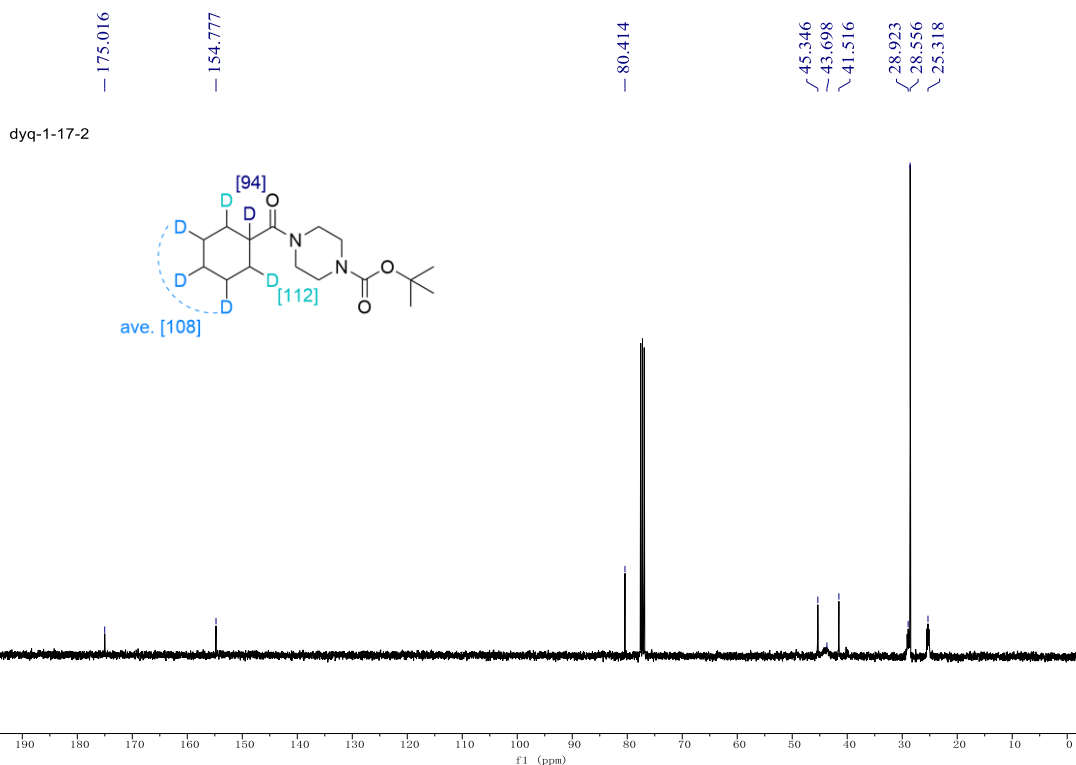

# <sup>1</sup>H NMR for 15b

dyq-1-118-4

— 3.855  
 ~ 3.405  
 ~ 3.263  
 ~ 2.981  
 ~ 2.711  
 ~ 2.534  
 ~ 2.291  
 ~ 2.262  
 ~ 2.233  
 — 1.861  
 ~ 1.530  
 ~ 1.450  
 ~ 1.386  
 ~ 1.178

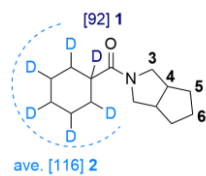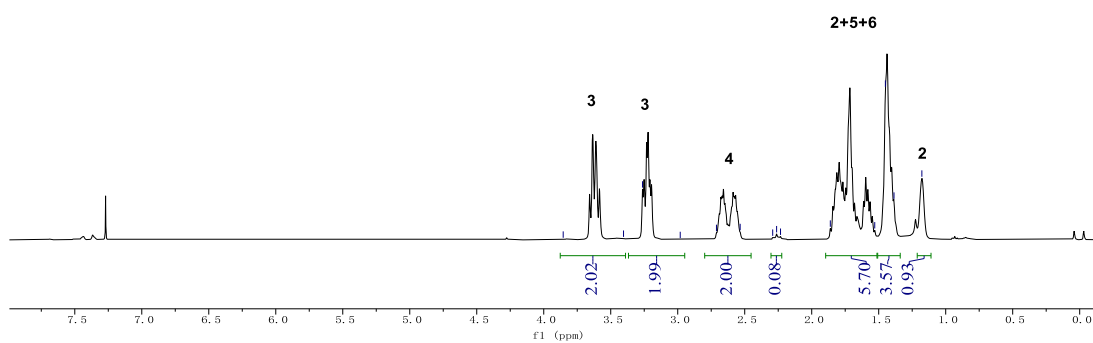

lelaiwen-000052 (d-118-4)  
 800 MHz

~ 3.666  
 ~ 3.620  
 ~ 3.276  
 ~ 3.225  
 ~ 2.709  
 ~ 2.666  
 ~ 2.621  
 ~ 2.577  
 ~ 2.296  
 ~ 2.268  
 ~ 1.933  
 ~ 1.923  
 ~ 1.860  
 ~ 1.789  
 ~ 1.762  
 ~ 1.673  
 ~ 1.629  
 ~ 1.578  
 ~ 1.468  
 ~ 1.412  
 ~ 1.202

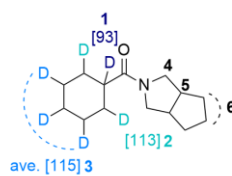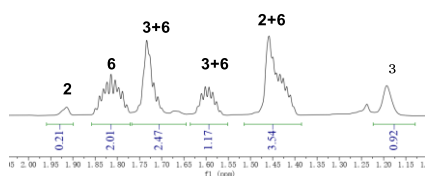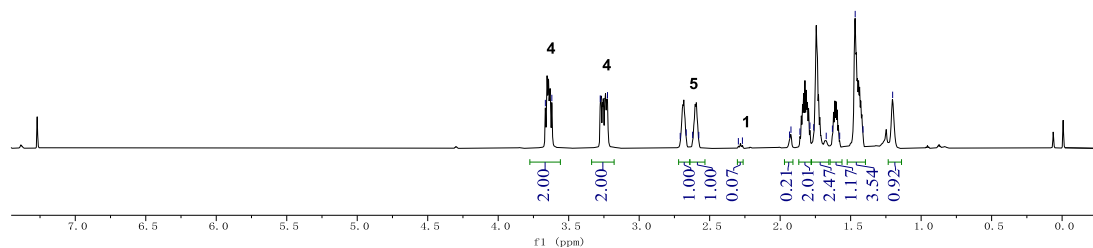

# <sup>13</sup>C NMR for 15b

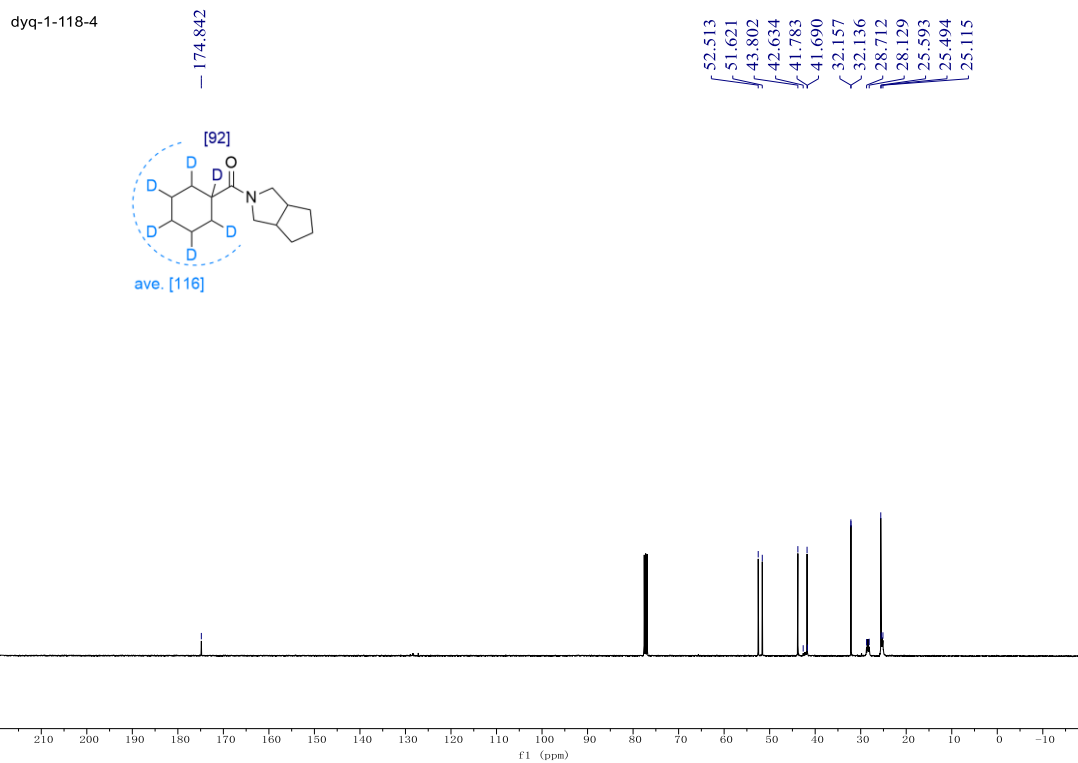

# <sup>1</sup>H NMR for 16b

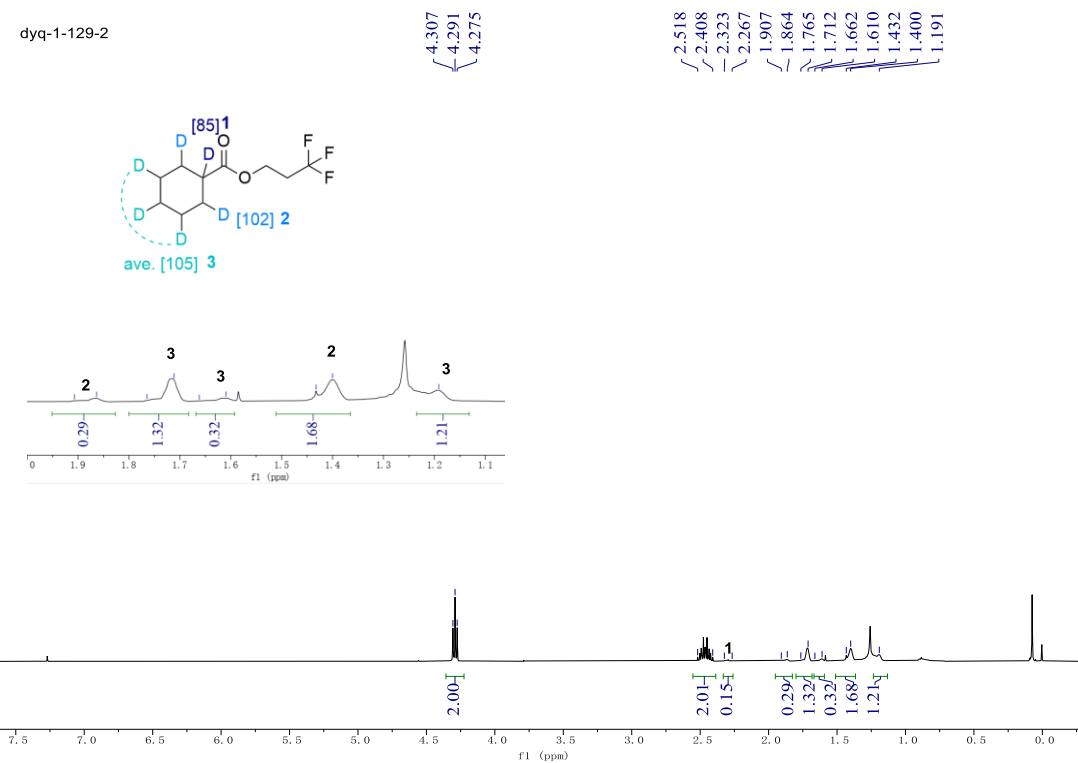

# **<sup>13</sup>C NMR for 16b**

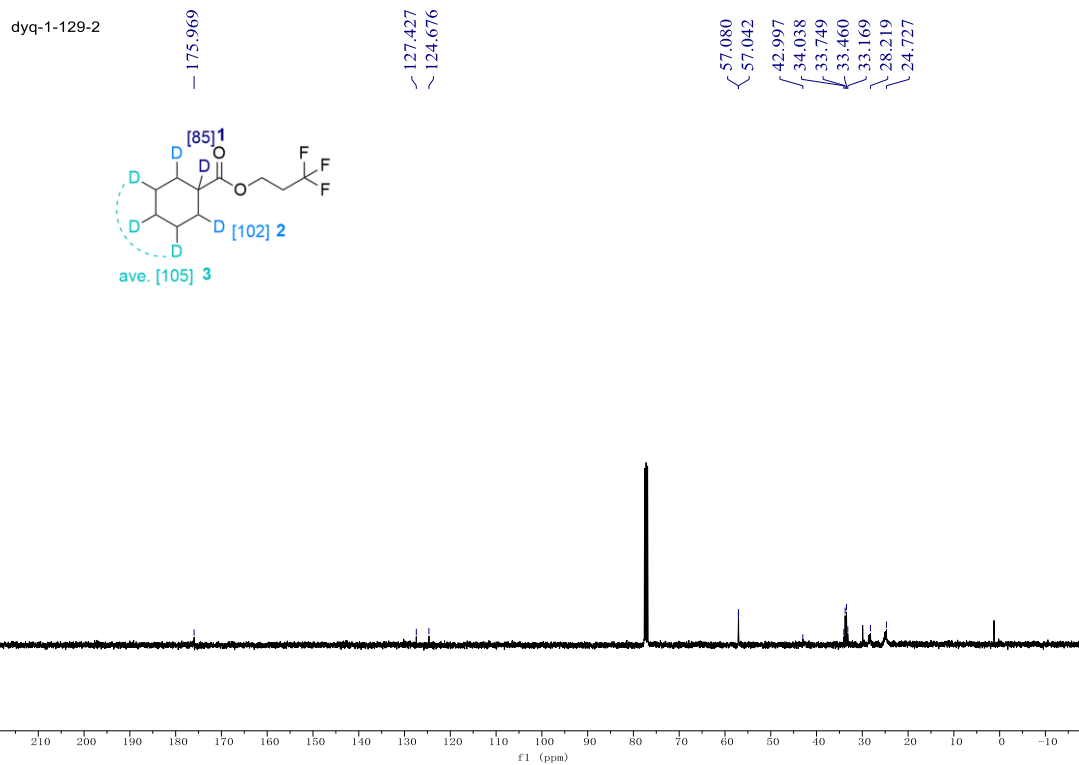

# **<sup>1</sup>H NMR for 17b**

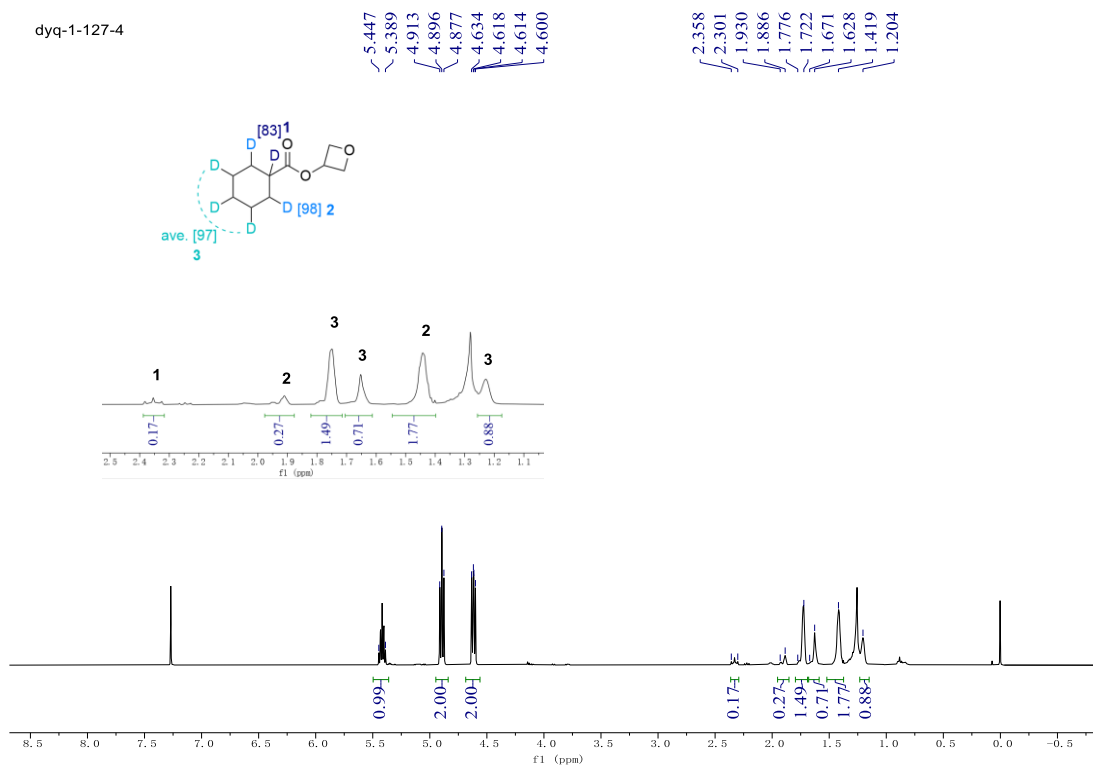

# <sup>13</sup>C NMR for 17b

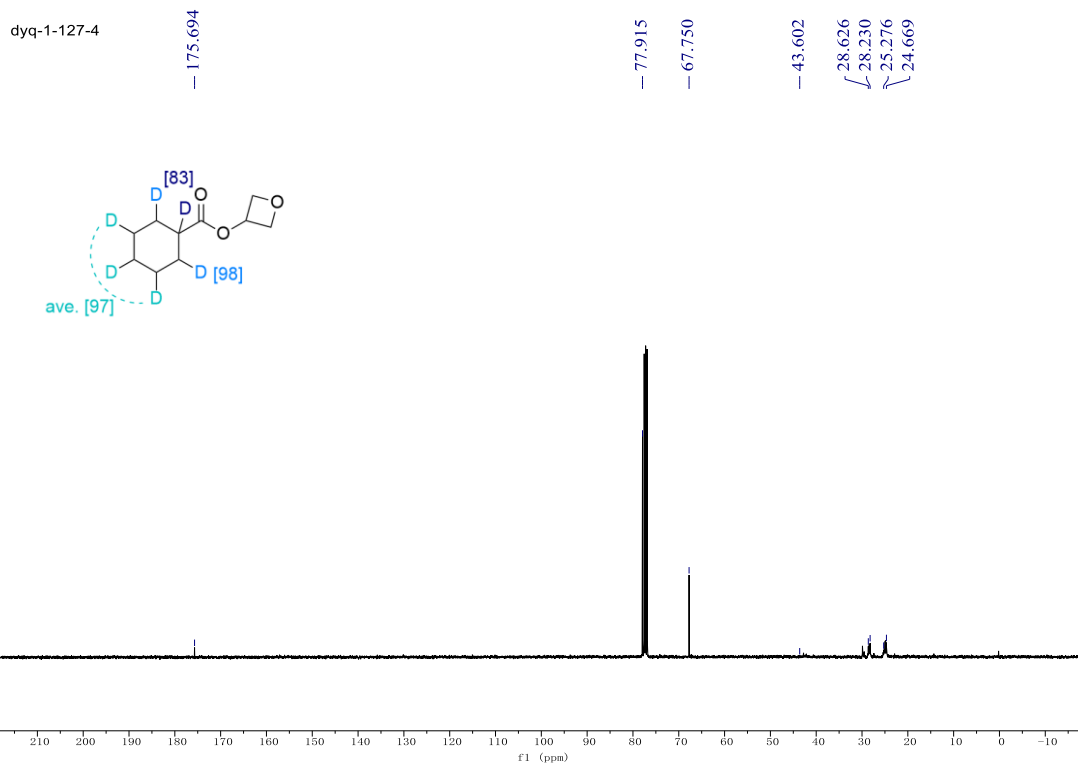

# <sup>1</sup>H NMR for 18b

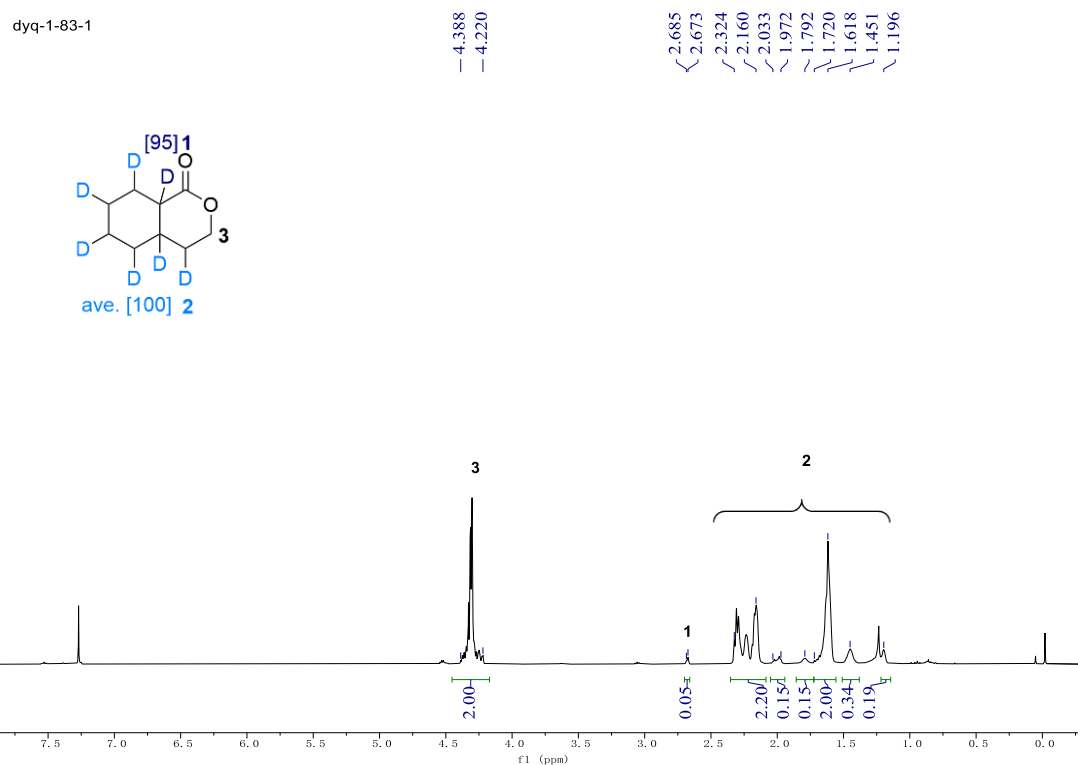

### <sup>13</sup>C NMR for 18b

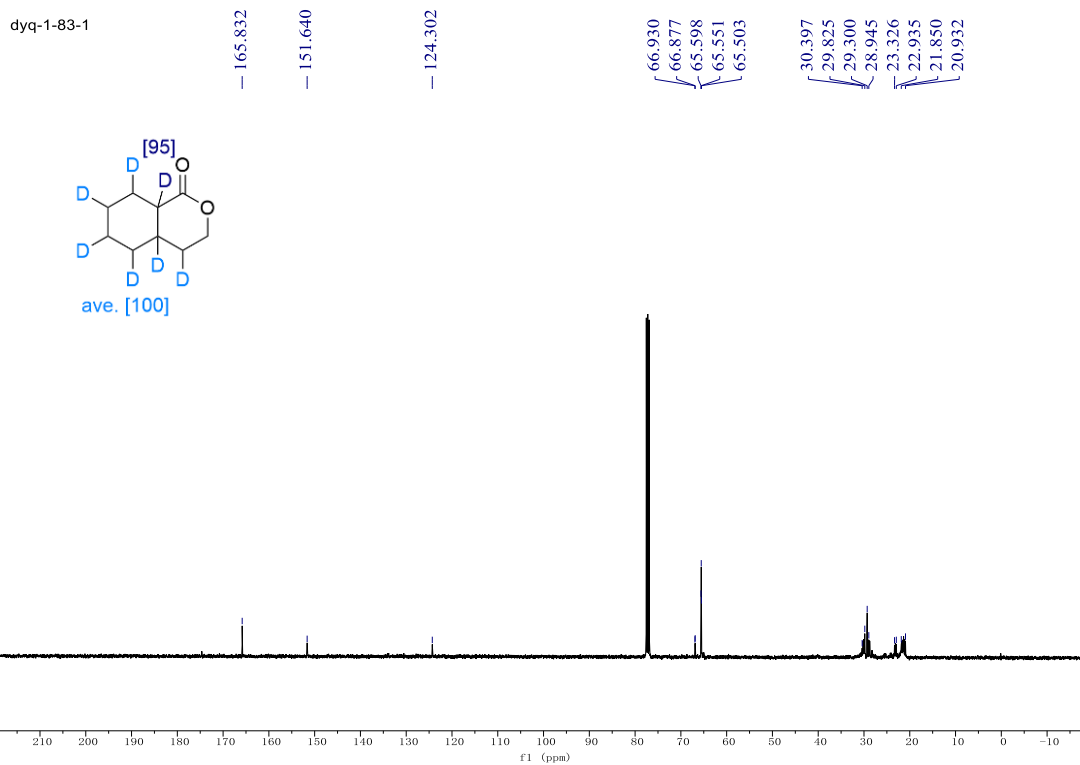

### <sup>1</sup>H NMR for 19b

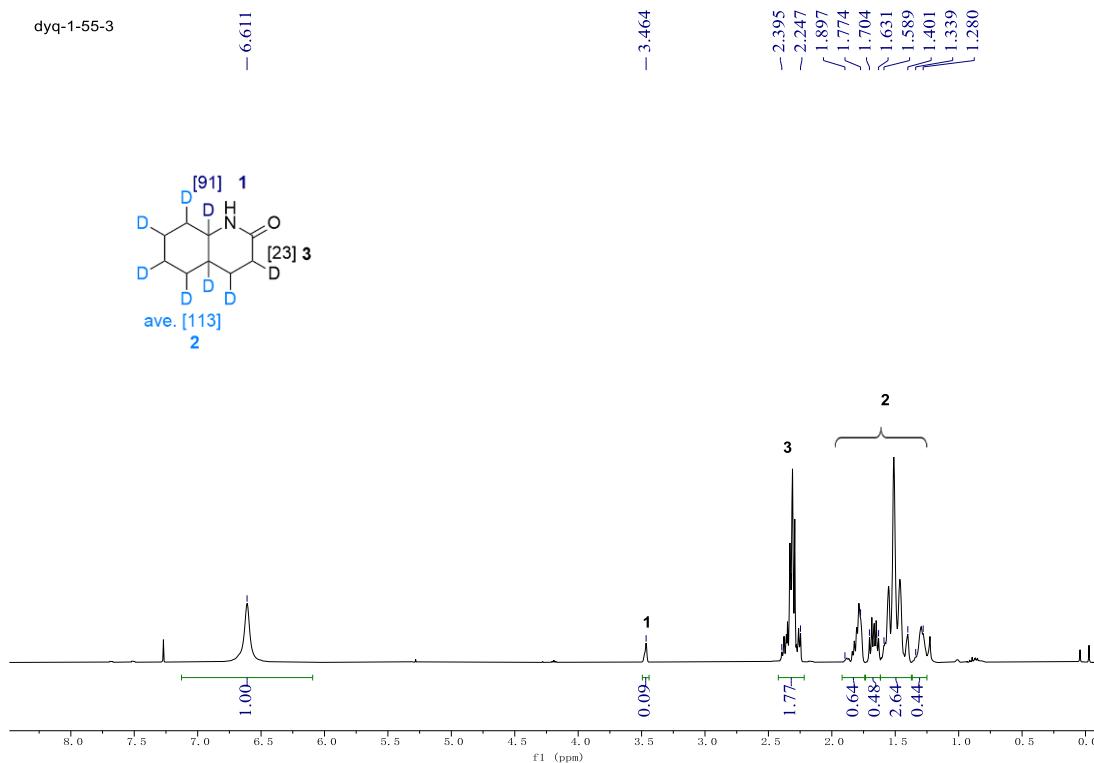

# <sup>13</sup>C NMR for 19b

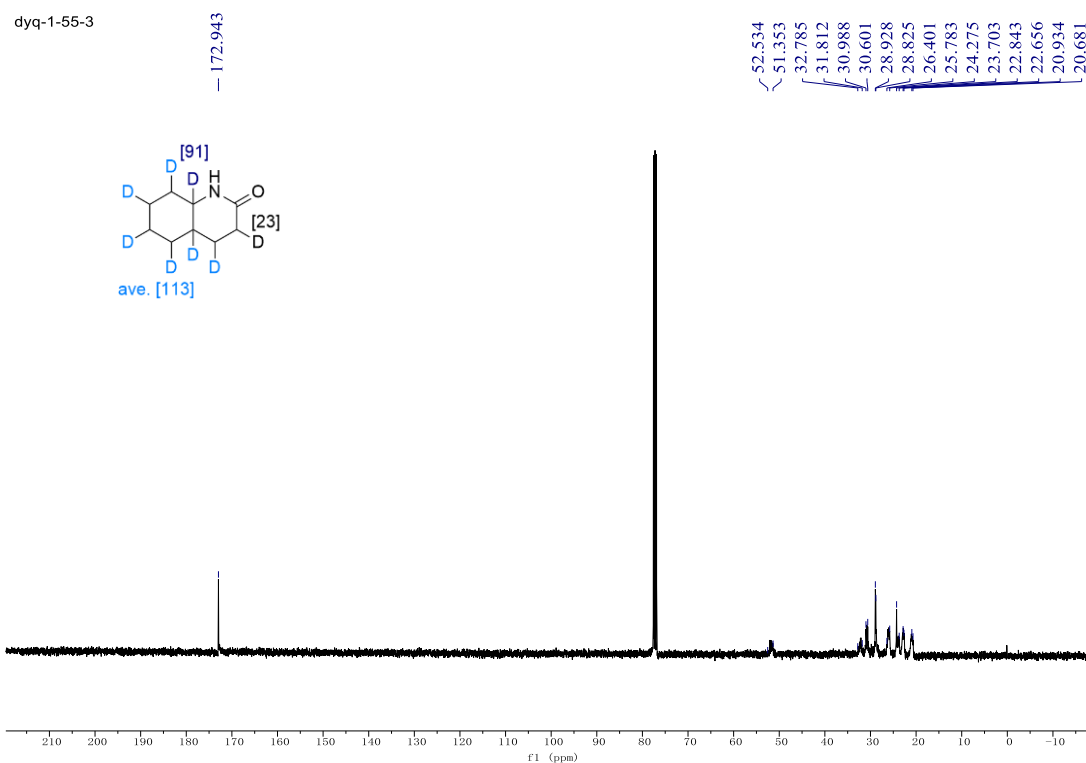

# <sup>1</sup>H NMR for 20b

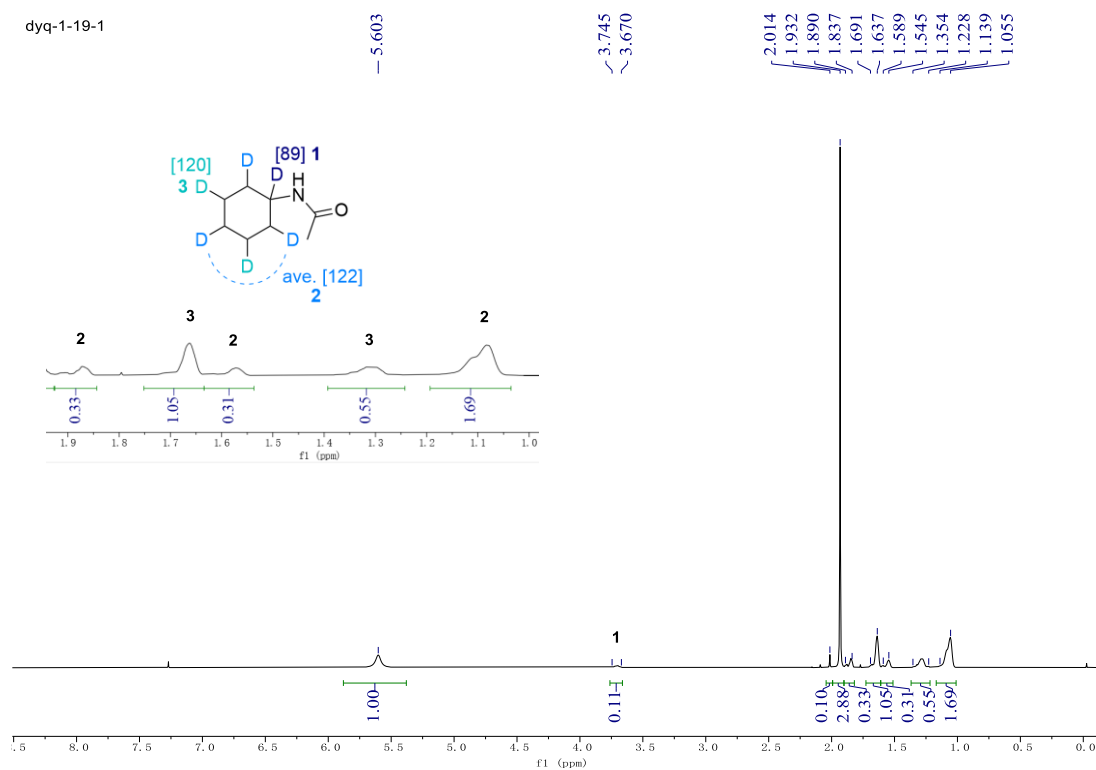



# <sup>13</sup>C NMR for 20b

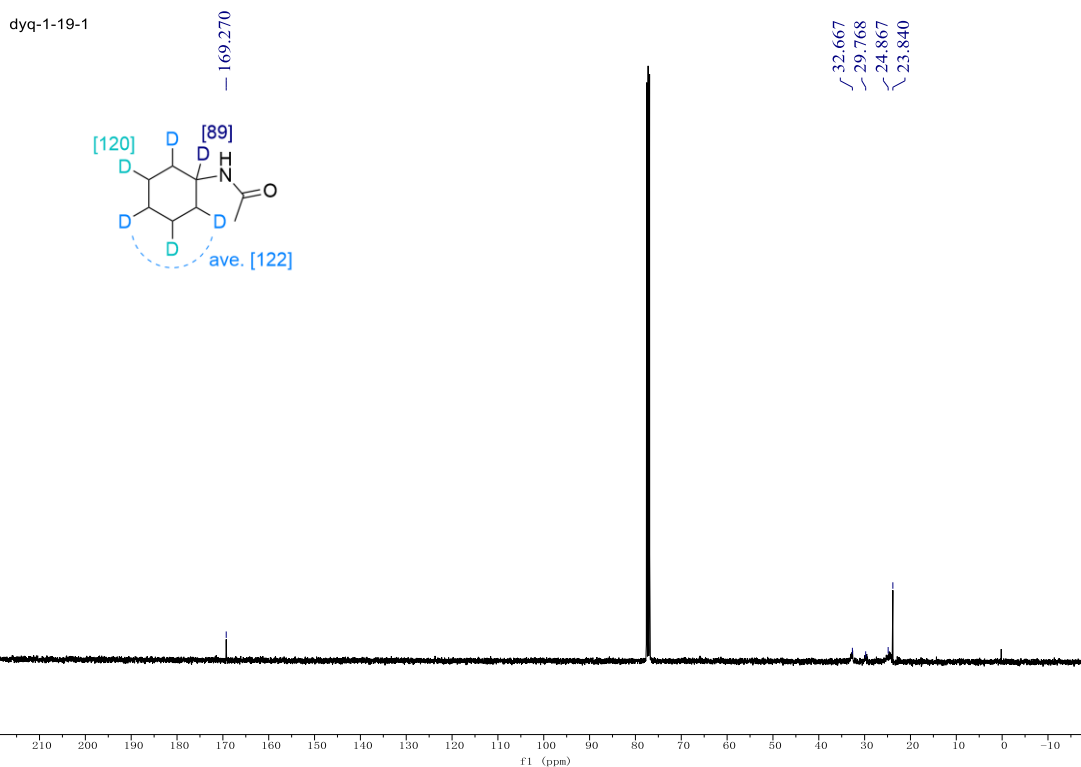

# <sup>1</sup>H NMR for 21b

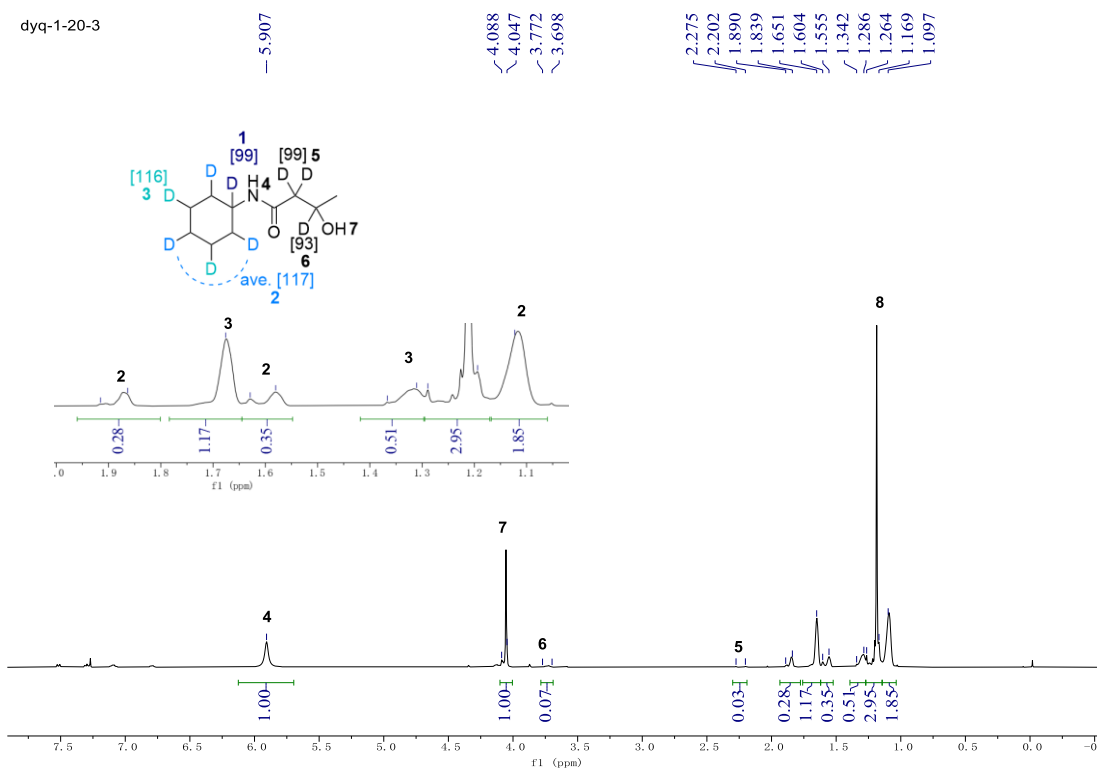

# <sup>13</sup>C NMR for 21b

dyq-1-20-3

171.661

64.982  
64.360  
47.961  
47.565  
43.554  
43.045  
32.789  
32.398  
25.181  
24.145  
22.770  
22.485  
22.274

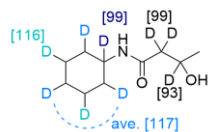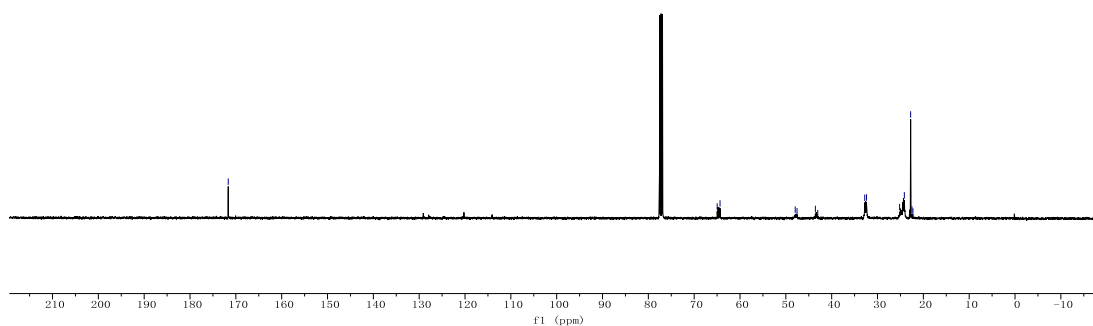

# <sup>1</sup>H NMR for 22b

dyq-1-118-2

3.472  
3.412

2.796  
2.764

2.075  
2.037  
1.777  
1.710  
1.436  
1.265  
1.029  
0.998

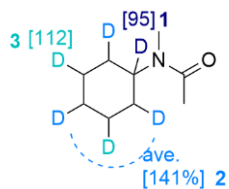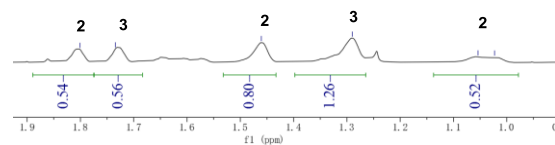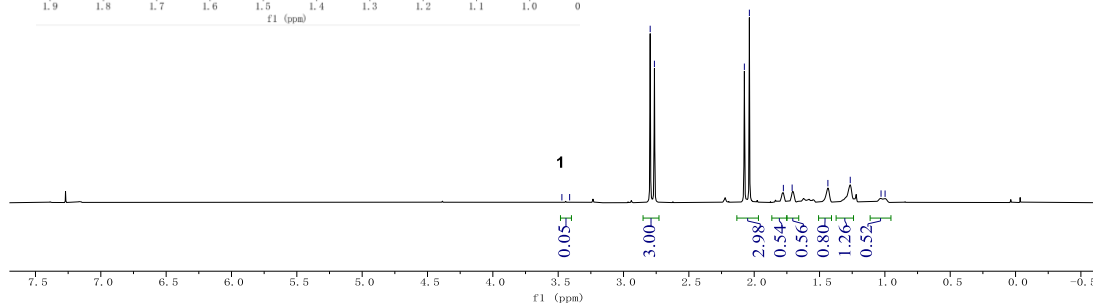

lelaiwen-000016 (d-118-2)  
800 MHz

— 3.433

2.790  
2.753

2.072  
2.030  
1.777  
1.701  
1.435  
1.264  
1.032  
0.996

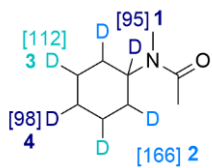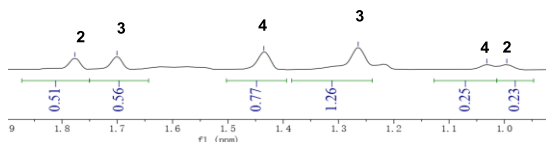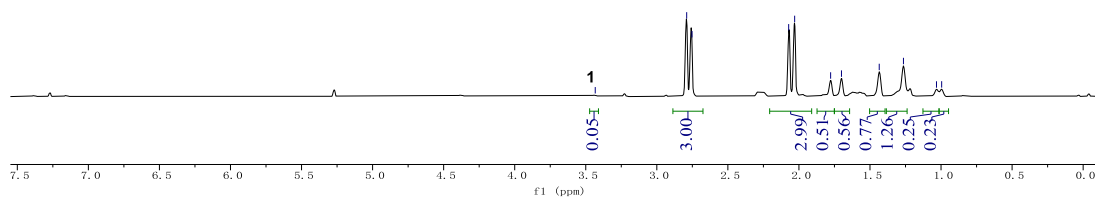

### <sup>13</sup>C NMR for 22b

dyq-1-118-2

170.214  
170.107

57.564  
56.966  
51.912  
51.274  
30.508  
30.290  
30.120  
29.802  
29.149  
27.013  
25.696  
24.272  
22.659  
21.762

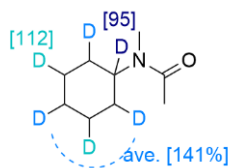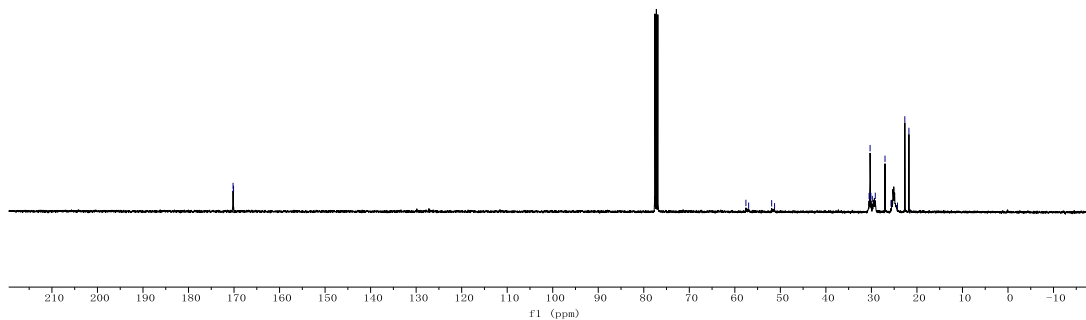

# <sup>1</sup>H NMR for 23b

dyq-1-49-3

~ 3.901  
 ~ 3.828  
 ~ 3.305  
 ~ 3.288  
 ~ 3.270  
 ~ 2.346  
 ~ 2.326  
 ~ 2.306  
 ~ 1.970  
 ~ 1.894  
 ~ 1.692  
 ~ 1.639  
 ~ 1.568  
 ~ 1.275  
 ~ 1.005

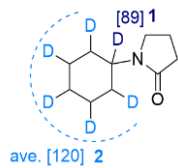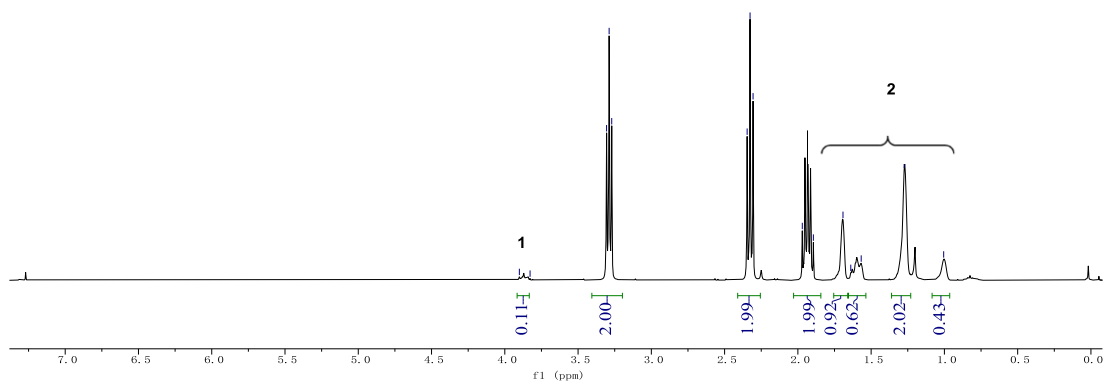

# <sup>13</sup>C NMR for 23b

dyq-1-49-3

~ 174.296

~ 50.365  
 ~ 49.774  
 ~ 42.899  
 ~ 31.713  
 ~ 30.089  
 ~ 29.404  
 ~ 25.396  
 ~ 24.343  
 ~ 18.231

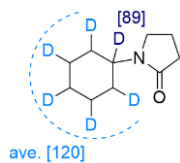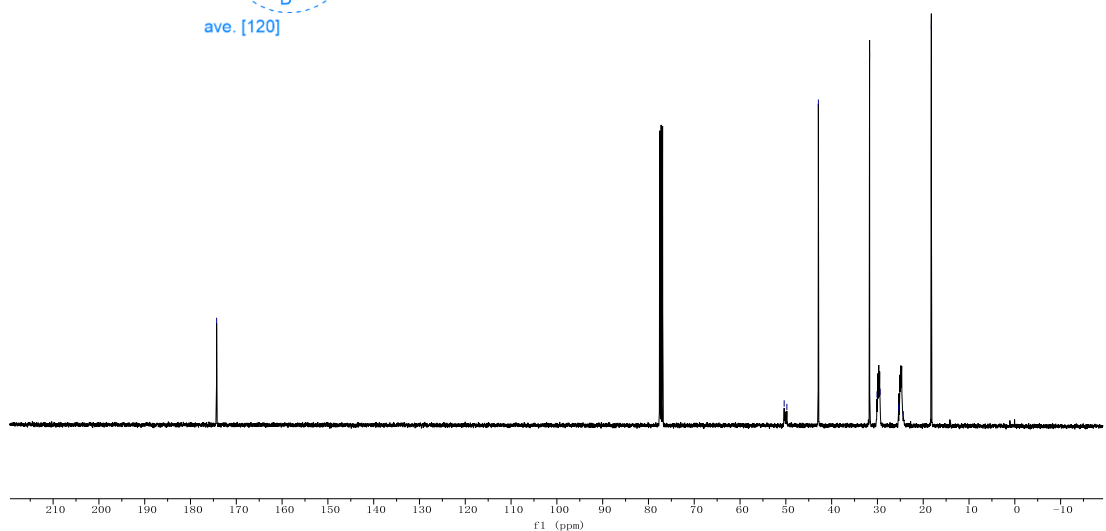

# <sup>1</sup>H NMR for 24b

dyq-1-118-3

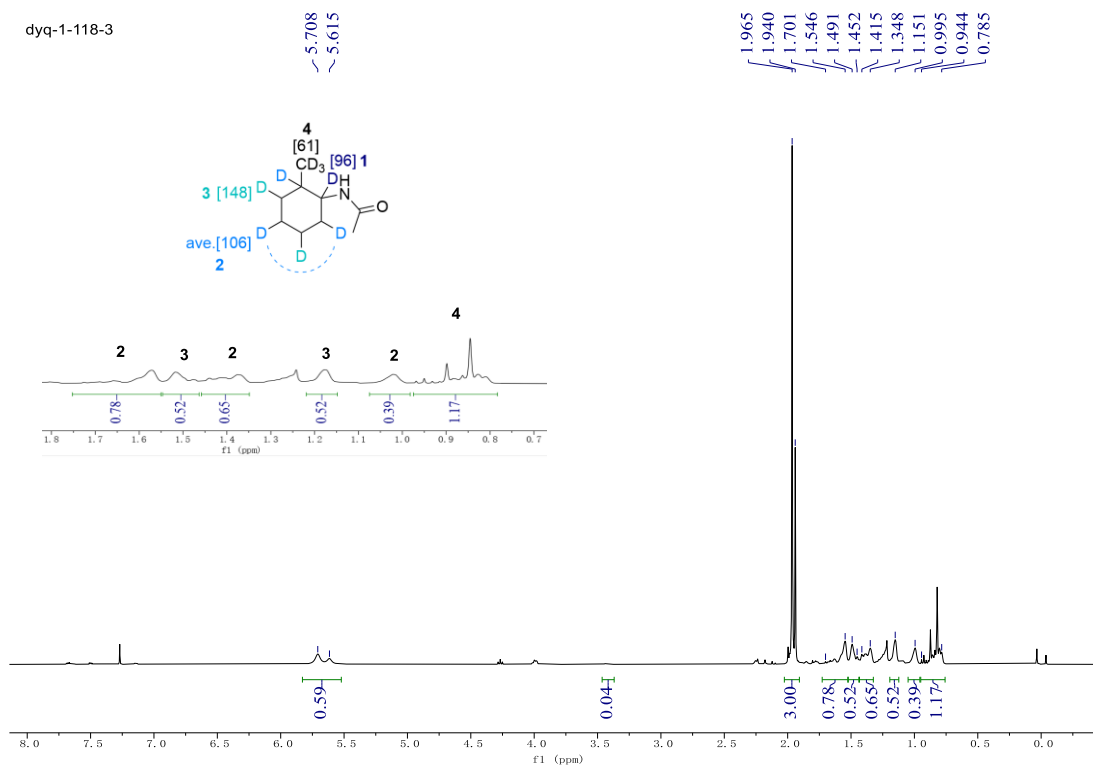

# <sup>13</sup>C NMR for 24b

dyq-1-118-3

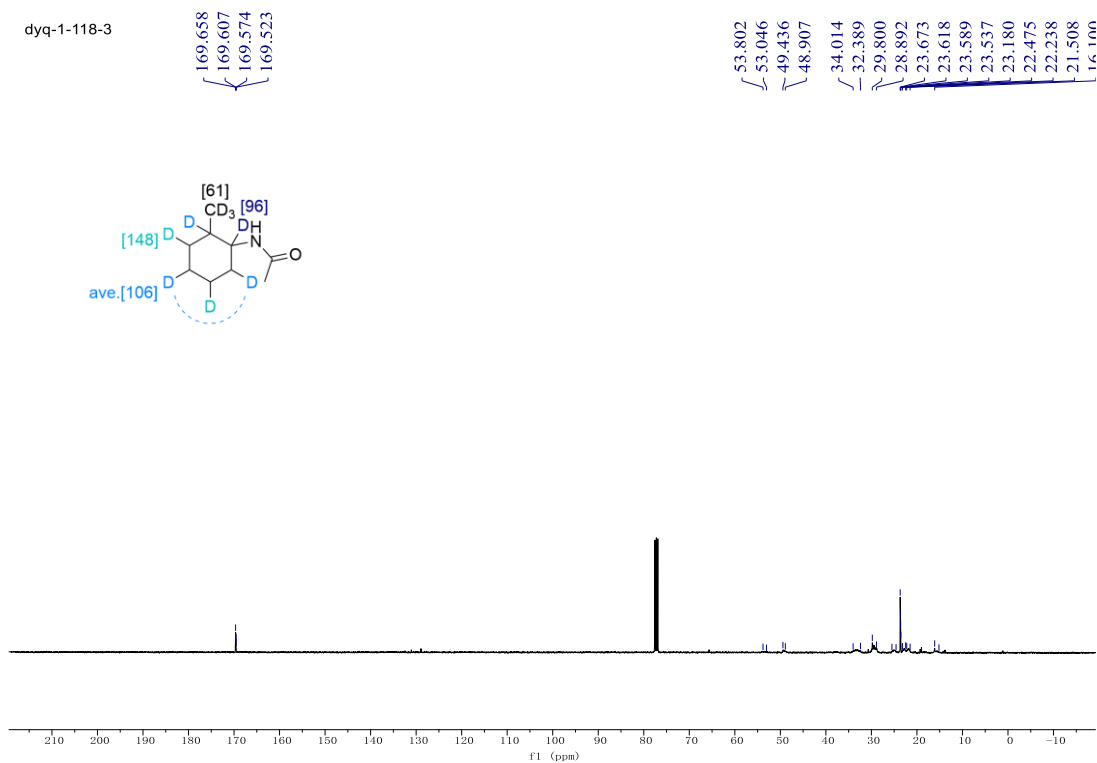

# <sup>1</sup>H NMR for 25b

dyq-1-109-1

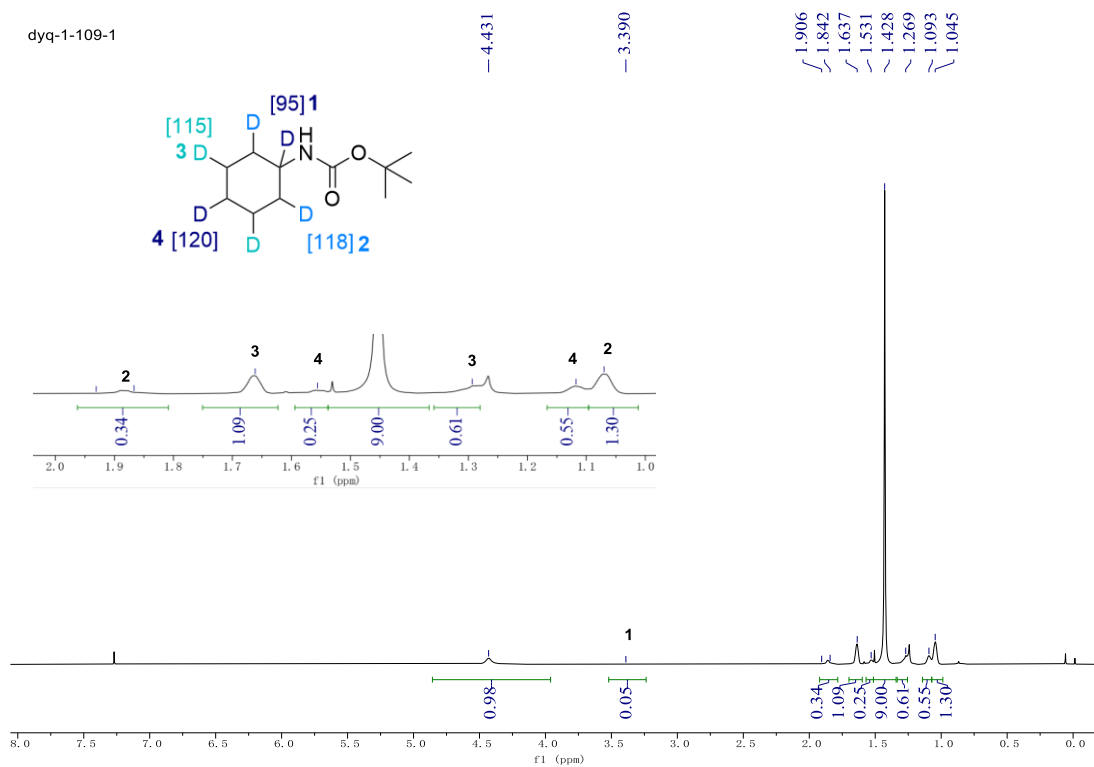

# <sup>13</sup>C NMR for 25b

dyq-1-109-1

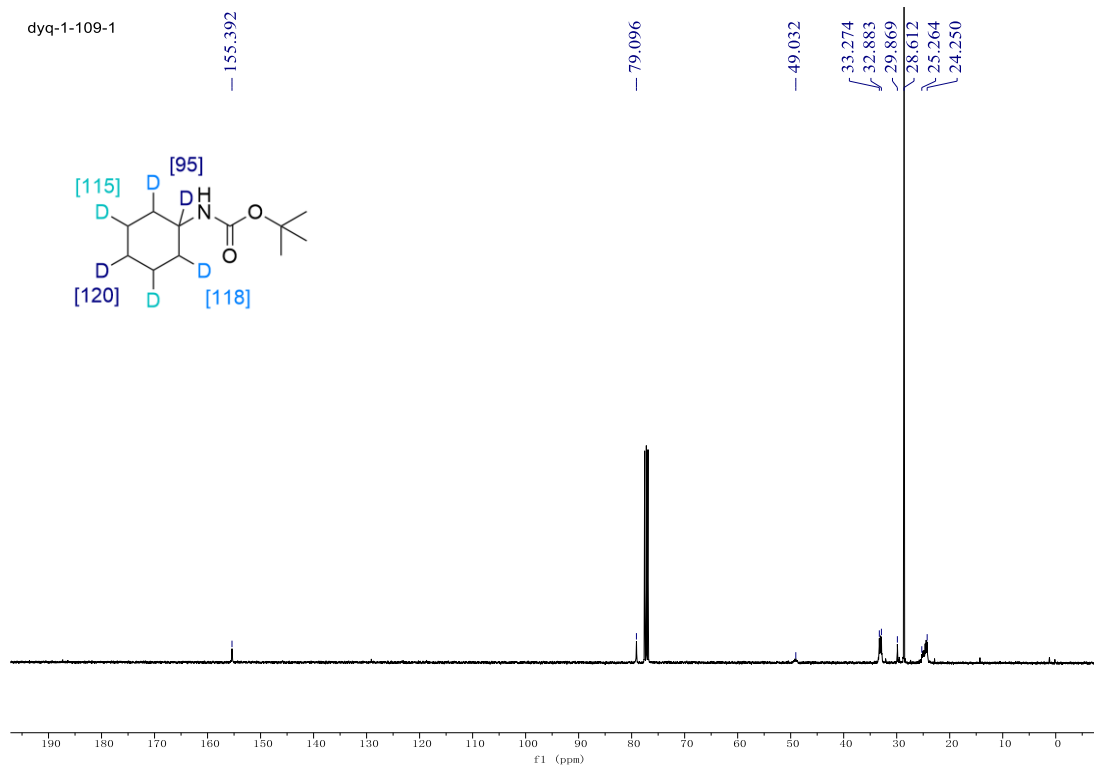

# <sup>1</sup>H NMR for 26b

dyq-1-49-1

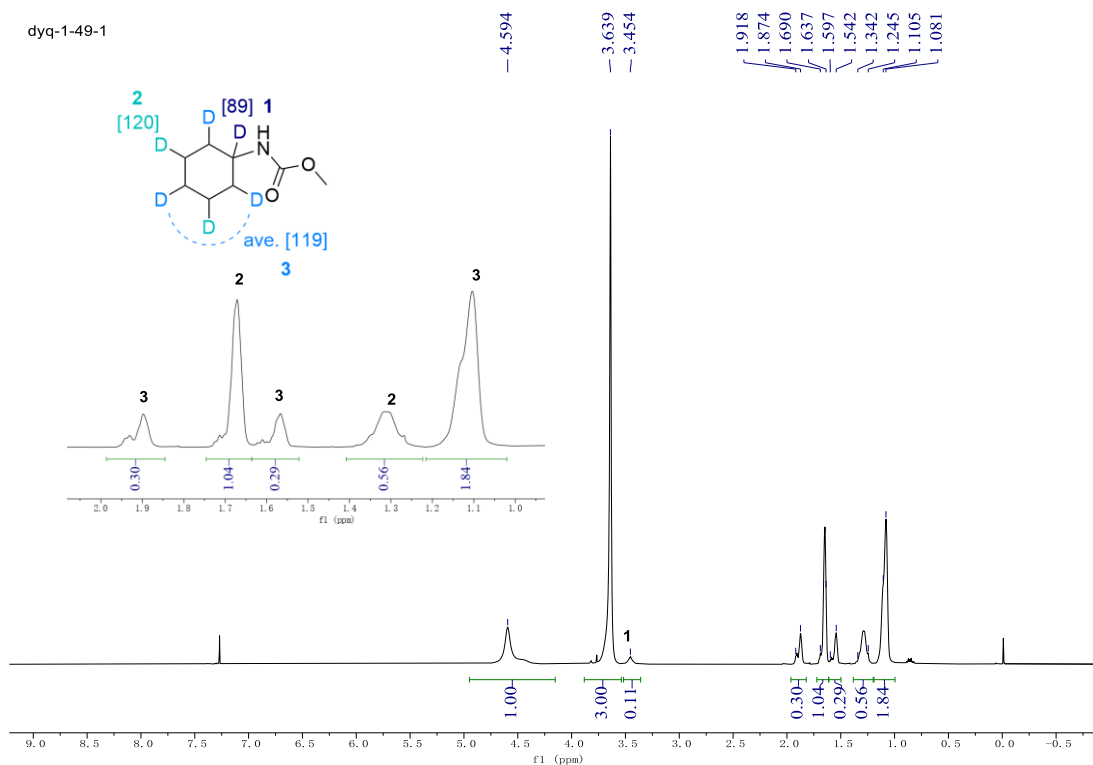

lelaiwen-000019 (d-49-1)  
800 MHz

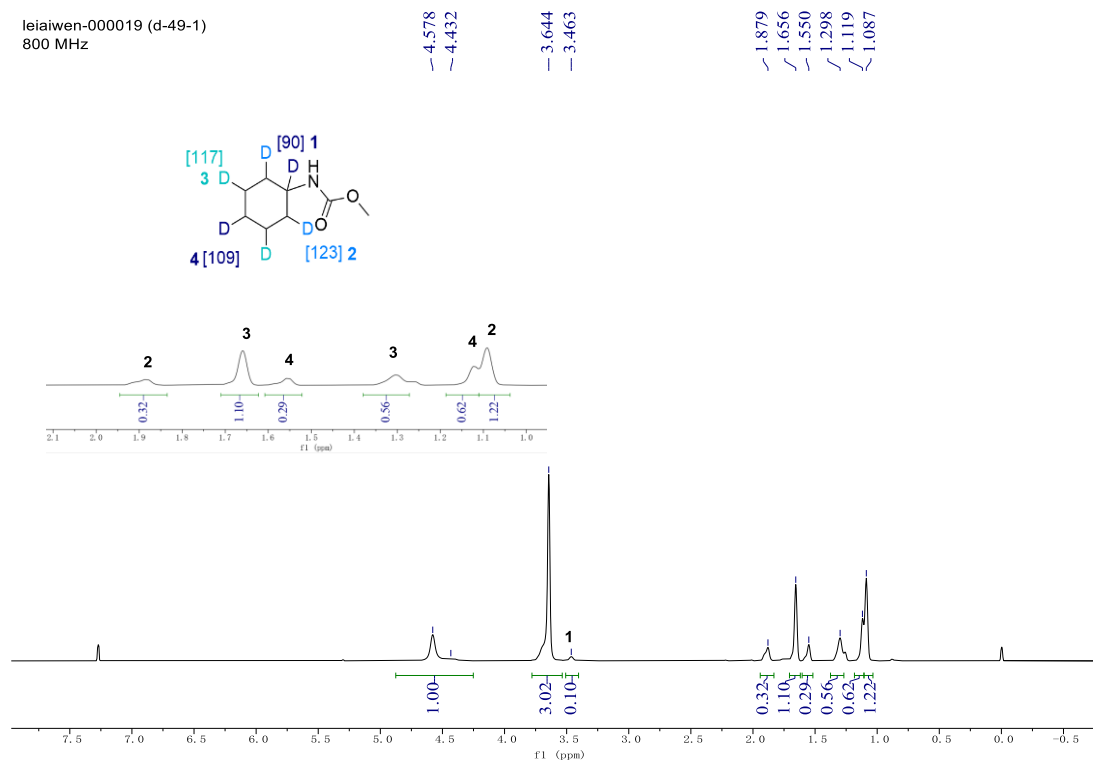

# <sup>13</sup>C NMR for 26b

lelaiwen-000019 (d-49-1)  
800 MHz

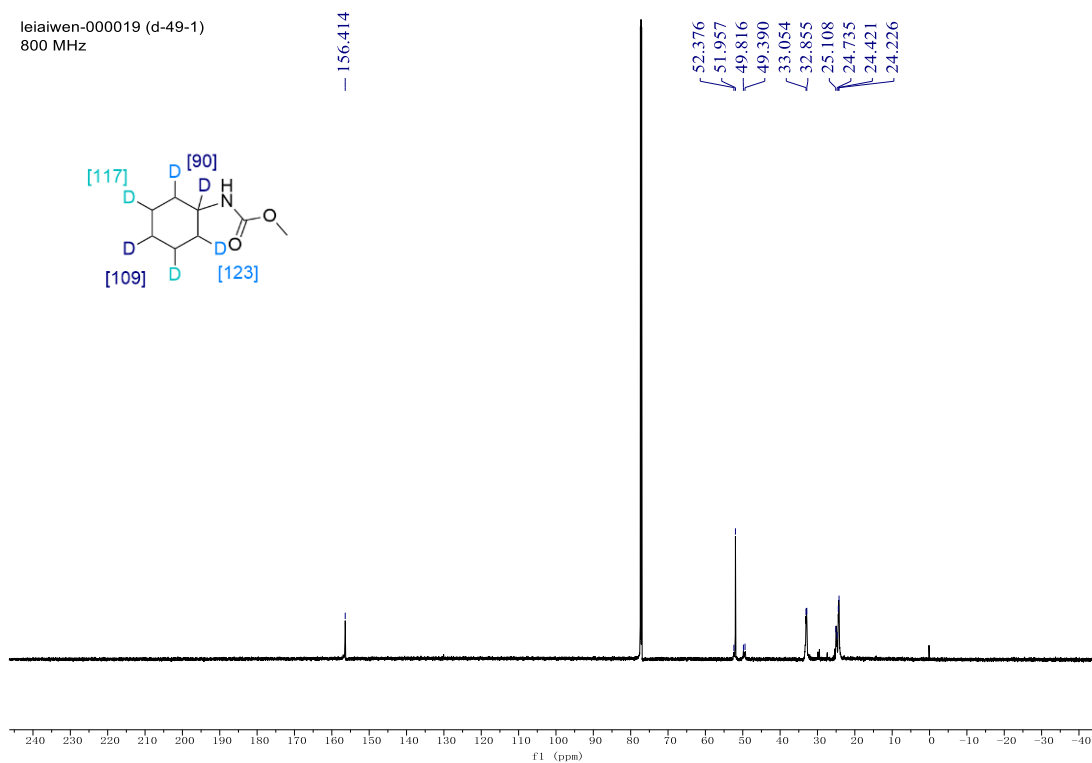

# <sup>1</sup>H NMR for 27b

dyq-1-1-2

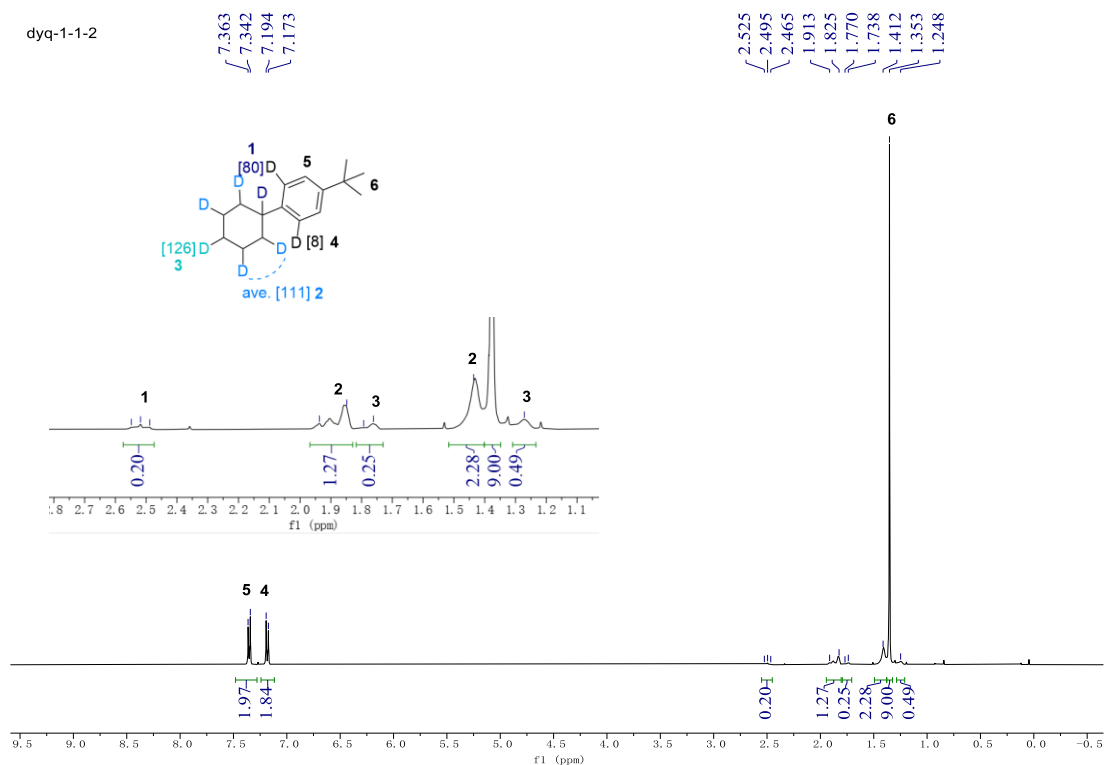



# <sup>13</sup>C NMR for 27b

dyq-1-1-2

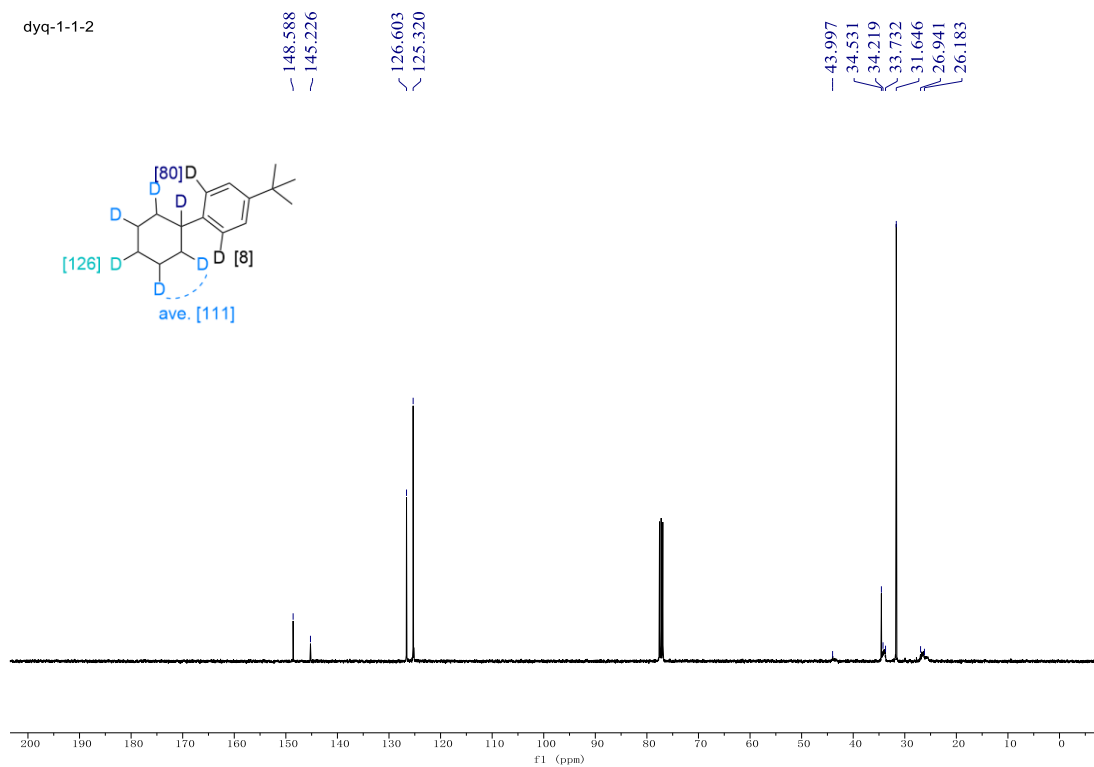

# <sup>1</sup>H NMR for 28b

dyq-1-127-2

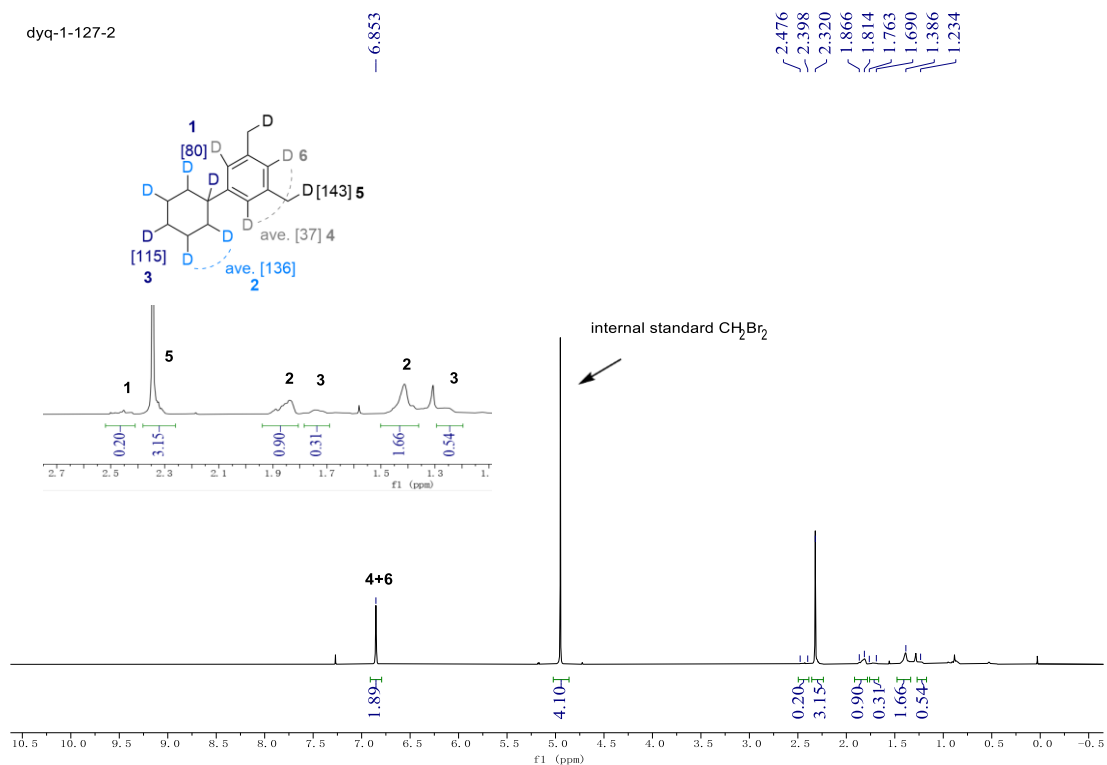

# <sup>13</sup>C NMR for 28b

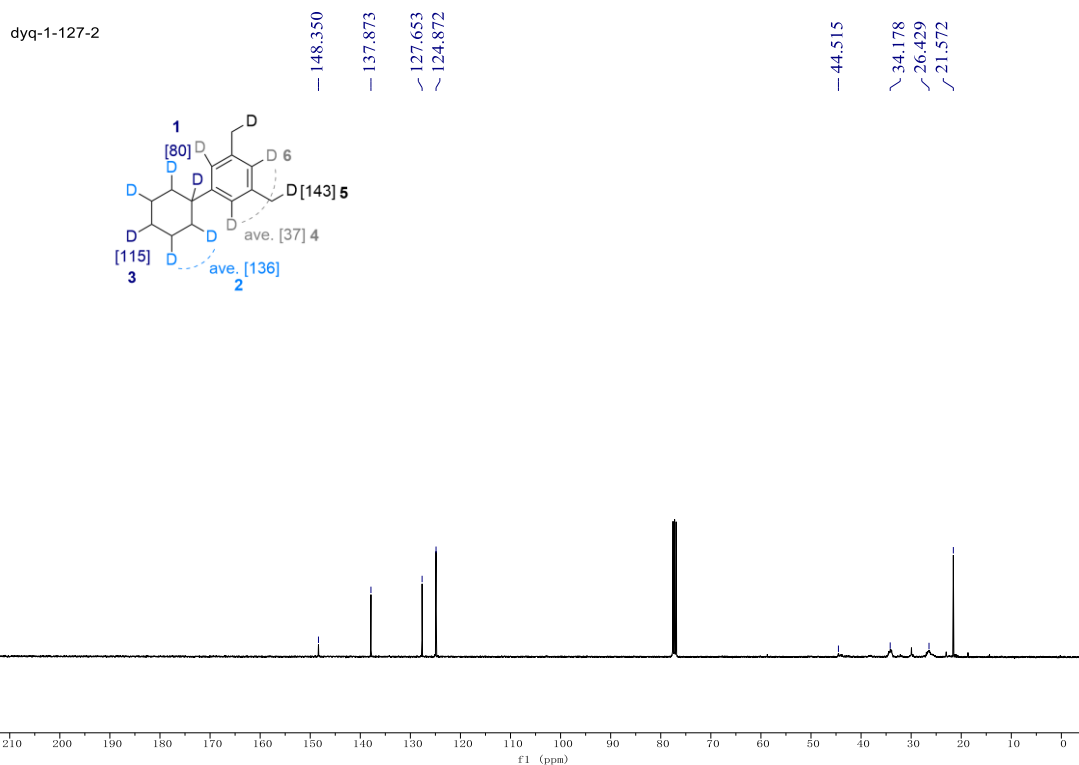

# <sup>1</sup>H NMR for 29b

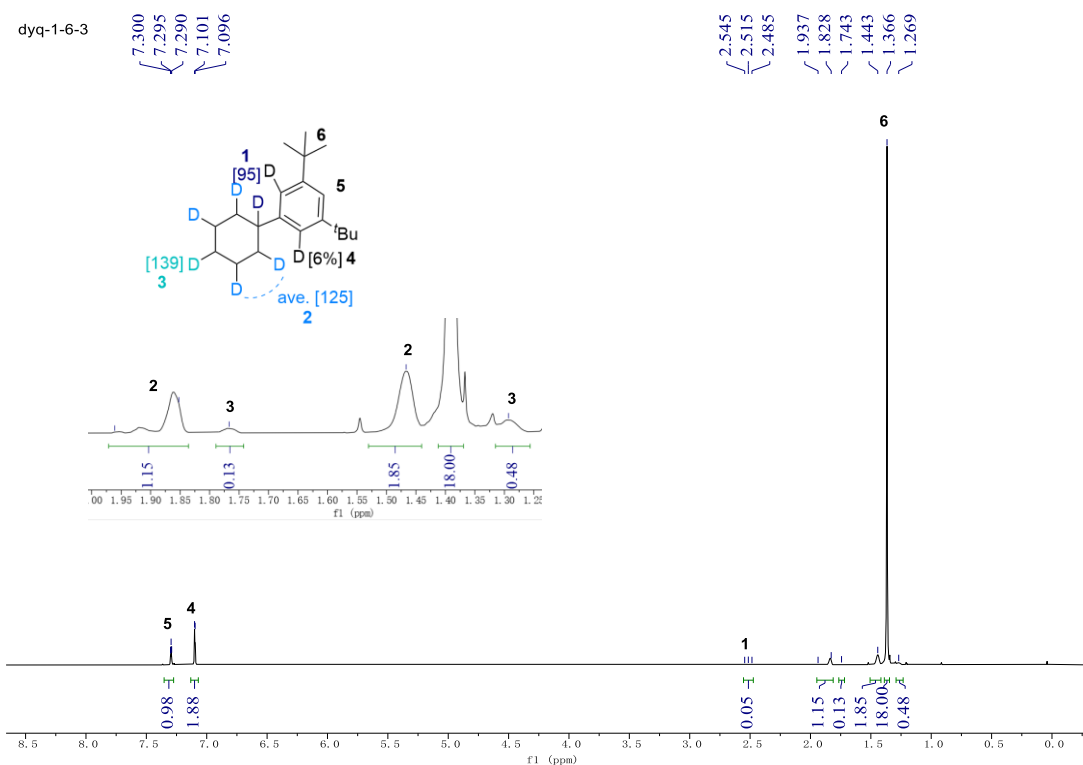

# **<sup>13</sup>C NMR for 29b**

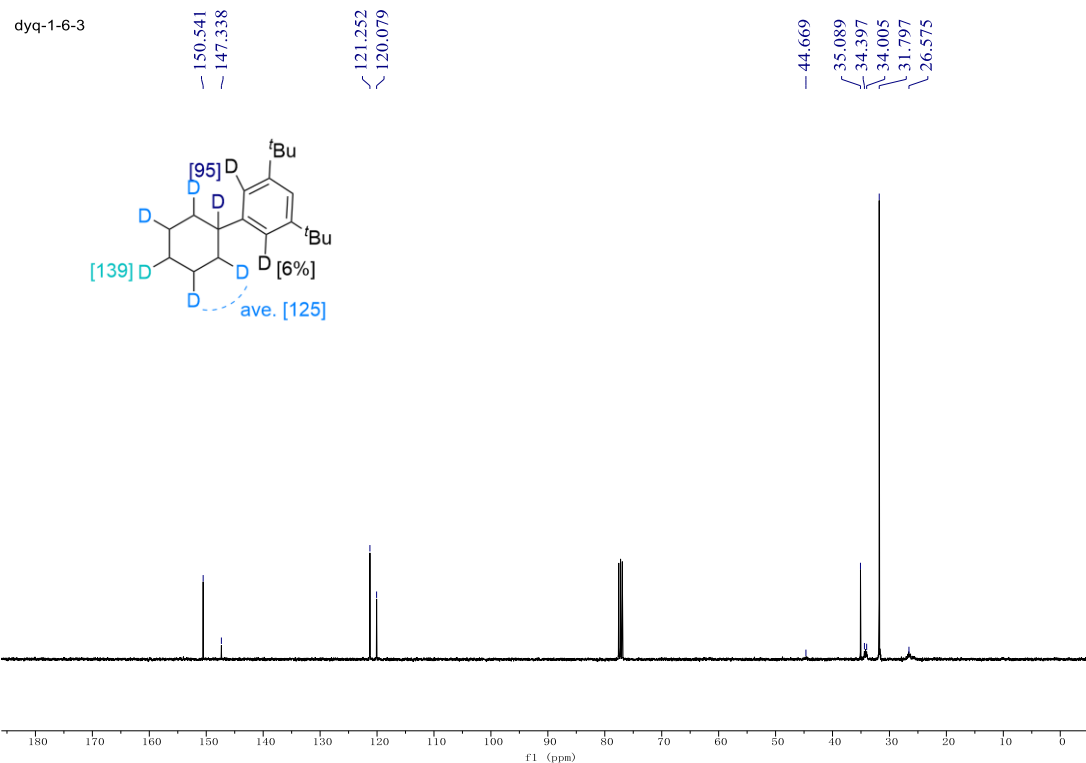

# **<sup>1</sup>H NMR for 30b**

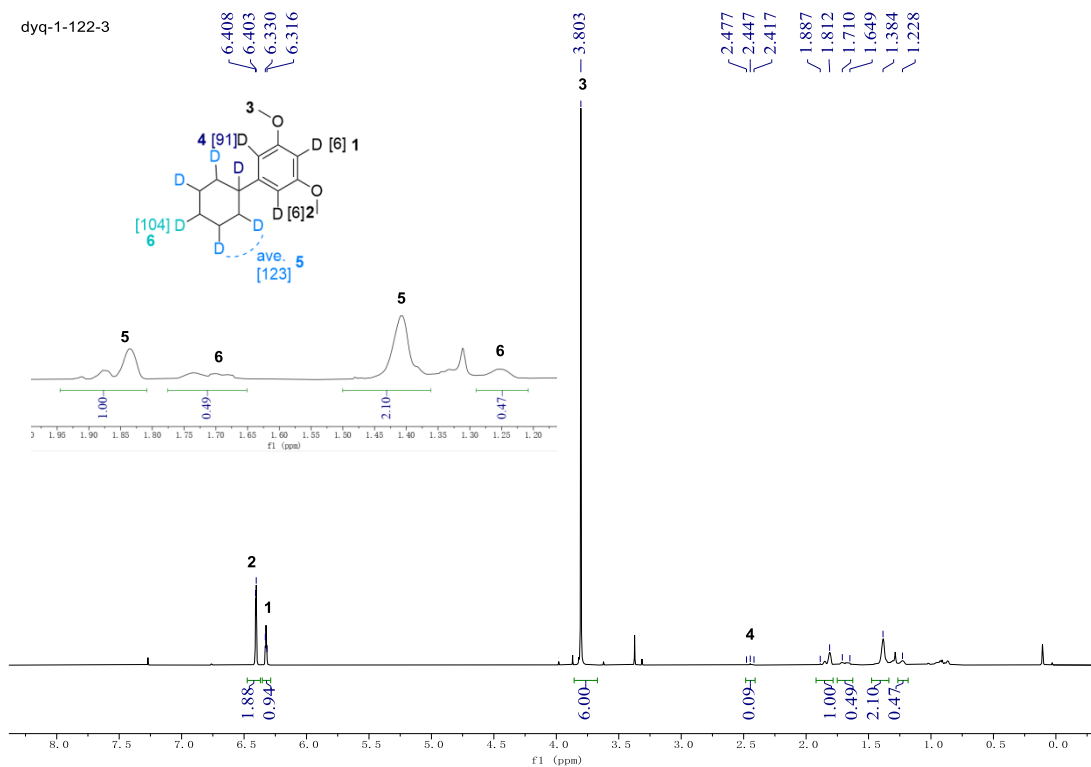

### <sup>13</sup>C NMR for 30b

dyq-1-122-3

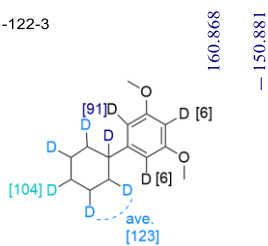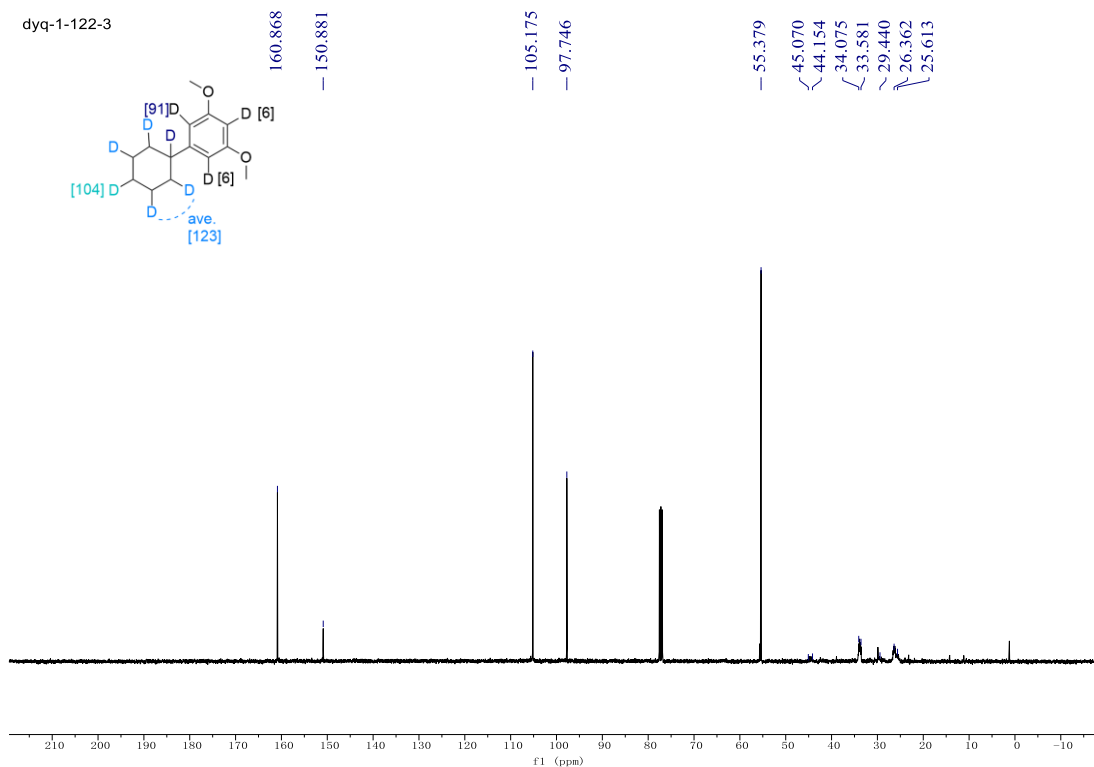

**<sup>1</sup>H NMR for 31b**

dyq-1-25-4

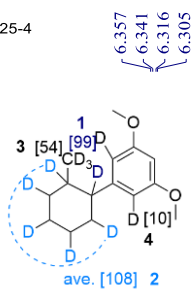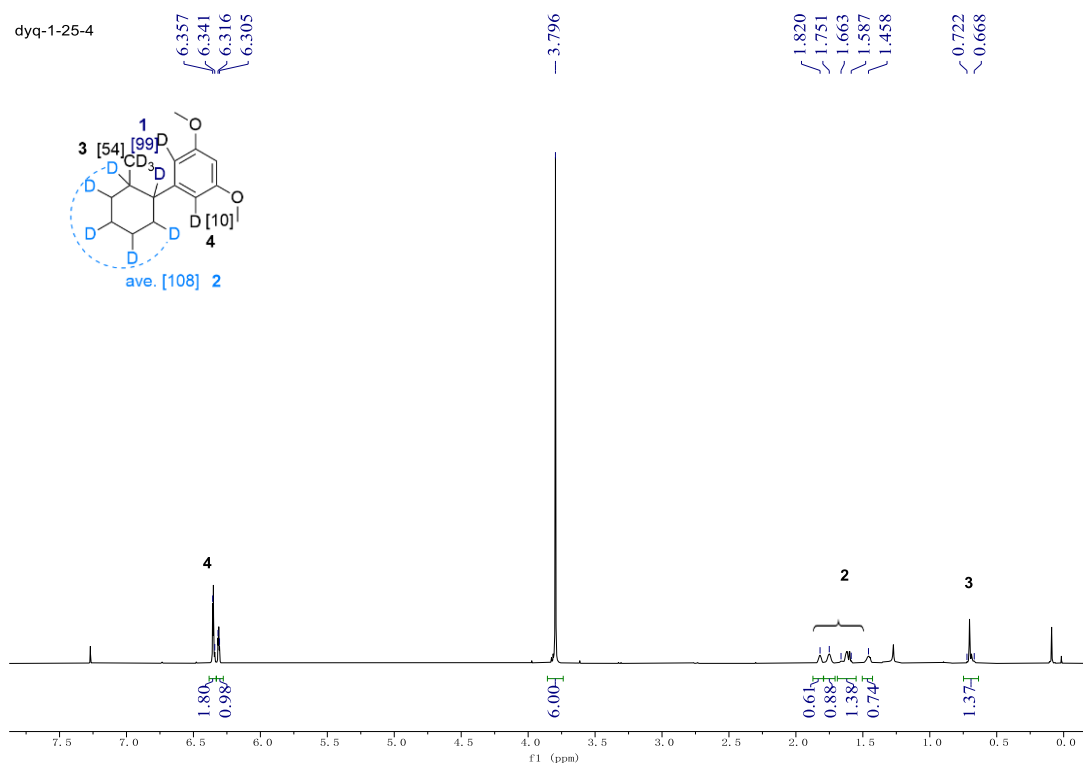

# <sup>13</sup>C NMR for 31b

dyq-1-25-4

— 160.622

— 149.177

— 106.030

— 97.420

— 55.407

33.346

32.919

26.382

26.206

24.369

24.146

20.225

19.593

12.507

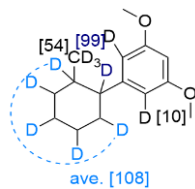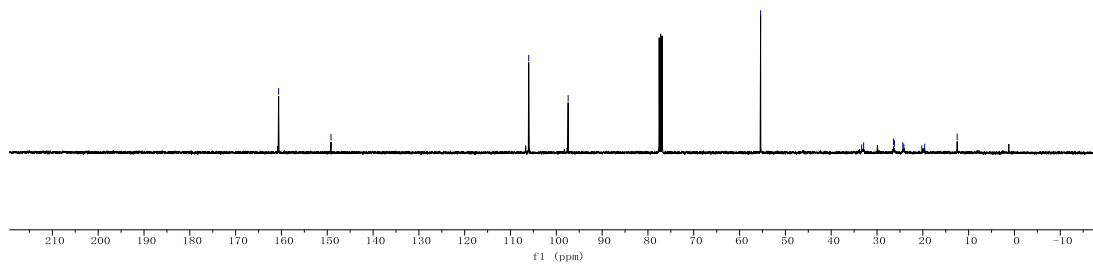

# <sup>1</sup>H NMR for 32b

dyq-1-161-2

1.712

1.578

1.154

0.903

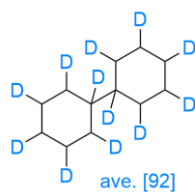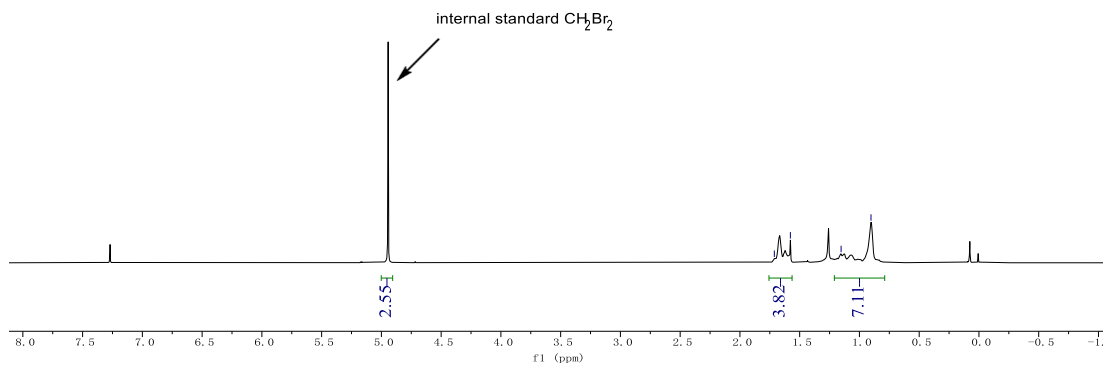

# <sup>13</sup>C NMR for 32b

dyq-1-161-2

29.751  
26.417

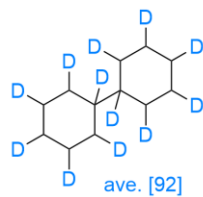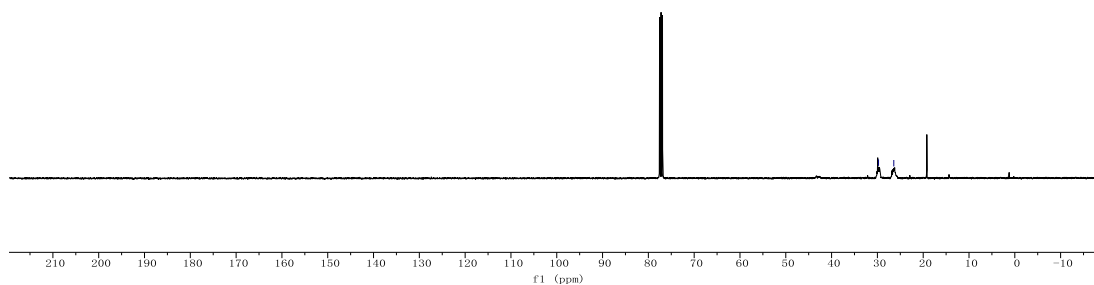

# <sup>1</sup>H NMR for 33b

dyq-1-55-4

5.457  
5.393

2.099  
2.070  
1.781  
1.620  
1.375  
1.218  
1.113  
0.927

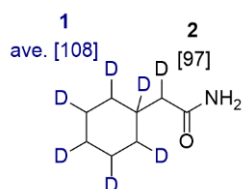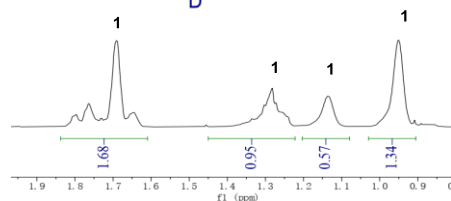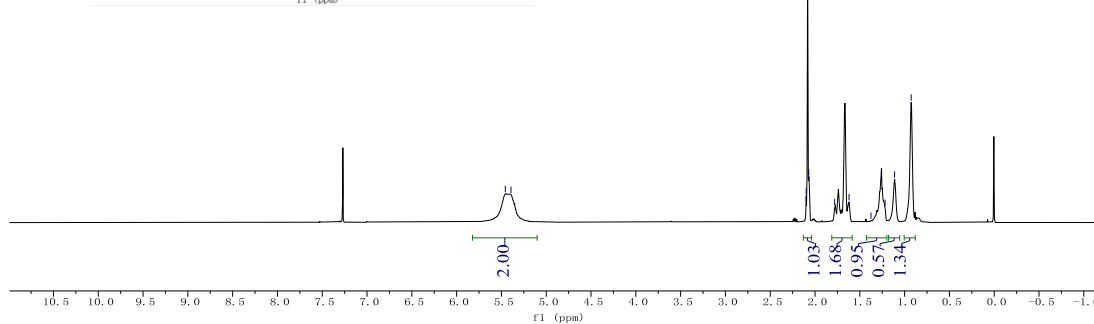

# <sup>13</sup>C NMR for 33b

dyq-1-55-4

175.178

44.095

32.636

29.912

25.569

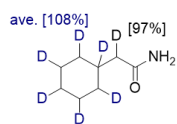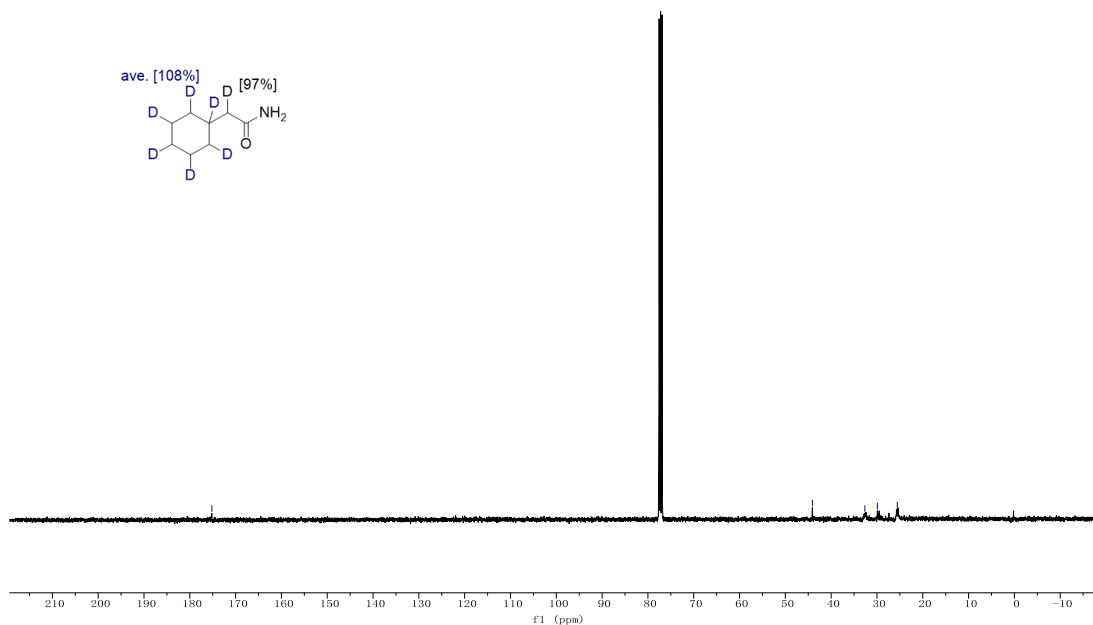

# <sup>1</sup>H NMR for 34b

dyq-1-49-4

3.307  
3.289  
3.272  
3.025  
2.985

2.324  
2.304  
2.284

1.969  
1.894  
1.629  
1.519

1.119  
1.037  
0.830

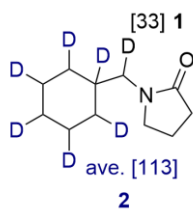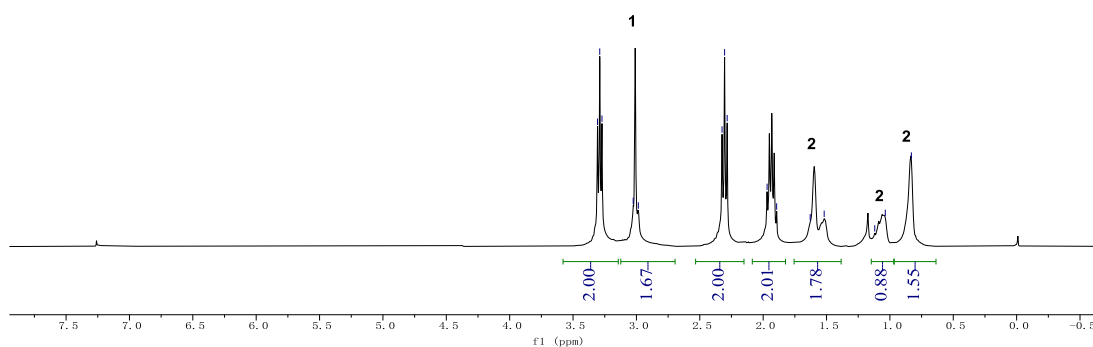

# <sup>13</sup>C NMR for 34b

lelaiwen-000021 (d-49-4)  
800 MHz

175.267

49.030  
48.940  
48.721  
48.515  
48.061  
48.026  
47.990  
35.306  
31.201  
30.292  
30.097  
25.936  
25.637  
25.305  
25.115  
18.185

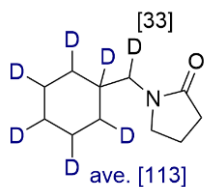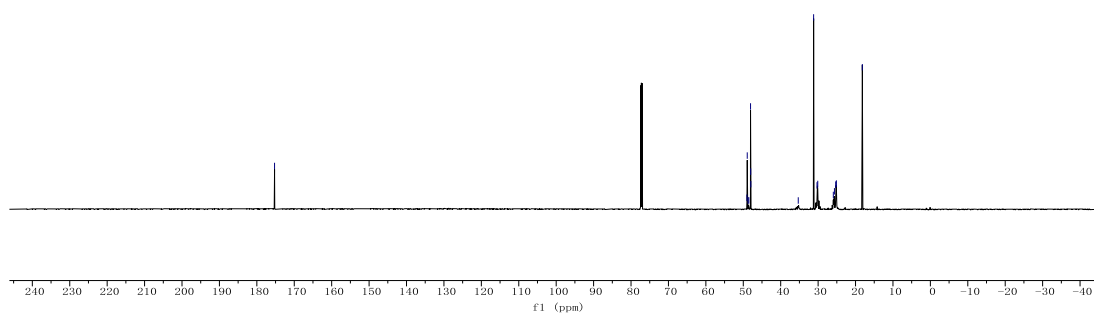

# <sup>1</sup>H NMR for 35b

dyq-1-71-3

3.556  
3.480

1.992  
1.953  
1.740  
1.679  
1.597  
1.545

0.907

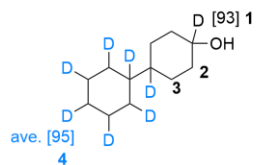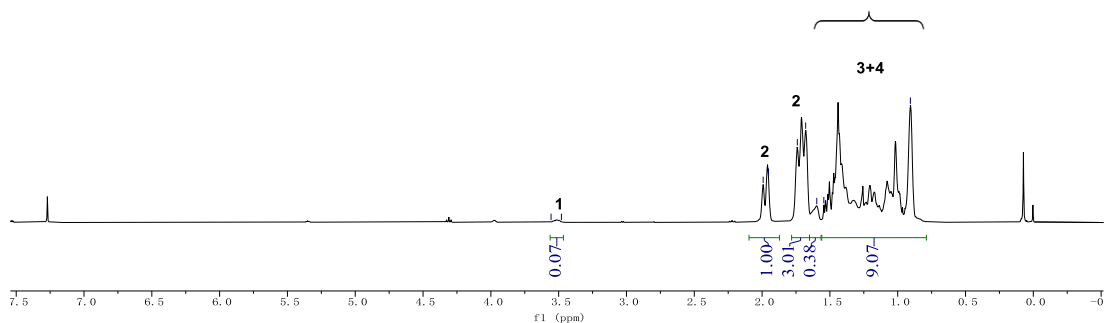



# <sup>13</sup>C NMR for 35b

dyq-1-71-3

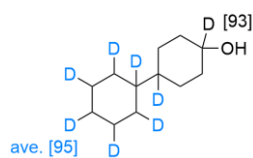

71.009  
42.429  
41.696  
36.117  
36.008  
35.352  
32.848  
32.649  
30.289  
29.387  
28.219  
28.109  
28.009  
26.747  
25.789  
23.963  
23.863  
23.769

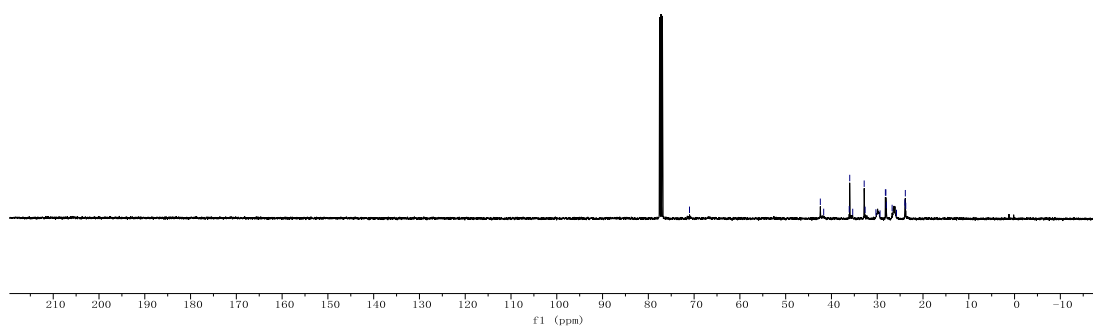

# <sup>1</sup>H NMR for 36b

dyq-1-22-4

6.843  
6.834  
6.468  
6.446

3.691  
3.312  
3.278  
2.799  
2.754  
2.261  
1.977  
1.927

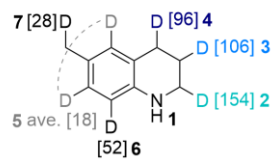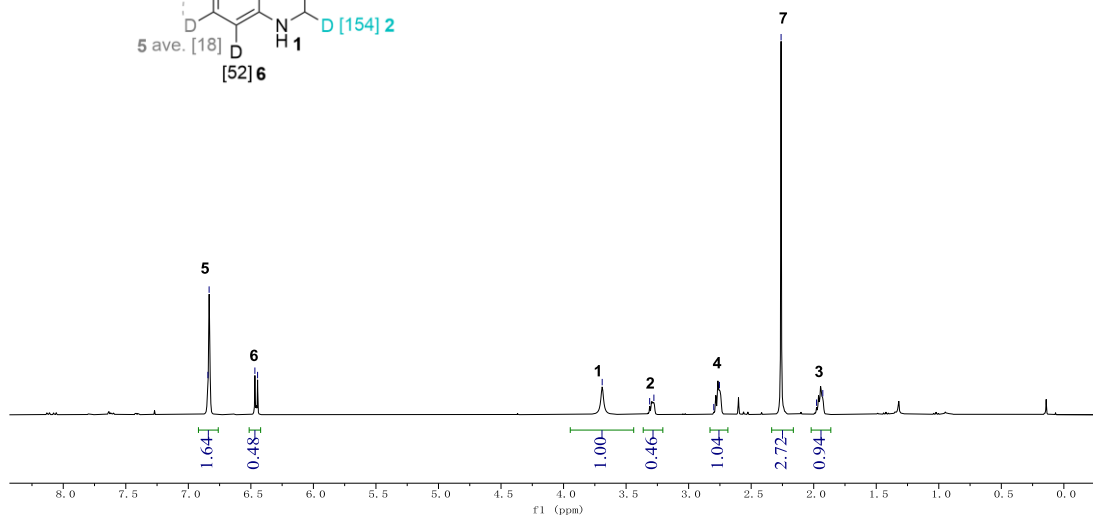

# <sup>13</sup>C NMR for 36b

dyq-1-22-4

142.642  
130.278  
127.442  
126.440  
121.765  
114.651

42.272  
27.031  
21.834  
20.604

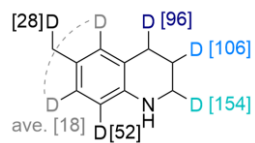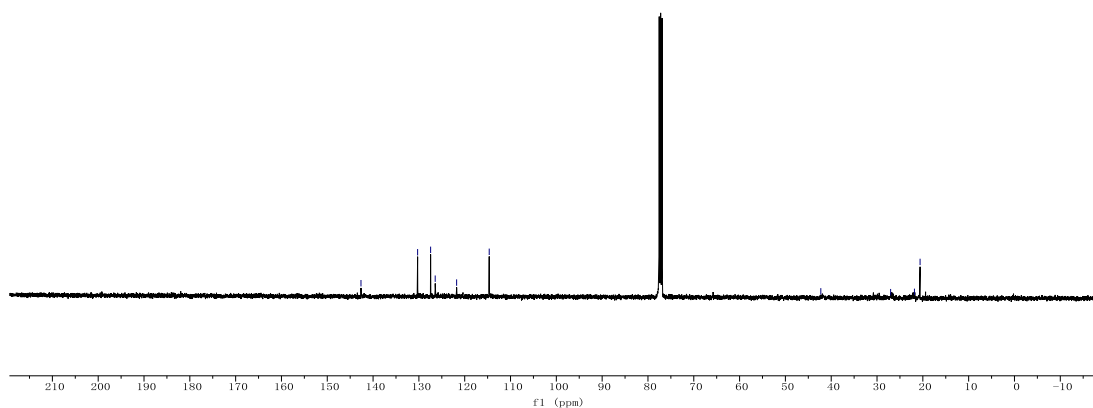

# <sup>1</sup>H NMR for 37b

bfx-8-42-1

6.863  
6.844  
6.461  
6.457  
6.442  
6.438  
6.325

3.292  
3.259  
2.736  
2.706  
2.229  
1.939  
1.889

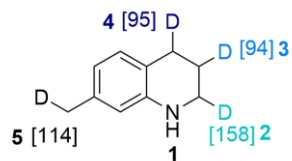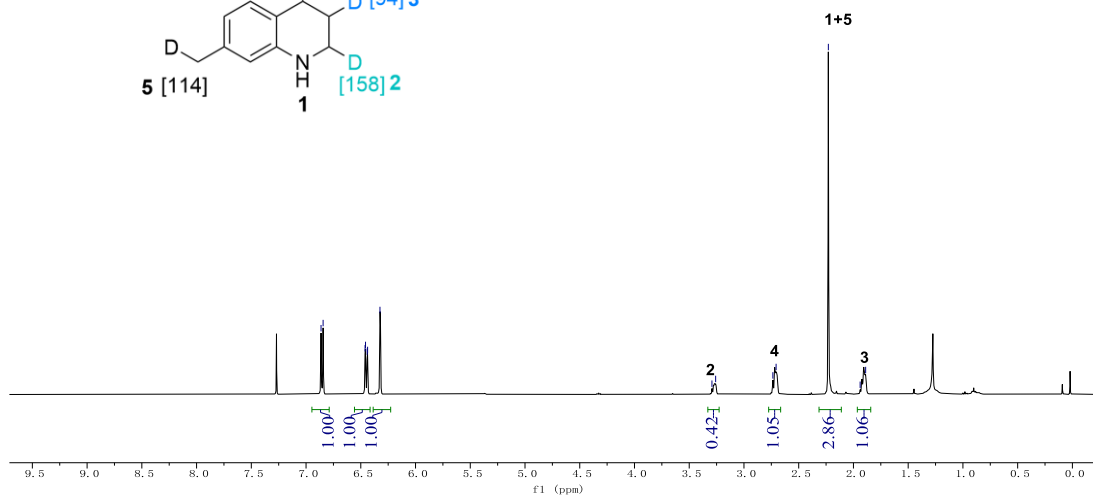

# <sup>13</sup>C NMR for 37b

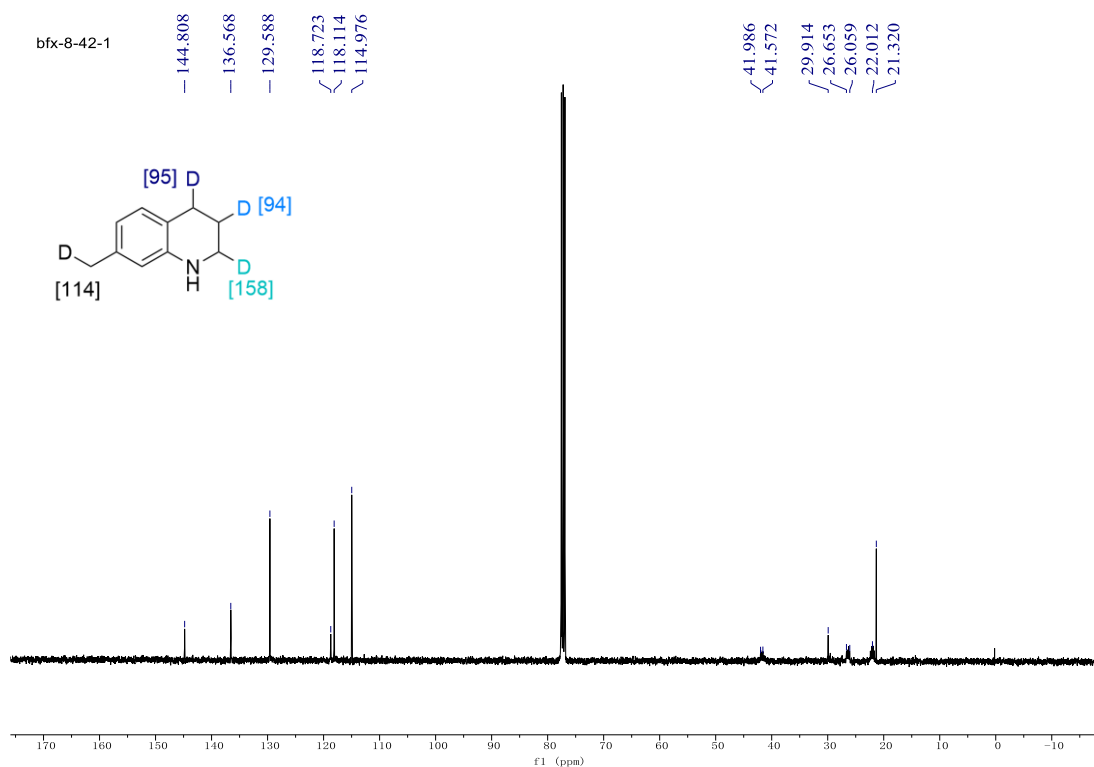

# <sup>1</sup>H NMR for 38b

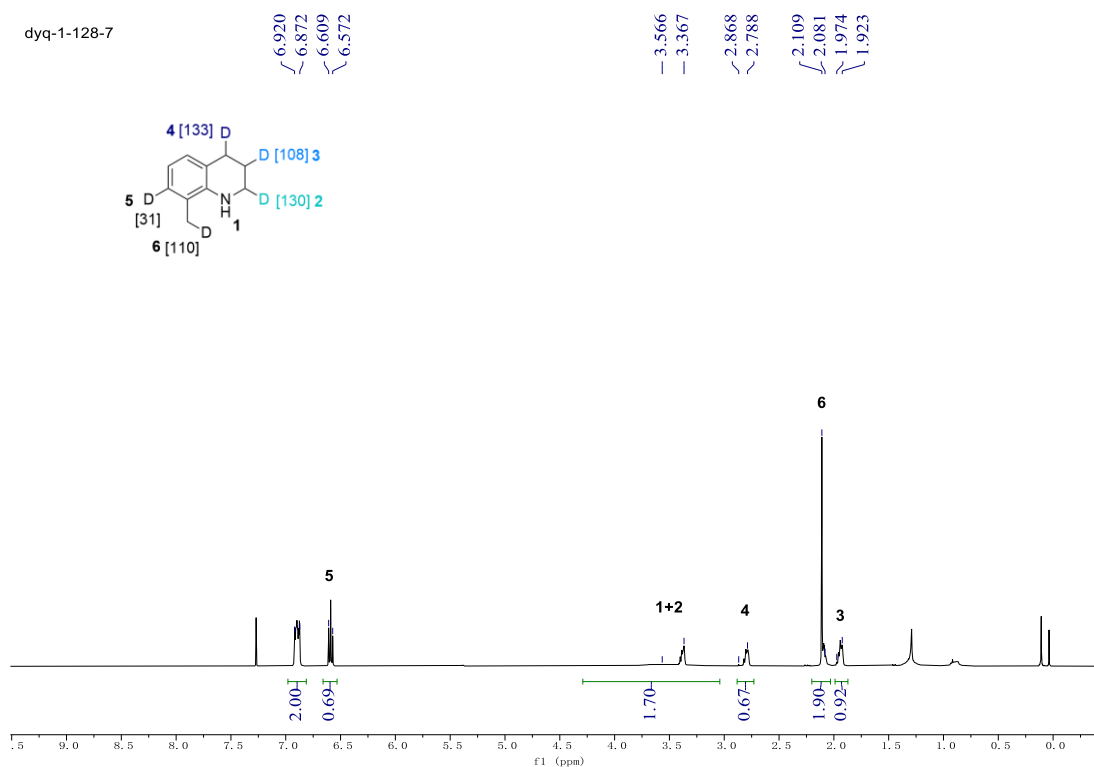

### <sup>13</sup>C NMR for 38b

dyq-1-128-7

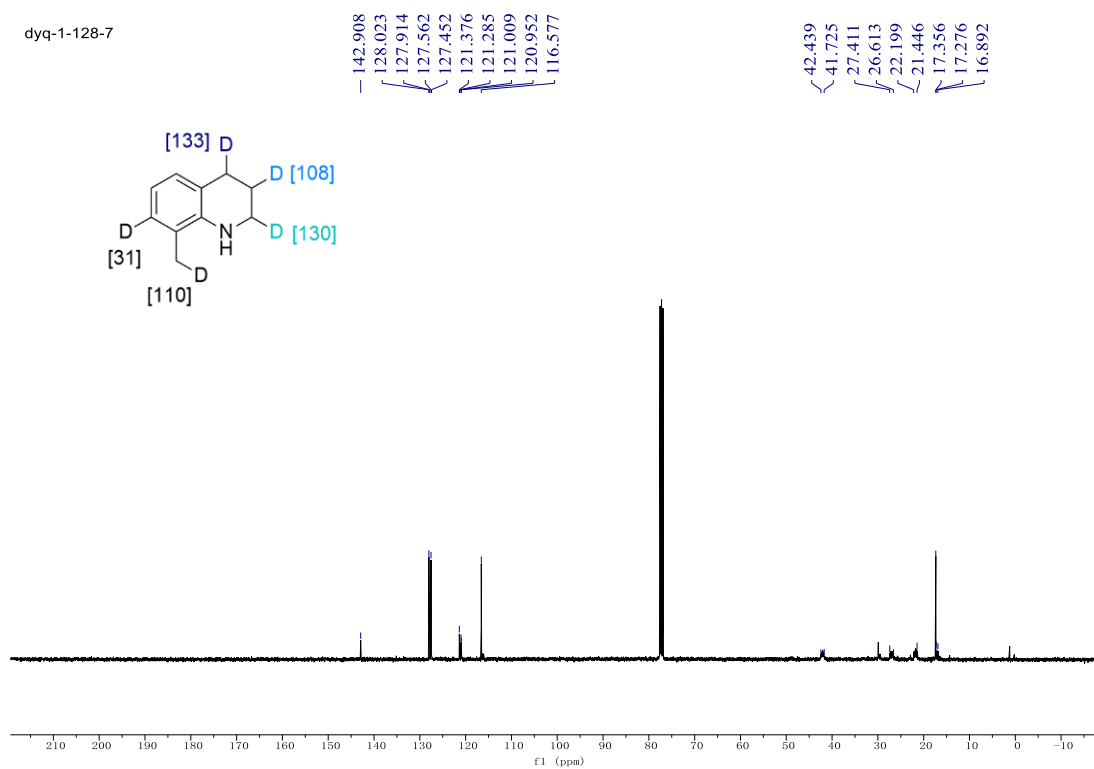

### <sup>1</sup>H NMR for 39b

dyq-1-42-2

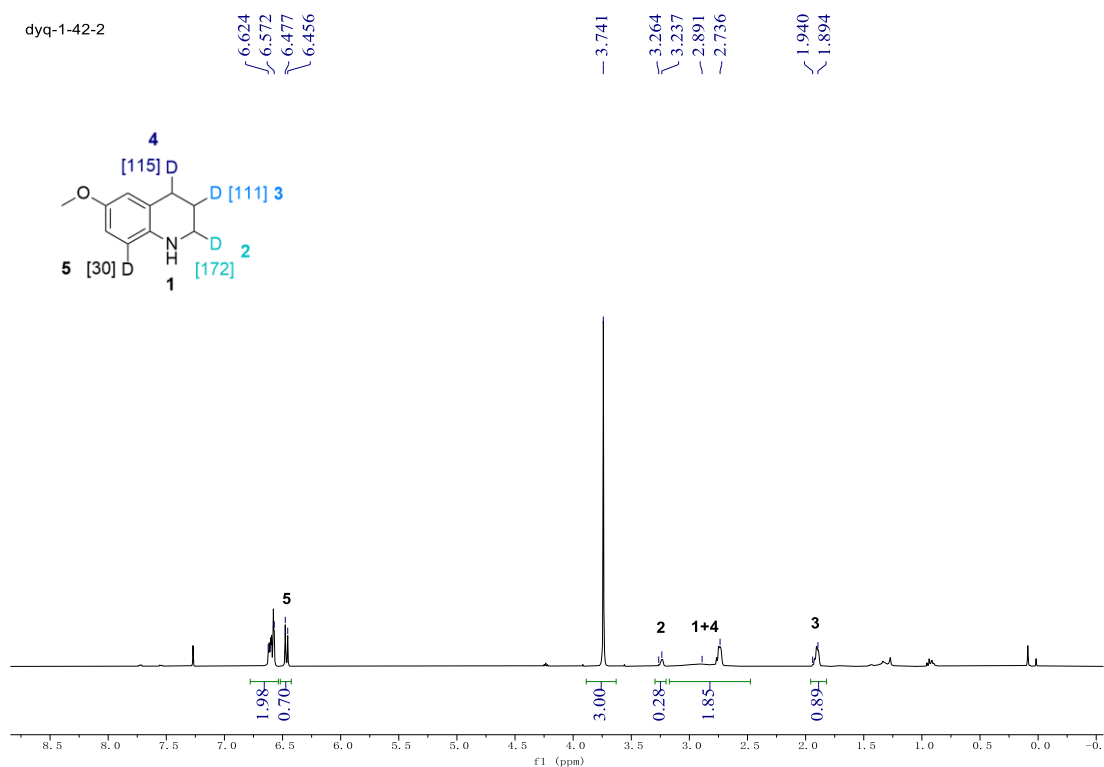

### <sup>13</sup>C NMR for 39b

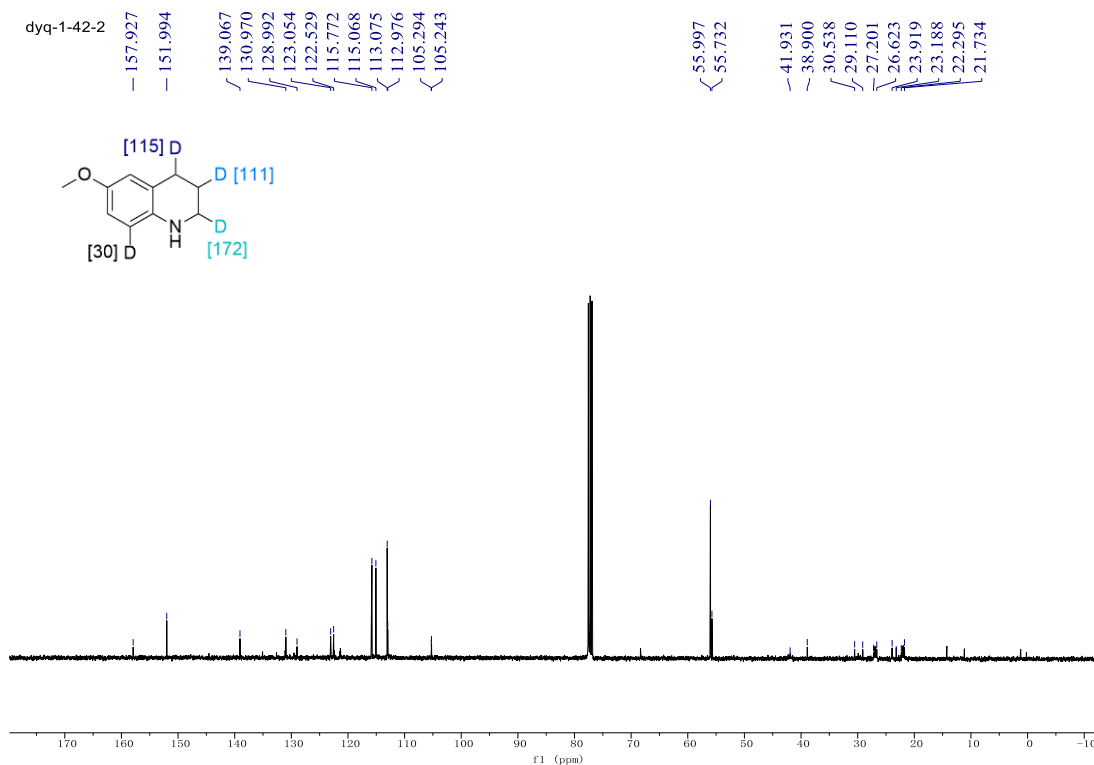

### <sup>1</sup>H NMR for 40b

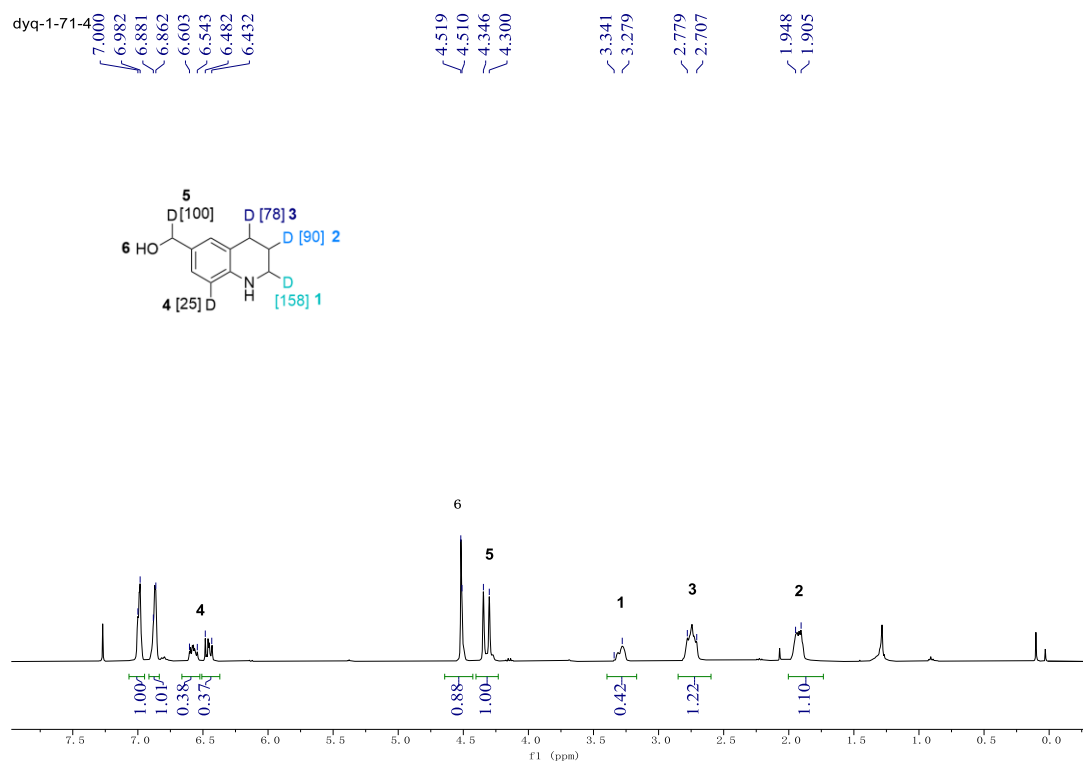

### <sup>13</sup>C NMR for 40b

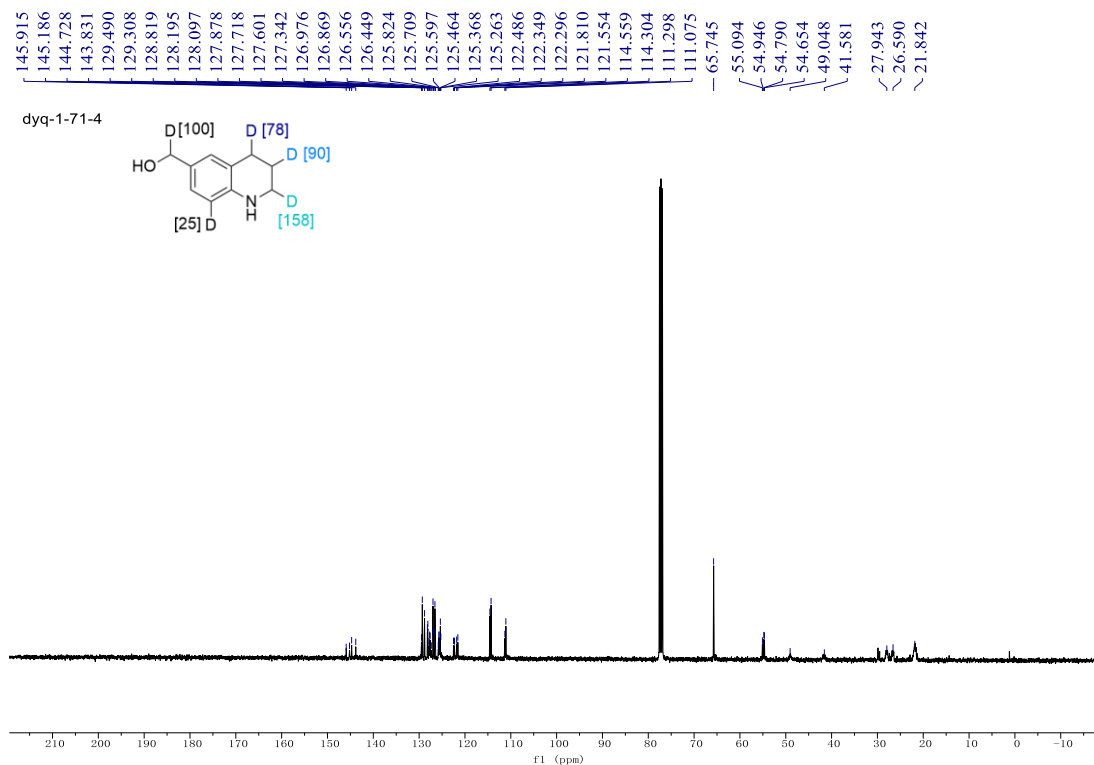

### <sup>1</sup>H NMR for 41b

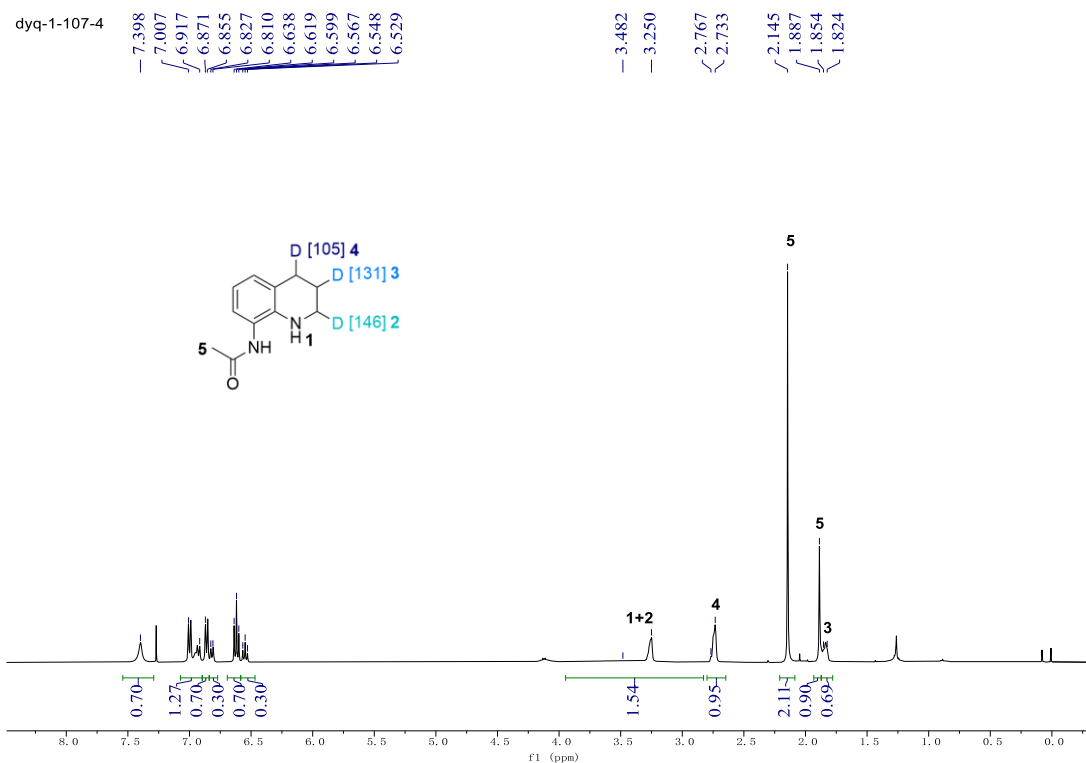

### <sup>13</sup>C NMR for 41b

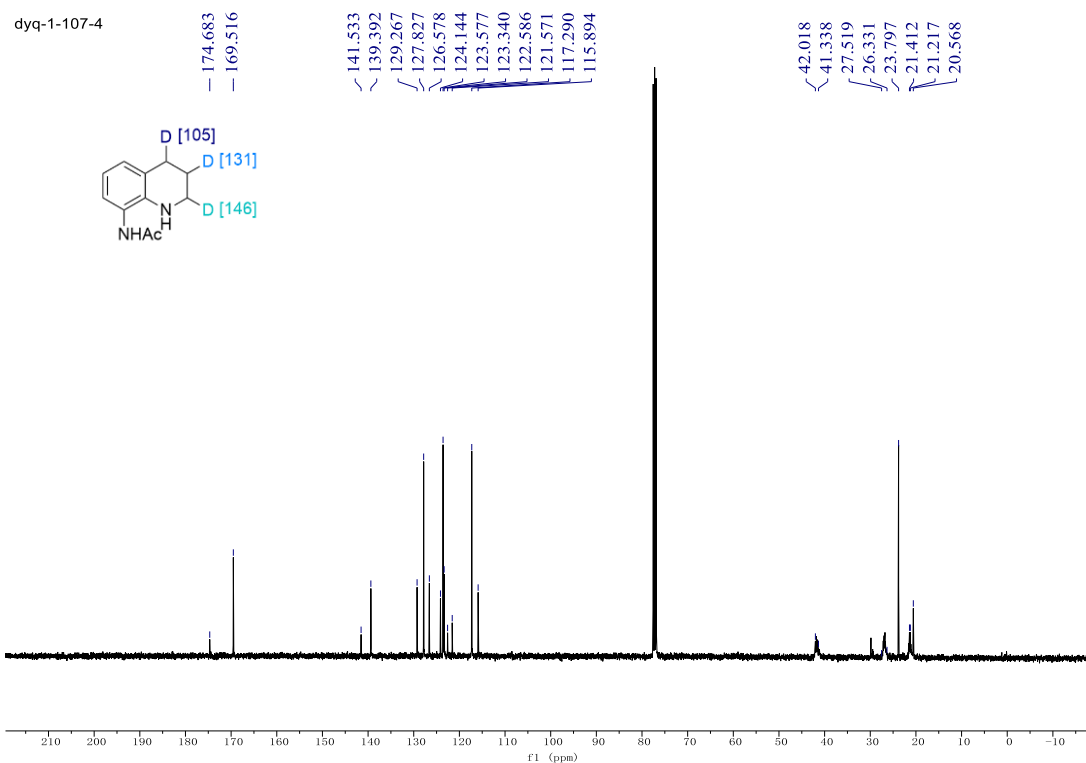

### <sup>1</sup>H NMR for 42b

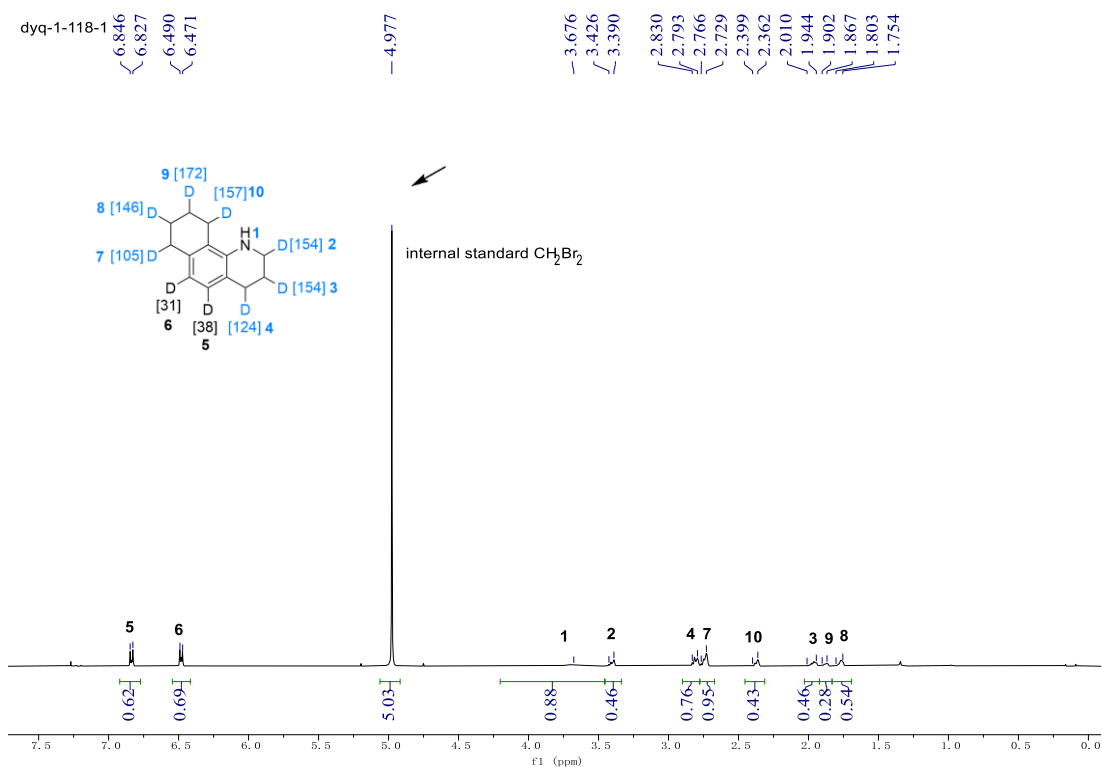

# <sup>13</sup>C NMR for 42b

dyq-1-118-1

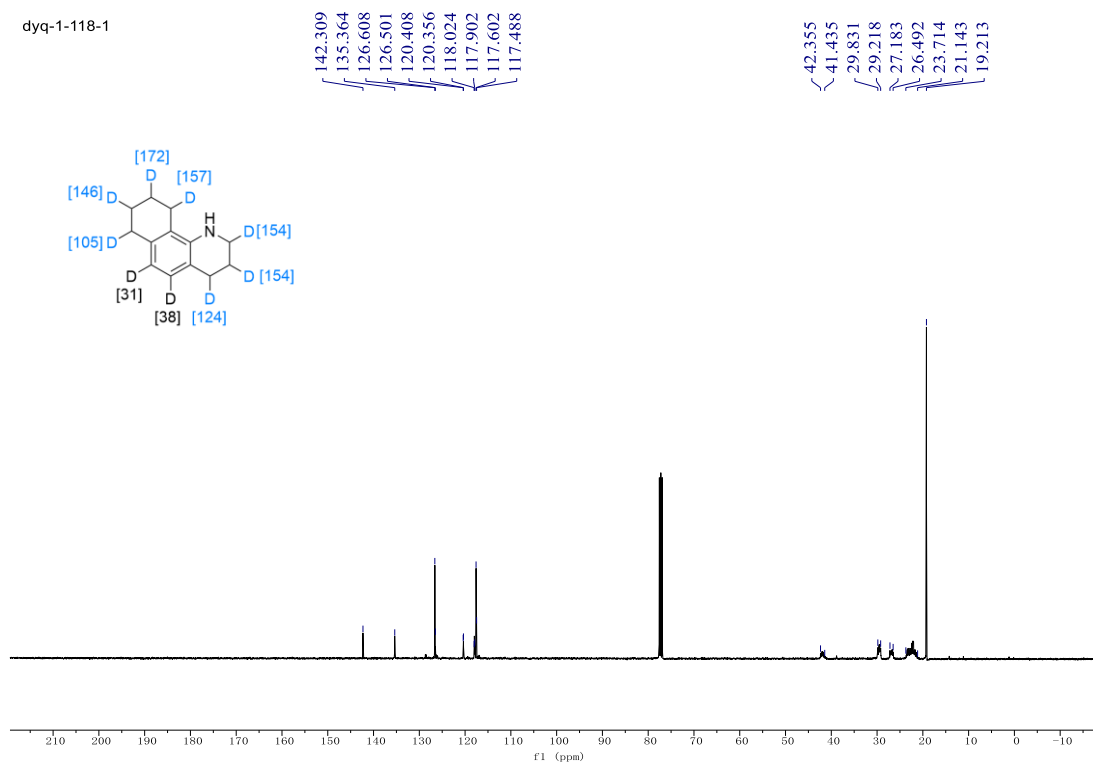

# <sup>1</sup>H NMR for 43b

dyq-1-52-2

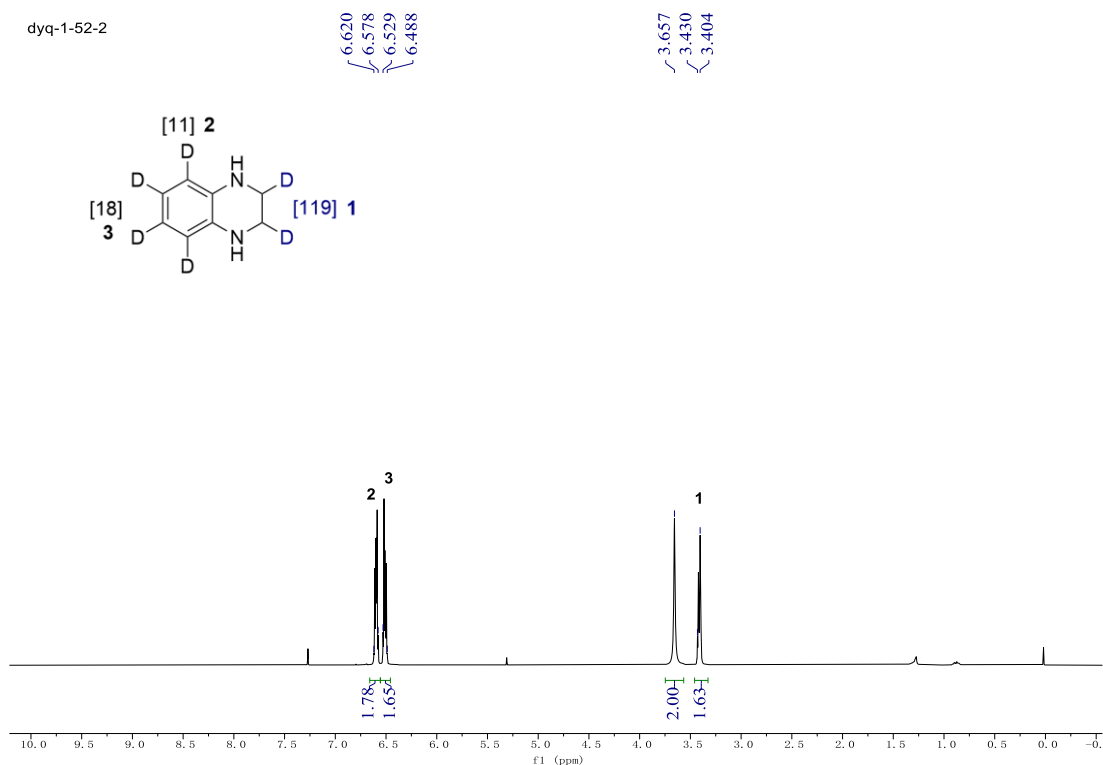



# <sup>13</sup>C NMR for 43b

dyq-1-52-2

133.804

118.990  
114.950

41.460  
40.917

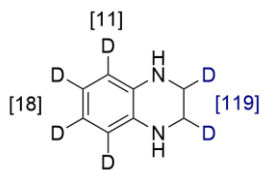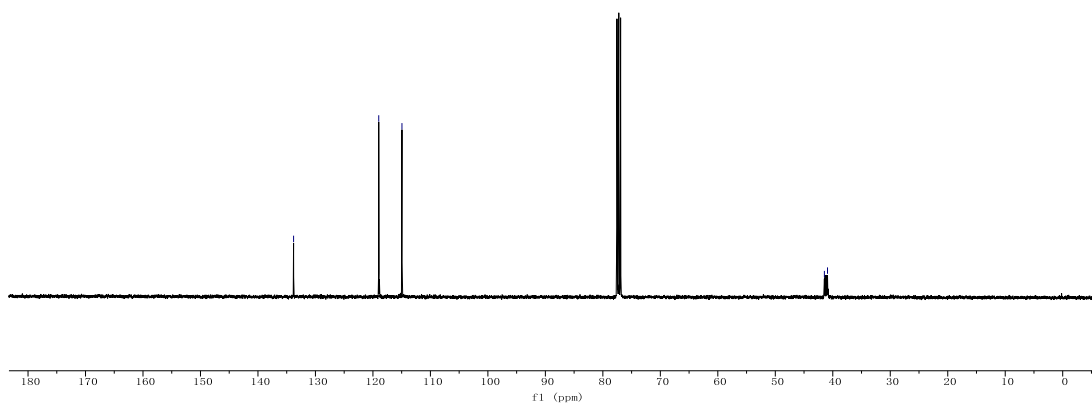

# <sup>1</sup>H NMR for 44b

dyq-1-113-2

6.561  
6.511  
6.435  
6.412

3.473  
3.390

2.193  
2.102

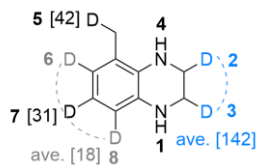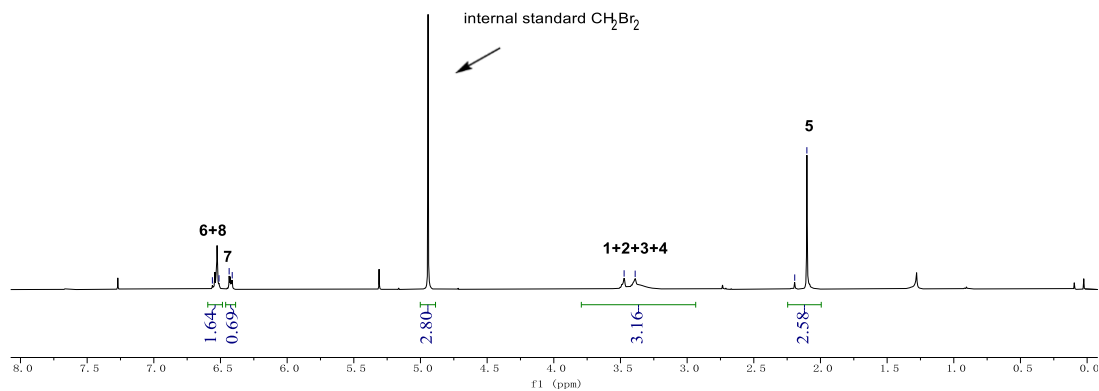

# <sup>13</sup>C NMR for 44b

dyq-1-113-2

133.198  
131.821  
126.021  
124.427  
122.796  
122.385  
120.695  
120.581  
118.196  
118.084  
113.172

41.962  
40.449

17.685  
17.478  
17.113

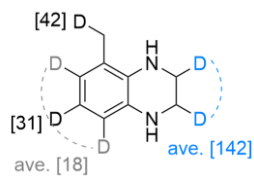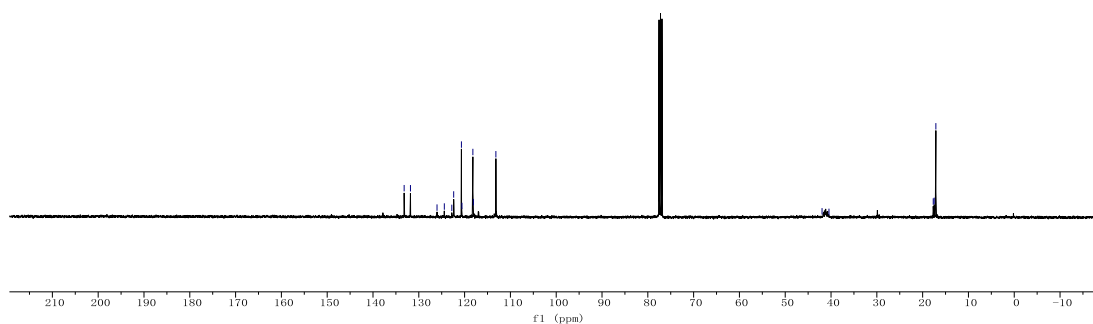

# <sup>1</sup>H NMR for 45b

dyq-1-36-2

7.857  
7.845

6.891  
6.751  
6.731

3.909

3.310  
3.262  
2.955  
2.901

2.038  
1.974

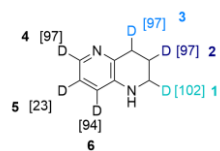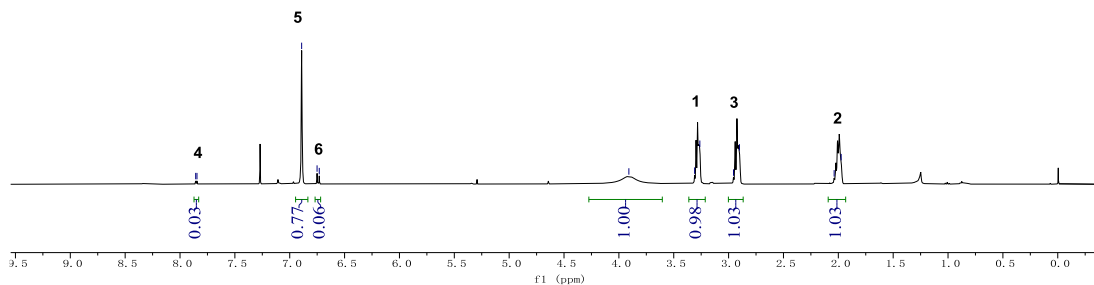

### <sup>13</sup>C NMR for 45b

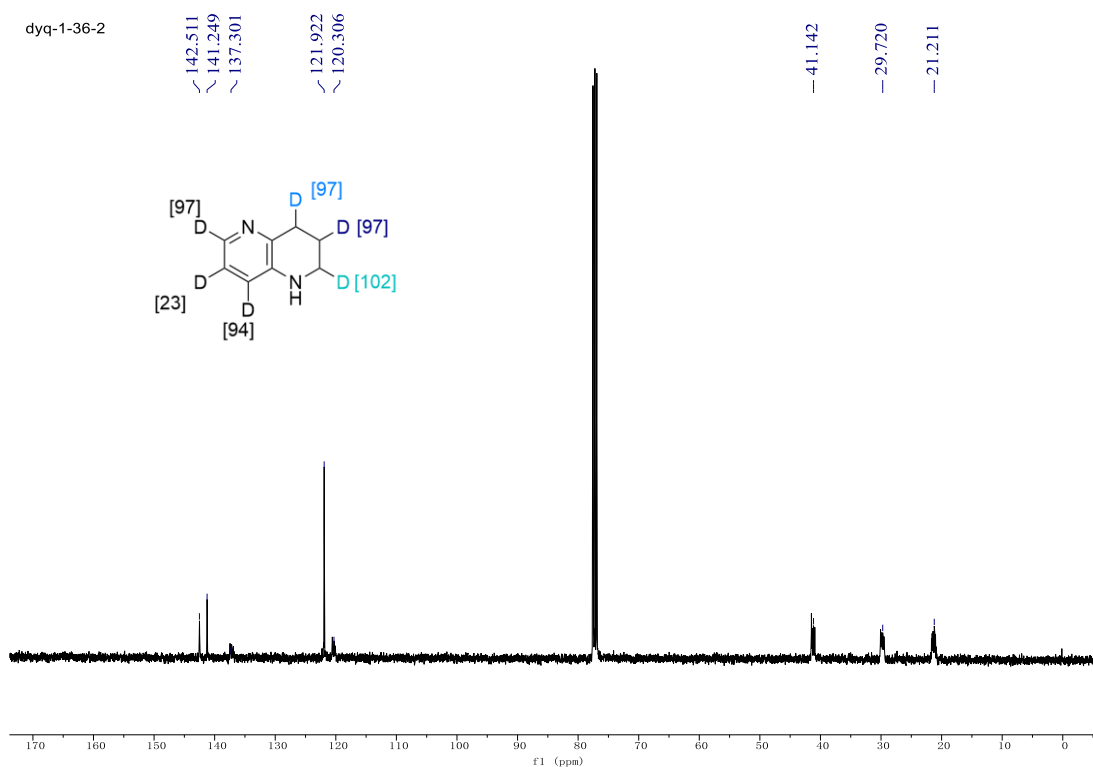

### <sup>1</sup>H NMR for 46b

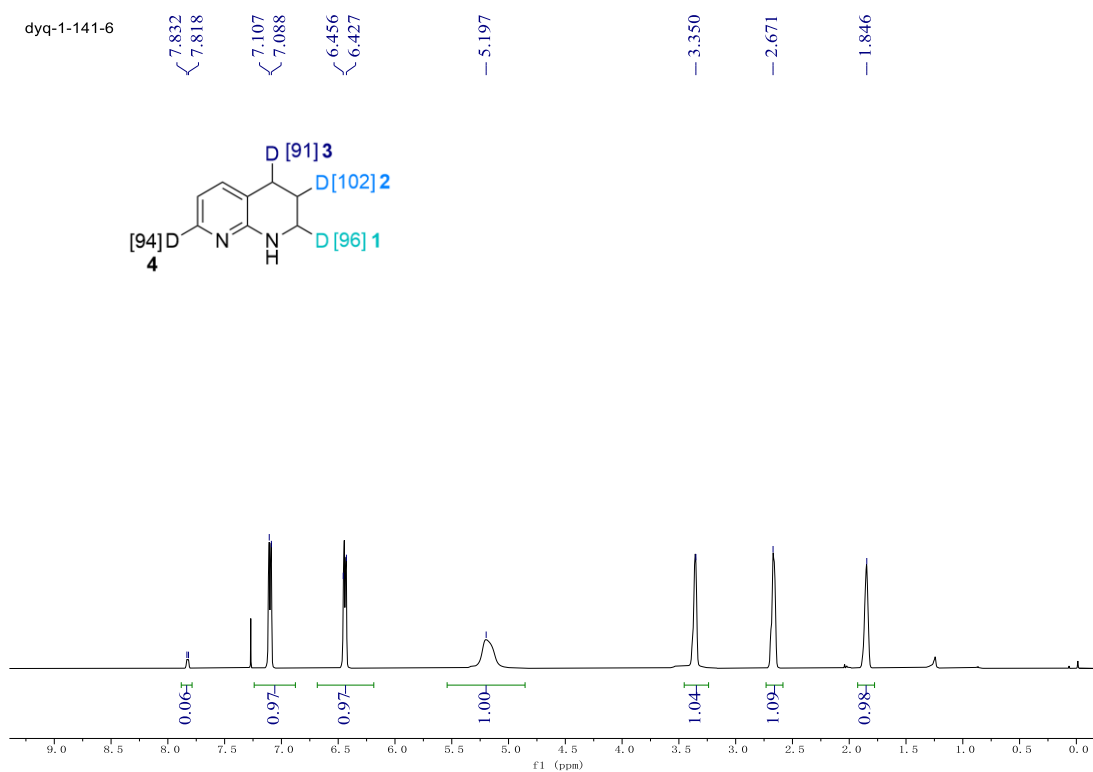

# <sup>13</sup>C NMR for 46b

dyq-1-141-6

156.493  
145.968  
145.913  
145.648  
145.382  
136.235  
116.161  
116.106  
112.551  
112.407  
41.519  
40.971  
26.670  
26.113  
21.167  
20.506

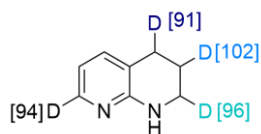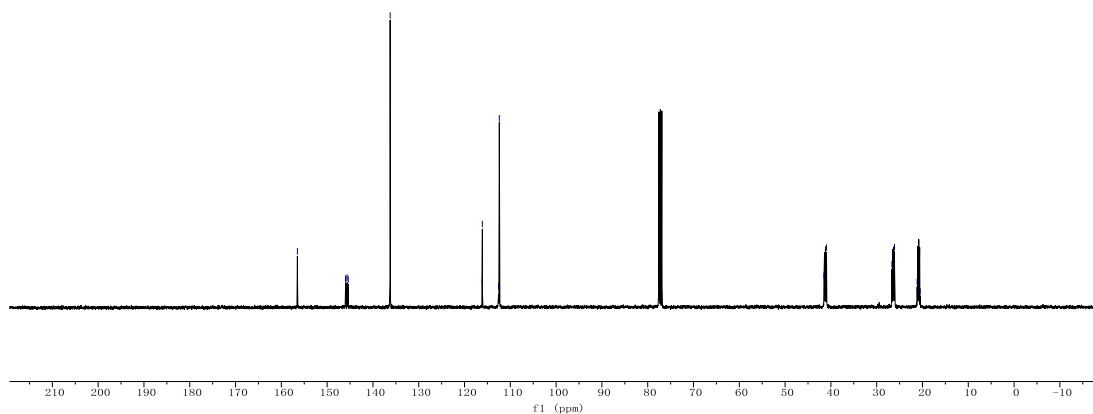

# <sup>1</sup>H NMR for 47b

dyq-1-116-4

6.877  
3.283  
3.253  
2.328  
2.298  
1.778  
1.688

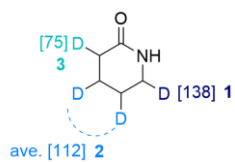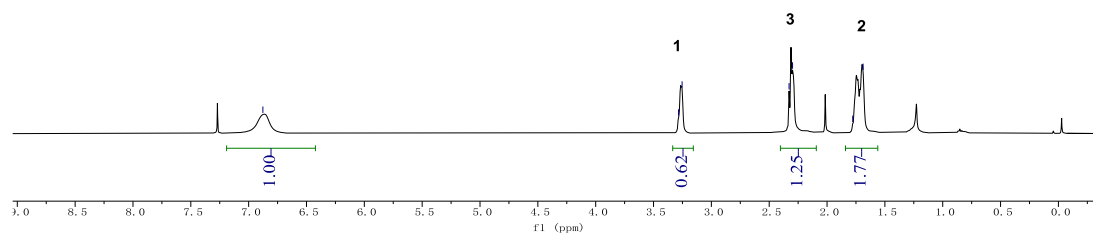

### <sup>13</sup>C NMR for 47b

dyq-1-116-4

172.938

42.170  
41.744  
31.487  
30.969  
21.990  
21.422  
20.584  
20.150

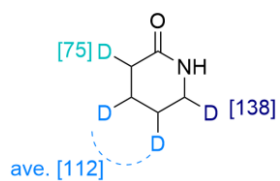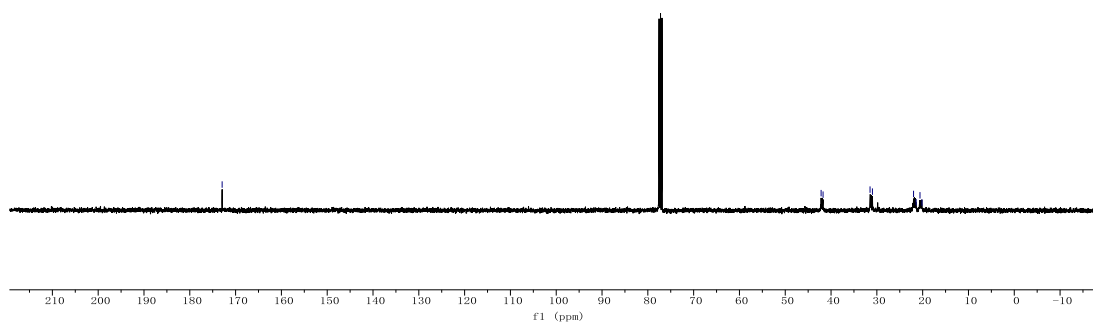

### <sup>1</sup>H NMR for 48b

bfx-8-179-1

3.569  
3.375

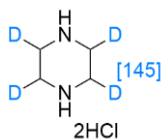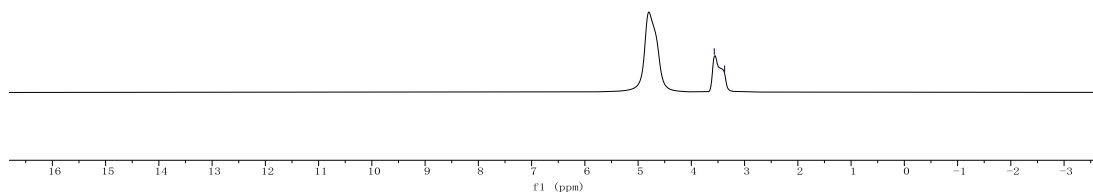

# <sup>13</sup>C NMR for 48b

bfx-8-179-1

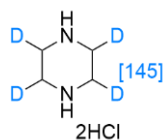

39.905

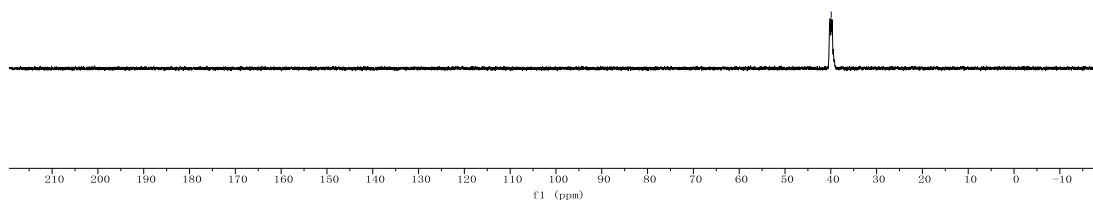

# <sup>1</sup>H NMR for 49b

dyq-1-122-1

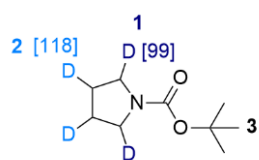

3.299  
3.229

1.785  
1.439

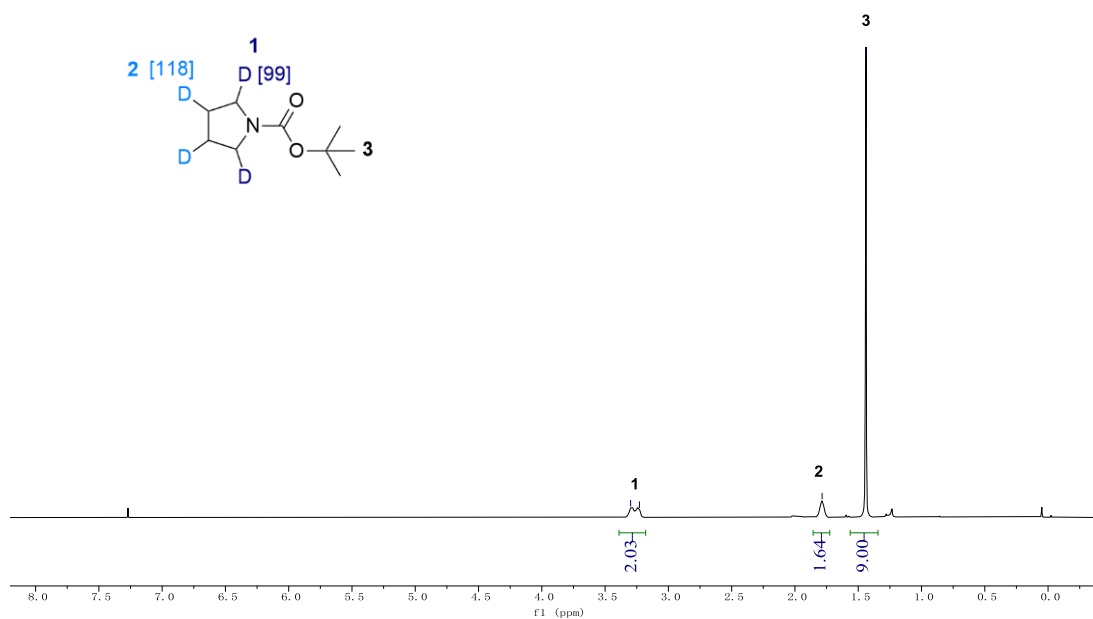

# <sup>13</sup>C NMR for 49b

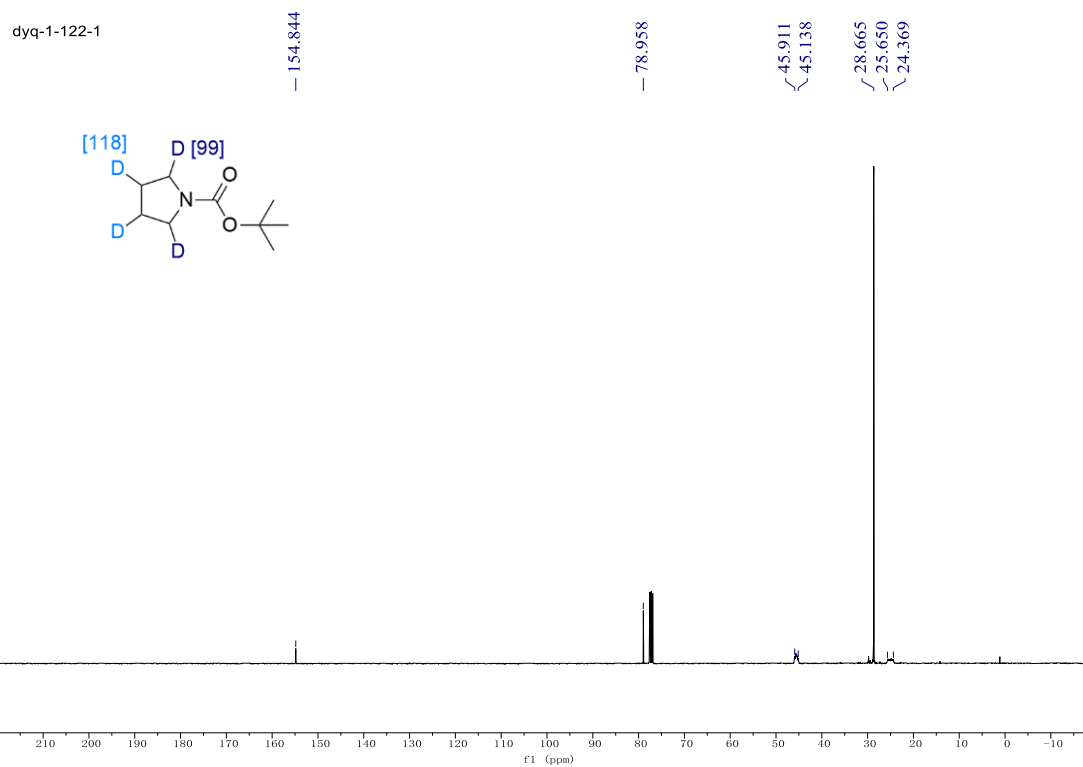

# <sup>1</sup>H NMR for 50b

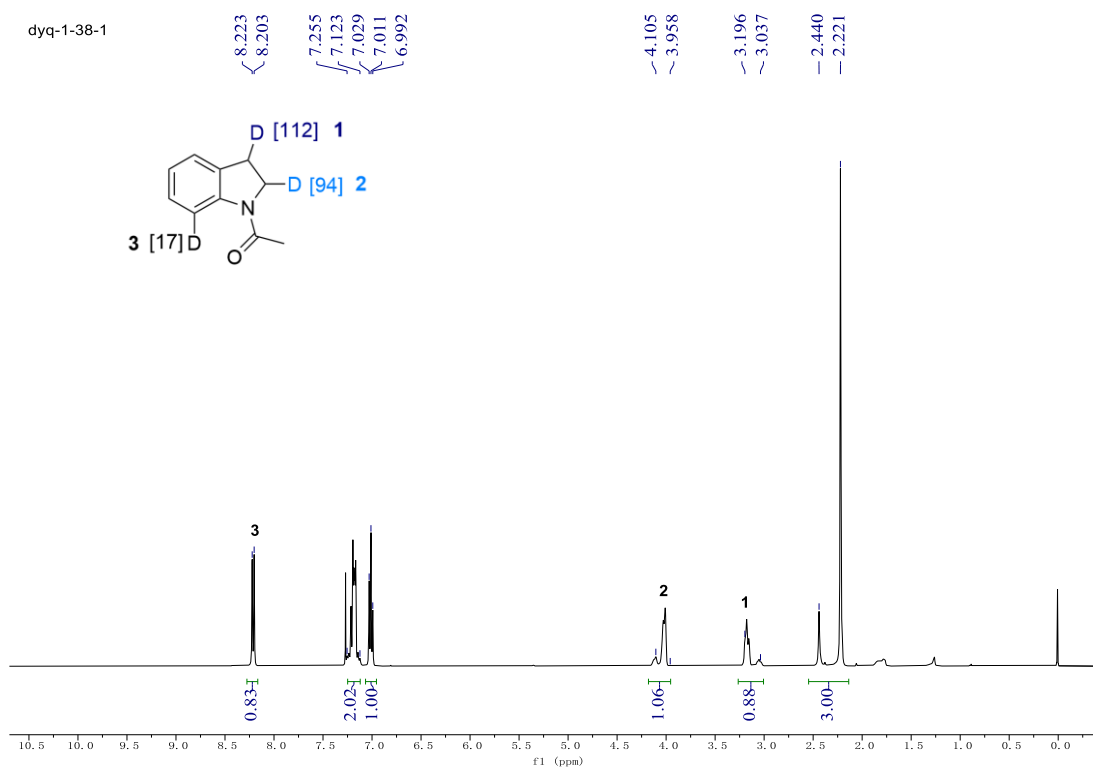

### <sup>13</sup>C NMR for 50b

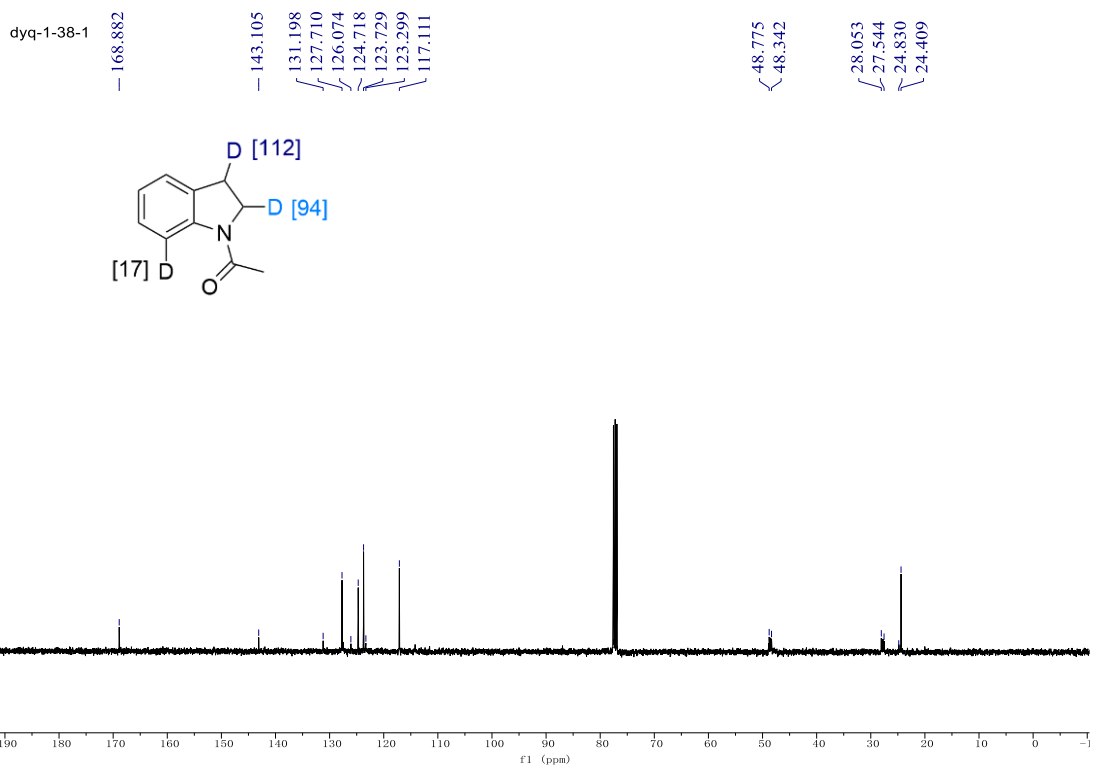

### <sup>1</sup>H NMR for 51b

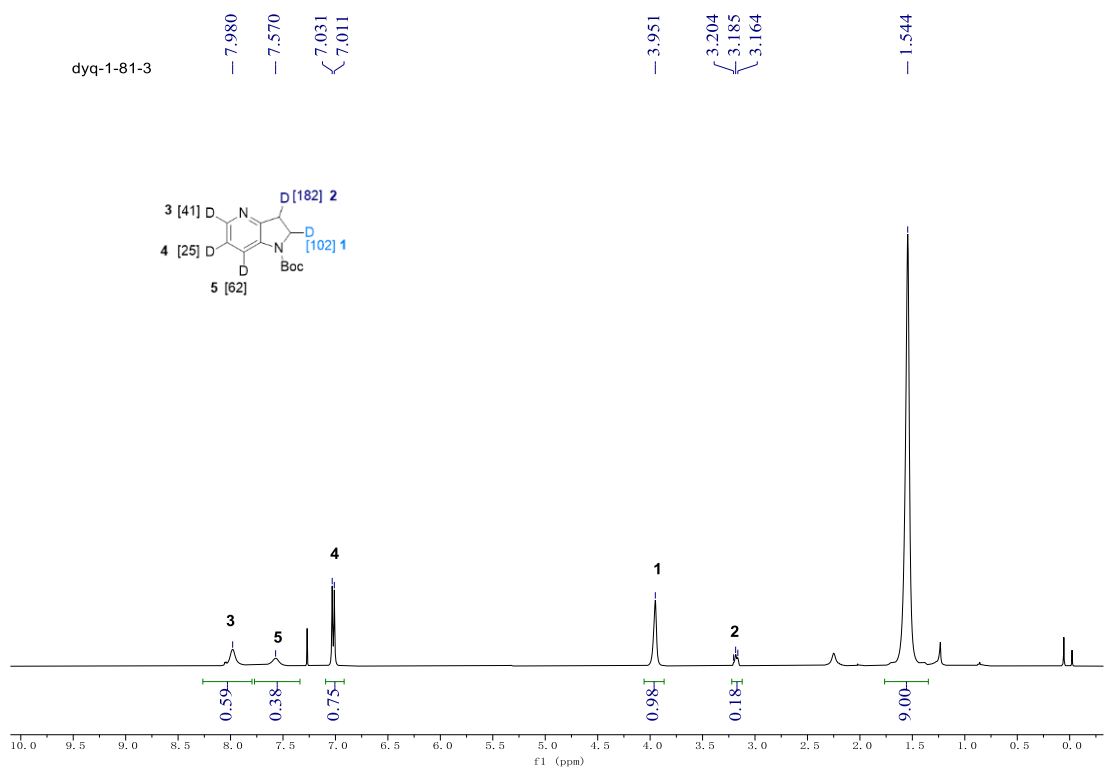



### <sup>13</sup>C NMR for 51b

lelaiwen-000044 (81-3)  
800 MHz

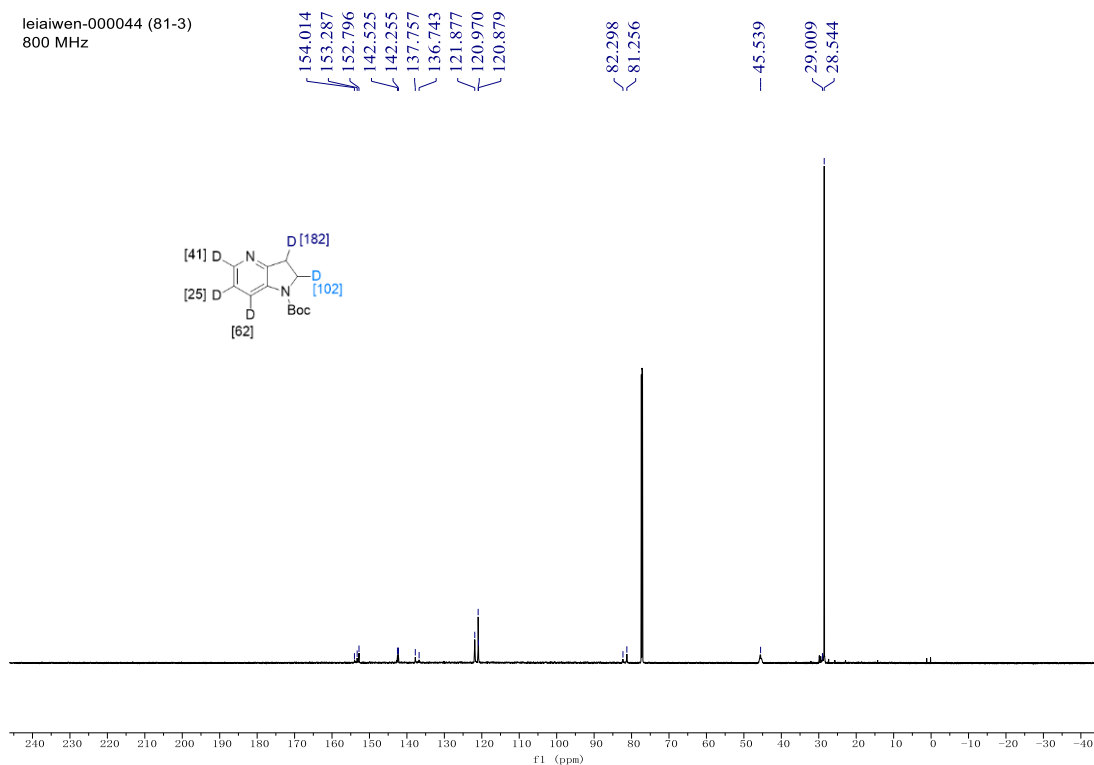

### <sup>1</sup>H NMR for 52b

dyq-1-83-3

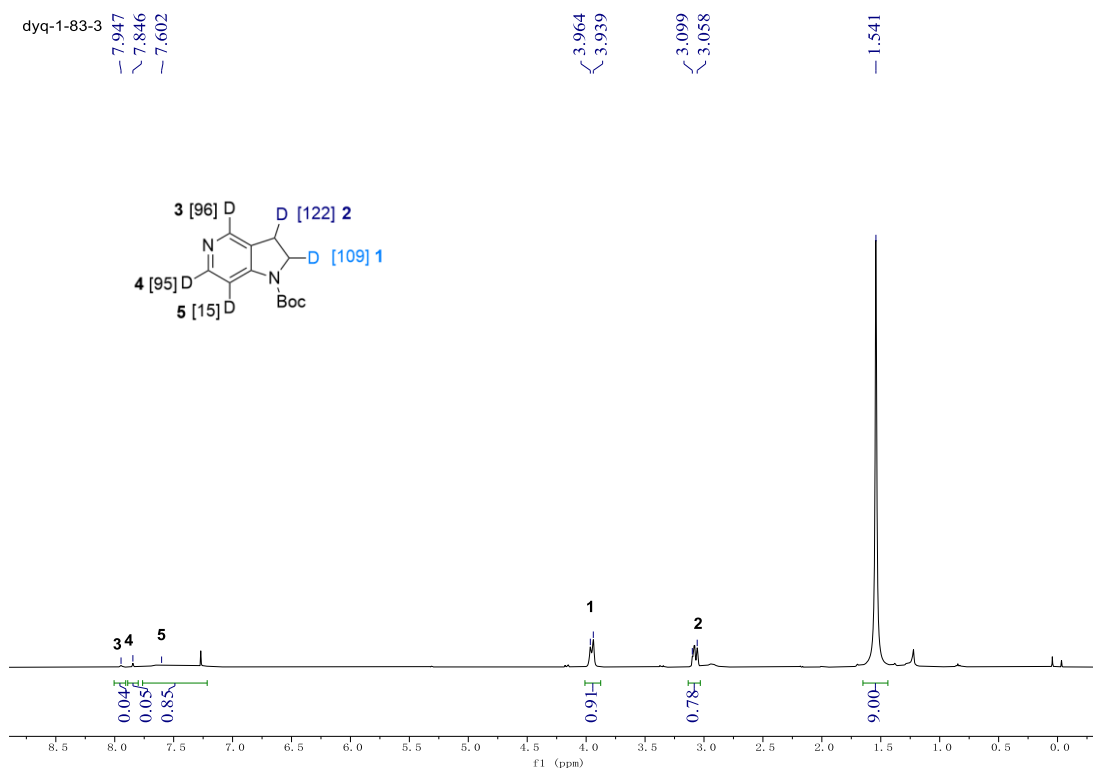

### <sup>13</sup>C NMR for 52b

dyq-1-83-3

152.235  
149.276  
148.738  
145.562  
145.041

126.955

109.436

81.965

47.735  
47.299

28.422  
24.594

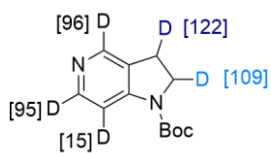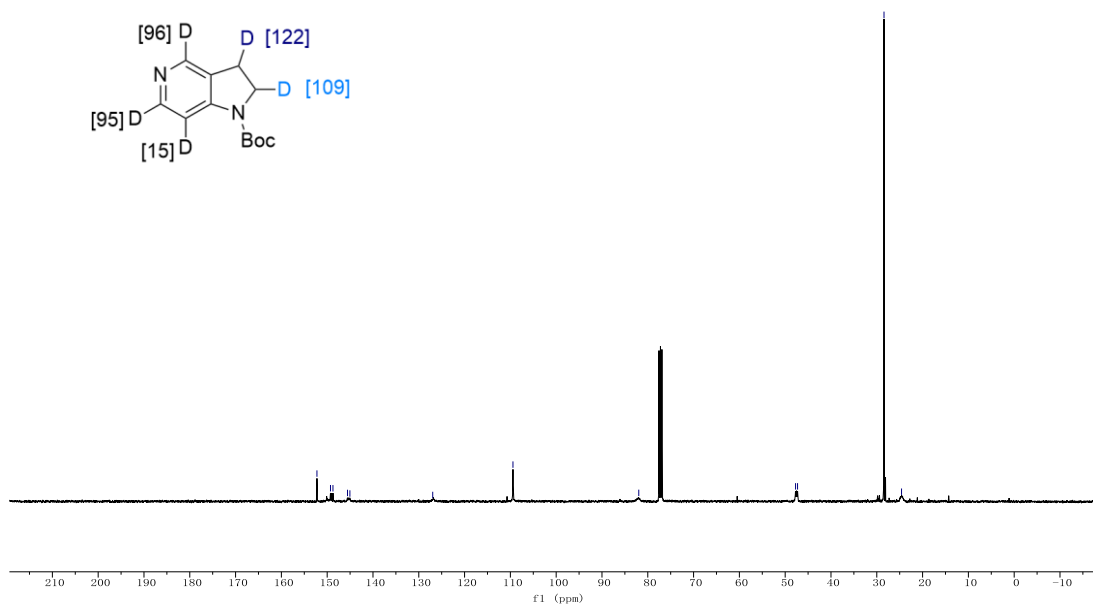

### <sup>1</sup>H NMR for 53b

dyq-1-81-1

9.030

8.668

8.179  
8.168

7.088

3.960  
3.935

3.106  
3.064

1.565

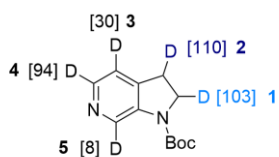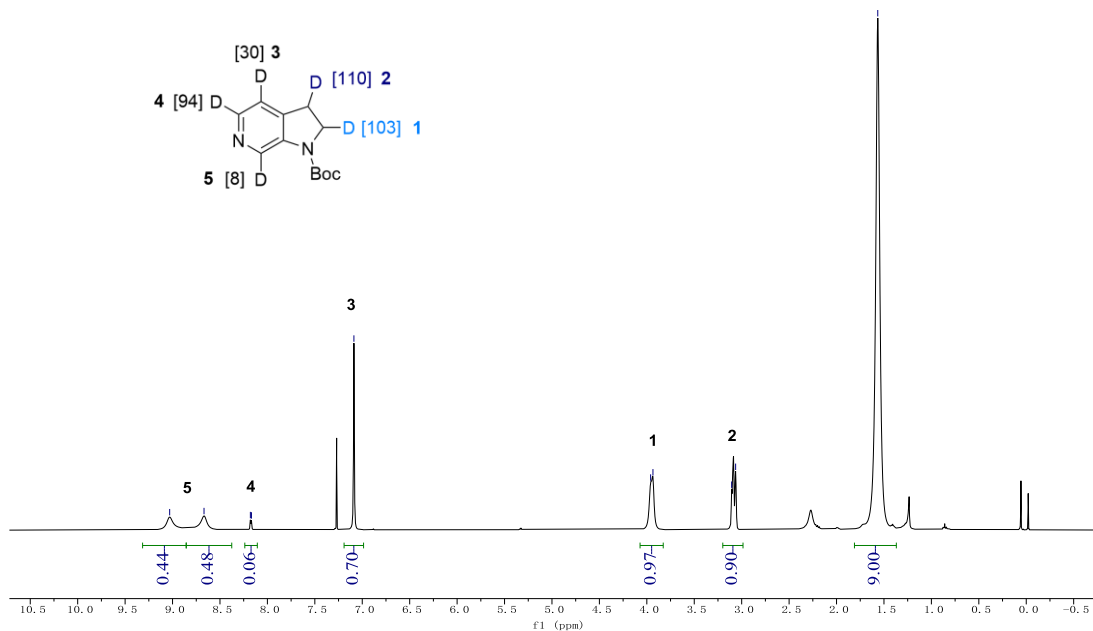

# <sup>13</sup>C NMR for 53b

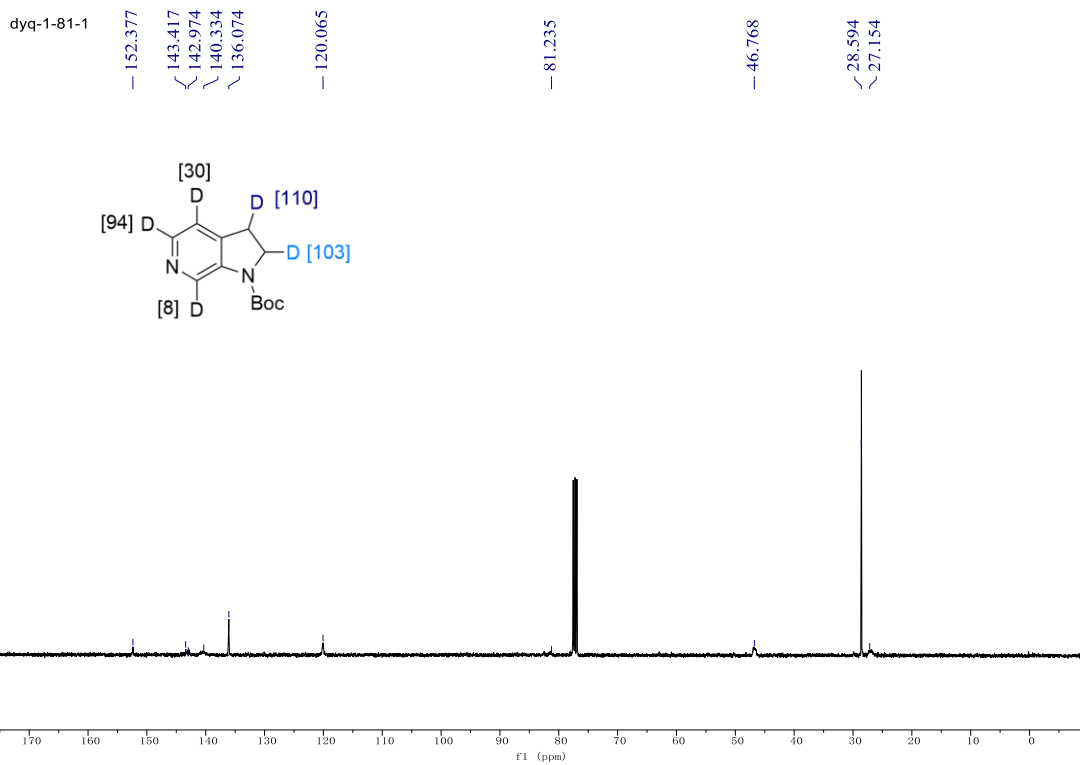

# <sup>1</sup>H NMR for 54b

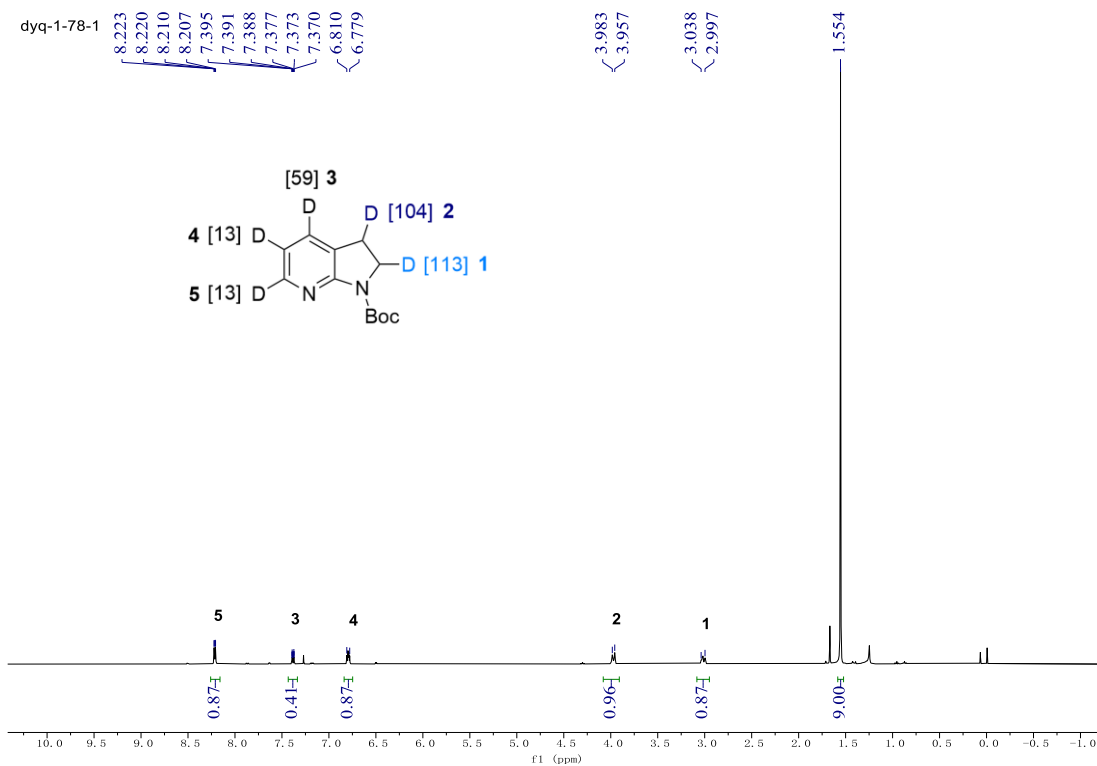

# <sup>13</sup>C NMR for 54b

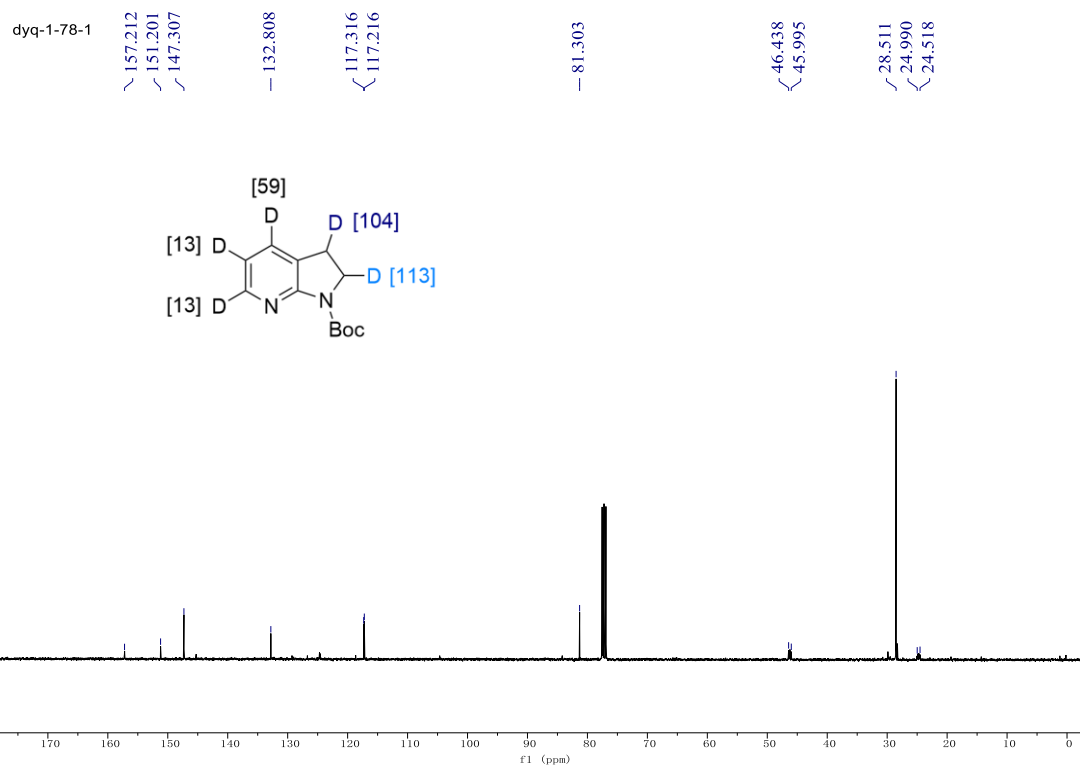

# <sup>1</sup>H NMR for 1d

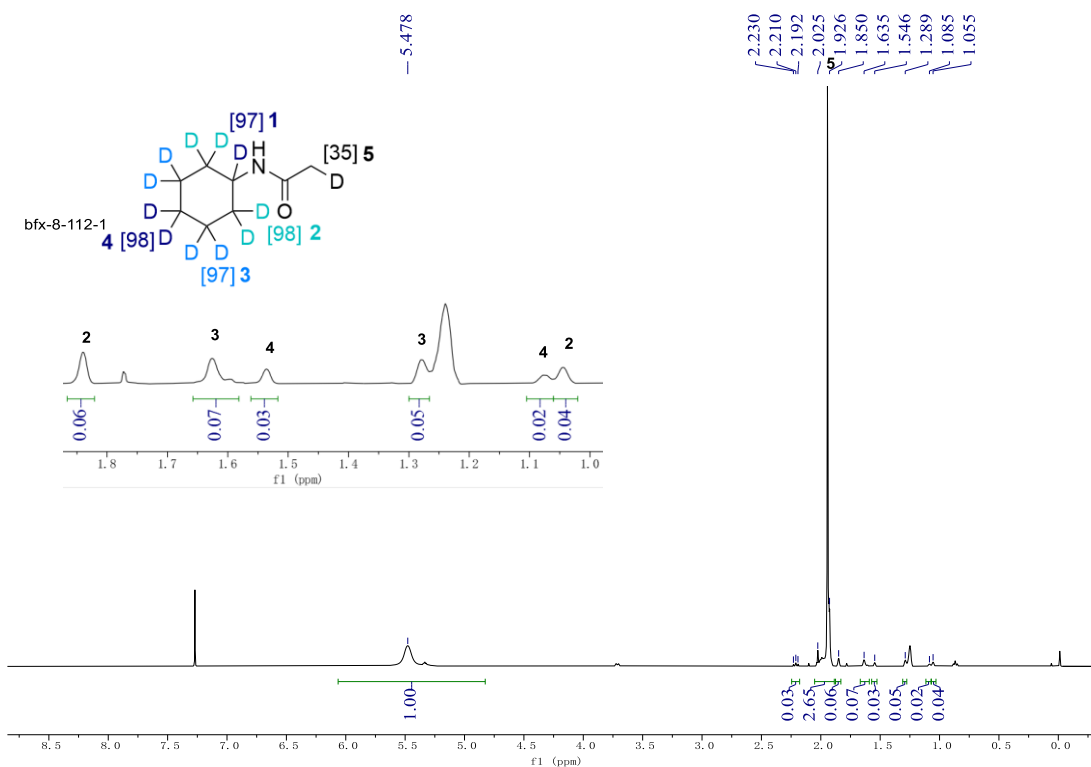

# <sup>13</sup>C NMR for 1d

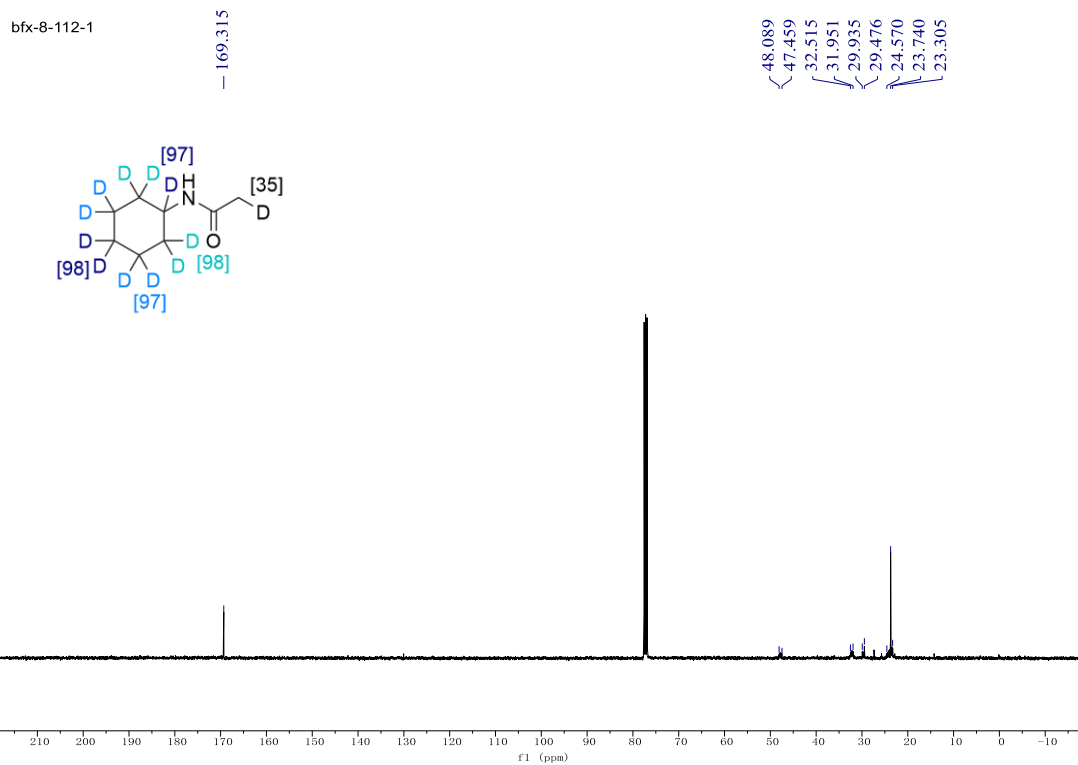

# <sup>1</sup>H NMR for 2d

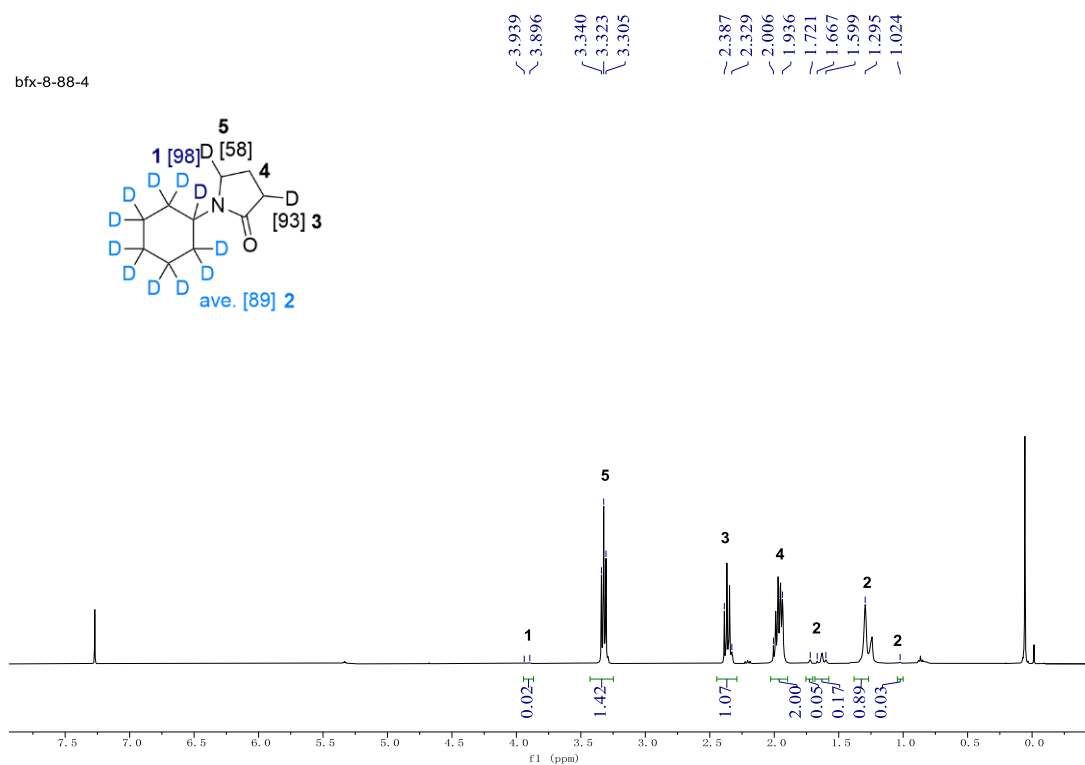

# <sup>13</sup>C NMR for 2d

bfx-8-88-4

174.416

49.892  
43.010  
31.832  
31.723  
31.317  
29.902  
29.516  
24.536  
18.354  
18.251  
18.137

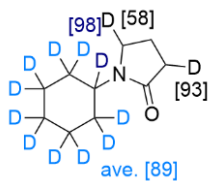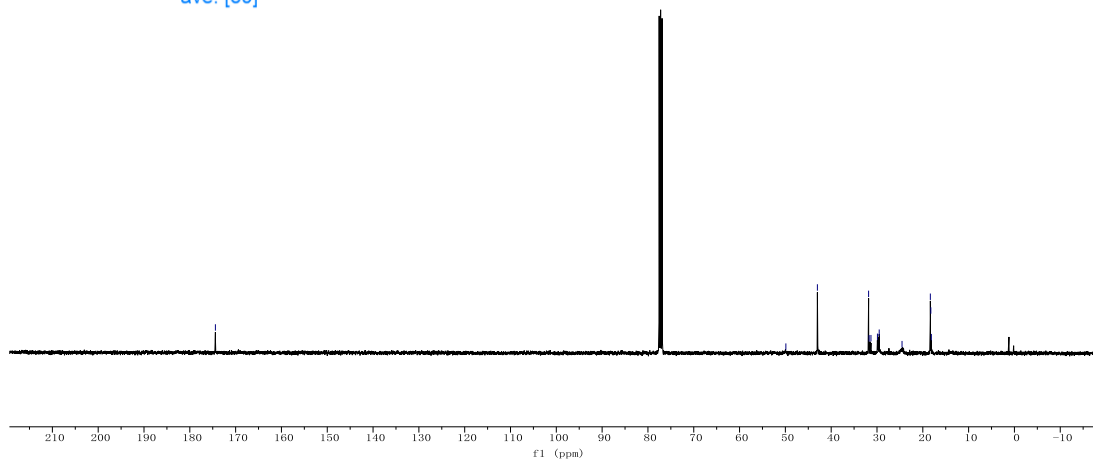

# <sup>1</sup>H NMR for 3d

bfx-8-88-6

2.227  
2.172  
1.682  
1.638  
1.596  
1.581  
1.484  
1.464  
1.440

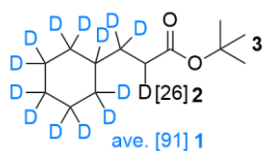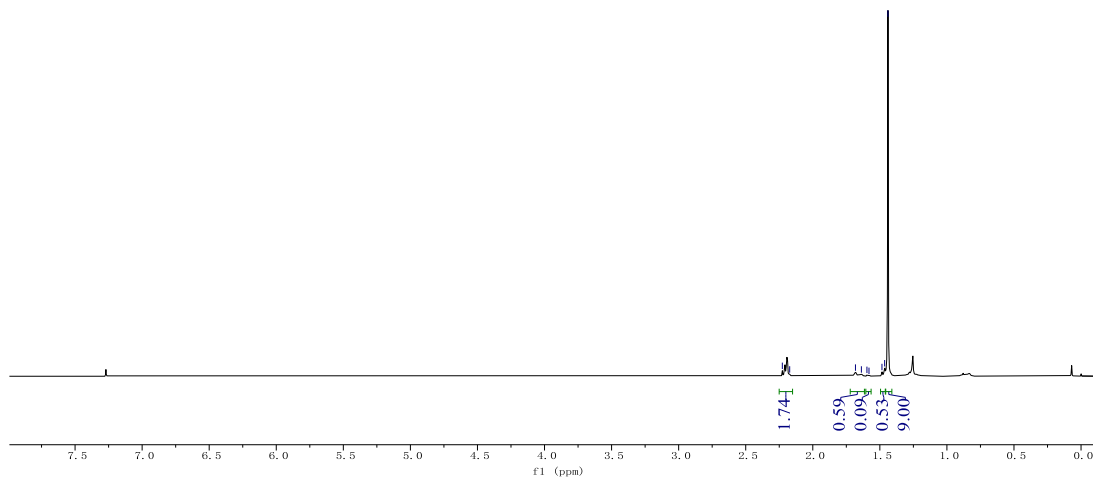

# <sup>13</sup>C NMR for 3d

bfx-8-88-6

— 173.947

— 80.082

33.300  
32.137  
29.916  
28.301  
25.679

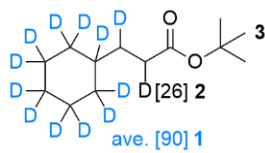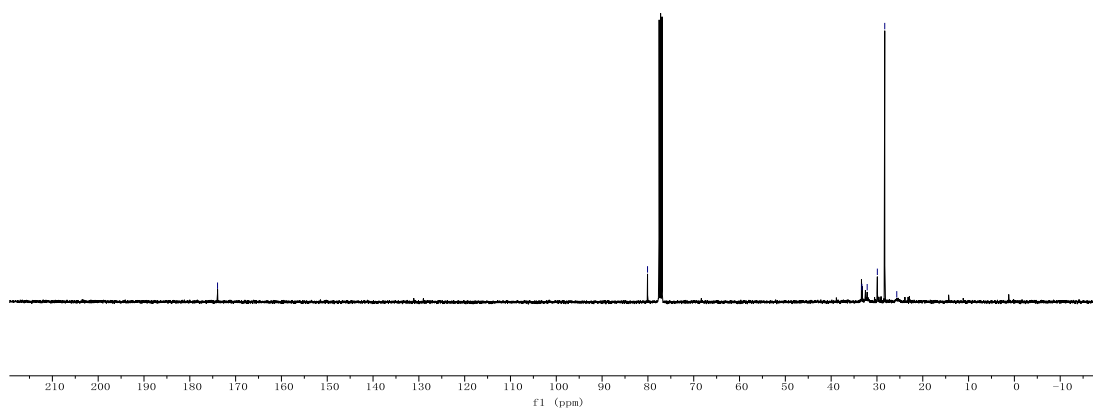

# <sup>1</sup>H NMR for 4d

bfx-8-96-2

— 4.114

2.654  
2.598

1.668  
1.611  
1.454  
1.181  
1.093  
0.894

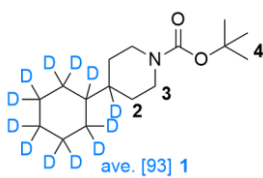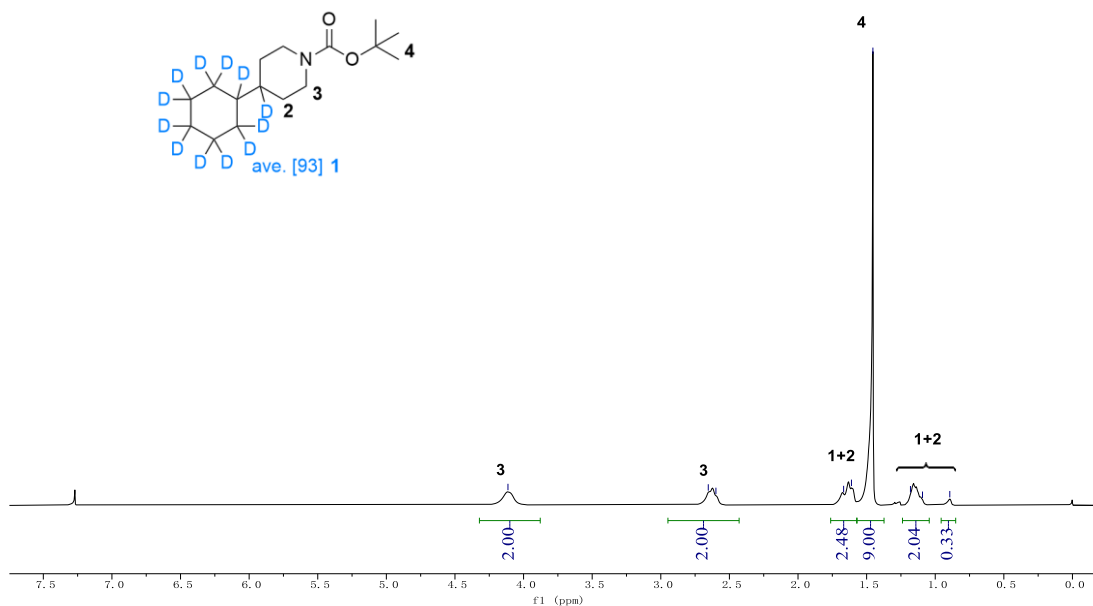

# <sup>13</sup>C NMR for 4d

bfx-8-96-2

— 155.119

— 79.304

45.071  
43.952  
41.841  
41.483  
40.844  
29.439  
29.327  
28.695  
26.246  
25.020

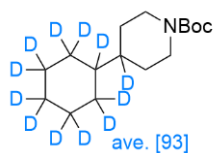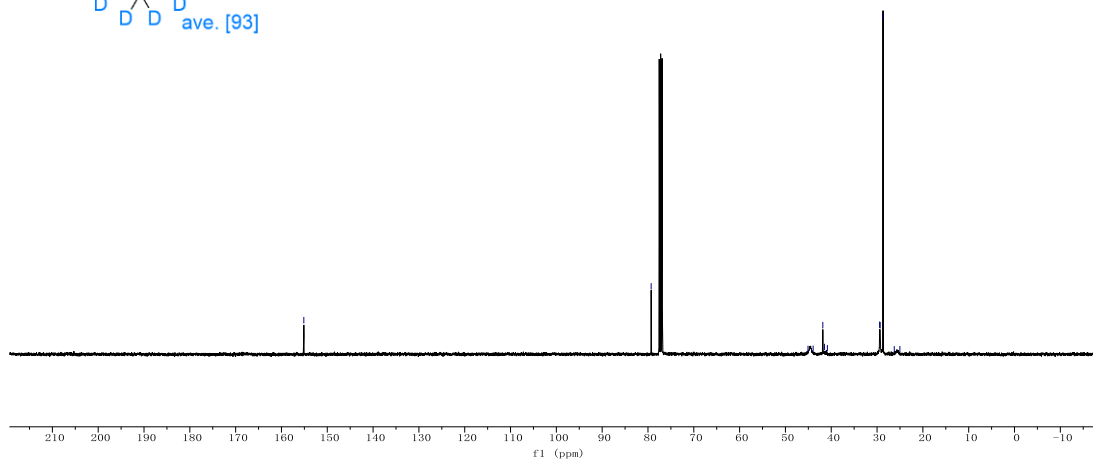

# <sup>1</sup>H NMR for 5d

dyq-1-148-1

3.765  
3.587  
3.298  
3.264

— 2.749

1.723  
1.631  
1.196  
1.120

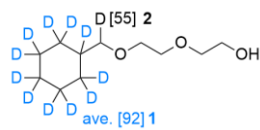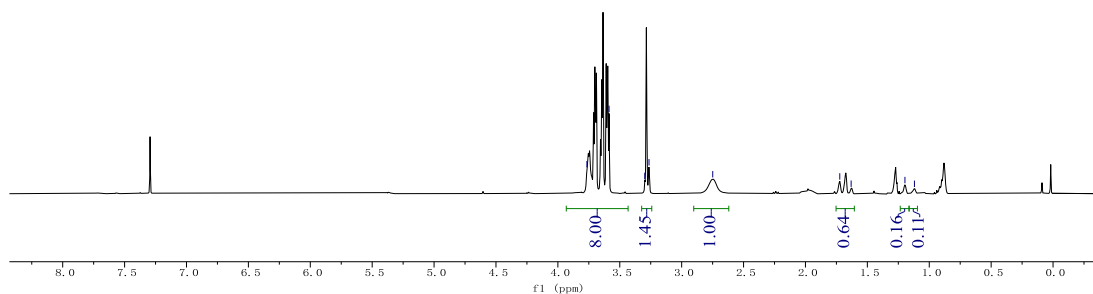



# <sup>13</sup>C NMR for 5d

dyq-1-148-1

72.632  
72.569  
72.504  
70.623  
70.571  
70.532  
70.496  
62.032  
61.598  
— 29.243  
— 25.040

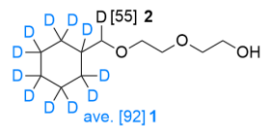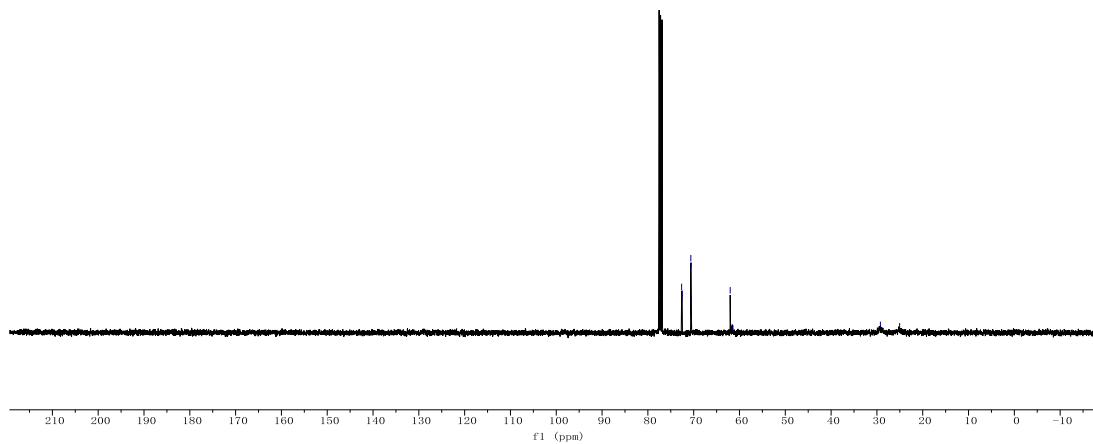

# <sup>1</sup>H NMR for 6d

bfx-8-81-3

— 5.651  
— 5.335  
3.266  
3.151  
2.048  
1.934  
1.636  
1.571  
1.381  
1.244  
1.141  
1.072

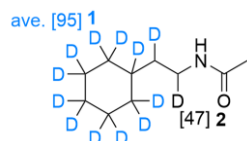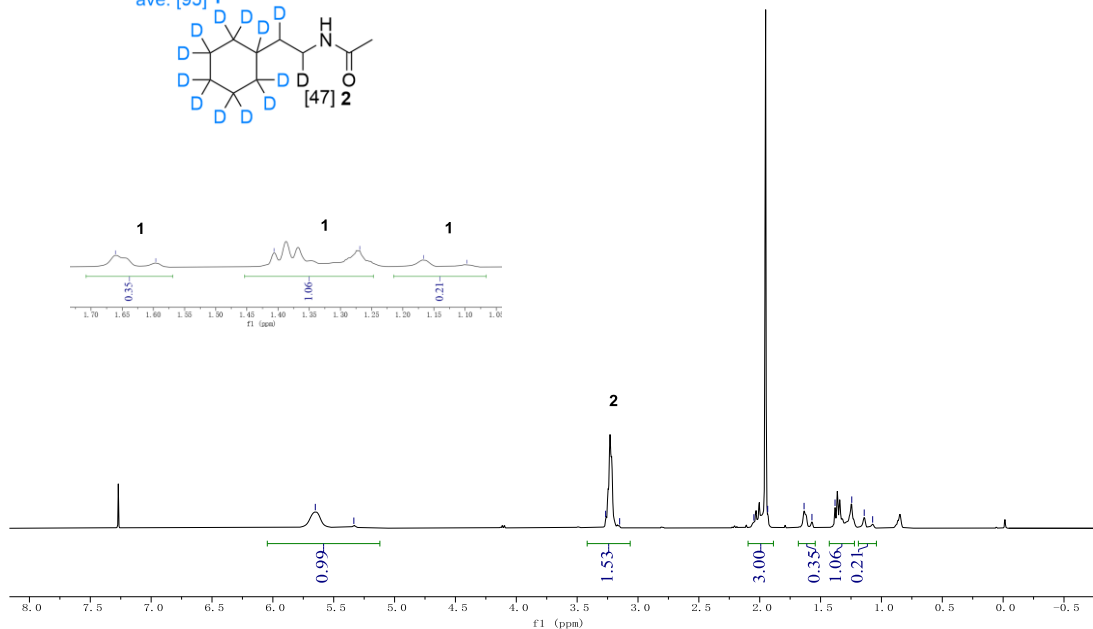

# <sup>13</sup>C NMR for 6d

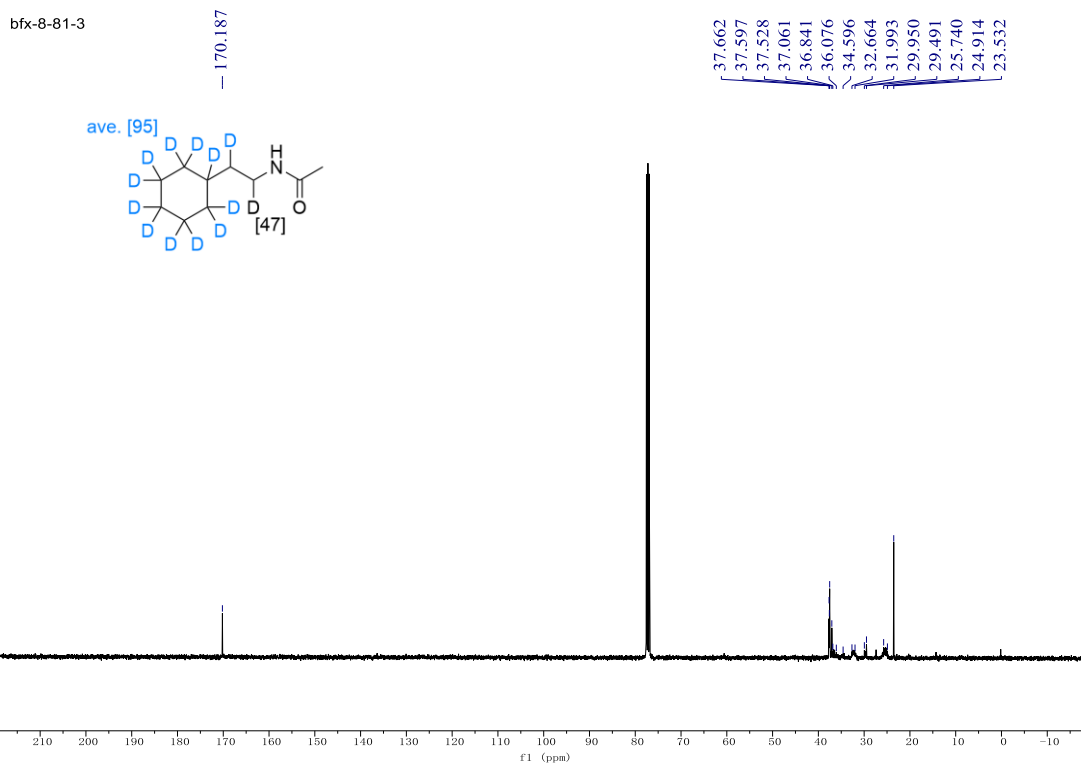

# <sup>1</sup>H NMR for 7d

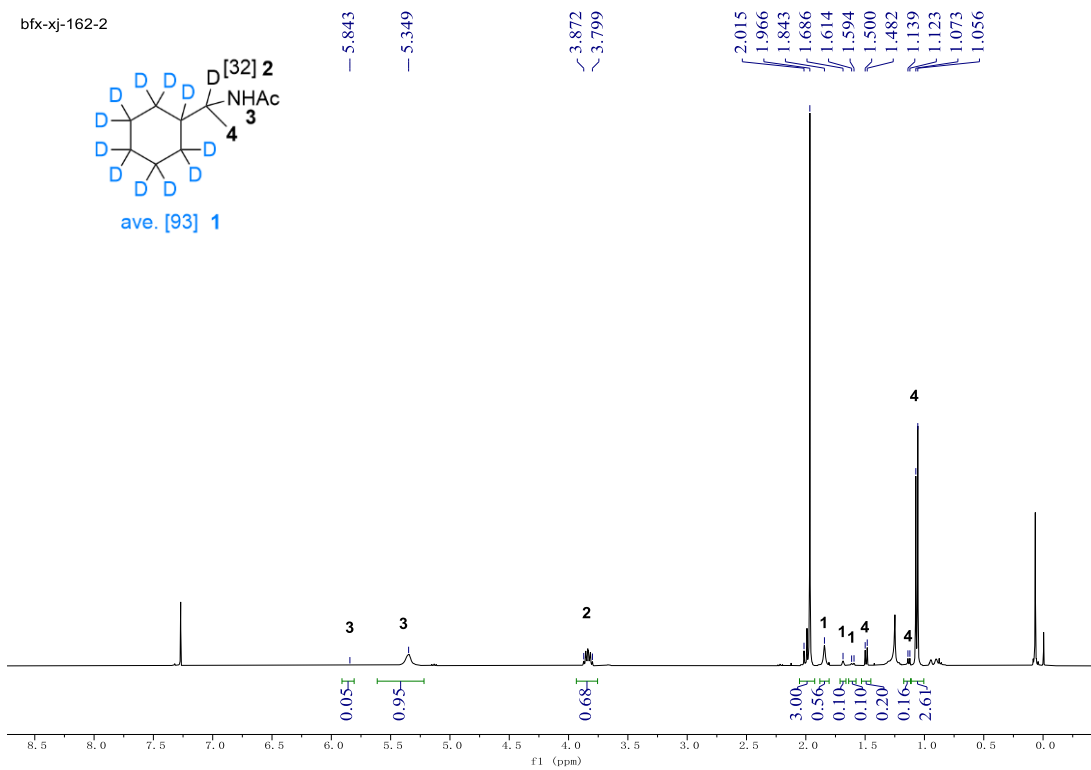

# <sup>13</sup>C NMR for 7d

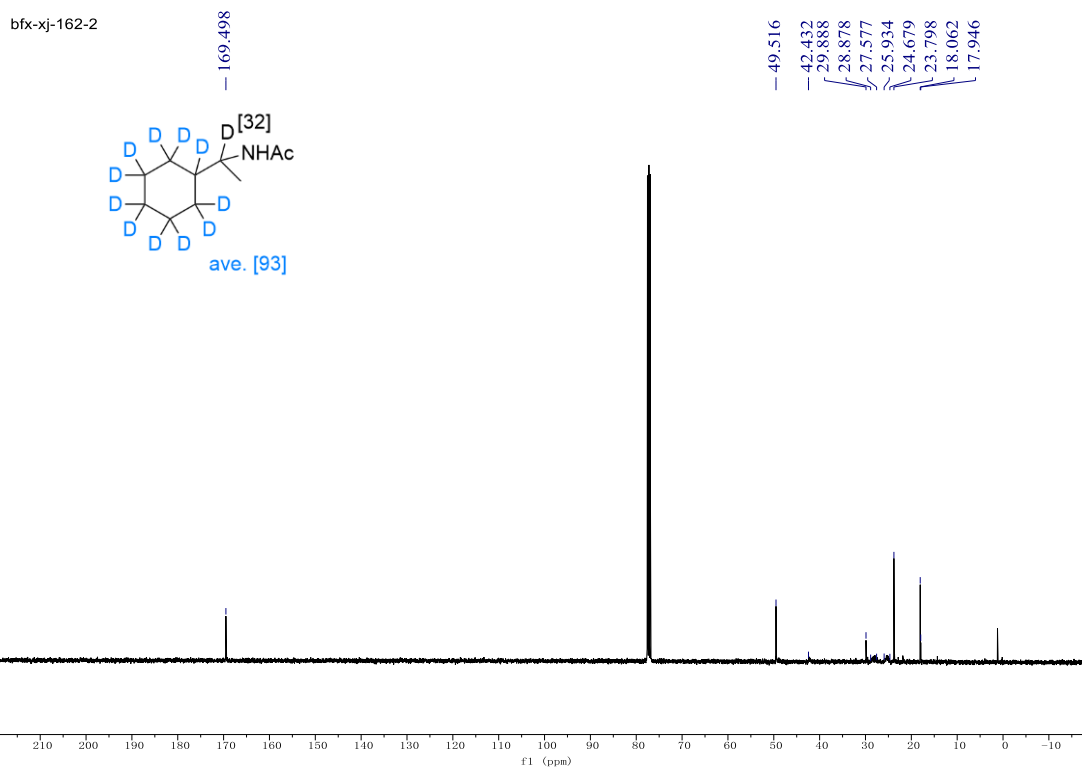

# <sup>1</sup>H NMR for 8d

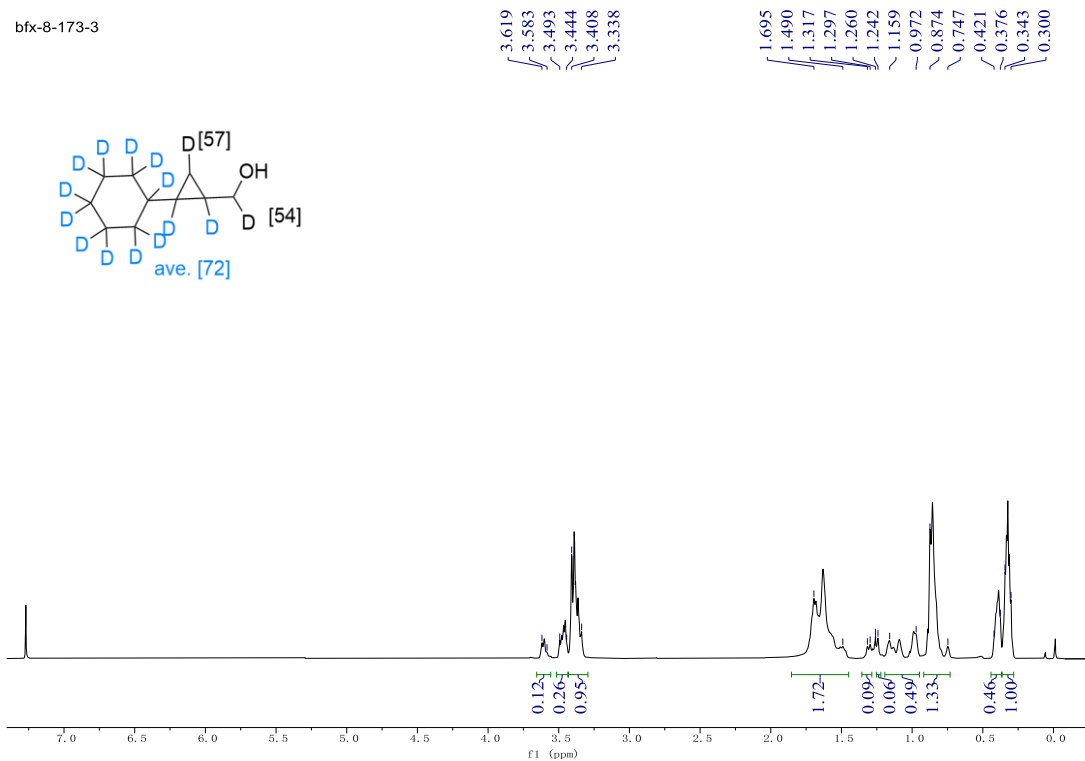

### $^{13}\text{C}$ NMR for 8d

bfx-8-173-3

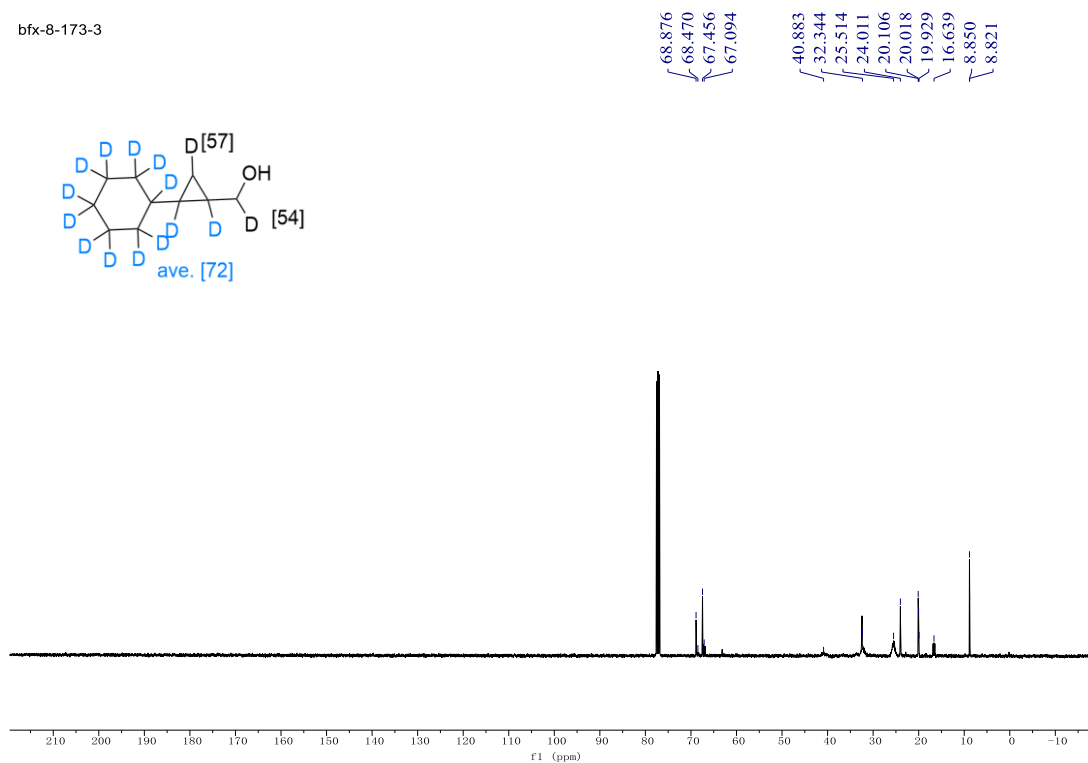

### $^1\text{H}$ NMR for 10d

bfx-8-138-1

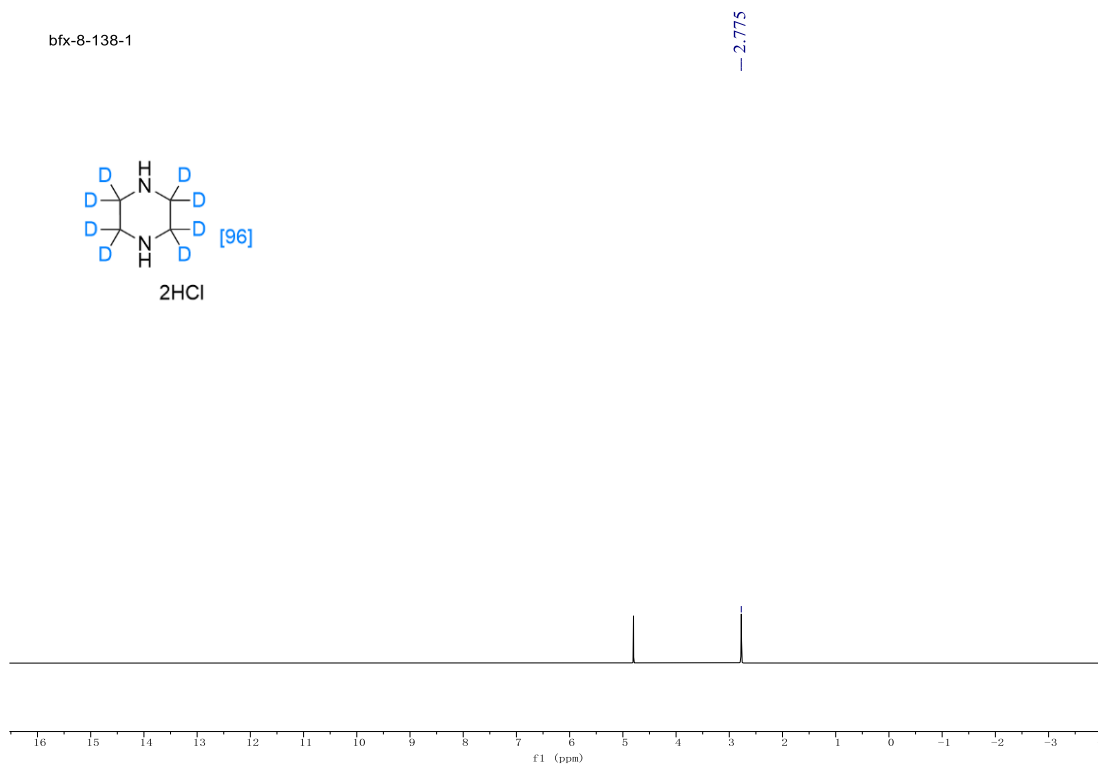

# <sup>13</sup>C NMR for 10d

bfx-8-138-1

— 34.678

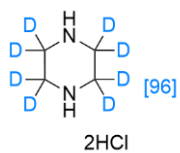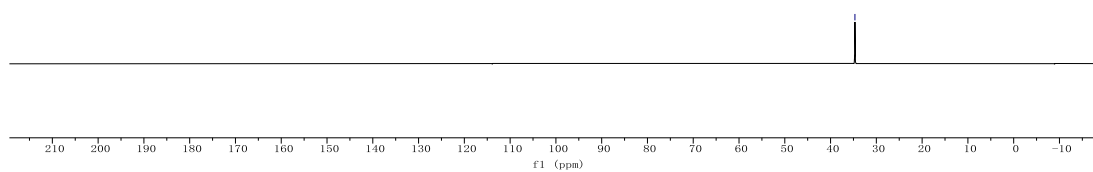

# <sup>1</sup>H NMR for 1f

dyq-1-144-3

— 7.145

— 6.628

— 2.006

— 1.622

— 1.534

— 1.128

— 1.062

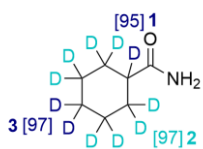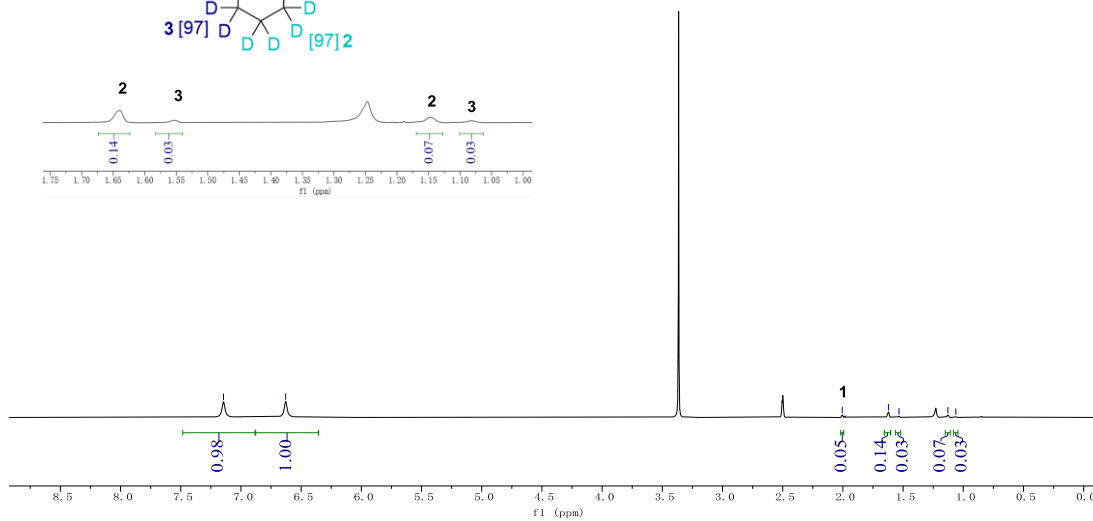

# <sup>13</sup>C NMR for 1f

dyq-1-144-3

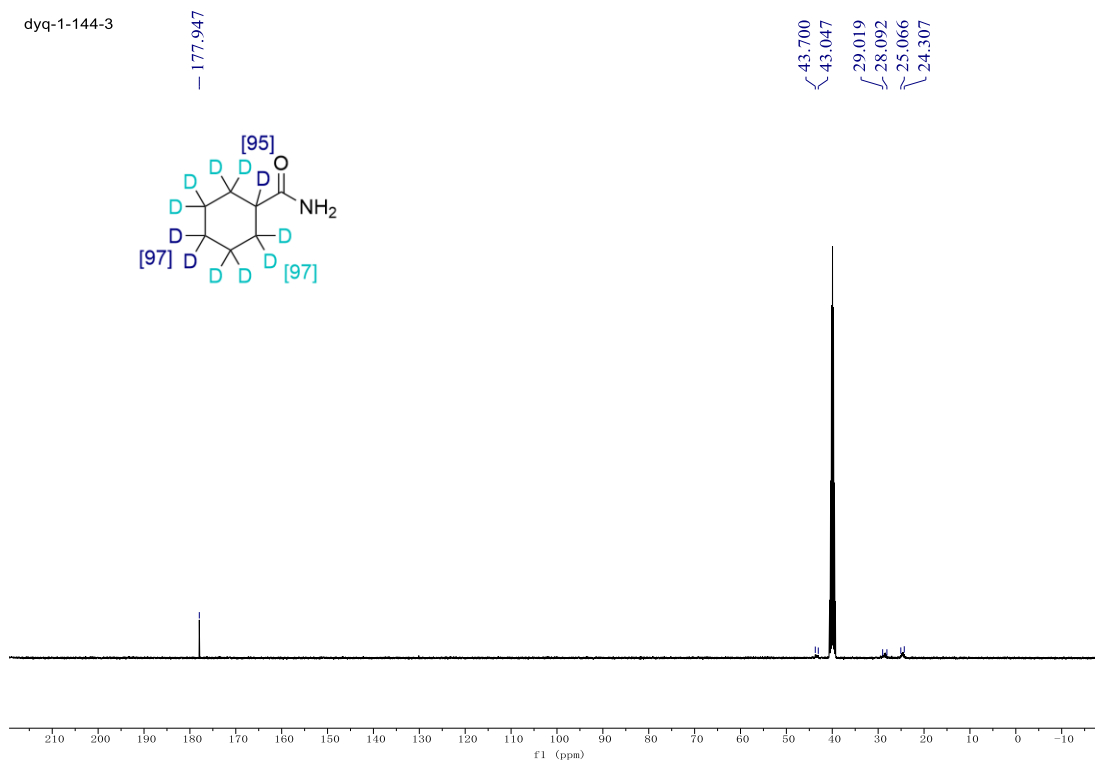

# <sup>19</sup>F NMR for 1f

dyq-1-144-3

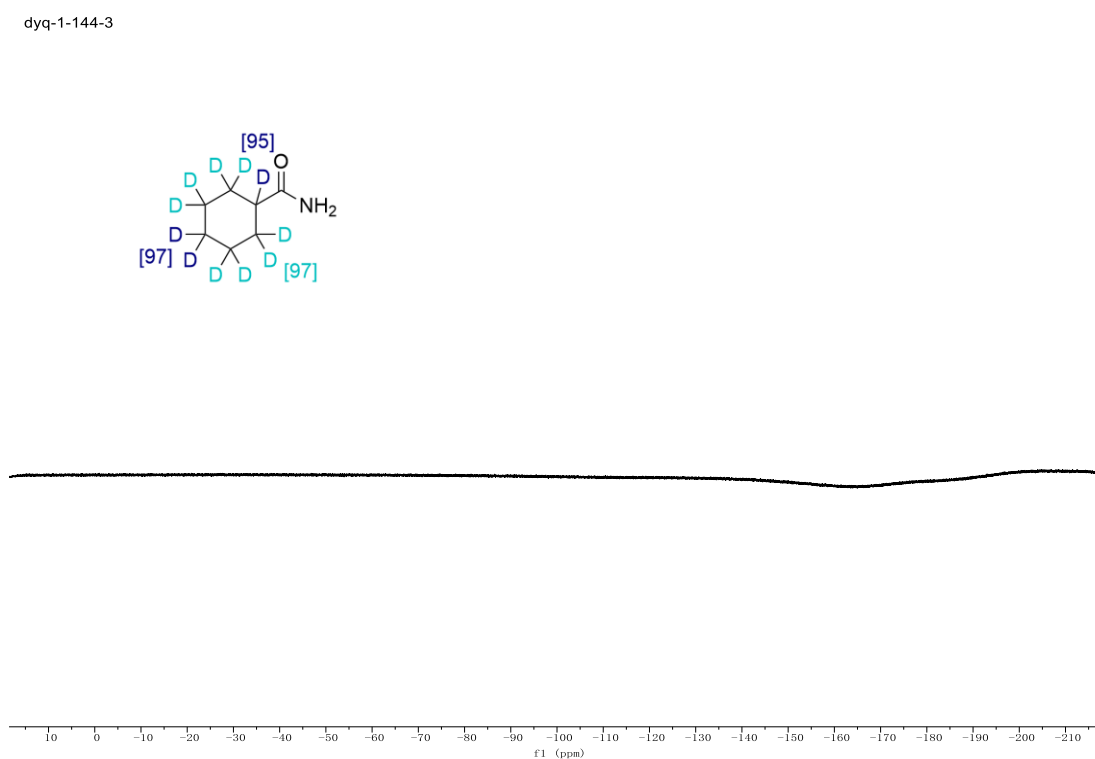

# <sup>1</sup>H NMR for 2f

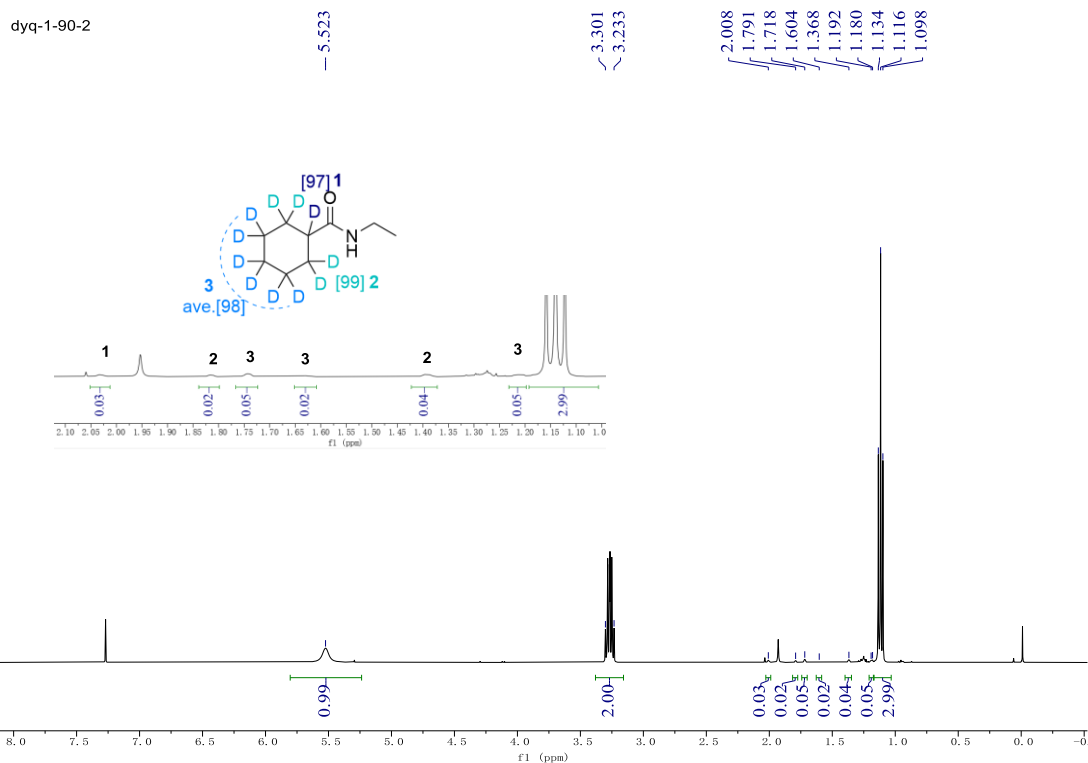

# <sup>13</sup>C NMR for 2f

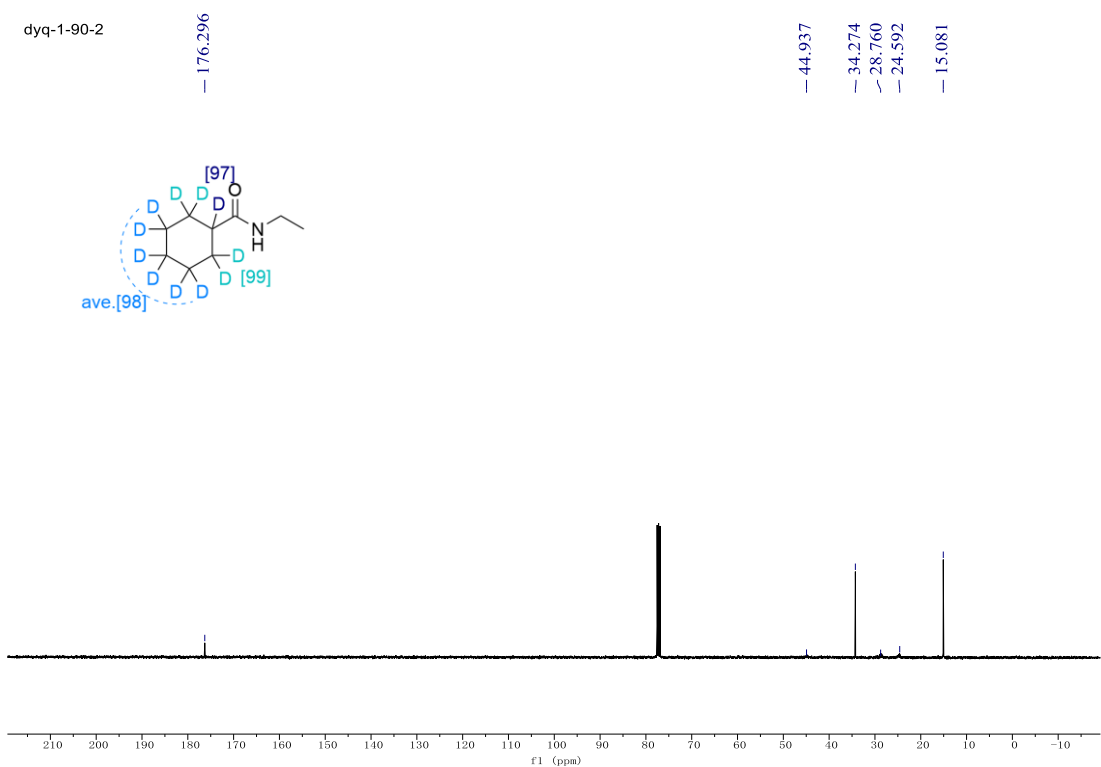

# <sup>19</sup>F NMR for 2f

dyq-1-90-2

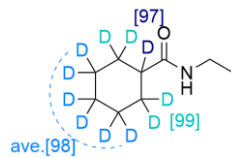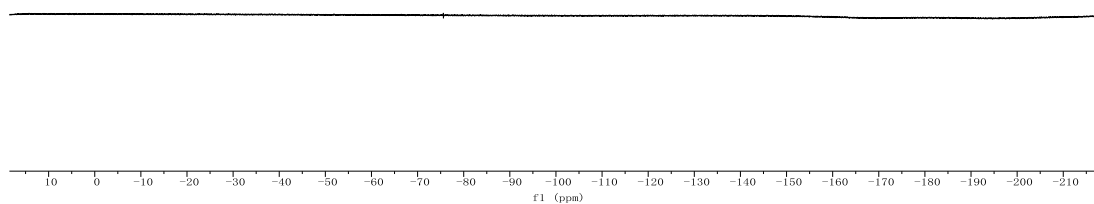

# <sup>1</sup>H NMR for 3f

dyq-1-98-3

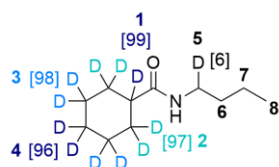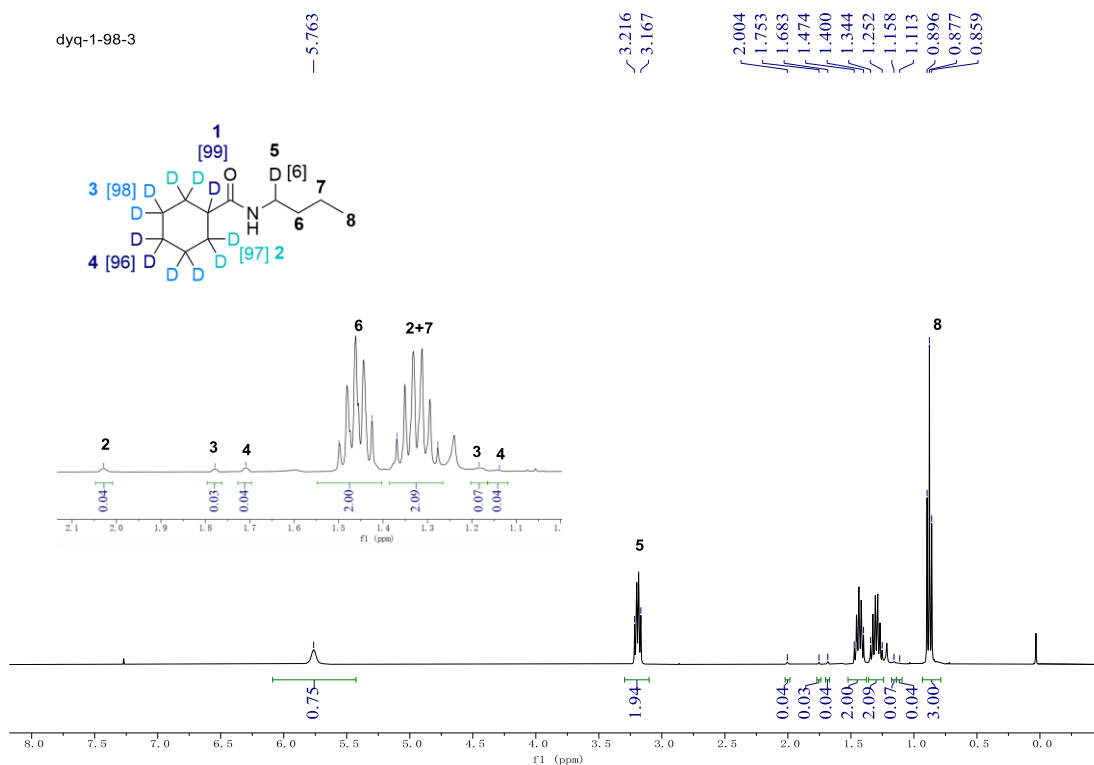



### $^{13}\text{C}$ NMR for 3f

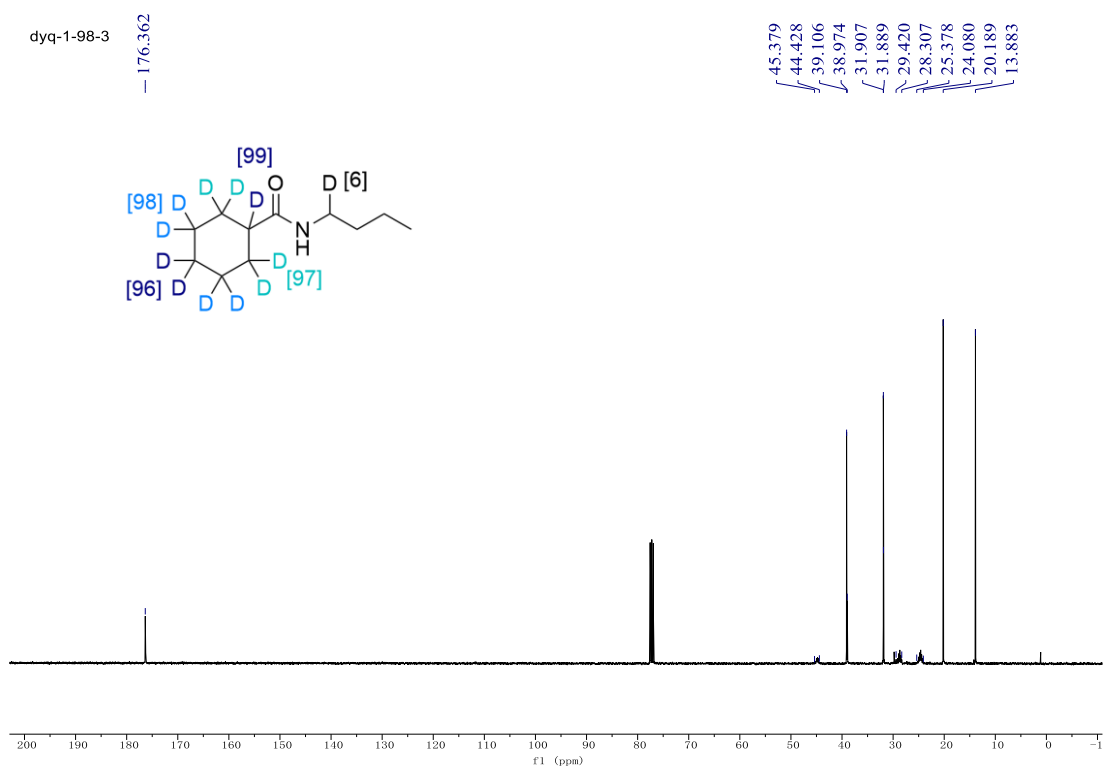

### $^{19}\text{F}$ NMR for 3f

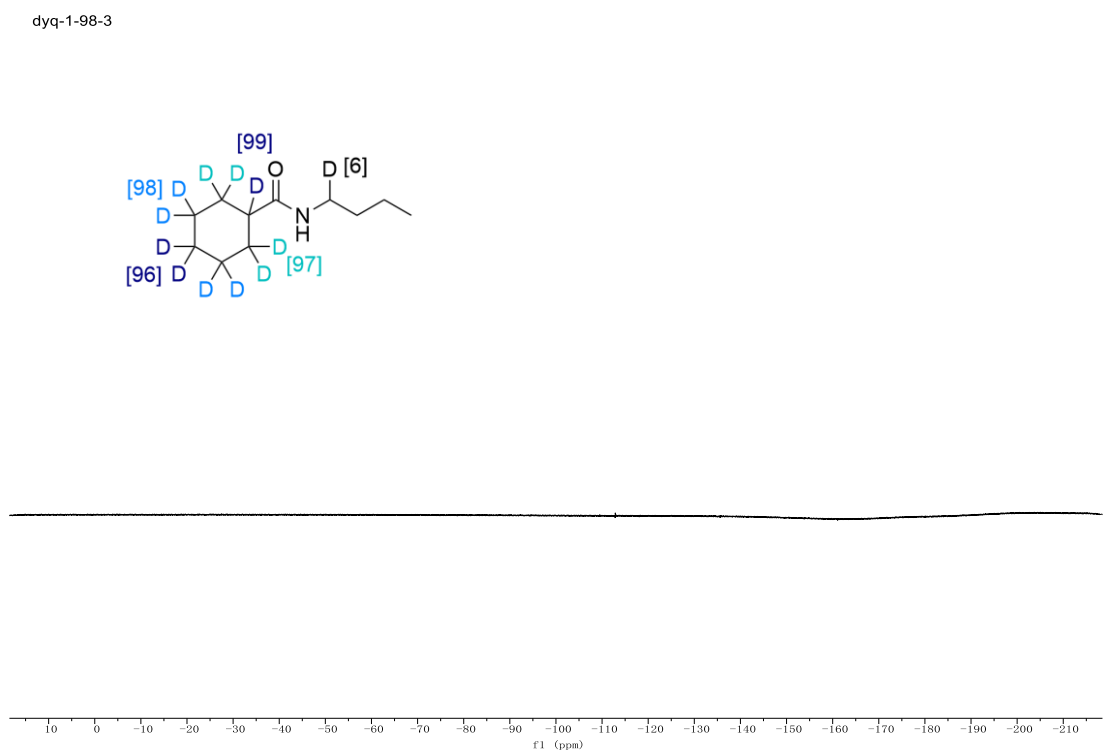

# <sup>1</sup>H NMR for 4f

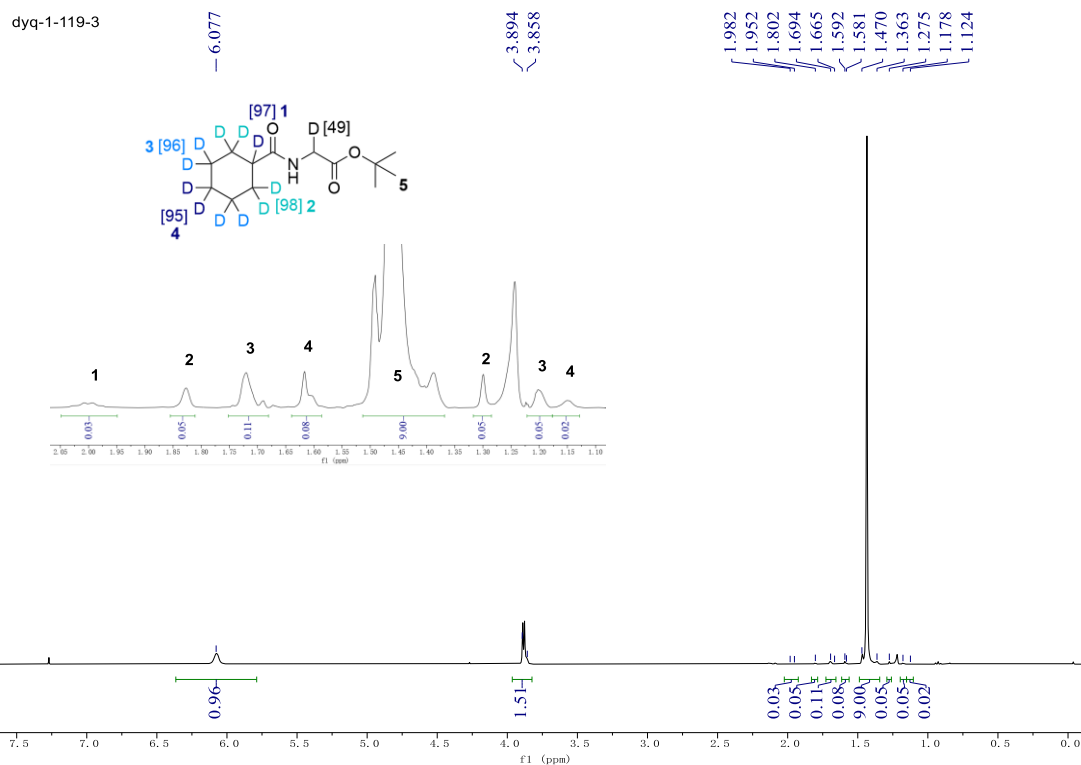

# <sup>13</sup>C NMR for 4f

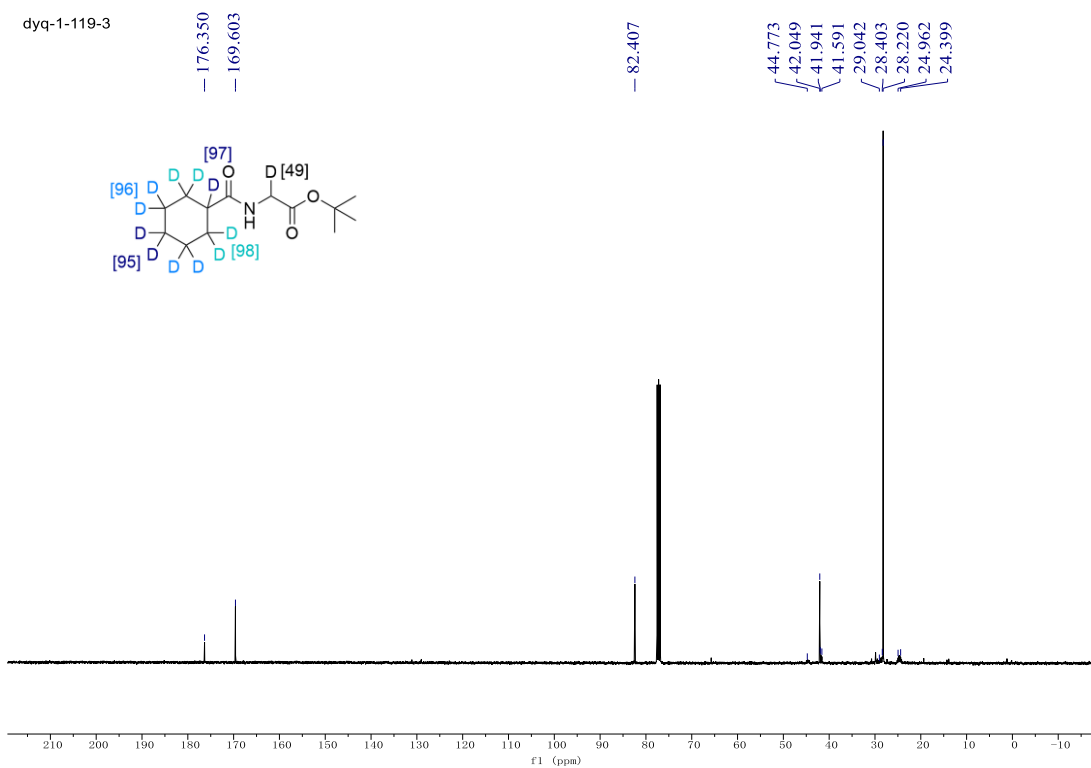

# <sup>1</sup>H NMR for 5f

dyq-1-102-2

— 5.916

2.700  
2.560  
2.225  
1.972  
1.732  
1.679  
1.331  
1.142  
1.112  
0.730  
0.682  
0.461  
0.421

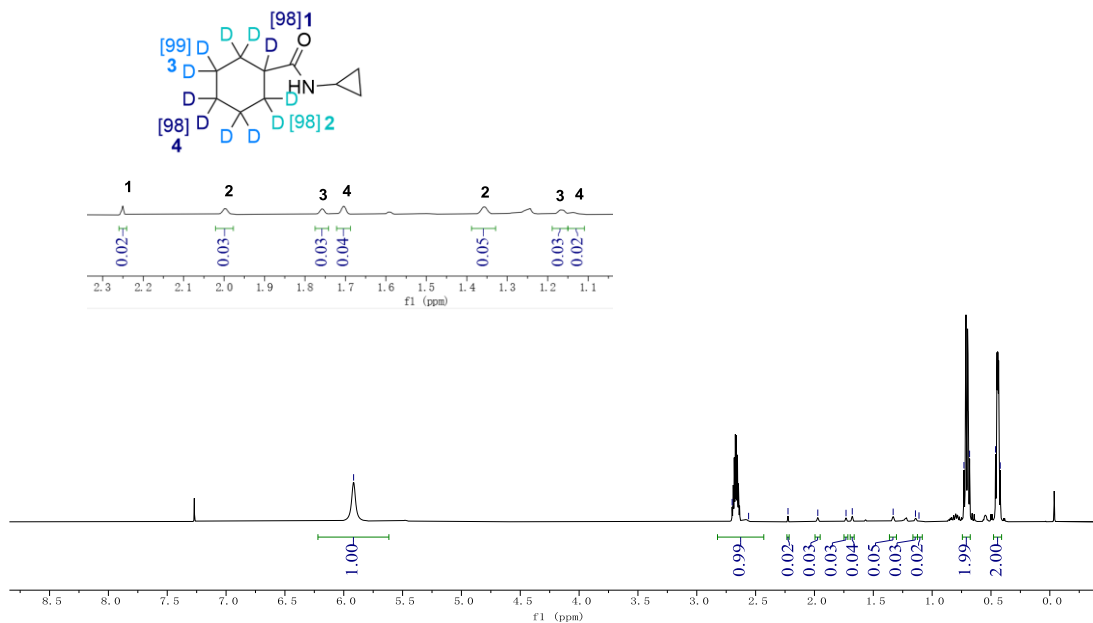

# <sup>13</sup>C NMR for 5f

dyq-1-102-2

— 177.892

44.937  
44.290  
28.956  
28.175  
24.944  
24.183  
22.617  
6.685

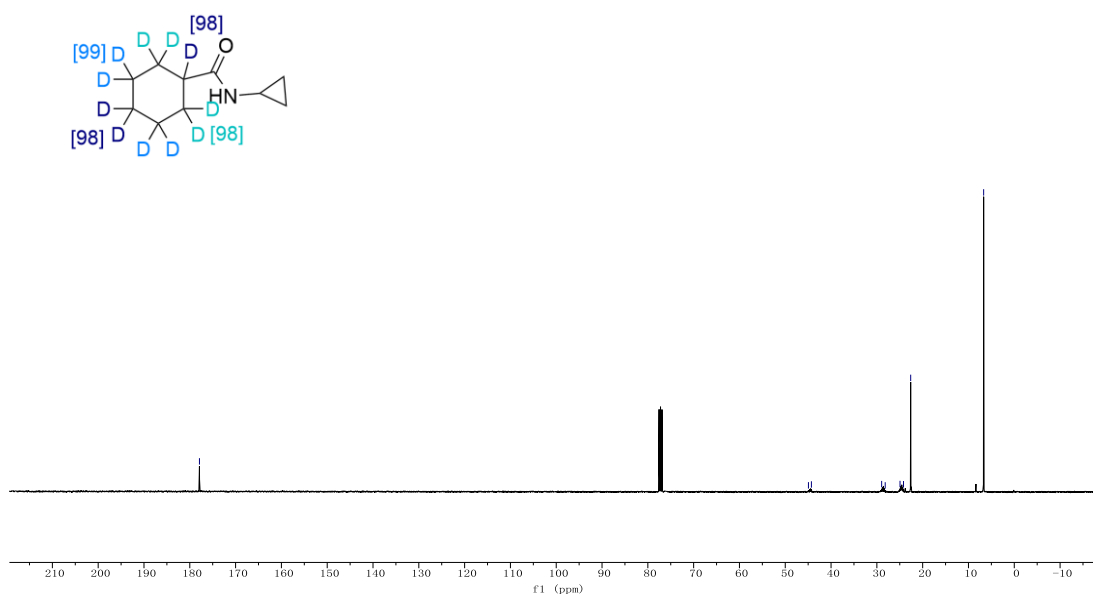

# <sup>19</sup>F NMR for 5f

dyq-1-102-2

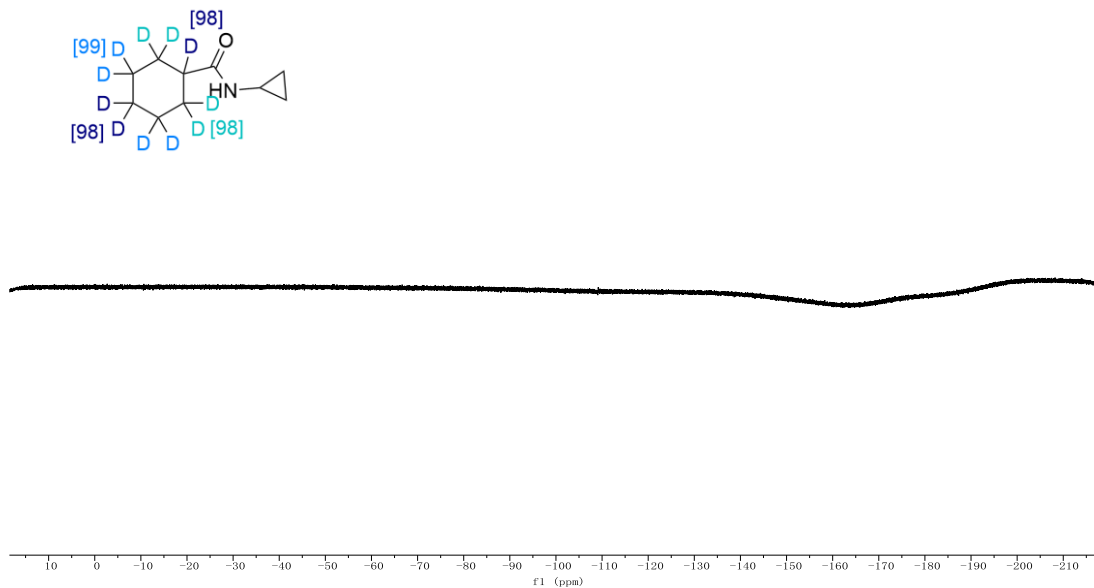

# <sup>1</sup>H NMR for 6f

dyq-1-95-4

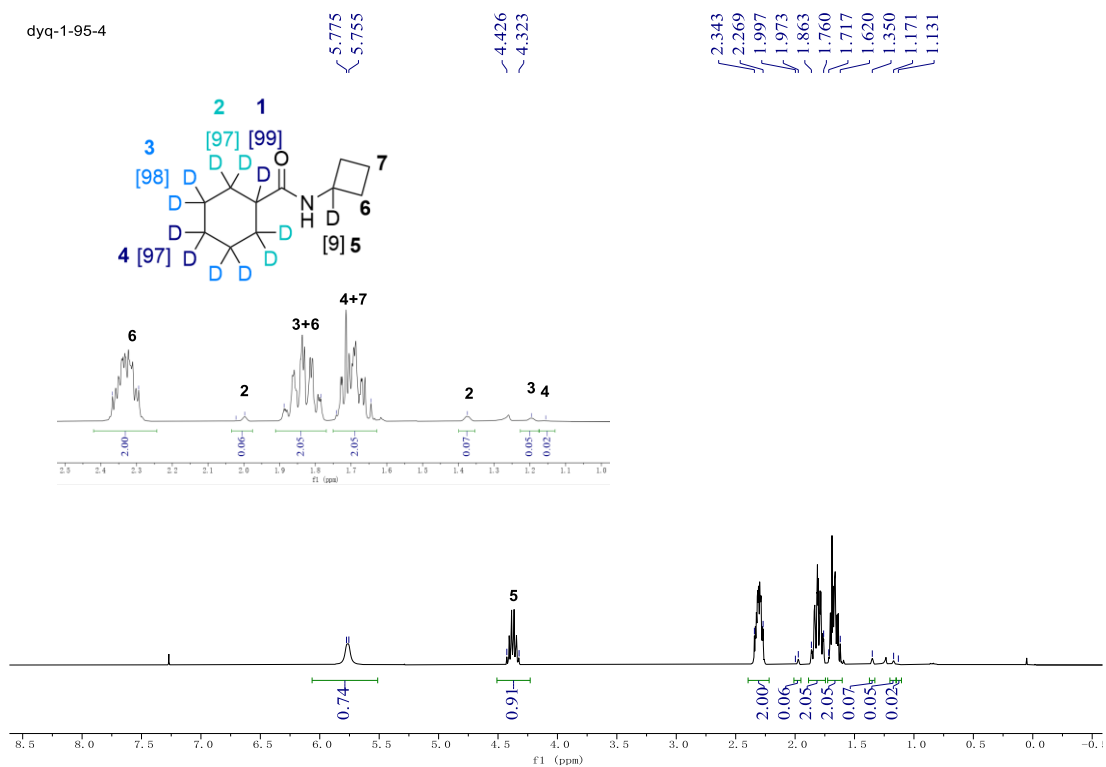

### $^{13}\text{C}$ NMR for 6f

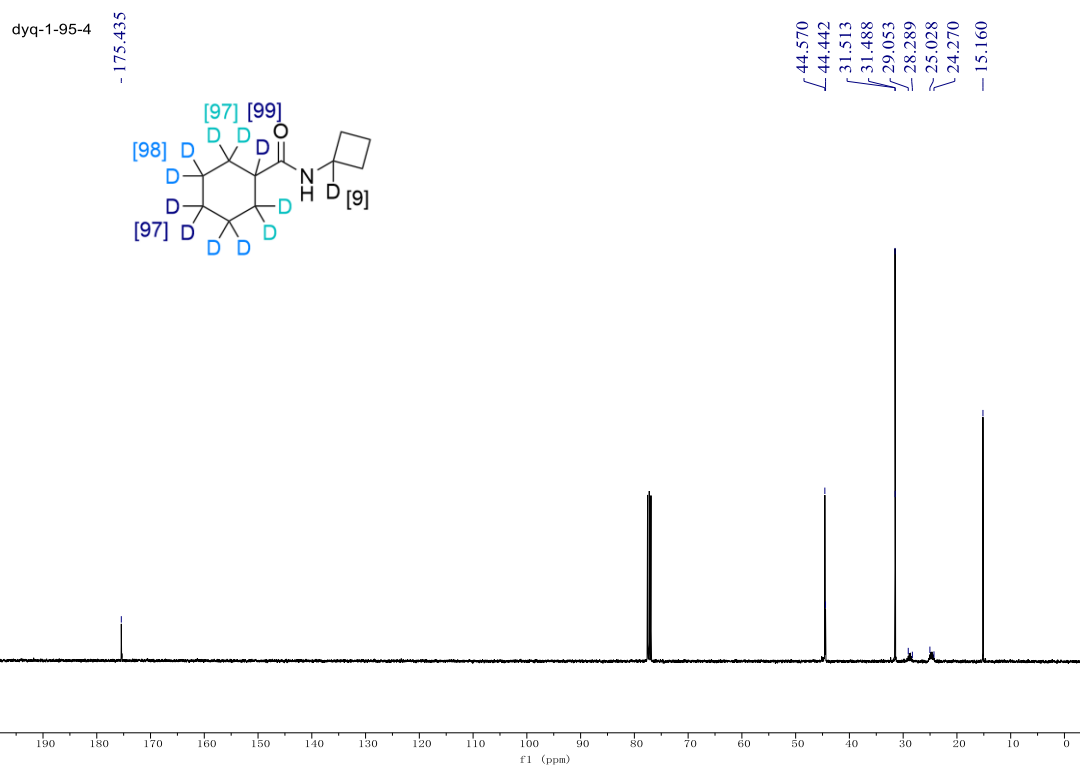

### $^{19}\text{F}$ NMR for 6f

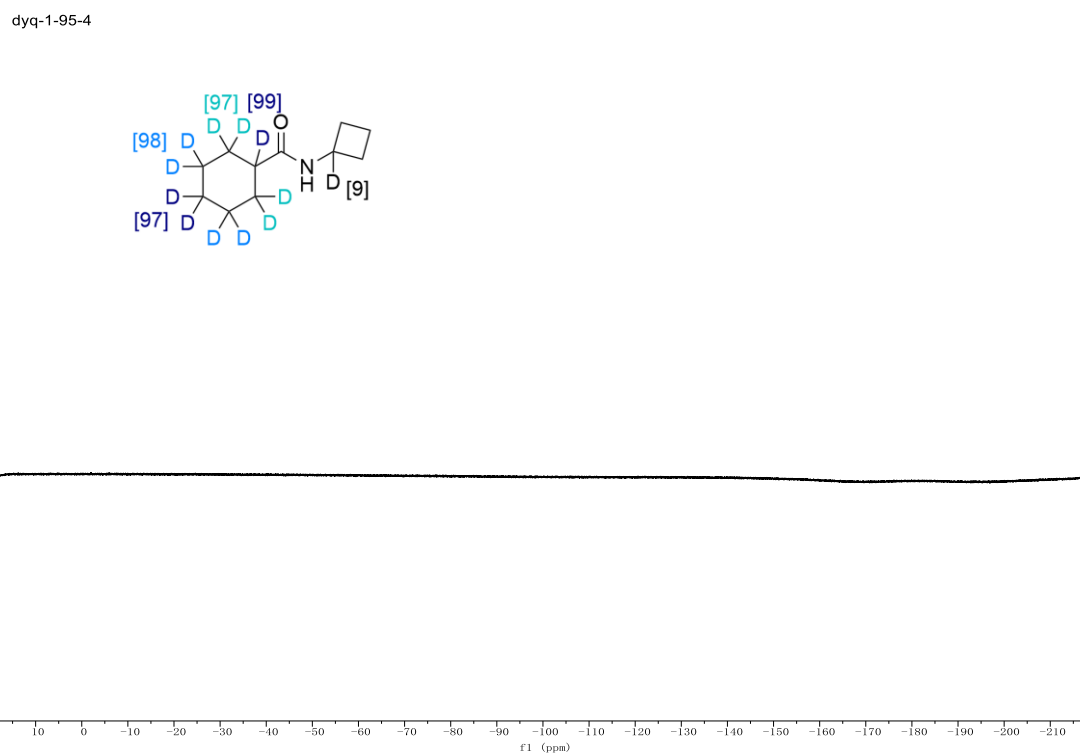

# <sup>1</sup>H NMR for 7f

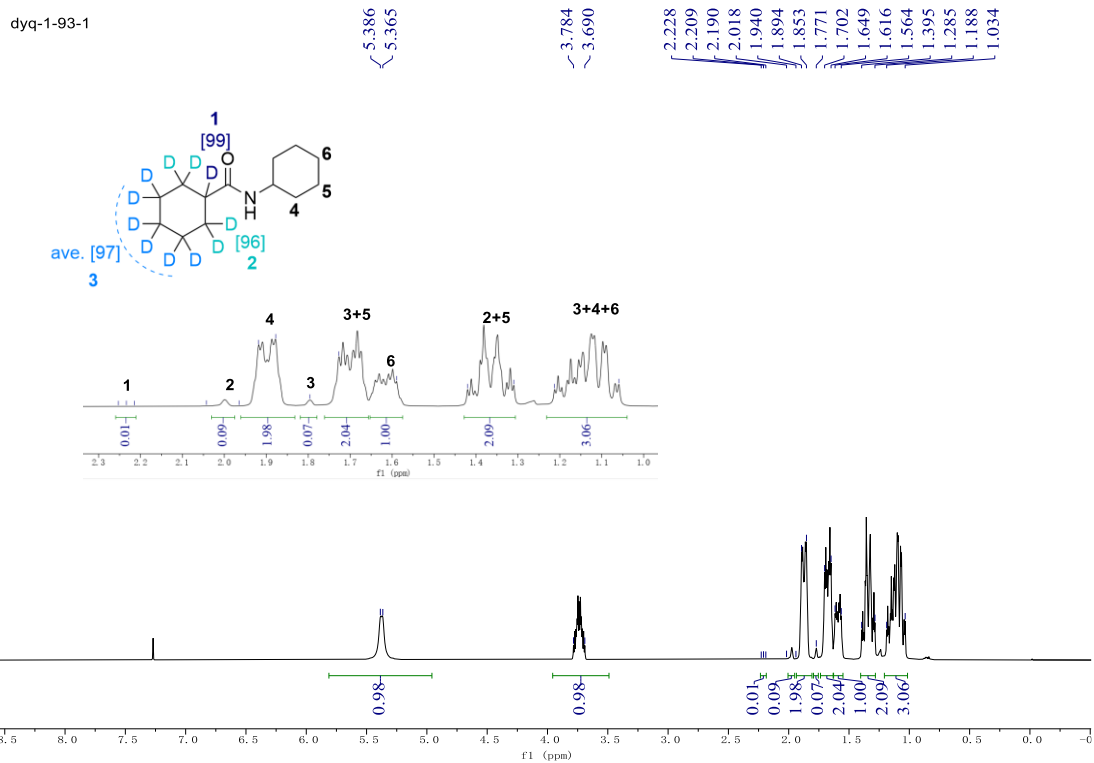

# <sup>13</sup>C NMR for 7f

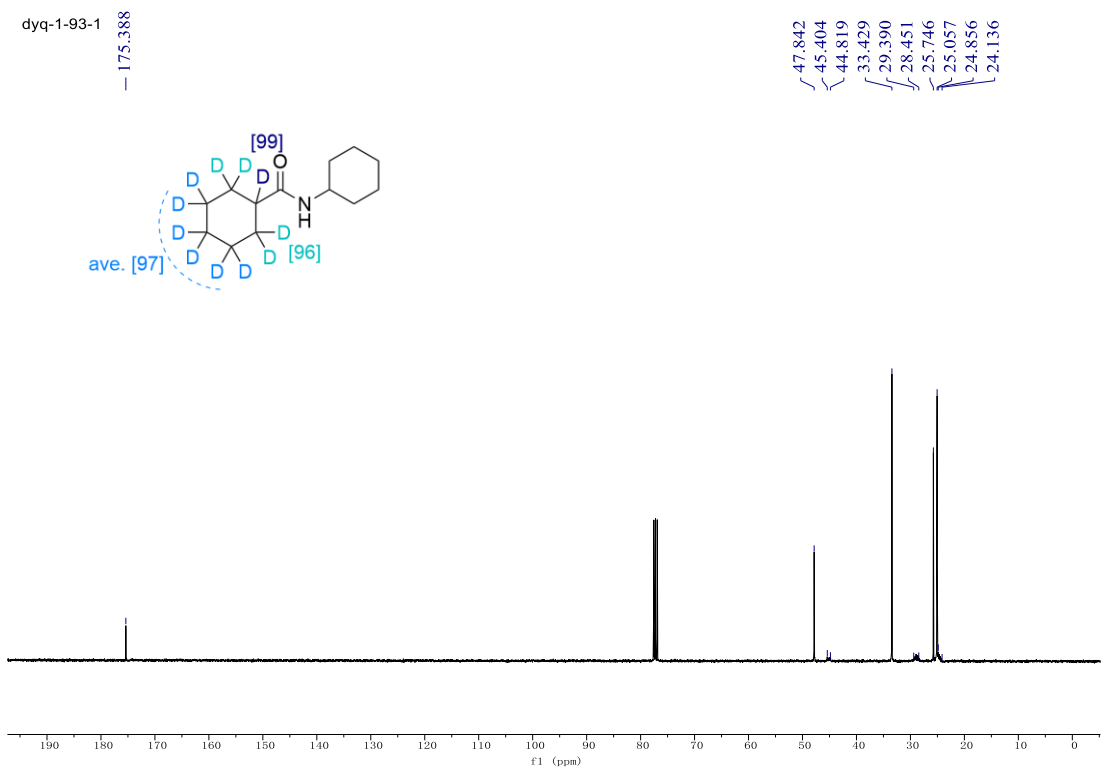

# <sup>19</sup>F NMR for 7f

dyq-1-93-1

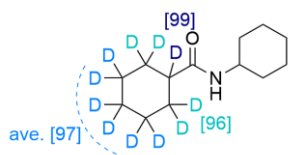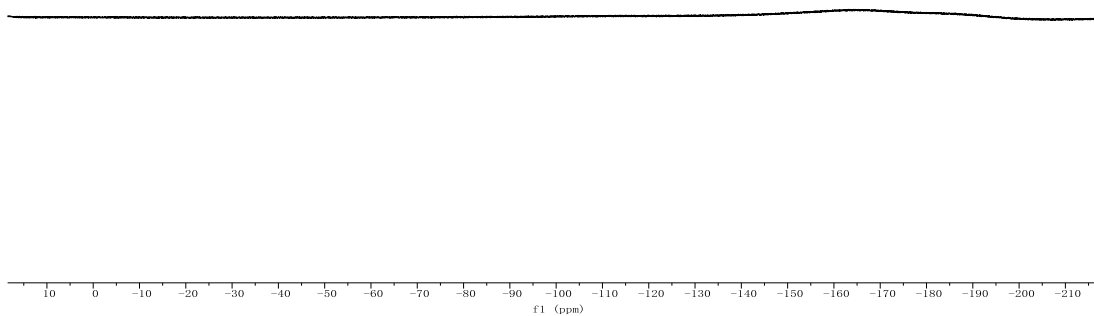

# <sup>1</sup>H NMR for 8f

dyq-1-111-6

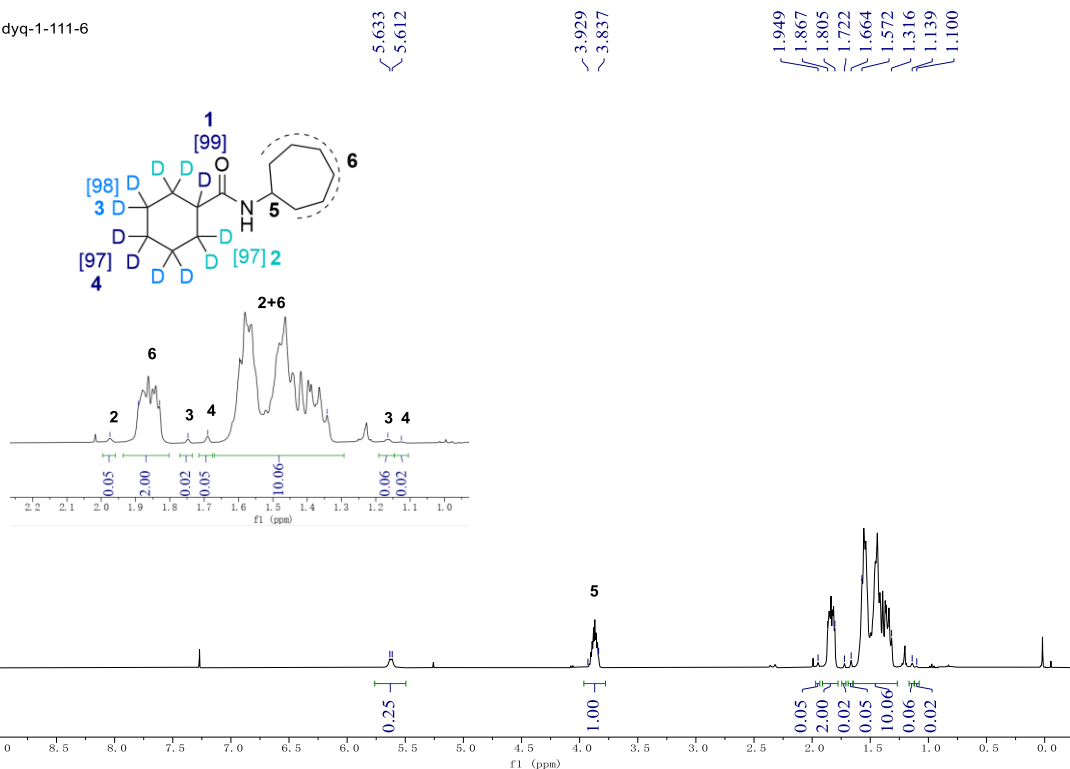

# <sup>13</sup>C NMR for 8f

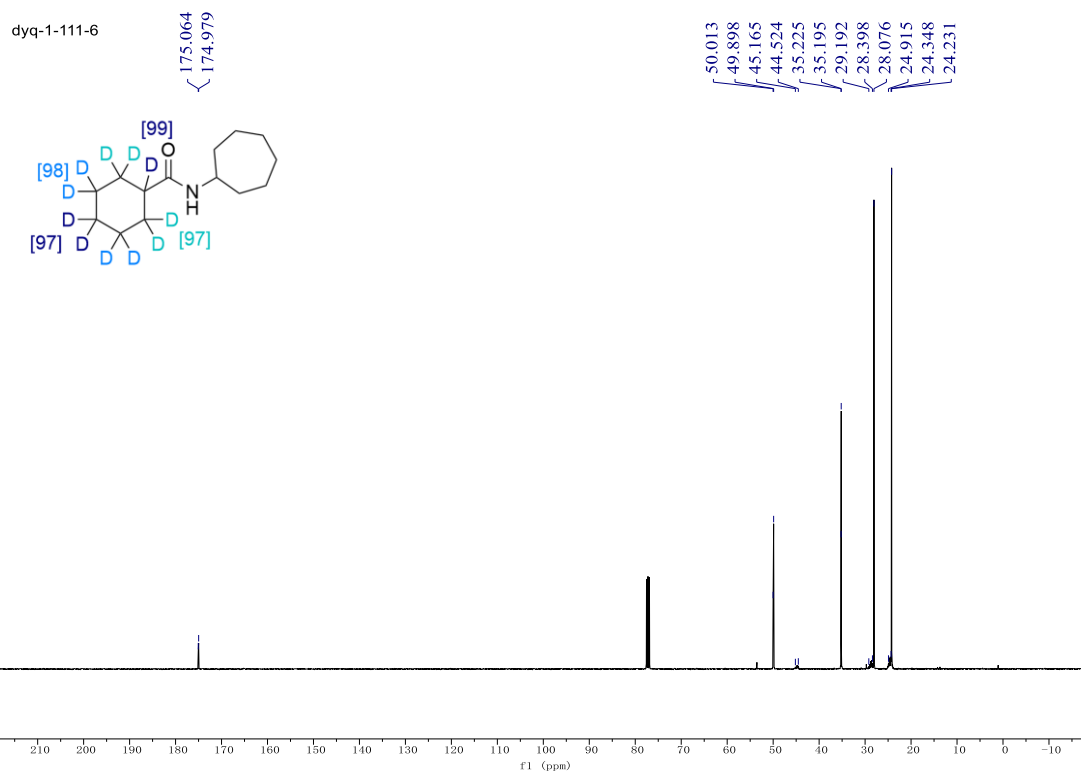

# <sup>19</sup>F NMR for 8f

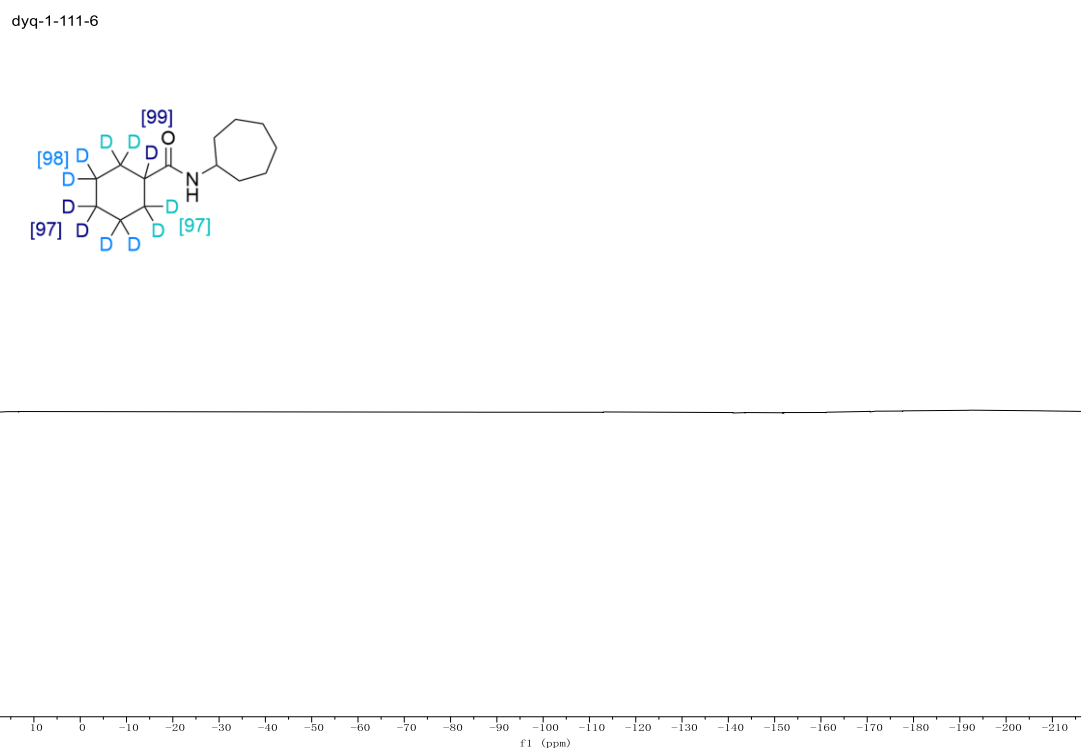



**<sup>1</sup>H NMR for 9f**

dyq-1-141-4b

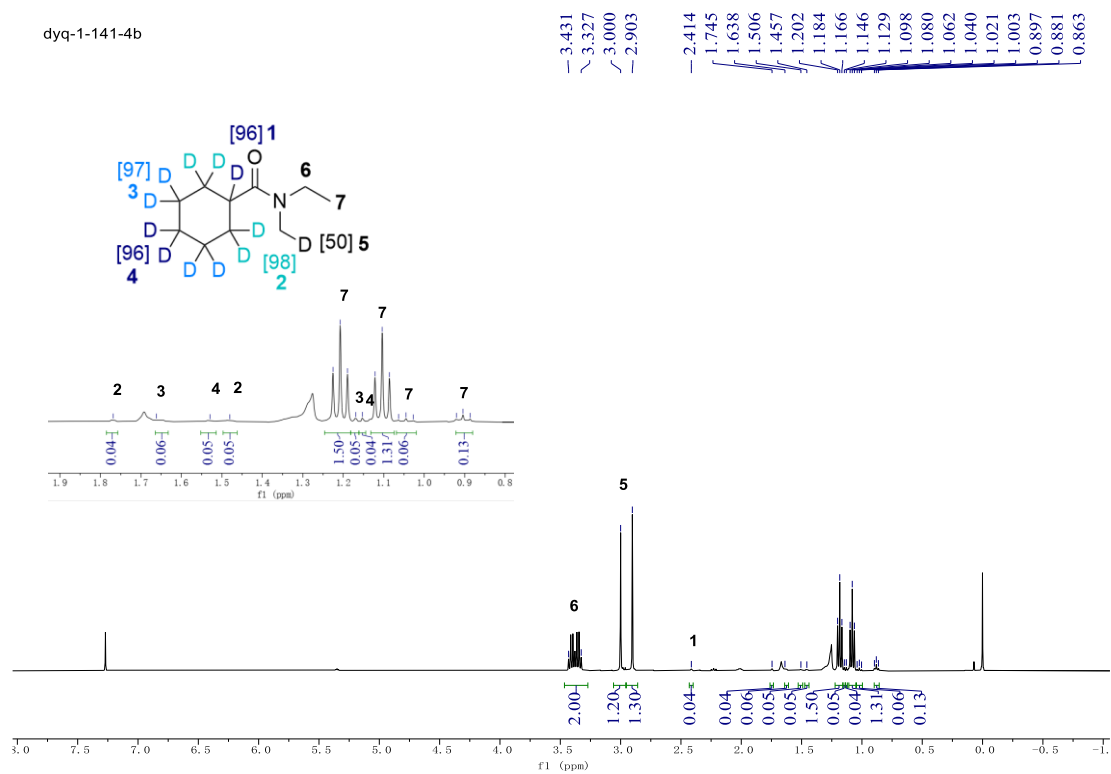

**<sup>13</sup>C NMR for 9f**

dyq-1-141-4b

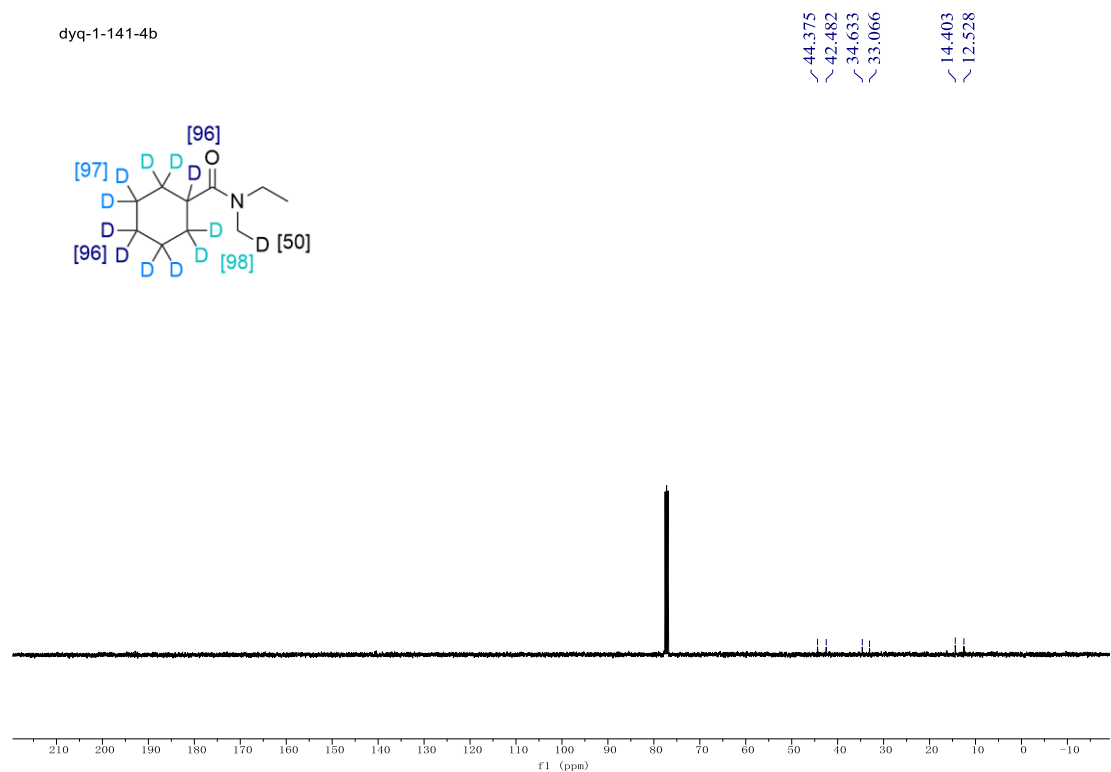

# <sup>1</sup>H NMR for 10f

dyq-1-98-4

3.295  
3.276  
3.257  
3.224  
3.205  
3.185  
2.362  
2.017  
1.728  
1.659  
1.612  
1.560  
1.428  
1.371  
1.228  
1.191  
0.967  
0.949  
0.931  
0.918  
0.900  
0.882

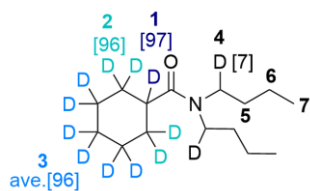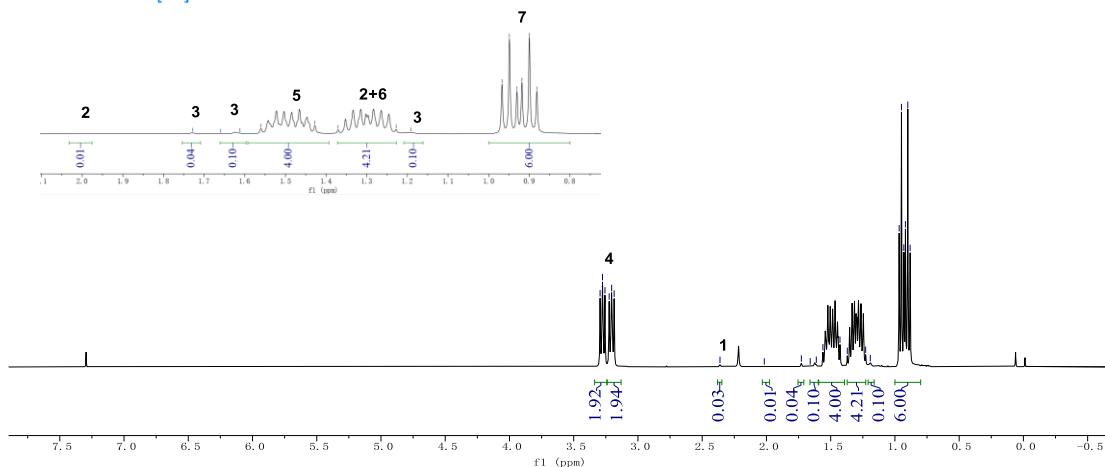

# <sup>13</sup>C NMR for 10f

dyq-1-98-4

175.950

47.341  
45.525  
40.156  
39.783  
31.809  
29.951  
28.848  
27.566  
25.016  
24.197  
20.179  
20.026  
13.871  
13.815

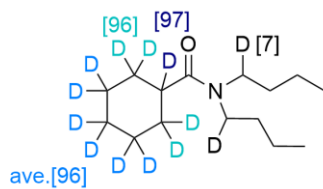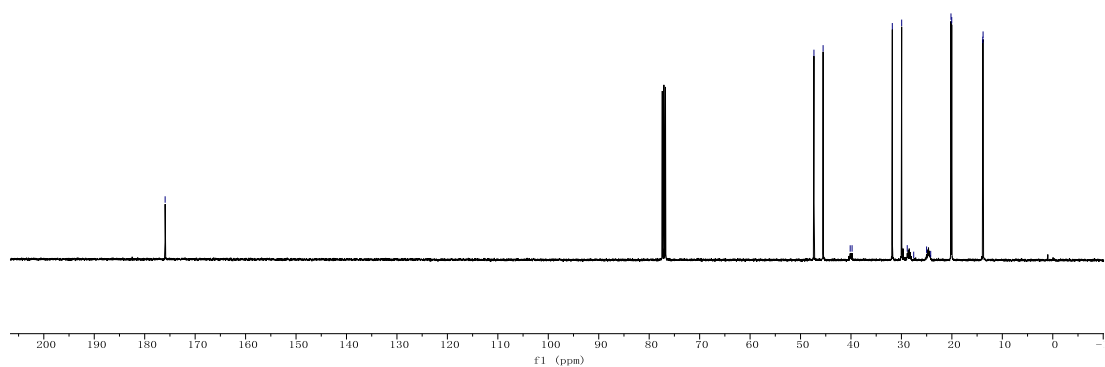

# <sup>1</sup>H NMR for 11f

dyq-1-99-2

— 3.927

— 3.536

2.215

2.176

1.982

1.695

1.598

1.447

1.305

1.167

1.034

1.008

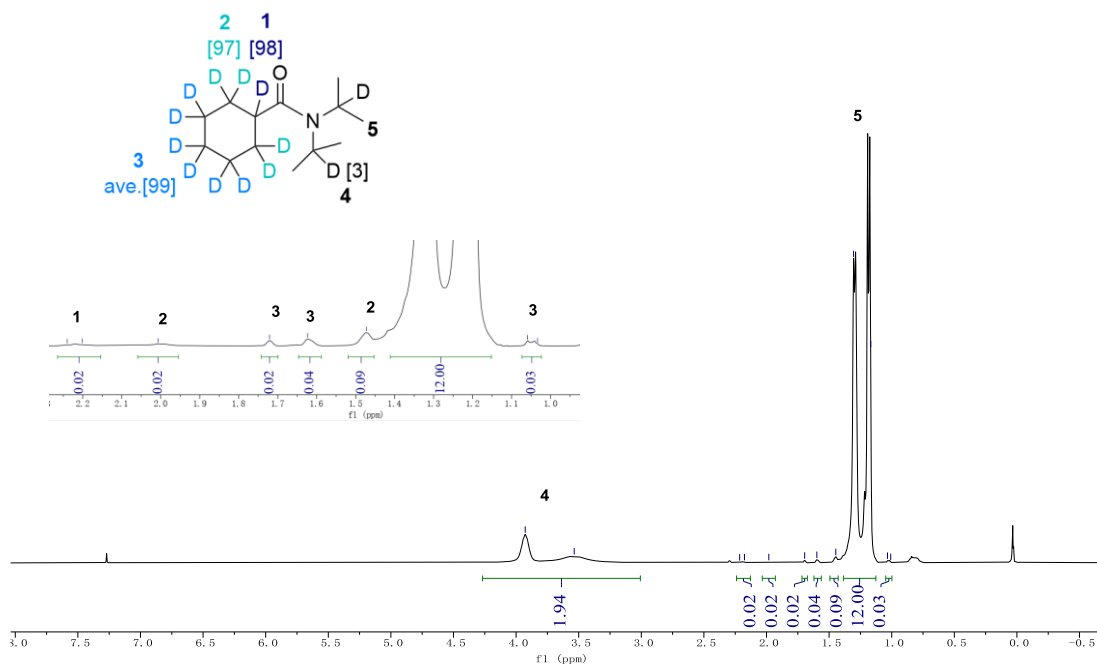

# <sup>13</sup>C NMR for 11f

dyq-1-99-2

— 175.578

47.491

45.495

42.091

41.531

29.822

28.994

28.227

24.881

21.633

20.878

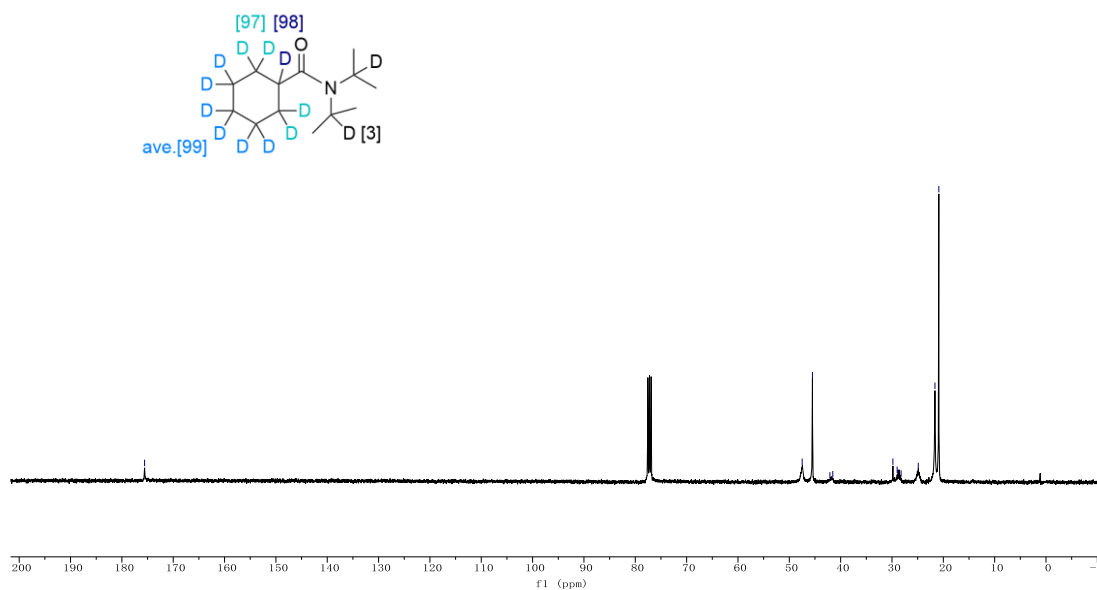

# <sup>1</sup>H NMR for 12f

dyq-1-110-2

3.633  
3.616  
3.599  
3.442  
3.424  
3.406  
3.388  
3.296  
3.279  
3.263  
1.955  
1.767  
1.703  
1.651  
1.582  
1.438  
1.161

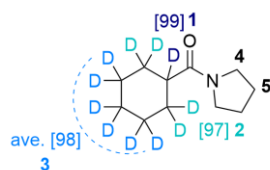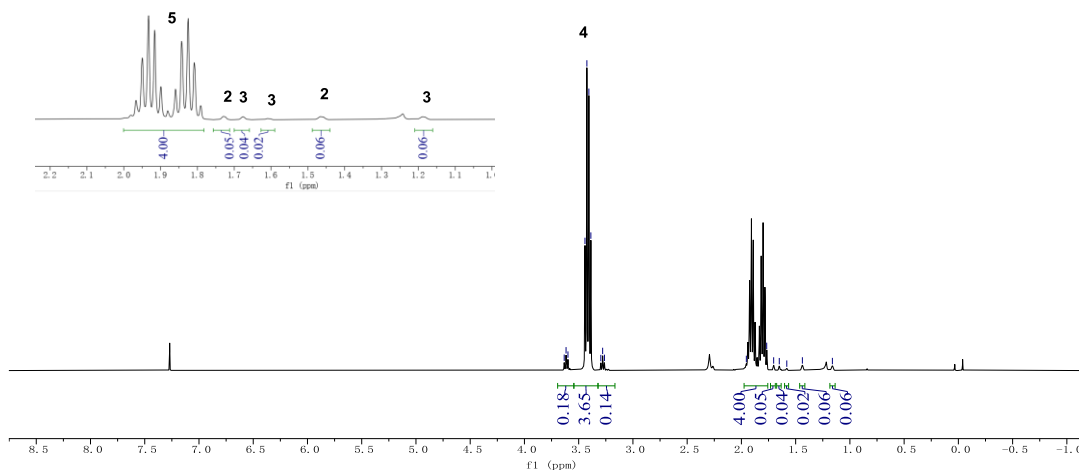

# <sup>13</sup>C NMR for 12f

dyq-1-110-2

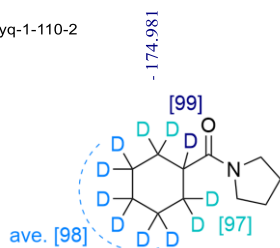

46.347  
45.706  
42.575  
41.923  
28.394  
27.435  
26.263  
25.061  
24.489  
24.377

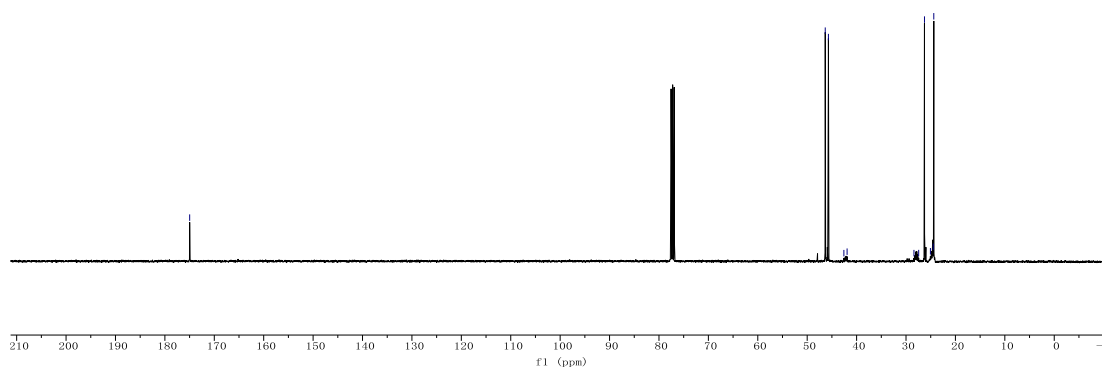

# <sup>1</sup>H NMR for 13f

dyq-1-117-2

4.463  
4.430  
3.655  
3.622  
3.553  
3.450  
2.788  
2.762  
2.756  
2.729  
2.286  
2.259  
2.253  
2.226  
1.923  
1.731  
1.624  
1.488  
1.245  
1.162

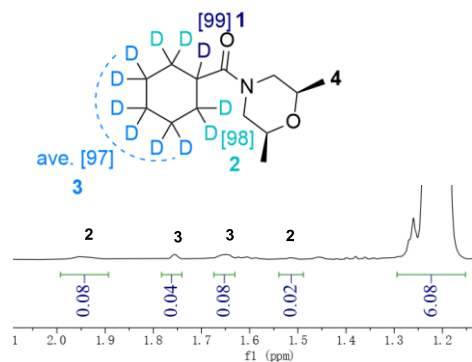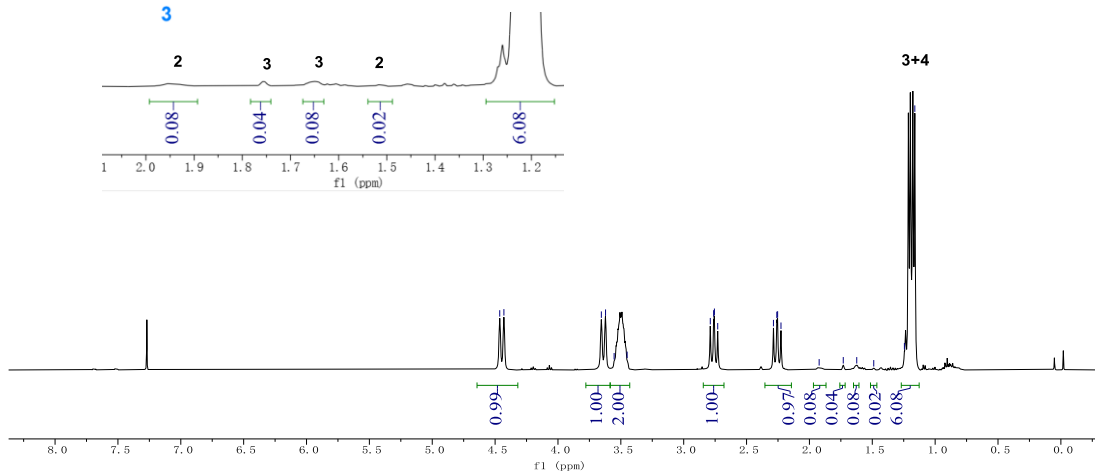

# <sup>13</sup>C NMR for 13f

dyq-1-117-2

174.677  
72.167  
72.103  
51.236  
47.127  
39.861  
39.395  
29.337  
27.670  
25.263  
24.214  
18.917

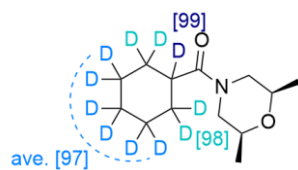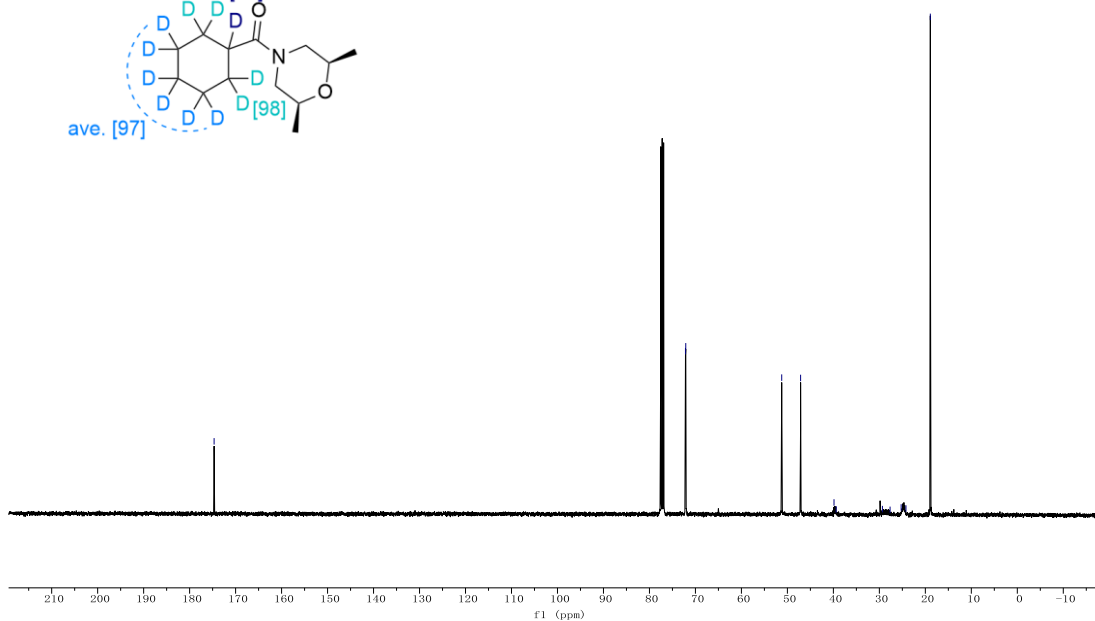

# <sup>19</sup>F NMR for 13f

dyq-1-117-2

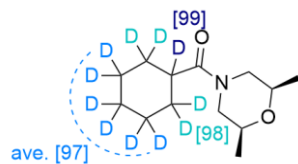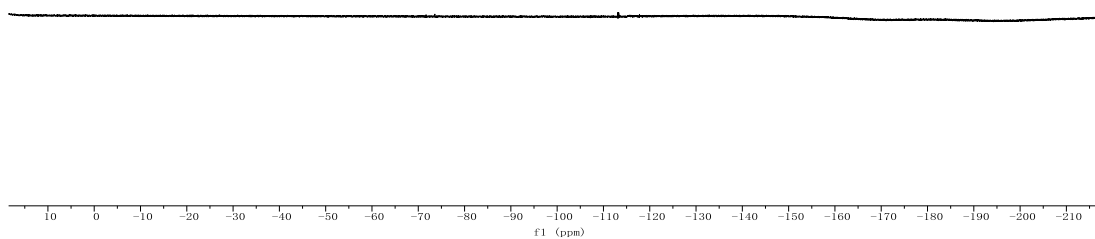

# <sup>1</sup>H NMR for 14f

dyq-1-102-1

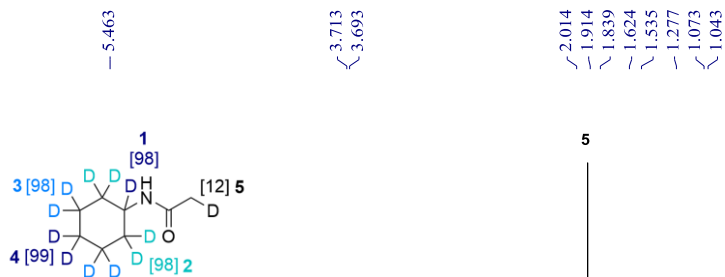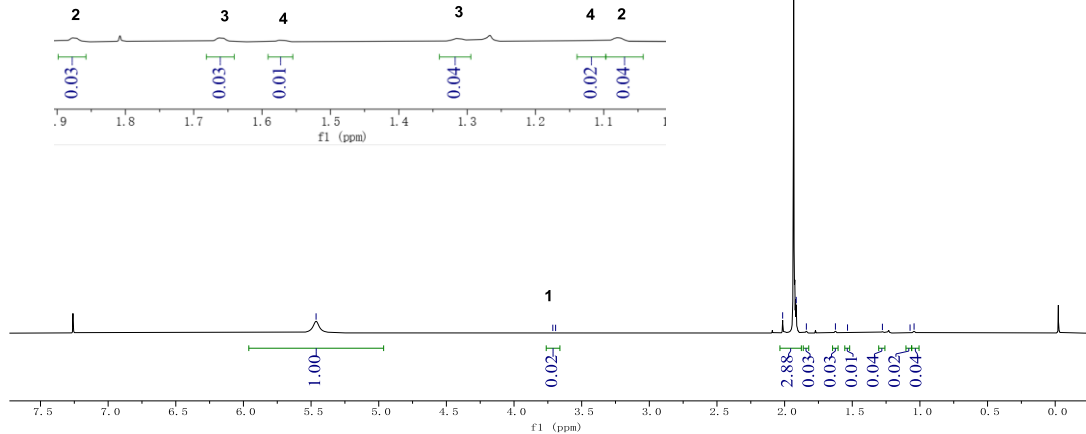

# <sup>13</sup>C NMR for 14f

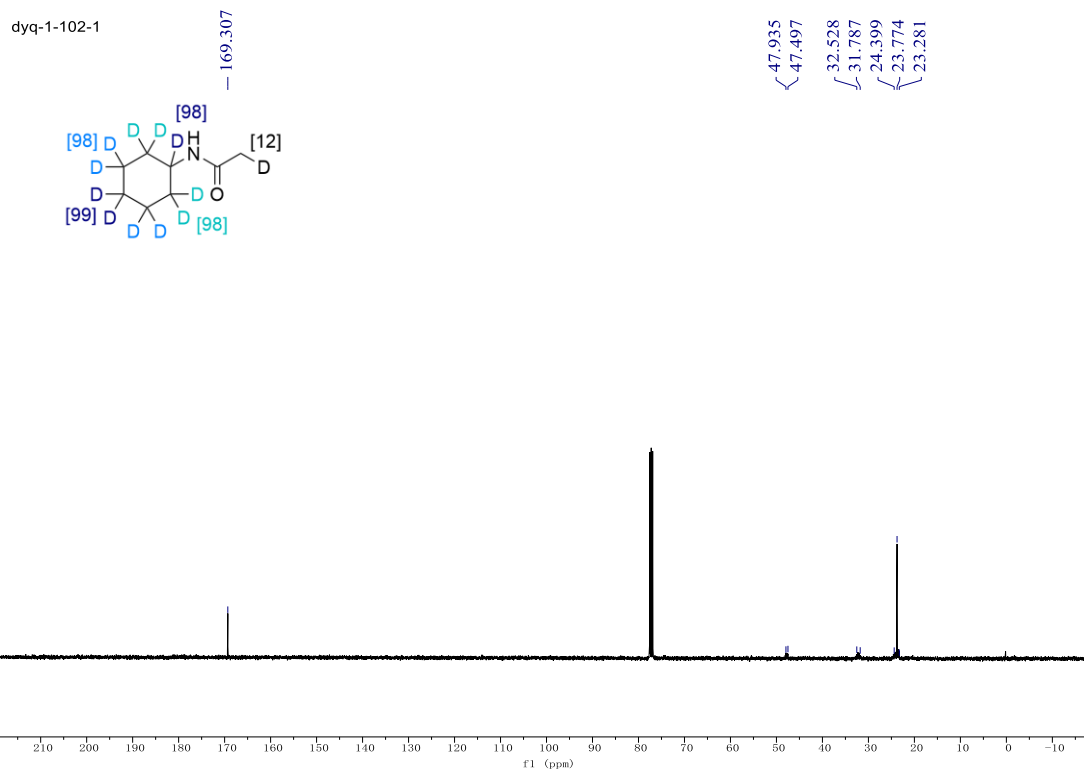

# <sup>1</sup>H NMR for 15f

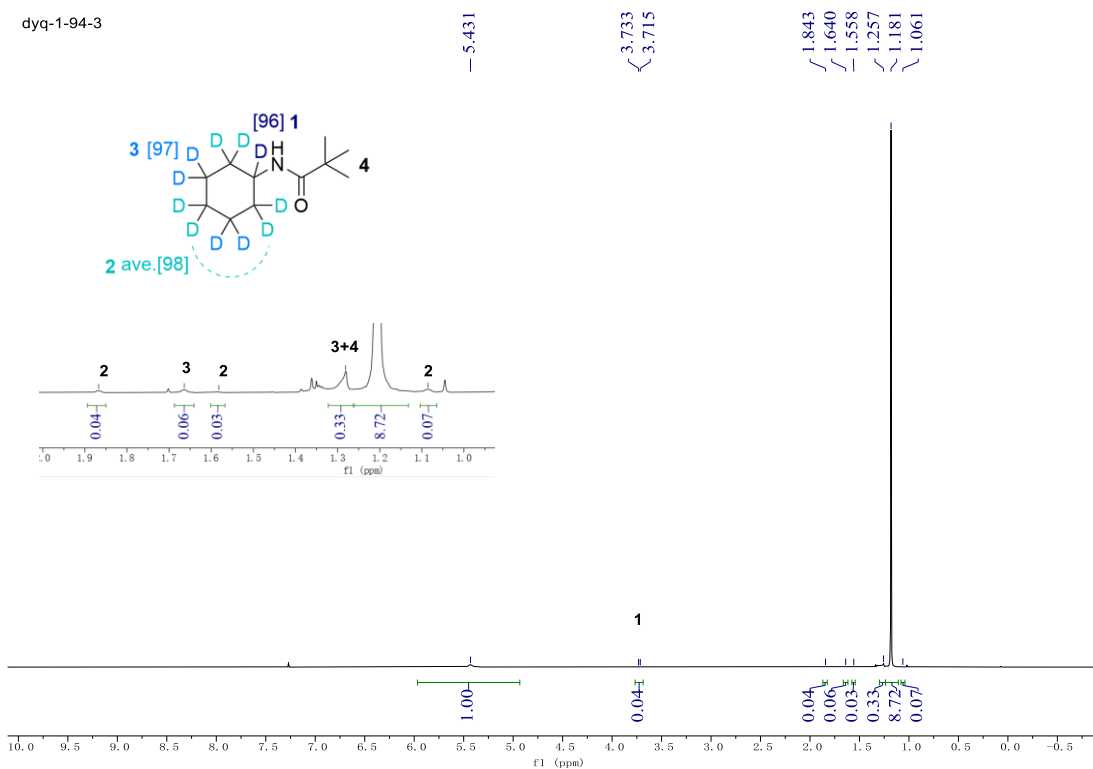

# <sup>13</sup>C NMR for 15f

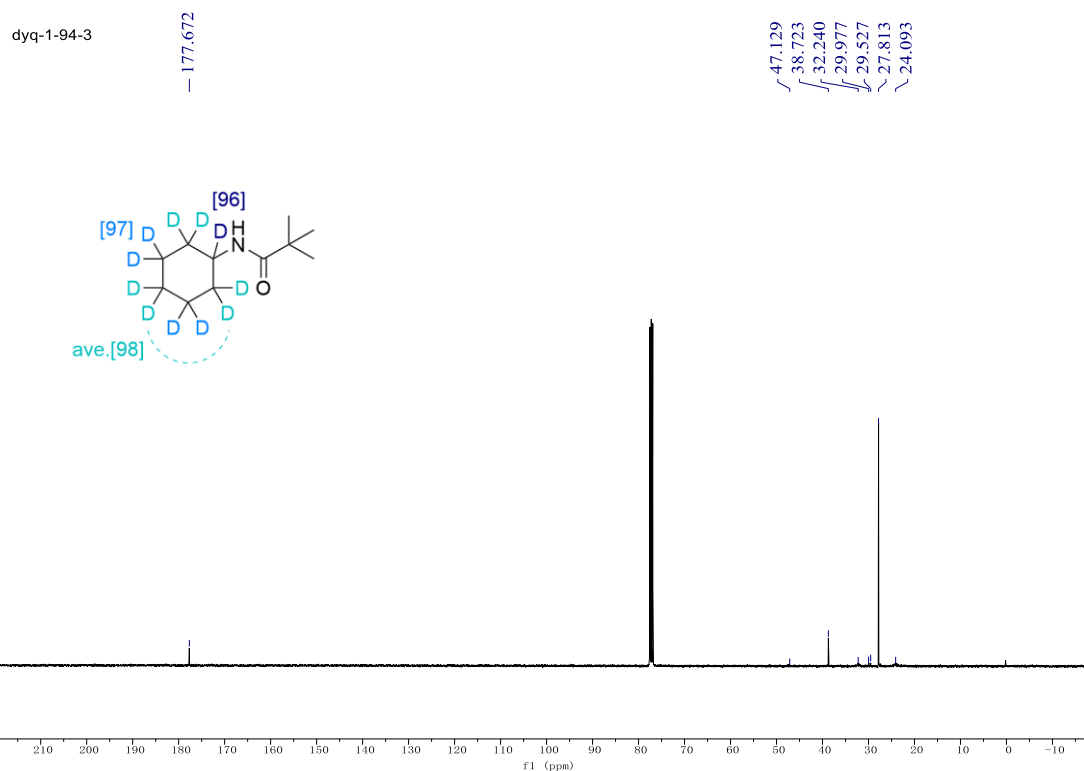

# <sup>19</sup>F NMR for 15f

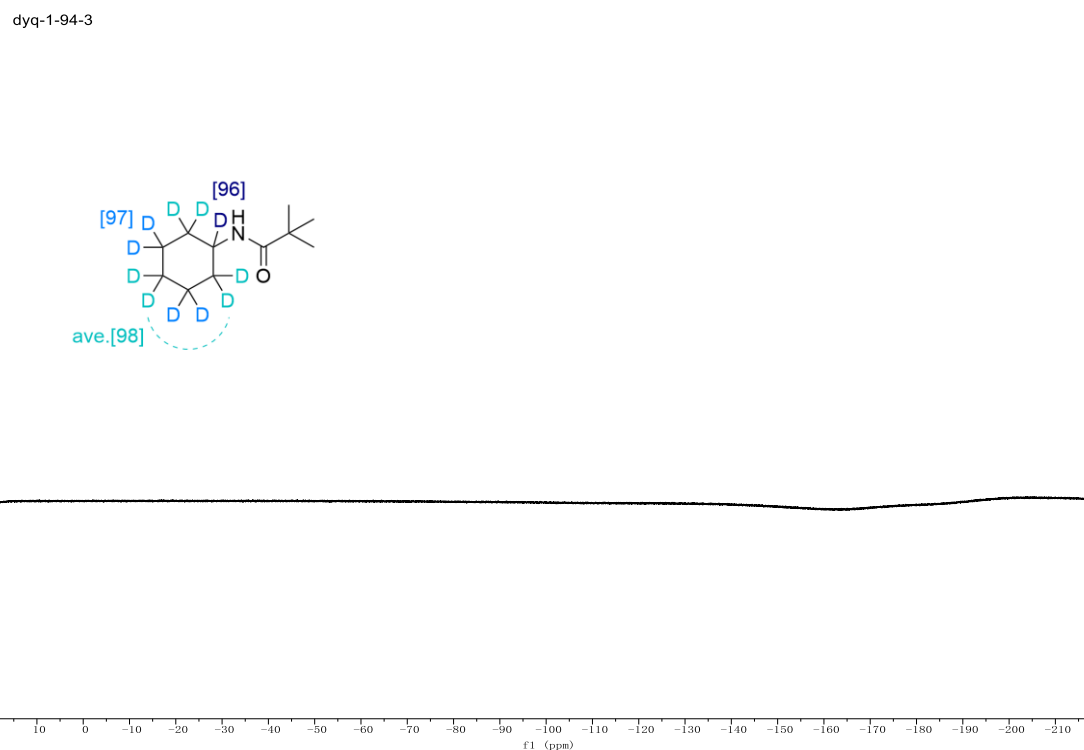



# <sup>1</sup>H NMR for 16f

bfX-8-124-3

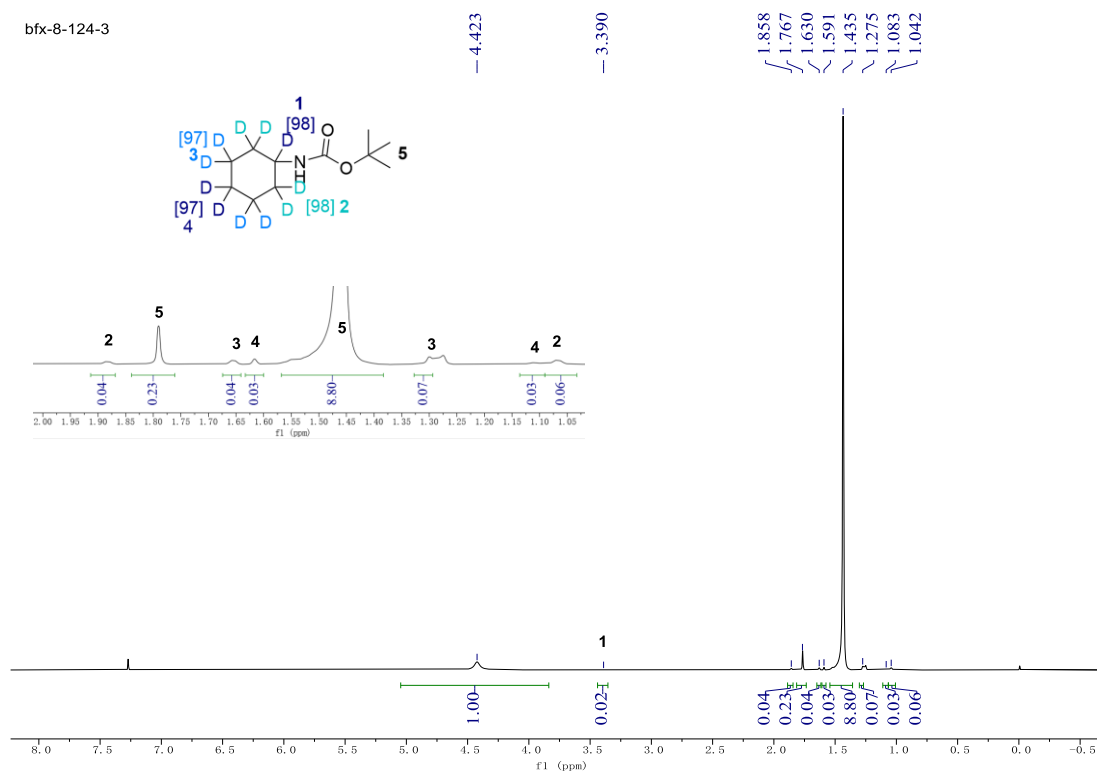

# <sup>13</sup>C NMR for 16f

bfX-8-124-3

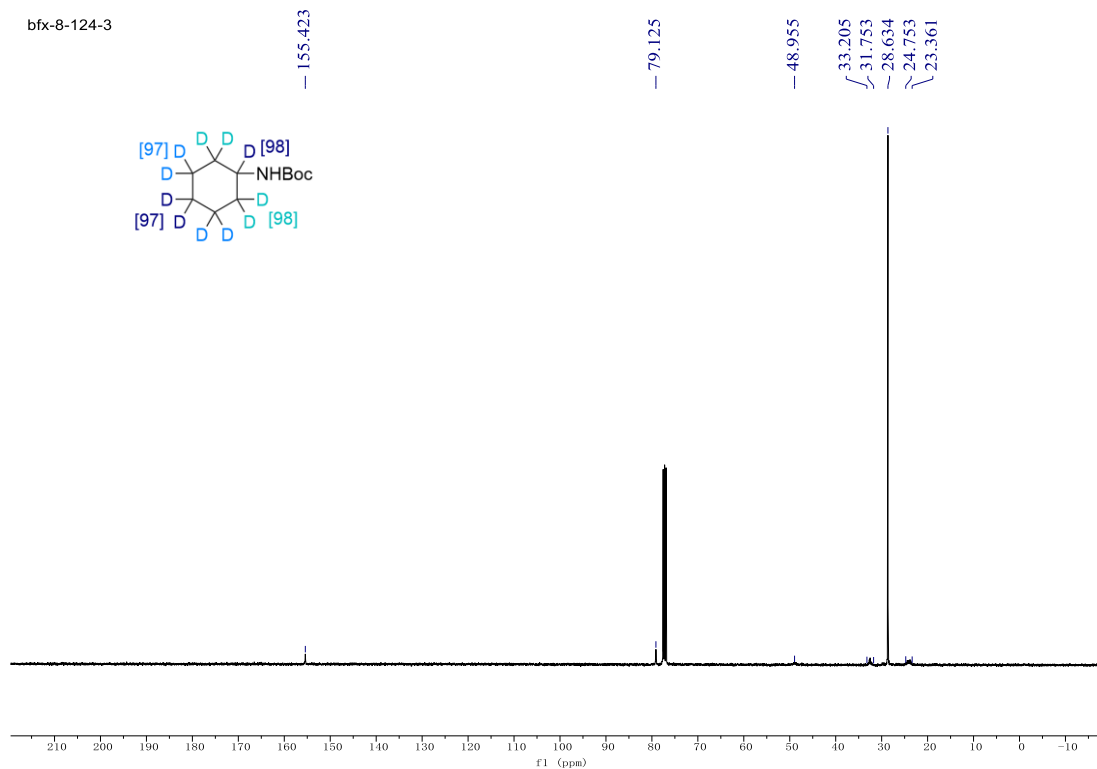

# <sup>1</sup>H NMR for 17f

dyq-1-102-4

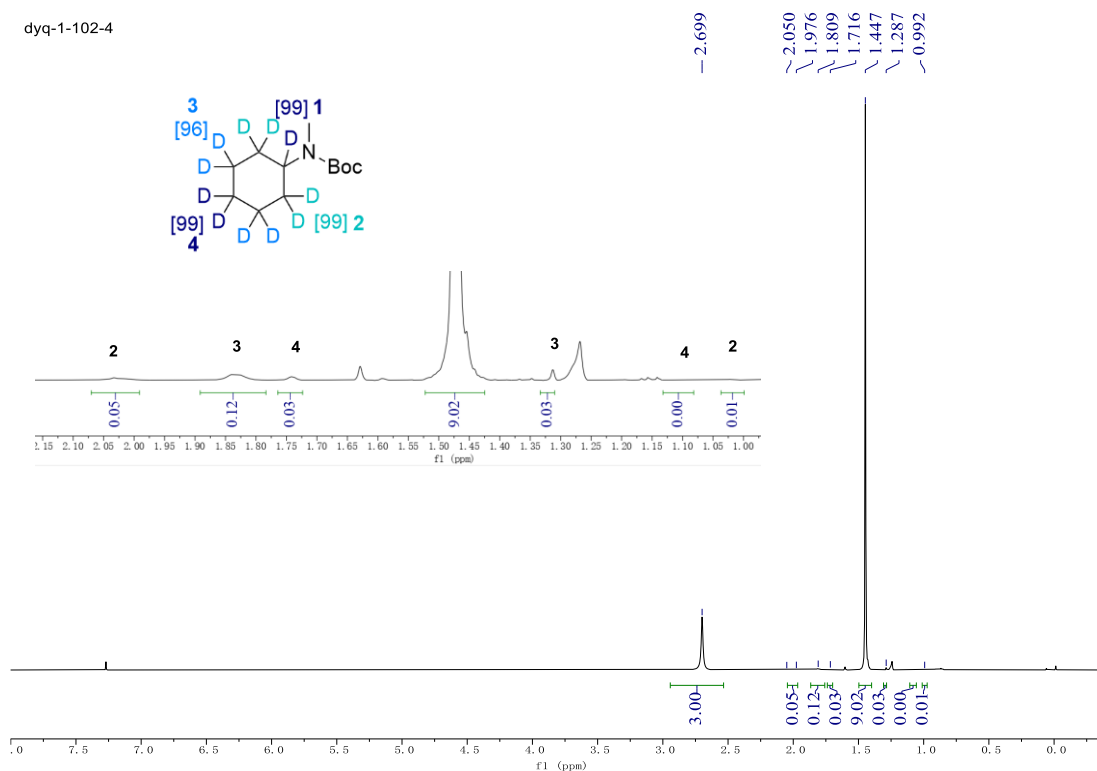

# <sup>13</sup>C NMR for 17f

dyq-1-102-4

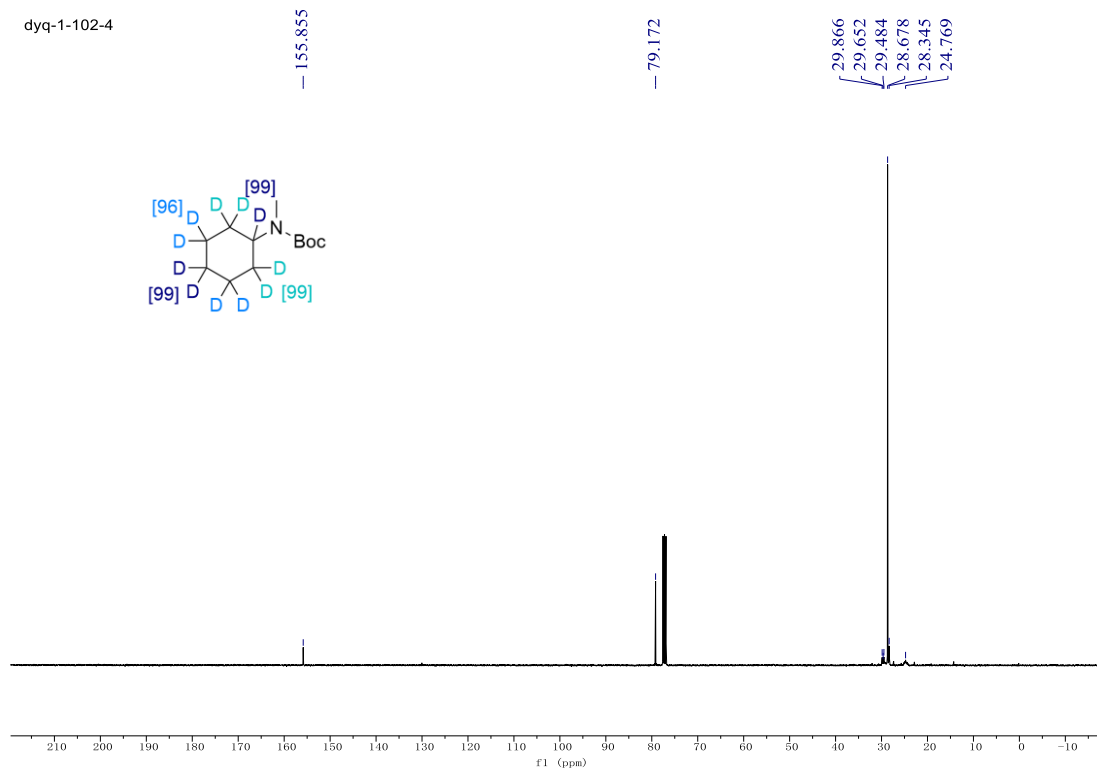

# <sup>19</sup>F NMR for 17f

dyq-1-102-4

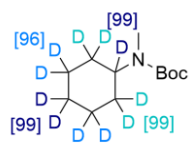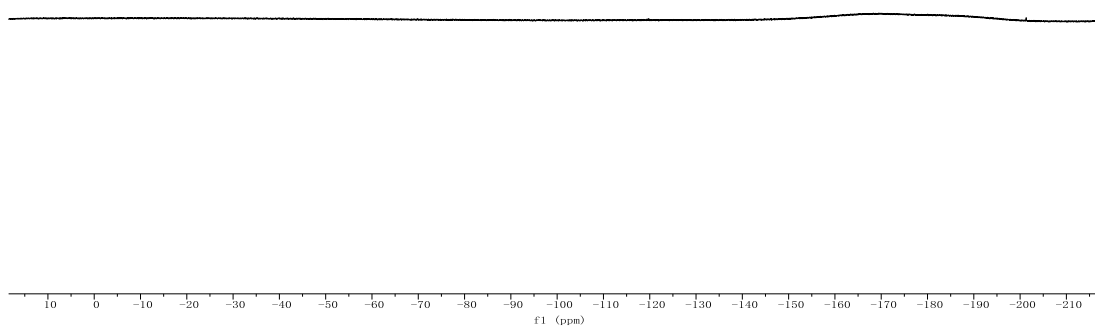

# <sup>1</sup>H NMR for 18f

dyq-1-112-3

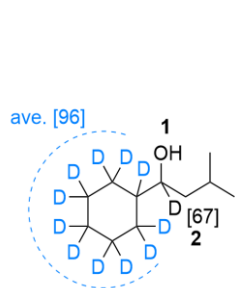

3.390  
3.306

1.771  
1.542  
1.446  
1.390  
1.321  
1.128  
0.970  
0.818

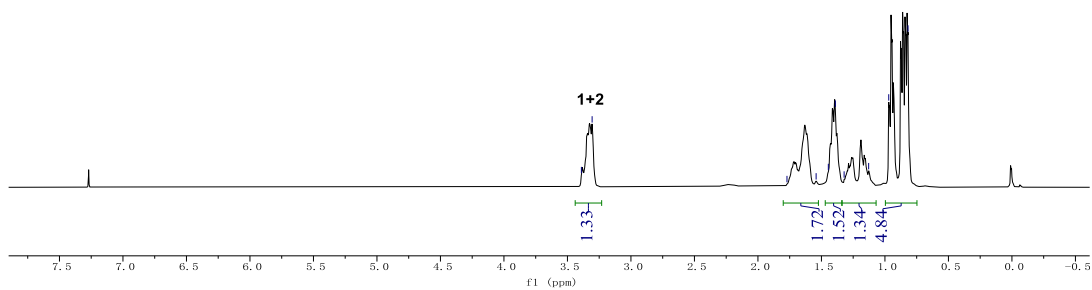

# <sup>13</sup>C NMR for 18f

dyq-1-112-3

— 73.427  
— 58.689  
43.100  
42.996  
27.812  
26.480  
24.807  
24.319  
23.926  
23.575  
21.501  
19.499  
13.455

ave. [96]

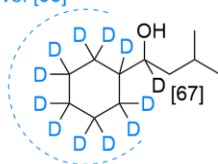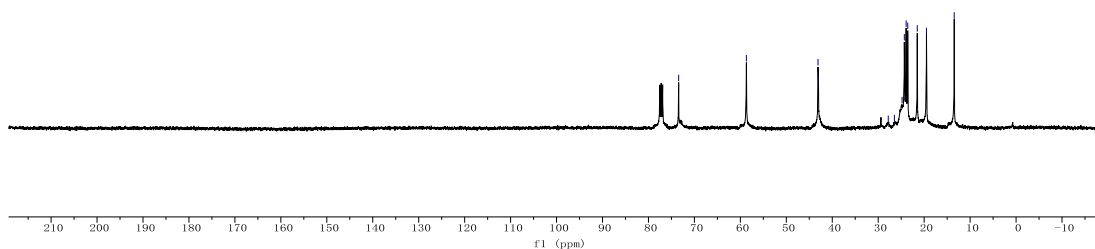

# <sup>19</sup>F NMR for 18f

dyq-1-112-3

ave. [96]

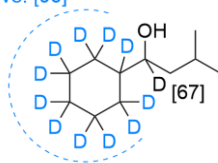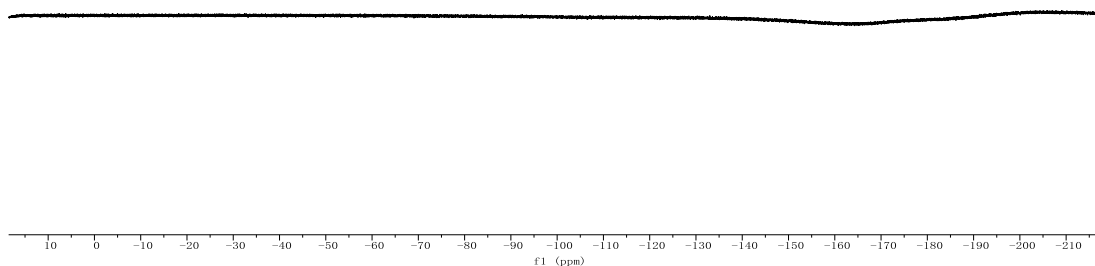

# <sup>1</sup>H NMR for 19f

dyq-1-128-4

3.271  
3.251  
2.529  
2.429  
2.019  
1.530  
1.391  
1.160  
1.060

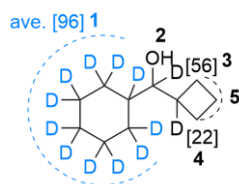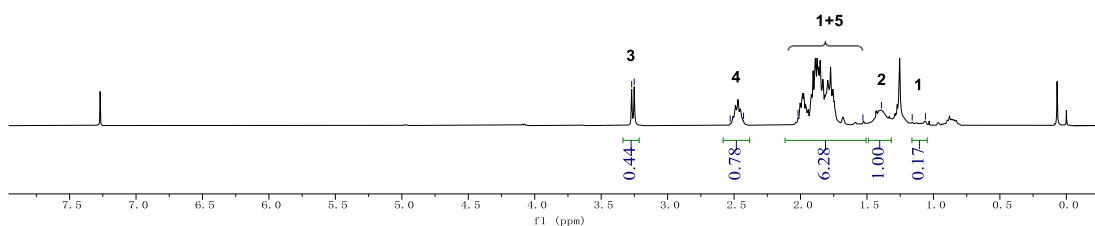

# <sup>13</sup>C NMR for 19f

dyq-1-128-4

80.151  
79.699  
40.804  
39.098  
39.008  
28.719  
25.571  
25.329  
25.310  
25.165  
24.975  
24.955  
24.795  
18.440

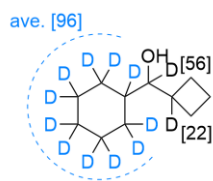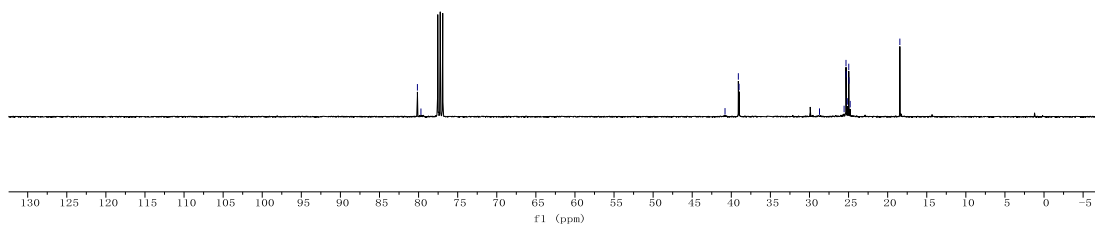

# <sup>19</sup>F NMR for 19f

dyq-1-128-4

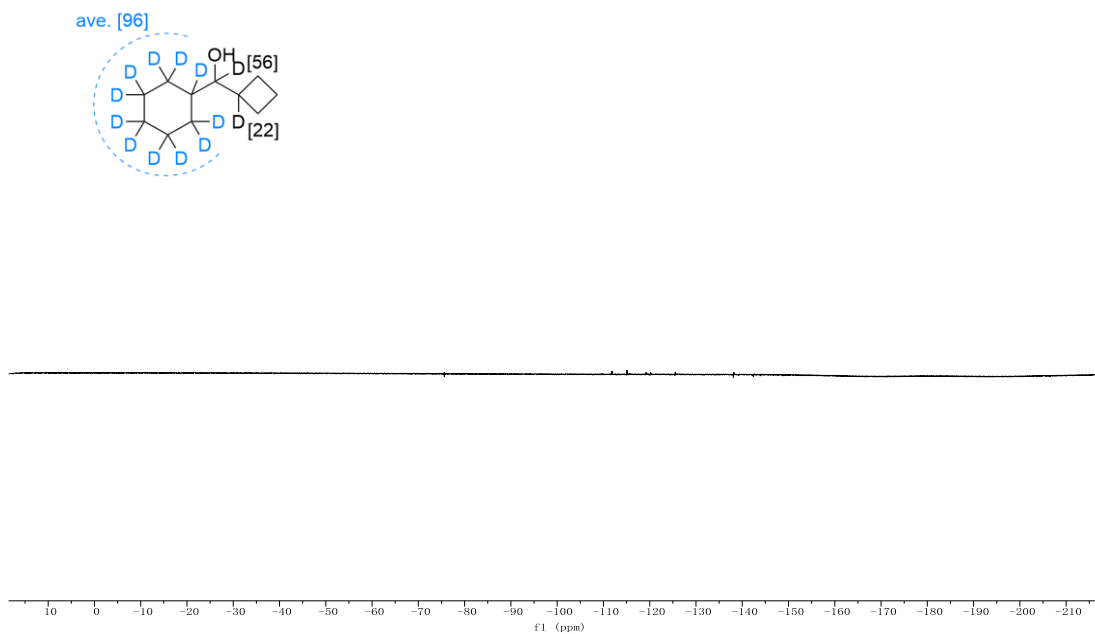

# <sup>1</sup>H NMR for 20f

dyq-1-113-1

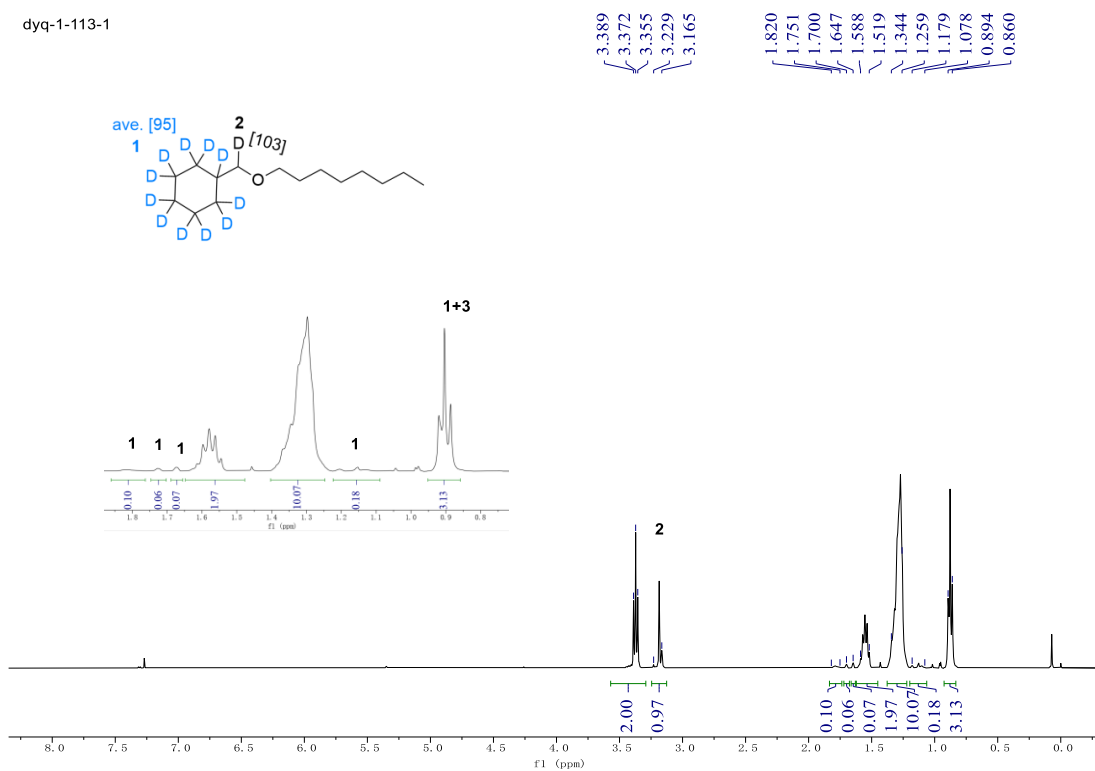

# <sup>13</sup>C NMR for 20f

dyq-1-113-1

76.958  
76.748  
76.328  
71.352  
71.314  
71.276  
37.751  
36.656  
32.053  
29.962  
29.676  
29.492  
26.396  
25.728  
24.615  
22.862  
14.274

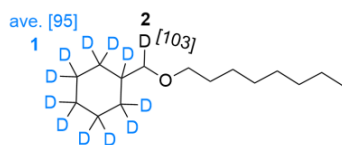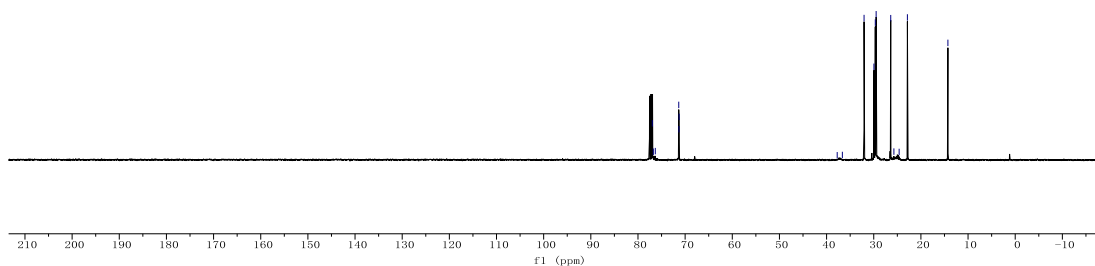

# <sup>19</sup>F NMR for 20f

dyq-1-113-1

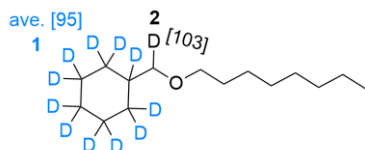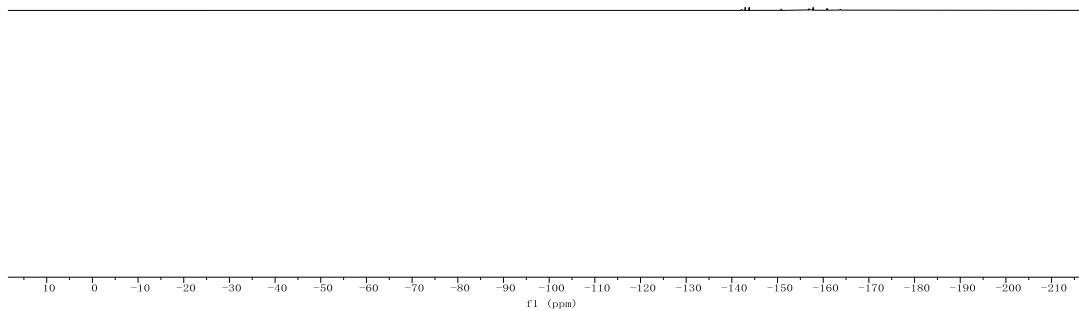

# <sup>1</sup>H NMR for [D]1h

bfx-8-116-1

9.018  
9.014  
8.977  
8.962  
8.947  
8.596  
8.592  
7.801  
7.780  
7.452  
7.432

— 6.375

3.598  
3.580  
3.562  
3.546  
2.977  
2.958  
2.941  
2.578  
1.571  
1.531  
1.509  
1.347  
1.137  
1.046  
1.037

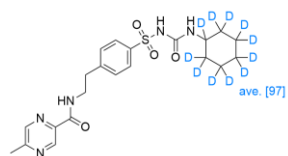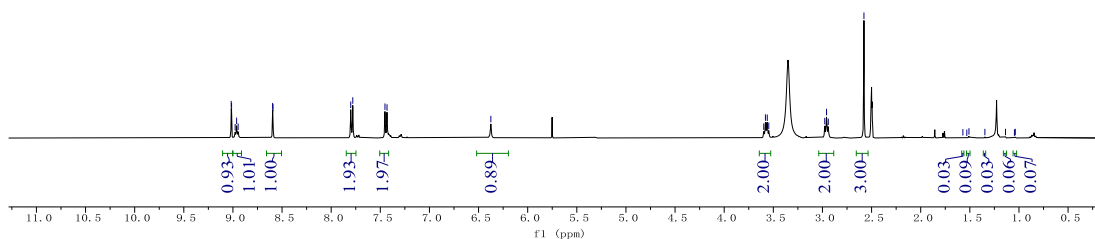

# <sup>13</sup>C NMR for [D]1h

bfx-8-116-1

163.687  
157.171  
144.767  
142.927  
142.744  
142.606  
141.652  
129.354  
127.513

40.075  
35.434  
31.901  
29.271  
23.441  
21.396

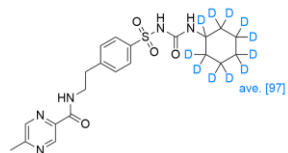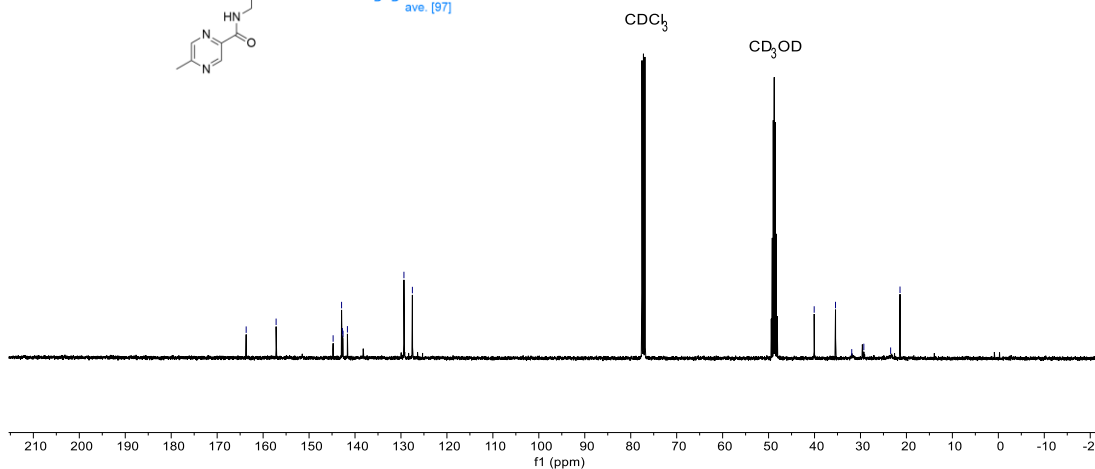



# <sup>1</sup>H NMR for [D]2h

bfj-xj-155-1

7.278  
7.168

5.177  
5.170  
5.143  
5.137  
4.991  
4.771  
4.478  
4.435  
4.378  
4.310  
4.093  
4.049  
3.877  
3.831  
3.302  
3.219  
3.016  
2.761  
2.528  
2.428

1.759  
1.648  
1.504  
1.423  
1.222  
1.201

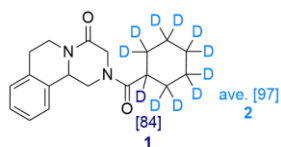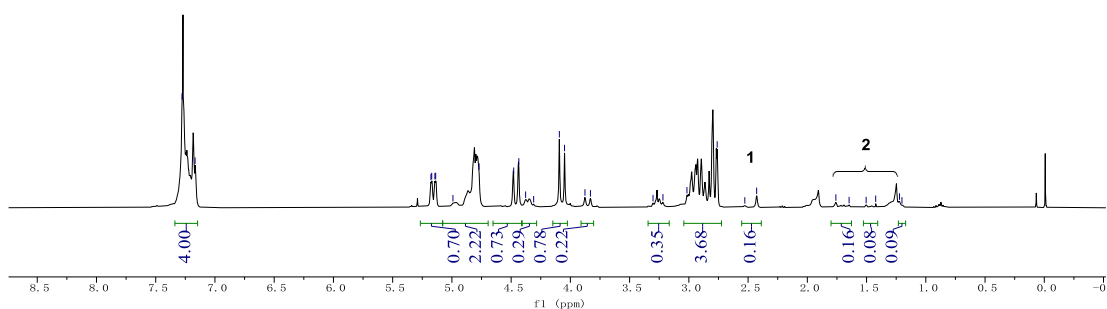

# <sup>13</sup>C NMR for [D]2h

bfj-xj-155-1

175.016  
165.706  
164.563  
135.661  
134.874  
132.913  
129.822  
129.440  
128.970  
128.794  
127.847  
127.690  
127.588  
127.121  
125.623  
125.324

55.935  
55.097  
49.671  
49.145  
46.437  
45.267  
40.500  
40.115  
39.239  
38.792  
28.864  
28.333  
24.722

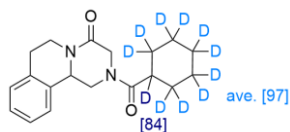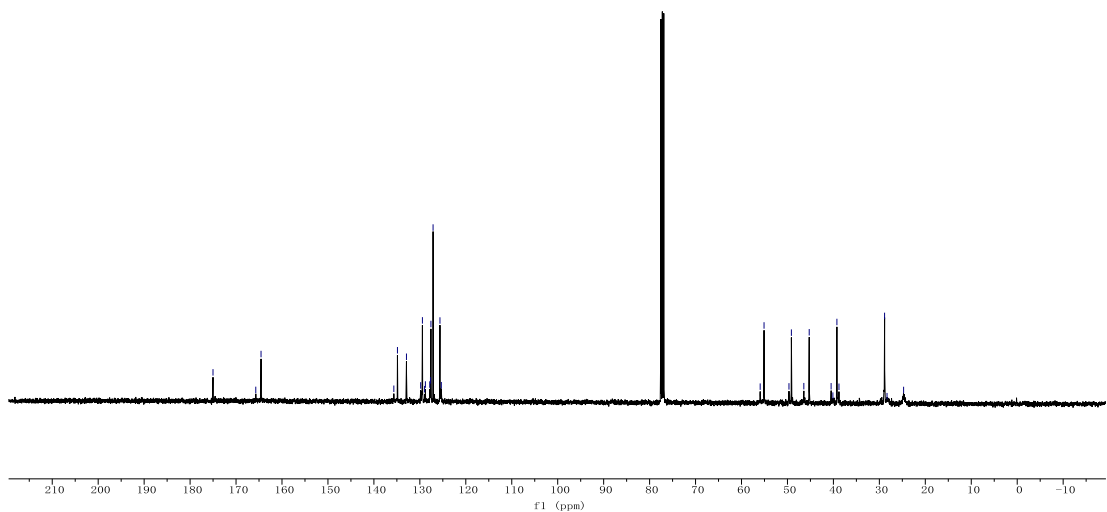

# <sup>1</sup>H NMR for [D]3h

bfx-8-151-2

7.541  
7.494  
7.182  
7.138

5.297  
5.018

4.216  
4.054

2.765  
2.591

1.691  
1.687  
1.683  
1.587  
1.559  
1.434  
1.361

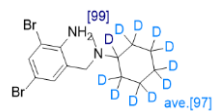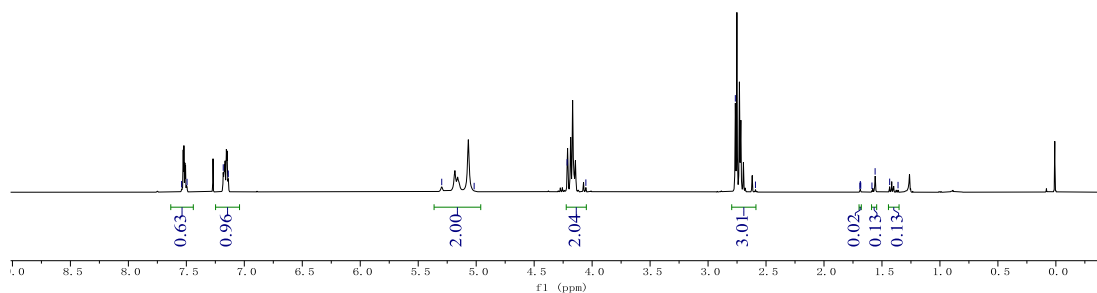

# <sup>13</sup>C NMR for [D]3h

bfx-8-151-2

143.937  
143.775  
143.746  
134.436  
134.318  
134.234  
134.117  
132.459  
132.436  
124.200  
123.994  
123.725  
123.540  
110.705  
110.561  
108.702  
108.662  
108.496

58.788  
58.591

41.595  
41.210

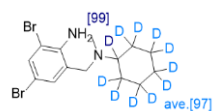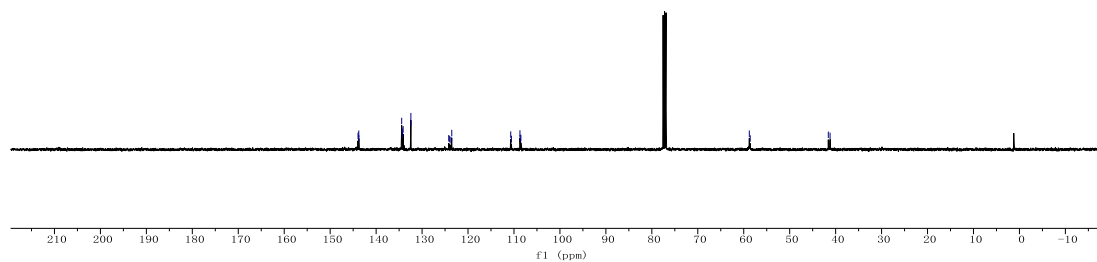

# <sup>1</sup>H NMR for 4h

bfX-8-132-2a

10.518

5.642

3.549  
3.507  
3.384  
3.272  
2.563  
2.172  
1.898  
1.634  
1.324  
1.271  
1.108  
1.054

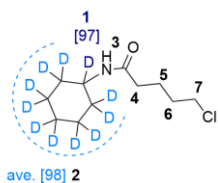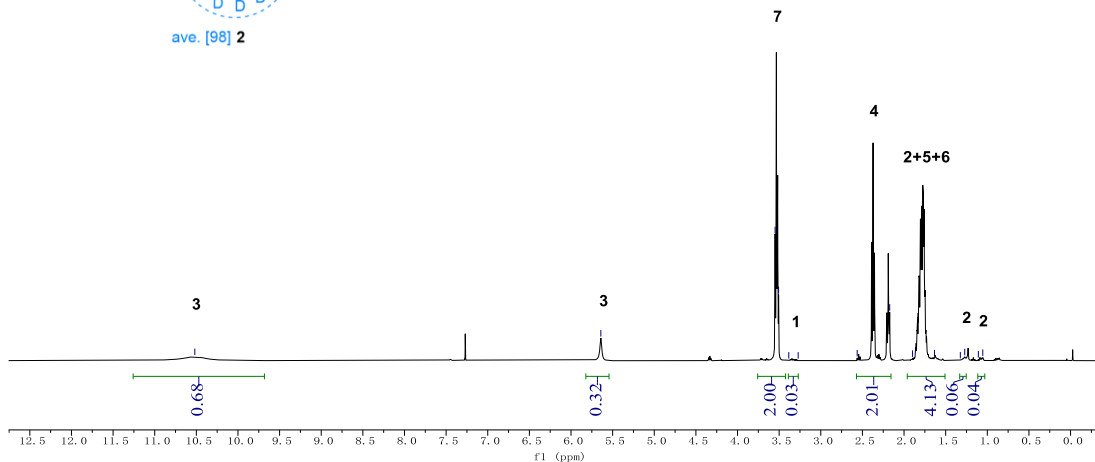

# <sup>13</sup>C NMR for 4h

bfX-8-132-2a

178.496  
172.299

48.018  
47.598  
44.733  
44.566  
36.015  
33.343  
32.126  
32.031  
31.880  
24.471  
23.704  
23.254  
22.176

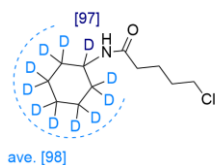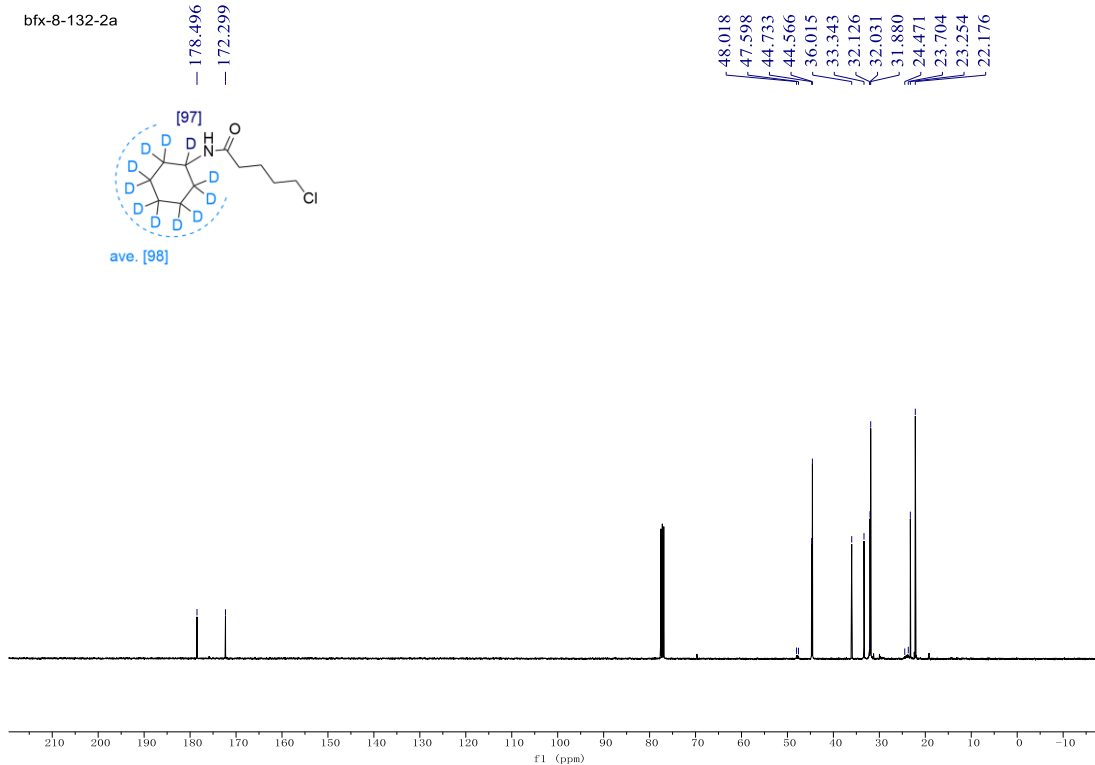

# <sup>1</sup>H NMR for [D]5h

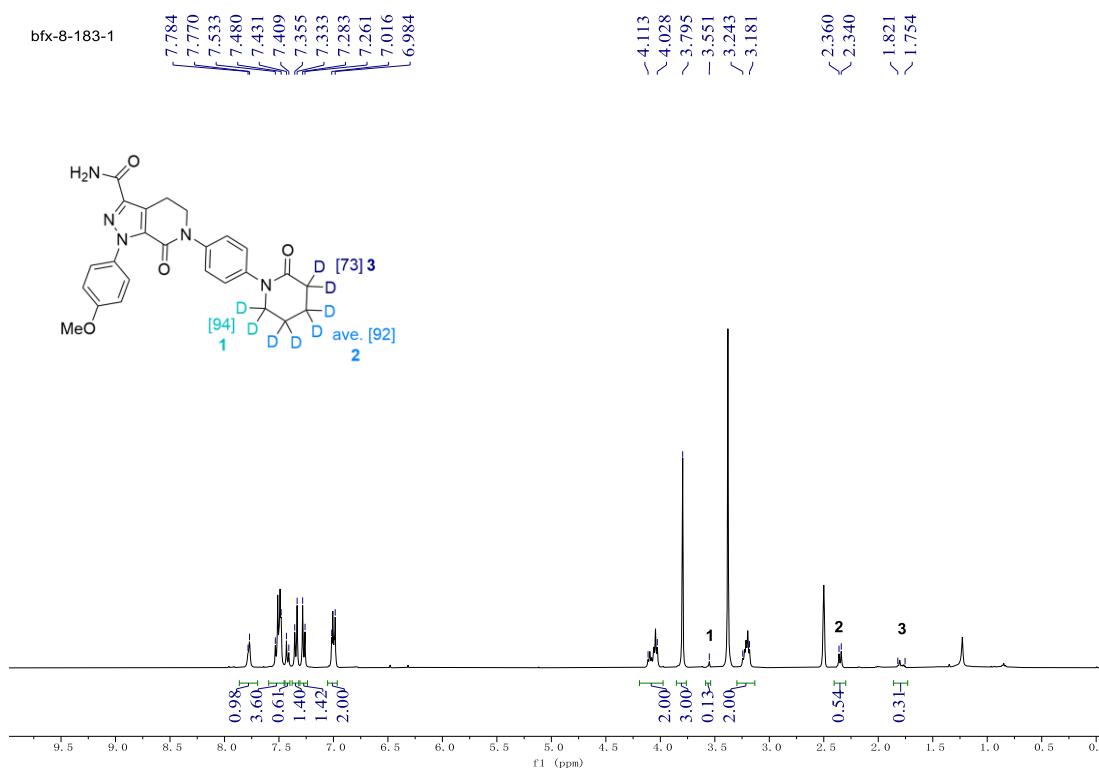

# <sup>13</sup>C NMR for [D]5h

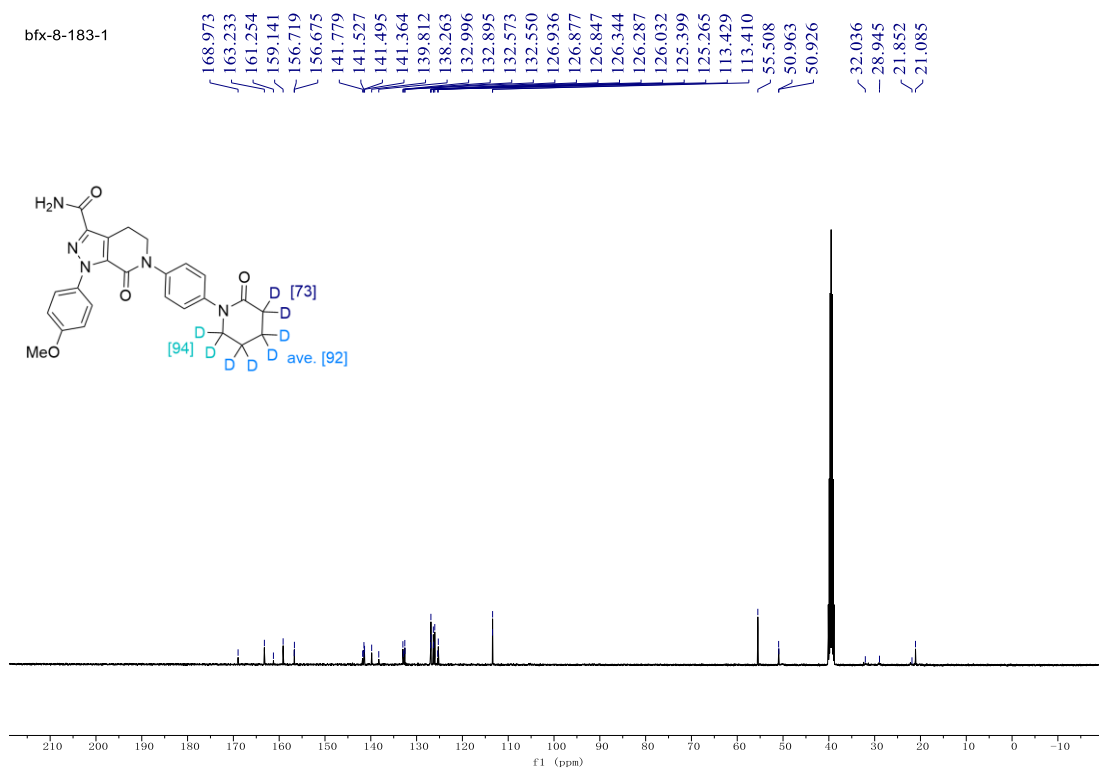

# <sup>1</sup>H NMR for [D]6h

bfx-8-184-1

3.158  
3.139  
3.119  
3.100  
2.774  
2.636  
2.353  
2.334  
2.315  
2.244  
2.225  
2.206  
2.033  
2.018  
2.002  
1.986  
1.637  
1.385

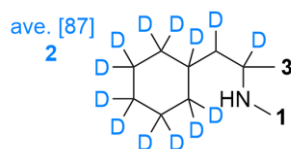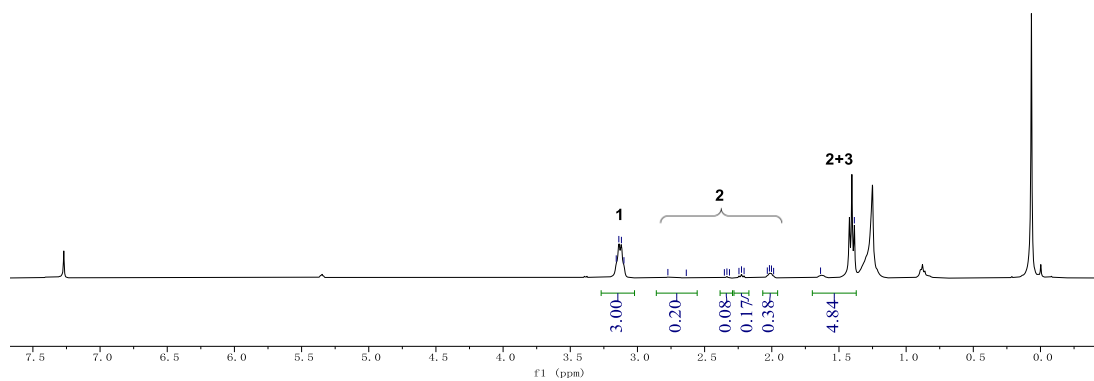

# <sup>13</sup>C NMR for [D]6h

bfx-8-184-1

46.056  
29.904  
29.526  
8.824

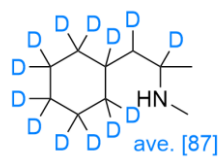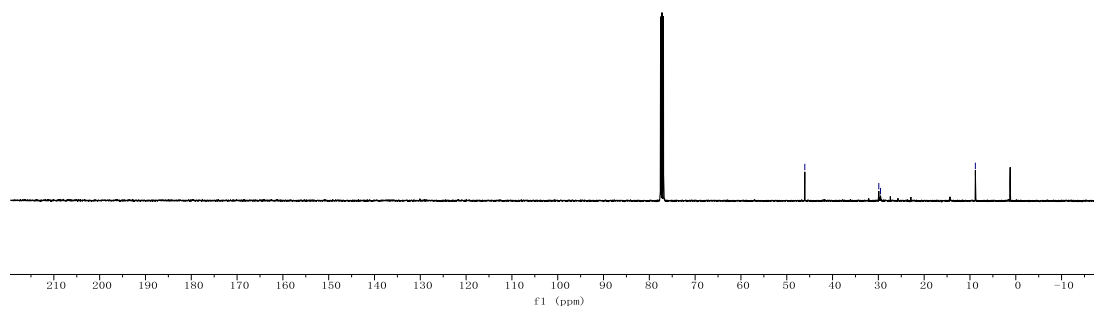

# <sup>1</sup>H NMR for [D]7h

bfj-xj-1-18-3

7.700  
7.402  
7.393  
7.257  
7.236  
7.137  
7.033  
6.617  
6.480

3.849

2.735

2.001

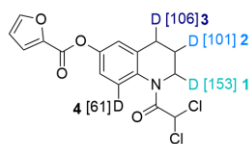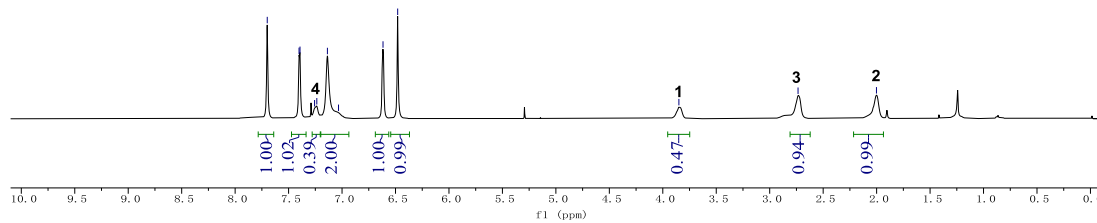

# <sup>13</sup>C NMR for [D]7h

bfj-xj-1-18-3

164.065  
156.805  
148.551  
147.612  
143.532  
136.315  
135.347  
135.274  
123.904  
122.320  
120.325  
120.058  
112.443

63.965

43.751

26.087  
22.789

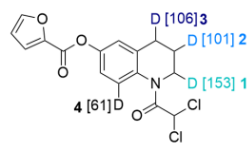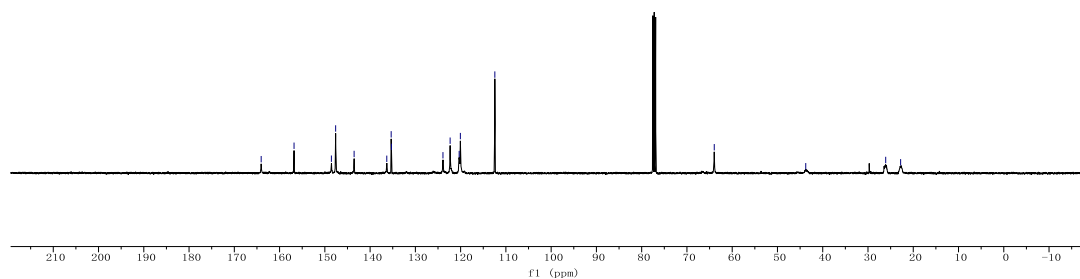

# <sup>1</sup>H NMR for 10d'

bfx-8-176-1

-3.488

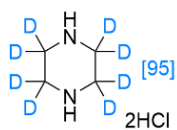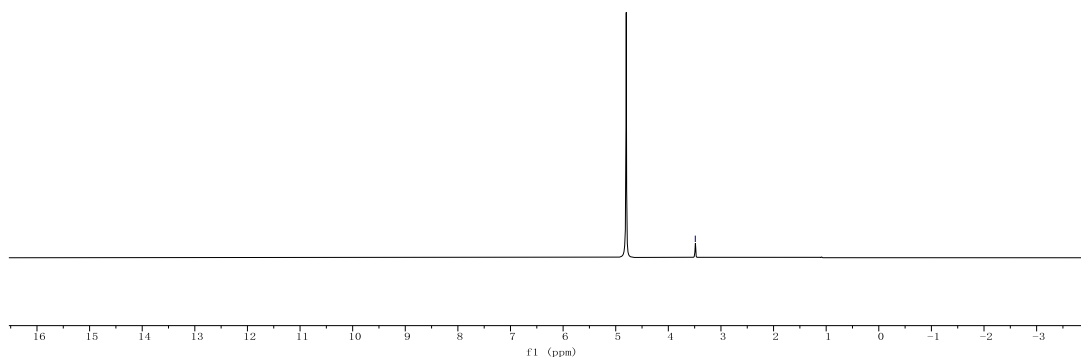

# <sup>13</sup>C NMR for 10d'

bfx-8-176-1

39.948  
39.715  
39.483  
39.240

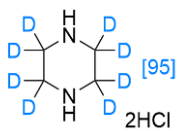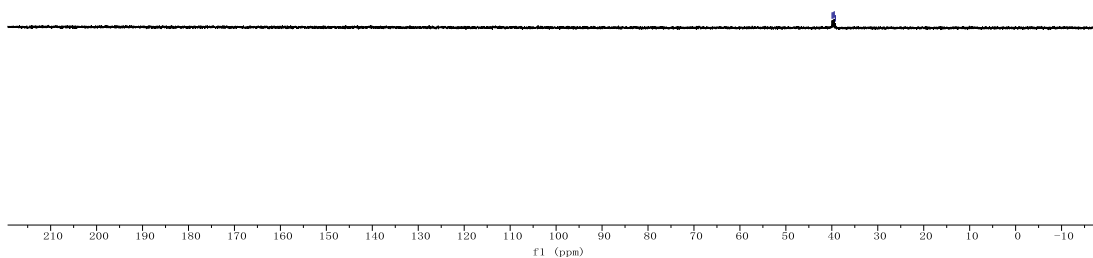

# <sup>1</sup>H NMR for [D]8h

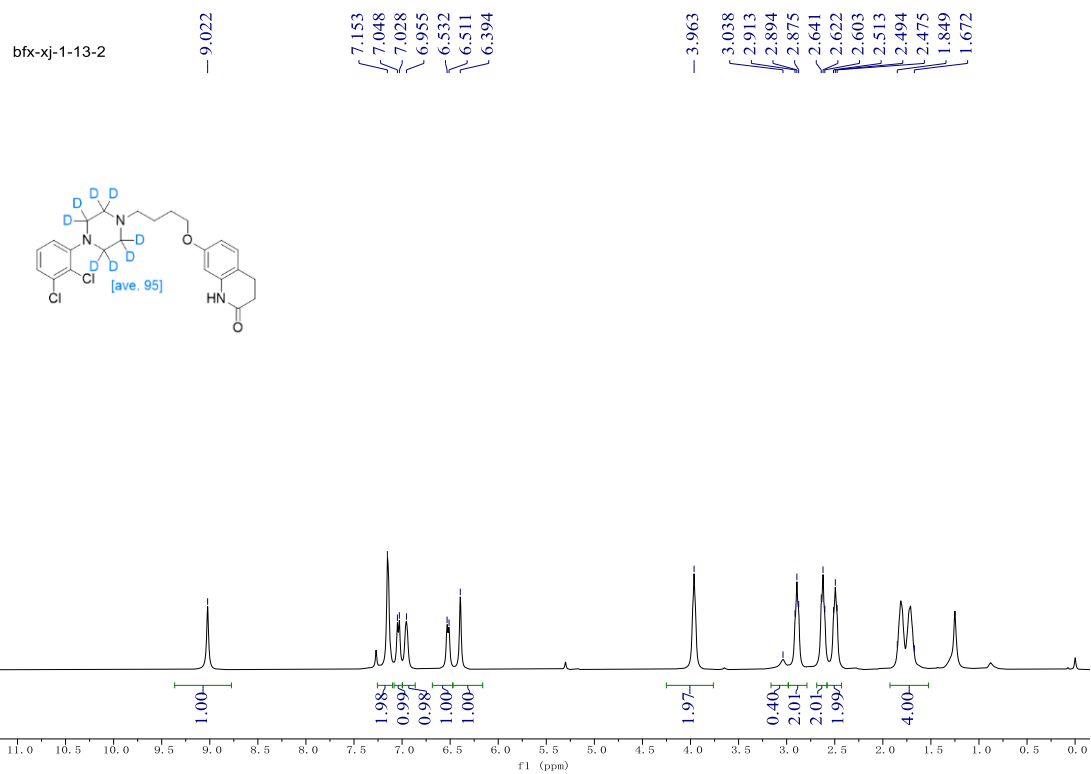

# <sup>13</sup>C NMR for [D]8h

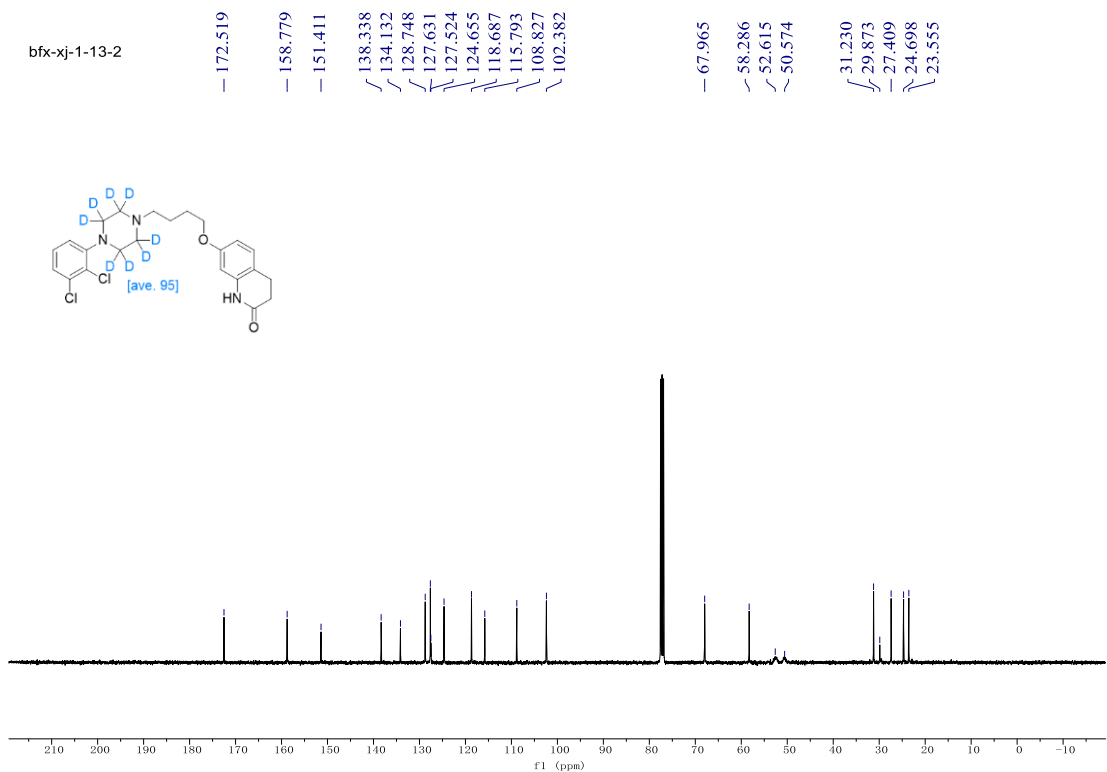



# <sup>1</sup>H NMR for [D]9h

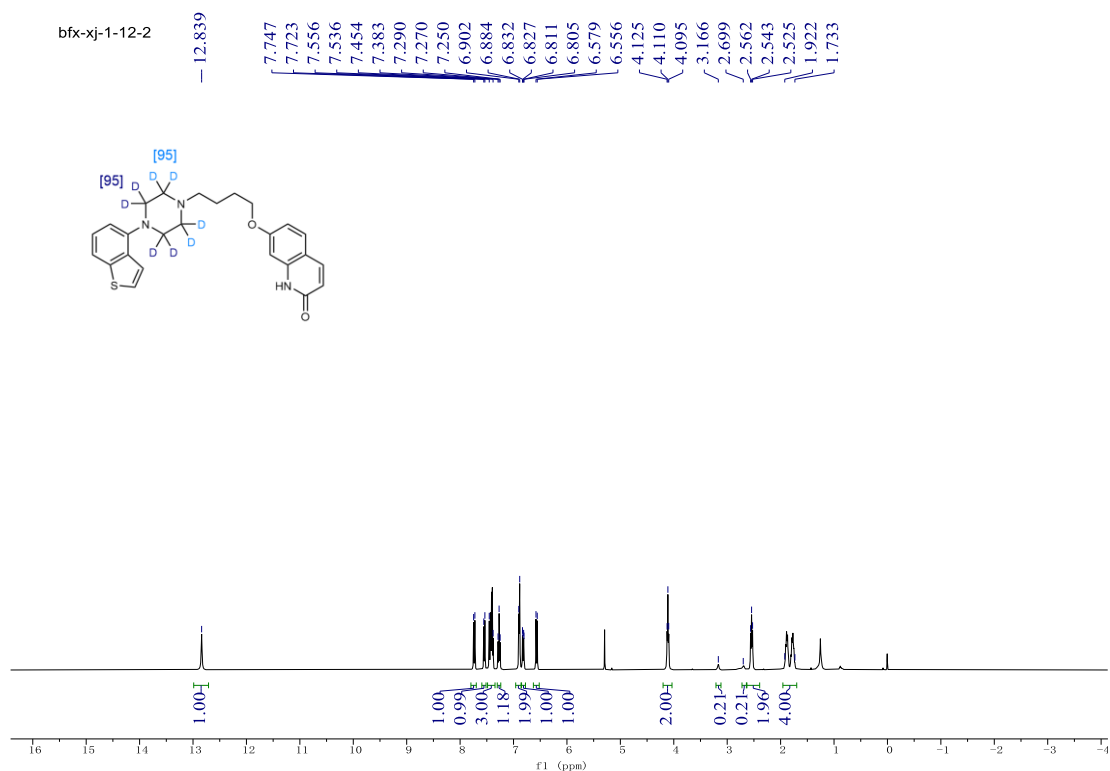

# <sup>13</sup>C NMR for [D]9h

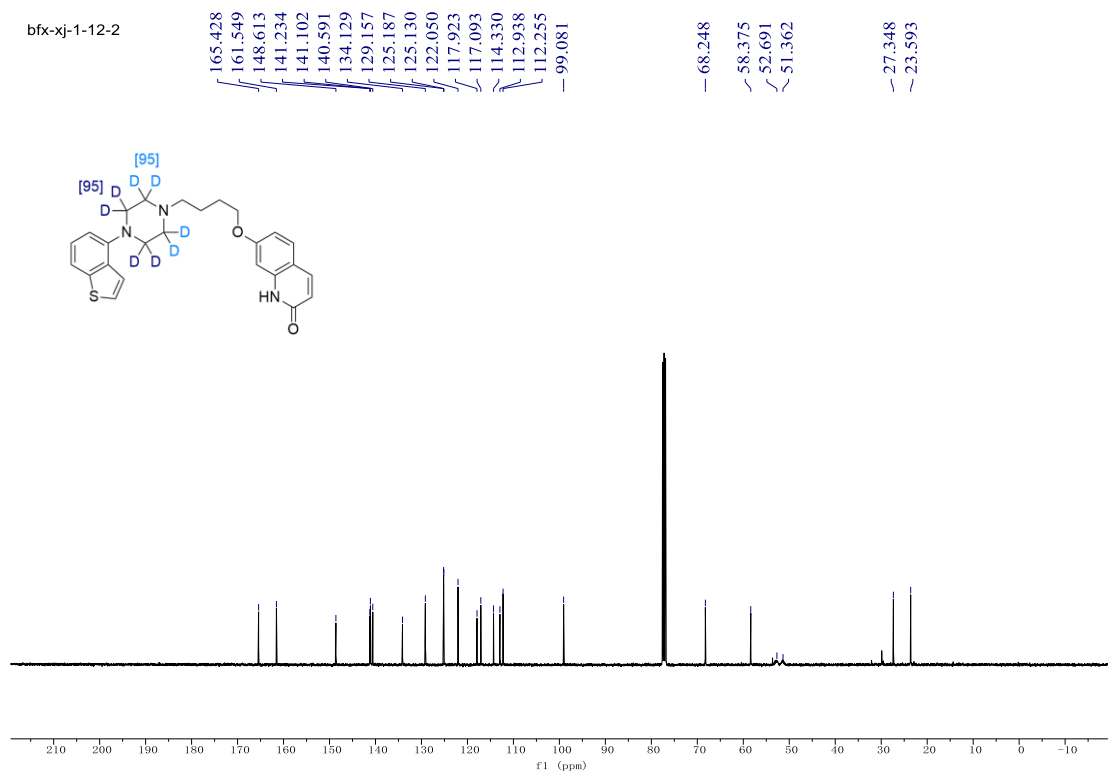

### <sup>1</sup>H NMR for [D]10h

bfx-xj-1-17-2

$$\begin{array}{r} -6.949 \\ -6.928 \\ -6.645 \\ -6.492 \end{array}$$
$$\begin{array}{r} 3.864 \\ - 3.852 \\ \hline \end{array}$$
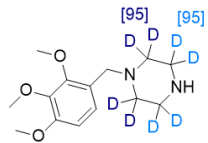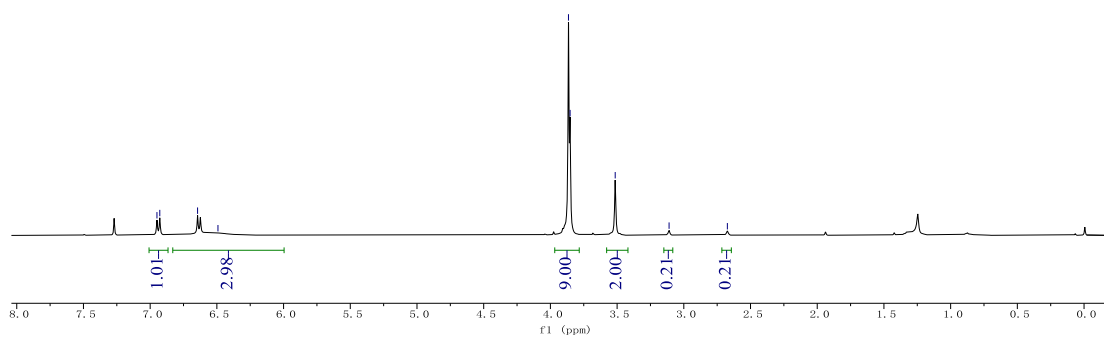

### <sup>13</sup>C NMR for [D]10h

bfx-xj-1-17-2

$$\begin{array}{r} 153.446 \\ - 152.830 \\ \hline \end{array}$$
$$\begin{aligned} & \sim 125.353 \\ & \sim 122.917 \\ & - 107.106 \end{aligned}$$

61.449  
60.996  
56.475  
56.131  
49.326  
43.567

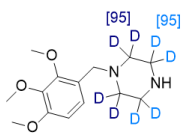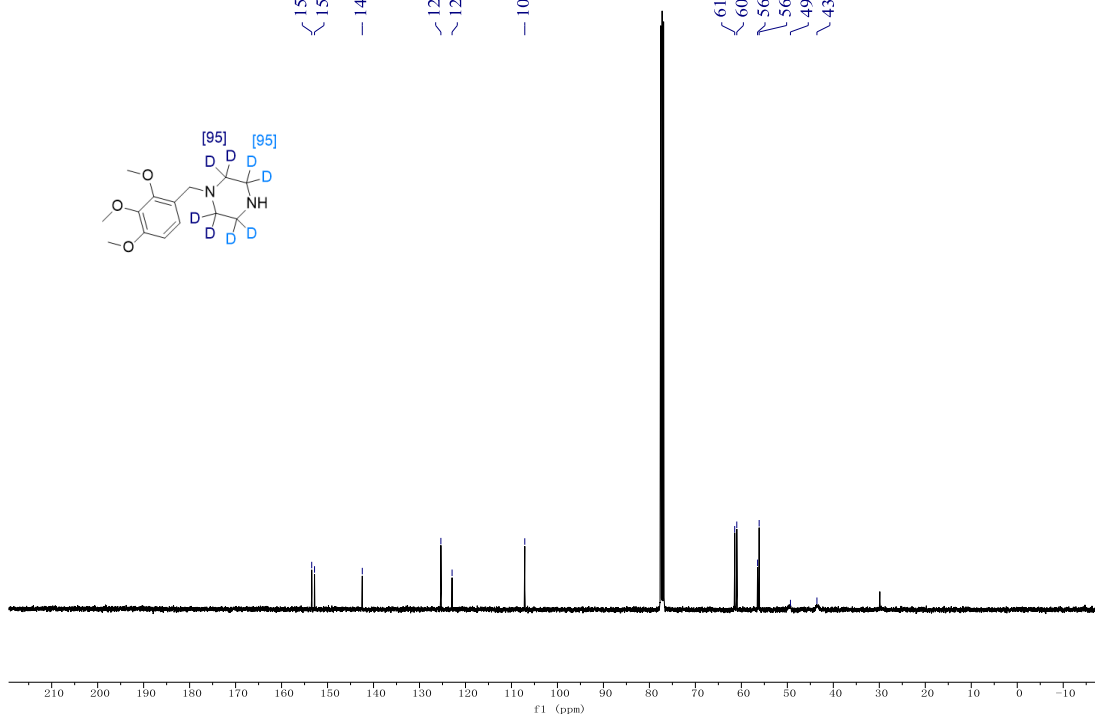

# <sup>1</sup>H NMR for [D]11h

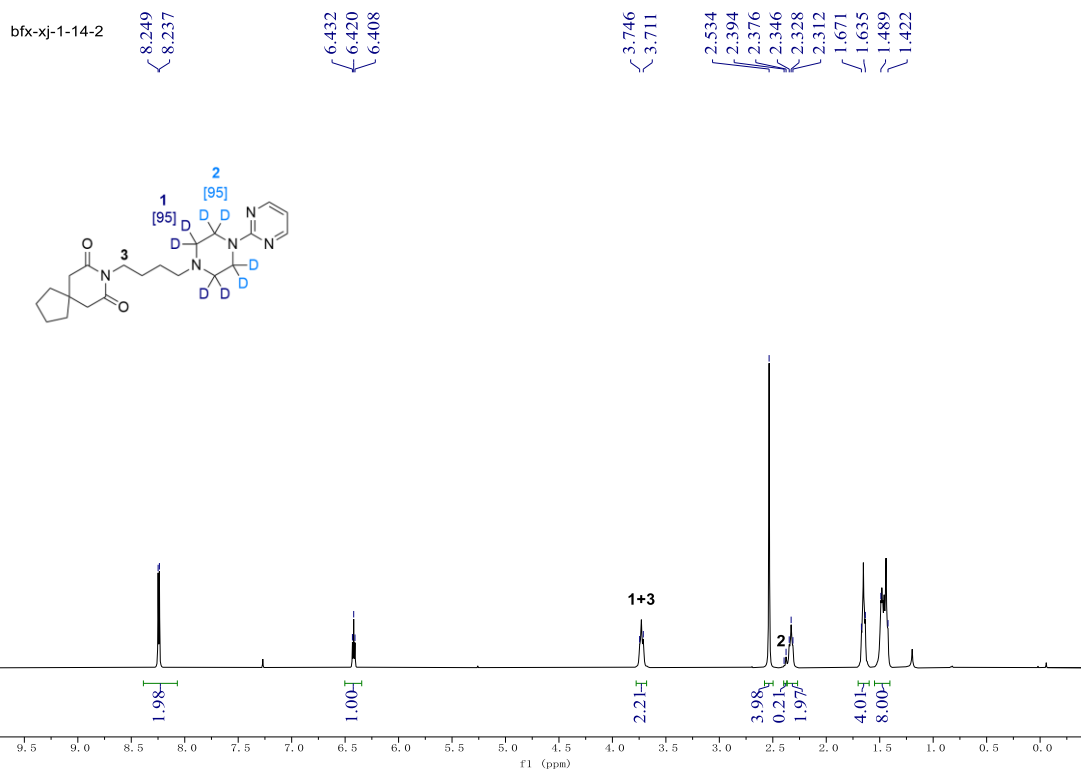

# <sup>13</sup>C NMR for [D]11h

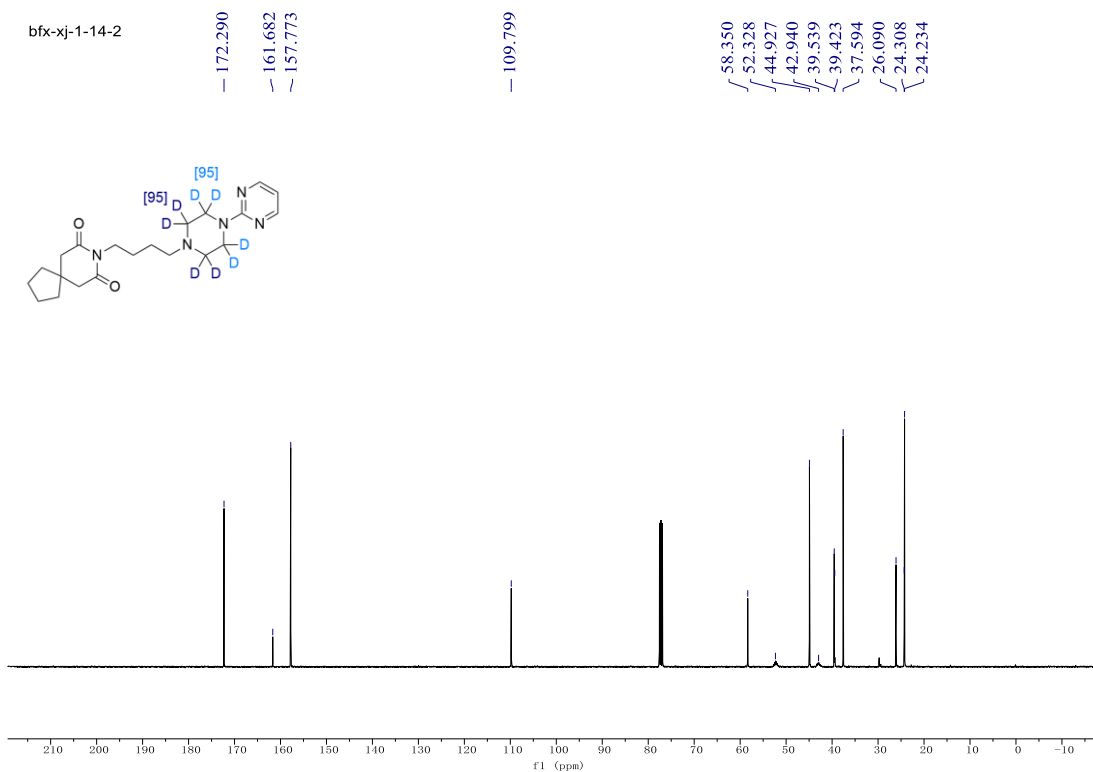

# <sup>1</sup>H NMR for [D]12h

bfX-xj-1-16-2

7.239  
7.217  
6.878  
6.829  
6.753  
6.695  
— 5.940  
— 4.651  
3.562  
3.494  
3.396  
2.347  
2.335

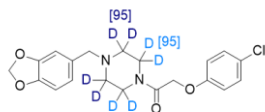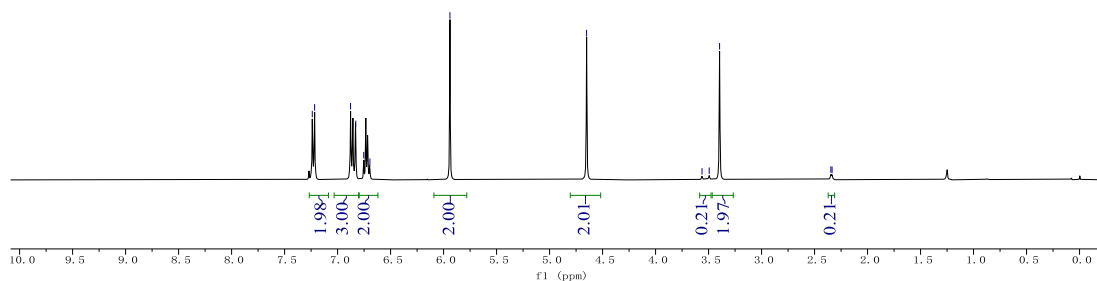

# <sup>13</sup>C NMR for [D]12h

bfX-xj-1-16-2

166.091  
156.556  
147.819  
146.864  
131.507  
129.591  
126.596  
122.284  
116.038  
109.421  
108.037  
101.082  
67.833  
62.527  
51.926  
44.692

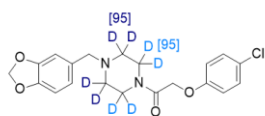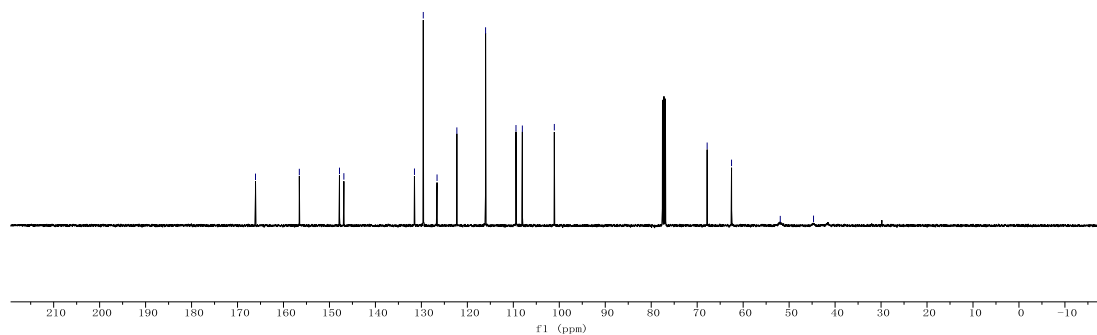

# <sup>1</sup>H NMR for [D]13h

bfx-xj-1-19-1

~ 7.553

~ 7.018

~ 6.907

~ 3.819

~ 3.727

~ 3.512

~ 3.120

~ 2.666

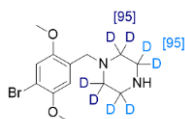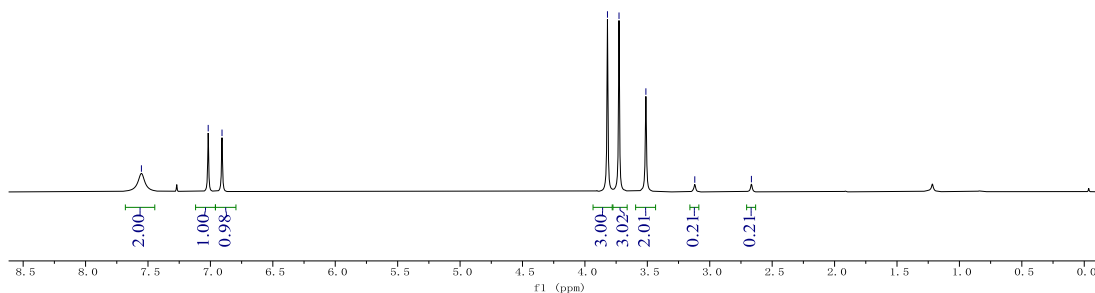

# <sup>13</sup>C NMR for [D]13h

bfx-xj-1-19-1

~ 152.218

~ 150.068

~ 125.458

~ 116.216

~ 114.338

~ 110.345

~ 56.991

~ 56.331

~ 55.401

~ 49.257

~ 43.246

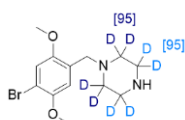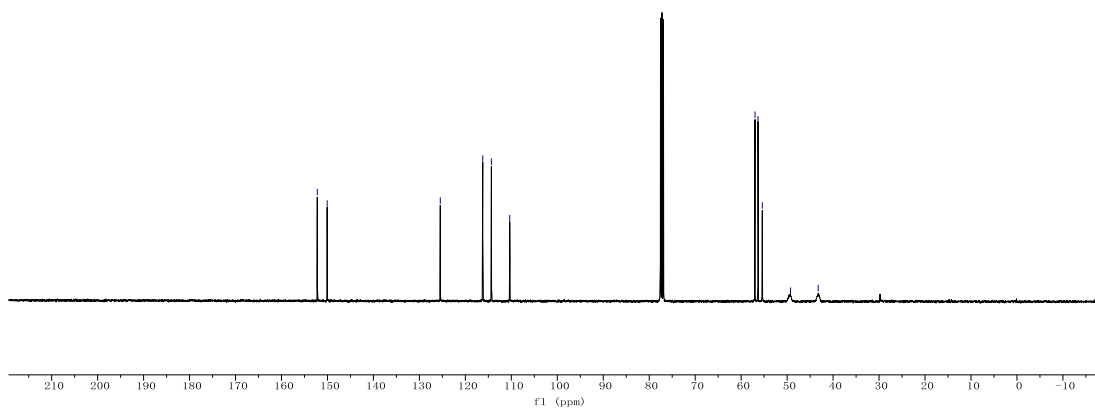

## 14. Reference

1. Sawama, Y., Yamada, T., Yabe, Y., Morita, K., Shibata, K., Shigetsura, M., Monguchi, Y. & Sajiki, H. Platinum on Carbon-Catalyzed H-D Exchange Reaction of Aromatic Nuclei due to Isopropyl Alcohol-Mediated Self-Activation of Platinum Metal in Deuterium Oxide. *Adv. Synth. Catal.* **355**, 1529-1534 (2013).
2. Farizyan, M., Mondal, A., Mal, S., Deufel, F. & van Gemmeren, M. Palladium-Catalyzed Nondirected Late-Stage C-H Deuteration of Arenes. *J. Am. Chem. Soc.* **143**, 16370-16376 (2021).
3. Hosseinzadeh, R., Tajbakhsh, M., Mohadjerani, M. & Mehdinejad, H. Copper-Catalyzed Amidation of Aryl Iodides Using KF/Al<sub>2</sub>O<sub>3</sub>: An Improved Protocol. *Synlett* **9**, 1517-1520 (2004).
4. Deng, C.-L., Guo, S.-M., Xie, Y.-X. & Li, J.-H. Mild and Ligand-Free Palladium-Catalyzed Cross-Couplings between Aryl Halides and Arylboronic Acids for the Synthesis of Biaryls and Heterocycle-Containing Biaryls. *Eur. J. Org. Chem.* **2007**, 1457-1462 (2007).
5. Goudedranche, S., Besnard, C., Egger, L. & Lacour, J. Synthesis of Pyrrolidines and Pyrrolizidines with  $\alpha$ -Pseudoquaternary Centers by Copper-Catalyzed Condensation of  $\alpha$ -Diazodicarbonyl Compounds and Aryl  $\gamma$ -Lactams. *Angew. Chem. Int. Ed.* **55**, 13775-13779 (2016).
6. Dutremez, S. G., Dumail, X., Mallet-Ladeira, S., van der Lee, A., Granier, D., Masquelez, N. & Filhol, J.-S. Pentafluorophenylphosphonic Acid as a New Building Block for Molecular Crystal Fabrication. *Cryst. Growth Des.* **21**, 2028-2045 (2021).
7. Chen, W., Li, H.-J., Lu, W.-Y. & Wu, Y.-C. Ruthenium(II)-catalyzed Monohydroalkylation of  $\alpha,\beta$ -Unsaturated Ketones with N-Acyl Pyrroles using a C-H Activation Strategy. *Asian J. Org. Chem.* **9**, 1602-1609 (2020).
8. Raju, B. C., Neelakantan, P. & Bhalerao, U. T. A Facile and Convenient Method for the Synthesis of Nitro Phenols and Chloropyridinols. *Synth. Commun.* **34**, 2903-2909 (2004).
